# Supplementary material for: Benchmarking and Automating the Biotinylation Proteomics Workflow
Source: Research Square preprint supplement (doi:10.21203/rs.3.rs-4590410/v1), 2024-07-03
Supplement: Supplementary file 1 [file 20240615_source data.xlsx]

## Sheet: Fig 1
C
	Protein level	Peptide level
Total yeast peptide	2578	761
Biotinylated yeast peptide	4	753
Human peptide	693	45
E
Cytiva Beads Amount (uL)	Protein level Normalized (%)	Peptide level Normalized (%)			NA high affinity Beads Amount (uL)	Protein level Normalized (%)	Peptide level Normalized (%)			Biotin antibody Beads Amount (uL)	Protein level Normalized (%)	Peptide level Normalized (%)
0	100	100			0	100	100			0	99.9616	100
10	99.8041	97.3884			10	99.9317	90.2375			5	100	86.8853
25	98.9609	93.1061			25	99.9588	72.5874			10	99.9874	74.7185
50	97.6282	88.2659			50	99.9631	65.7991			20	89.8859	64.223
100	99.366	50.7343			75	99.962	29.228			40	9.34337	47.2409
150	90.0195	28.3487			100	14.8334	25.7766			60	8.73853	30.542
200	86.2985	1.28145			150	15.6606	25.061			80	8.41218	27.2809
250	10.5348	0.830589			200	16.7946	26.3055			100	9.46105	22.1628
F
SA Protein Level On-bead Digestion Beads Amount (uL)	Total Protein	Yeast Protein	Human Protein		NA high affinity protein level Beads Amount (uL)	Total Protein	Yeast Protein	Human Protein		BA Peptide Level Beads Amount (uL)	Total Protein	Yeast Protein	Human Protein
10 uL	327	257	70		10 uL	728	399	329		5 uL	81	61	20
25 uL	728	556	172		25 uL	835	409	426		10 uL	125	118	7
50 uL	1298	846	452		50 uL	1603	905	698		15 uL	223	202	21
100 uL	1414	900	514		100 uL	1653	901	752		20 uL	373	336	37
150 uL	1375	884	491		150 uL	370	188	182		30 uL	474	430	44
250 uL	1430	948	482		250 uL	997	57	940		40 uL	490	441	49
H
Beads Amount (uL)	Human peptide	Yeast peptide	Biotinylated Yeast Peptide	Non-biotinylated yeast
SA	903	2897	7	2890
NA	1557	3460	96	3364
BA	43	1511	1501	10

## Sheet: Fig 2
A
Cytiva
Enrichment time (hr)	Normalized
0	100
2	35.83
4	14.93
6	14.56
12	12.42
B
SA Protein Level	Human peptide	Yeast peptide	Biotinylated Yeast Peptide	Non-biotinylated yeast
On-bead 100 uL	903	2897	7	2890
Seqeuntial boiling 100 uL	18	371	360	11
C
	Biotinylated Yeast Peptide	Non-biotinylated yeast peptide	Human peptide	Biotinylated Yeast Peptide	Non-biotinylated yeast peptide	Human peptide
ReSyn On-bead digestion	20	4799	6933	0.00170184	0.408356	0.589942
Cytiva beads boiling	4630	7904	630	0.351717	0.600425	0.0478578
Cytiva On-bead digestion (Y0509_100 uL)	7	2890	903	0.00184211	0.760526	0.237632
D
	1h 47°C	2h 47°C	4h 47°C	12h 37°C	1h 47°C+Ca
Protein ID (1)	2111	1869	1635	1696	2001
Protein ID (2)	2010	1806	1833	1966	1953
Protein ID (3)	2084	1305	1995	1906	2049
	1h 47°C	2h 47°C	4h 47°C	12h 37°C	1h 47°C+Ca
Peptide ID (1)	7449	5962	5376	5534	7187
Peptide ID (2)	7377	5644	6326	6767	6805
Peptide ID(3)	7645	3644	7393	6598	7145
E
# miscleavage	1h 47°C, no Ca2+	2h 47°C, no Ca	4h 47°C, no Ca	12h 37°C, no Ca	1h 47°C, + Ca	2h 47°C, + Ca	4h 47°C, + Ca
0	81.39	87.17	83.06	87.34	89.54	91.96	93.1
1	16.65	11.54	15.19	11.26	9.91	7.72	6.62
2	1.7	0.97	1.52	1.14	0.48	0.28	0.28
3	0.21	0.29	0.2	0.23	0.07	0.04	0
4	0.04	0.04	0.03	0.03	0	0	0
G
Step	Automated	Manual	Conventional
Plate Set-Up	0.08	0.08	0.08
Enrichment	4	4	16
Beads washes	0.75	0.75	0.75
Add bead boiling buffer	0.02	0.02	0.02
Beads boiling	0.33	0.33	0.33
Prepare and swap plates	0.17	0	0
Add AA	0.03	0.03	0.03
AA treatment	0.67	0.67	0.67
Add DTT	0.03	0.03	0.03
DTT treatment	0.33	0.33	0.33
SP3 Plate Swap/Set-up	0.08	0	0
SP3 clean up	0.93	1.1	1.1
Add Enzyme	0.03	0.03	0.03
Tryptic digestion	1	1	16
Dry down	1	1	1
Total Time (min)	9.47	9.38	36.38
Labor time (min)	0.43	2.05	2.05

## Sheet: Fig 3
B
	KingFisher_1	KingFisher_2	KingFisher_3	KingFisher_4	Manual_1	Manual_2	Manual_3	Manual_4
Total Protein	1908	1964	1930	1974	1807	1805	1823	1798
Yeast Protein	1472	1508	1480	1515	1384	1347	1396	1373
Human Protein	436	456	450	459	423	458	427	425
D
	KingFisher_1	KingFisher_2	KingFisher_3	KingFisher_4	Manual_1	Manual_2	Manual_3	Manual_4
Total Peptides	13164	13882	13470	13915	12336	11497	12272	11971
Yeast Peptides	12534	13238	12842	13277	11761	10808	11704	11402
Biotinylated Yeast Peptides	4630	4885	4758	4846	4342	3804	4309	4203
Human peptides	630	644	628	638	575	689	568	569
Non-biotinylated yeast peptide	7904	8353	8084	8431	7419	7004	7395	7199
F
Contamination	Protein FDR Confidence: Combined	Accession	Description	Fold change (KingFIsher/Manual)	p-value	Sum PEP Score	Coverage [%]	# Peptides	# PSMs	# Unique Peptides	# AAs	MW [kDa]	# Peptides (by Search Engine): Sequest HT	Abundance: KingFisher_1	Abundance: KingFisher_2	Abundance: KingFisher_3	Abundance: KingFisher_4	Abundance: Manual_1	Abundance: Manual_2	Abundance: Manual_3	Abundance: Manual_4
Cont	High	Cont_P13646	Keratin, type I cytoskeletal 13 OS=Homo sapiens OX=9606 GN=KRT13 PE=1 SV=4	0.00575312		54.551	26	10	38	5	458	49.6	10		39852.6			7.75745e+06		6.09682e+06
Cont	High	Cont_P19013	Keratin, type II cytoskeletal 4 OS=Homo sapiens OX=9606 GN=KRT4 PE=1 SV=5	0.0126315	0.194304	45.007	22	10	19	8	520	56.1	10	48350.8	153334	191802	63653.2	6.23239e+06		1.18628e+07
Cont	High	Cont_P35908	Keratin, type II cytoskeletal 2 epidermal OS=Homo sapiens OX=9606 GN=KRT2 PE=1 SV=2	0.123594	0.0346574	222.064	57	30	268	19	639	65.4	30	1.45776e+07	1.16254e+07	1.35017e+07	2.12482e+07	1.36135e+08	1.45078e+08	1.7368e+08	3.82755e+07
Cont	High	Cont_P13645	Keratin, type I cytoskeletal 10 OS=Homo sapiens OX=9606 GN=KRT10 PE=1 SV=6	0.130848	0.0244479	342.337	56	34	404	27	584	58.8	34	3.30684e+07	2.6597e+07	3.60495e+07	4.361e+07	2.887e+08	2.77587e+08	3.82081e+08	1.16413e+08
Cont	High	Cont_P13647	Keratin, type II cytoskeletal 5 OS=Homo sapiens OX=9606 GN=KRT5 PE=1 SV=3	0.312997	0.125647	99.536	30	17	139	9	590	62.3	17	1.37279e+07	1.61373e+06	3.22718e+06	1.93802e+06	1.81049e+07	1.09345e+07	3.04262e+07	6.05198e+06
Cont	High	Cont_P04264	Keratin, type II cytoskeletal 1 OS=Homo sapiens OX=9606 GN=KRT1 PE=1 SV=6	0.390152	0.0740952	426.154	64	46	563	42	644	66	46	3.78247e+08	1.18825e+08	1.4569e+08	1.05825e+08	5.24487e+08	4.20593e+08	7.54284e+08	2.19344e+08
Cont	High	Cont_P35527	Keratin, type I cytoskeletal 9 OS=Homo sapiens OX=9606 GN=KRT9 PE=1 SV=3	0.434715	0.269385	336.322	52	37	296	36	623	62	37	1.89421e+08	2.21133e+07	4.09652e+07	1.51094e+07	1.65328e+08	9.51172e+07	3.09848e+08	4.53044e+07
Cont	High	Cont_P02533	Keratin, type I cytoskeletal 14 OS=Homo sapiens OX=9606 GN=KRT14 PE=1 SV=4	0.592426	0.472944	120.642	33	16	105	6	472	51.5	16	1.69234e+07	1.9093e+06	3.19315e+06	3.43821e+06	1.27941e+07	5.86614e+06	2.23584e+07	1.964e+06
Cont	High	Cont_Q14CN4	Keratin, type II cytoskeletal 72 OS=Homo sapiens OX=9606 GN=KRT72 PE=1 SV=2	1.86562	0.0880146	6.99	8	3	27	2	511	55.8	3	927066	1.5625e+06	1.11248e+06	1.31433e+06	819022	498599
Cont	High	Cont_P08779	Keratin, type I cytoskeletal 16 OS=Homo sapiens OX=9606 GN=KRT16 PE=1 SV=4	5.25737		123.854	38	16	84	7	473	51.2	16	5.10446e+06		190637	351144			357989
Cont	High	Cont_P22629	Streptavidin OS=Streptomyces avidinii OX=1895 PE=1 SV=1	0.233864	0.000192353	301.433	43	12	10162	12	183	18.8	12	5.03764e+09	4.44868e+09	3.59051e+09	5.30091e+09	2.06408e+10	2.19716e+10	1.77107e+10	1.82597e+10
Cont	High	Cont_P68138	Actin, alpha skeletal muscle OS=Bos taurus OX=9913 GN=ACTA1 PE=1 SV=1	0.236136	0.149639	81.587	35	11	172	2	377	42	11	594100	150617	224390	189764	811065	2.67472e+06	888578	533291
Cont	High	Cont_A5D7D1	Alpha-actinin-4 OS=Bos taurus OX=9913 GN=ACTN4 PE=2 SV=1	0.242296	0.0981341	10.219	6	4	4	4	911	104.9	4	160086	181269	286341	86934.7		1028591	818420	365054
Cont	Low	Cont_Q28107	Coagulation factor V OS=Bos taurus OX=9913 GN=F5 PE=1 SV=1	0.289364		1.215	1	1	1	1	2211	248.8	1	163635				396685	634016	782708	448582
Cont	High	Cont_P60712	Actin, cytoplasmic 1 OS=Bos taurus OX=9913 GN=ACTB PE=1 SV=1	0.303355	0.0782131	142.11	54	15	209	5	375	41.7	15	7.17177e+06	6.59234e+06	4.19421e+06	8.26029e+06	1.55851e+07	3.88974e+07	1.54043e+07	1.65422e+07
Cont	High	Cont_P02769	Albumin OS=Bos taurus OX=9913 GN=ALB PE=1 SV=4	0.323752	0.00421896	30.804	15	7	36	6	607	69.2	7	2.71729e+06	1.4649e+06	1.22479e+06	1.48631e+06	6.05636e+06	3.71136e+06	6.4316e+06	5.09259e+06
Cont	Low	Cont_P17697	Clusterin OS=Bos taurus OX=9913 GN=CLU PE=1 SV=1	0.356479	0.115188	0.661	2	1	2	1	439	51.1	1			72576	231864	525166	319934	477929	385005
Cont	High	Cont_Q9BGI3	Peroxiredoxin-2 OS=Bos taurus OX=9913 GN=PRDX2 PE=2 SV=1	0.373912		8.13	14	3	8	1	199	21.9	3		86489.6			231310
Cont	High	Cont_P19120	Heat shock cognate 71 kDa protein OS=Bos taurus OX=9913 GN=HSPA8 PE=1 SV=2	0.385067	0.225781	109.471	27	15	135	7	650	71.2	15	519817	689382	492792	466122	586175	3.06405e+06	742561	1.2377e+06
Cont	High	Cont_P62261	14-3-3 protein epsilon OS=Bos taurus OX=9913 GN=YWHAE PE=2 SV=1	0.472921	0.00821919	33.83	19	5	106	1	255	29.2	5	4.67556e+06	5.32522e+06	3917699	4.55212e+06	1.24018e+07	8.10597e+06	9.48121e+06	9067474
Cont	High	Cont_A1A4R1	Histone H2A type 2-C OS=Bos taurus OX=9913 GN=H2AC20 PE=2 SV=1	0.478459	0.471495	23.22	55	5	59	3	129	14	5	2.13068e+06	682325	543980	522865	1.22588e+06	5.76285e+06	424558	695753
Cont	High	Cont_P62803	Histone H4 OS=Bos taurus OX=9913 PE=1 SV=2	0.488897	0.471154	90.056	60	11	100	9	103	11.4	11	7.48527e+06	4.26433e+06	3.6318e+06	4.06132e+06	4.00379e+06	2.83862e+07	3.41153e+06	3966989
Cont	High	Cont_Q27975	Heat shock 70 kDa protein 1A OS=Bos taurus OX=9913 GN=HSPA1A PE=1 SV=2	0.5811	0.0451748	46.277	21	11	131	6	641	70.2	11	2.19909e+06	1.68562e+06	791106	977980	2.30078e+06	2.72135e+06	2185289	2.52208e+06
Cont	High	Cont_P00761	Trypsin OS=Sus scrofa OX=9823 PE=1 SV=1	0.591366	4.62718e-05	108.562	25	6	420	6	231	24.4	6	5.46999e+08	5.18237e+08	5.07171e+08	6.06658e+08	9.71263e+08	9.47023e+08	9.19088e+08	8.47422e+08
Cont	High	Cont_Q2KJD0	Tubulin beta-5 chain OS=Bos taurus OX=9913 GN=TUBB5 PE=2 SV=1	0.632492	0.0804689	98.048	52	18	91	6	444	49.6	18	1.27973e+07	1.12623e+07	9.35833e+06	1.07969e+07	2.05786e+07	1.87207e+07	2.05985e+07	1.00081e+07
Cont	High	Cont_Q1WEI2	Protease IV OS=Pseudomonas aeruginosa OX=287 GN=prpL PE=4 SV=1	0.639273	0.00375446	528.557	43	22	3085	22	462	48.2	22	4.39962e+09	3.52525e+09	3.88774e+09	3.70564e+09	6.74945e+09	6.1626e+09	6.29102e+09	5.07178e+09
Cont	High	Cont_P68103	Elongation factor 1-alpha 1 OS=Bos taurus OX=9913 GN=EEF1A1 PE=1 SV=1	0.874027	0.490247	217.666	47	25	489	10	462	50.1	25	2.28445e+07	1.59795e+07	1.16964e+07	1.18268e+07	1.98294e+07	2.02291e+07	1.75065e+07	1.37682e+07
Cont	High	Cont_Q5E946	Parkinson disease protein 7 homolog OS=Bos taurus OX=9913 GN=PARK7 PE=2 SV=1	0.936622	0.709305	9.236	13	2	5	2	189	20	2	1.99246e+06	2.42445e+06	1.95186e+06	2.76122e+06	2.80716e+06	1.81358e+06	3.20585e+06	1.92119e+06
Cont	Low	Cont_P20930	Filaggrin OS=Homo sapiens OX=9606 GN=FLG PE=1 SV=3	0.947024	0.74648	0.76	1	1	1	1	4061	434.9	1		834204	805494	1.05499e+06	643068	1.23226e+06	890584	1.02799e+06
Cont	High	Cont_P63103	14-3-3 protein zeta/delta OS=Bos taurus OX=9913 GN=YWHAZ PE=1 SV=1	1.03148	0.952096	21.309	26	5	32	3	245	27.7	5	936456	588019	988750	681850	255576	1.84478e+06	376413	620787
Cont	Low	Cont_Q3SZ57	Alpha-fetoprotein OS=Bos taurus OX=9913 GN=AFP PE=2 SV=1	2.2922	0.329242	1.726	1	1	1	1	610	68.5	1			324616	647874			247877	176384
Cont	High	Cont_Q5E9F5	Transgelin-2 OS=Bos taurus OX=9913 GN=TAGLN2 PE=2 SV=3	2.29819	0.042022	8.867	22	3	6	3	199	22.4	3	714239	615644	475999	310274	231078	218219	226435	245061
Cont	High	Cont_P02538	Keratin, type II cytoskeletal 6A OS=Homo sapiens OX=9606 GN=KRT6A PE=1 SV=3			78.51	21	13	106	2	564	60	13	3.56893e+06		865487
Cont	High	Cont_Q04695	Keratin, type I cytoskeletal 17 OS=Homo sapiens OX=9606 GN=KRT17 PE=1 SV=2			40.328	15	7	48	1	432	48.1	7
Cont	High	Cont_P12035	Keratin, type II cytoskeletal 3 OS=Homo sapiens OX=9606 GN=KRT3 PE=1 SV=3			40.3	10	7	62	1	628	64.4	7
Cont	High	Cont_Q7Z794	Keratin, type II cytoskeletal 1b OS=Homo sapiens OX=9606 GN=KRT77 PE=1 SV=3			19.545	6	3	54	1	578	61.9	3					151073	174719
Cont	High	Cont_P35900	Keratin, type I cytoskeletal 20 OS=Homo sapiens OX=9606 GN=KRT20 PE=1 SV=1			15.054	6	3	10	1	424	48.5	3		541151		259742
Cont	High	Cont_P42899	60S acidic ribosomal protein P2 OS=Bos taurus OX=9913 GN=RPLP2 PE=3 SV=1			12.353	39	2	2	2	115	11.7	2						1.084e+06
Cont	High	Cont_P61603	10 kDa heat shock protein, mitochondrial OS=Bos taurus OX=9913 GN=HSPE1 PE=3 SV=2			12.12	34	4	5	4	102	10.9	4						3.50487e+06
Cont	High	Cont_P05787	Keratin, type II cytoskeletal 8 OS=Homo sapiens OX=9606 GN=KRT8 PE=1 SV=7			10.857	6	3	22	1	483	53.7	3						865693
Cont	High	Cont_P05783	Keratin, type I cytoskeletal 18 OS=Homo sapiens OX=9606 GN=KRT18 PE=1 SV=2			9.916	7	3	10	2	430	48	3						938865
Cont	High	Cont_P15252	Rubber elongation factor protein OS=Hevea brasiliensis OX=3981 PE=1 SV=2			5.883	20	2	3	2	138	14.7	2				971328
Cont	High	Cont_Q5D862	Filaggrin-2 OS=Homo sapiens OX=9606 GN=FLG2 PE=1 SV=1			3.211	0	1	1	1	2391	247.9	1	115377		42103.5
Cont	High	Cont_Q8N1N4	Keratin, type II cytoskeletal 78 OS=Homo sapiens OX=9606 GN=KRT78 PE=1 SV=2			2.711	2	1	2	1	520	56.8	1
Cont	Medium	Cont_Q2HJ57	Coactosin-like protein OS=Bos taurus OX=9913 GN=COTL1 PE=2 SV=3			1.801	6	1	3	1	142	16	1					469544	847190	737149
Cont	Low	Cont_P19534	Cadherin-2 OS=Bos taurus OX=9913 GN=CDH2 PE=2 SV=2			1.041	1	1	3	1	906	99.7	1
Cont	Low	Cont_P69678	Protein CutA OS=Bos taurus OX=9913 GN=CUTA PE=1 SV=1			0.957	8	1	1	1	176	19	1	205865	122903	80208	98035.7
Cont	Low	Cont_P81644	Apolipoprotein A-II OS=Bos taurus OX=9913 GN=APOA2 PE=1 SV=2			0.916	17	1	1	1	100	11.2	1	149929
G
	% SDS	StdDev			% Triton	StdDev
0.01% standard	0.000101017	7.84733e-06		0.01% standard	9.17541e-05	5.73269e-06
Auto 1	1.51855e-05	9.46575e-06		Auto 1	8.18707e-06	6.05127e-06
Auto 2	1.41951e-05	9.38527e-06		Auto 2	4.22287e-06	4.78002e-06
Auto 3	1.25117e-05	5.20713e-06		Auto 3	9.2761e-06	4.84636e-06
Auto 4	6.17361e-06	5.87501e-06		Auto 4	6.40658e-06	5.21161e-06
Manual 1	2.26135e-05	1.50978e-06		Manual 1	5.76885e-06	5.41522e-06
Manual 2	1.97669e-05	6.73704e-06		Manual 2	1.1111e-05	7.24257e-06
Manual 3	9.45749e-06	6.72363e-06		Manual 3	2.29529e-05	4.94576e-06
Manual 4	1.06536e-05	4.0394e-06		Manual 4	8.02395e-06	6.39685e-06
0.01% SDS standard	0.000101017	7.84733e-06		0.01% Triton standard	9.17541e-05	5.73269e-06
average Auto	1.20165e-05	4.04861e-06		average Auto	7.02316e-06	2.20999e-06
average Manual	1.56229e-05	6.55099e-06		average Manual	1.19642e-05	7.64609e-06
	LOD	8.69551e-06			LOD	1.51951e-05

## Sheet: Fig 4
C
	TOM20_1	TOM20_2	STOML2_1	STOML2_2	LAMP1_1	LAMP1_2	NegCtrl 1	NegCtrl 2
Protein ID	1606	1597	848	824	1855	1684	179	106
	TOM20_1	TOM20_2	STOML2_1	STOML2_2	LAMP1_1	LAMP1_2
Biotinylated peptide ID	744	804	505	498	915	869
F
STOML2 vs. TOM20											LAMP1 vs. TOM20
Median	4.50179	10	2.78333	-10	-10	-10	-10	-10	-10		Median	9.36565	10	10	0.372968	-1.16313	-7.25178	0.471154	0.381603	0.830535	0.252245
LOG2	IMM	Matrix	Mito	OMM	Cytoplasm	Lysosome	Golgi	ER	Nucleus		LOG2	Lysosome	Late endosome	Endosome	Cytoplasm	Mito	OMM	Golgi	ER	Cell membrane	Nucleus
1	-5.68464	-0.967812	-8.22795	-8.22795		-5.02835						-3.49089	-1.13784	-3.16098	-9.29385	-7.77112	-7.77112	-4.98691	-4.98691	-3.07589	-9.29385
1	-1.67838	-0.926028	-7.80211	-7.80211		-4.95393	-6.44679	-6.44679				-2.51691	-0.651087	-1.60504	-5.74381	-7.65482	-7.65482	-3.74818	-4.42487	-1.72173	-6.84873
1	-1.61051	-0.872039	-7.07657	-7.07657		-4.77044	-5.50502	-5.50502				-1.60504	-0.56124	-1.18544	-4.98691	-6.84873	-6.84873	-3.68843	-4.05693	-1.25738	-4.79581
1	-1.59181	-0.647928	-6.65632	-6.65632	-7.01049	-4.43903	-5.24215	-5.24215	-7.80211			-1.45005	-0.432625	-1.06273	-3.93921	-6.53338	-6.53338	-3.66452	-3.86508	-1.11983	-4.68048
1	-1.41489	-0.558528	-6.462	-6.462	-6.3942	-4.33202	-5.08807	-5.1403	-6.3942			-1.28566	0.132418	-0.798795	-3.68843	-6.31796	-6.31796	-2.39038	-3.74818	-1.09419	-4.38347
1	-1.25309	-0.555411	-6.44679	-5.9944	-5.97782	-4.20675	-4.9039	-4.9039	-5.97782			-0.815663	0.221803	-0.639382	-3.2866	-5.46272	-5.46272	-1.60504	-3.68843	-0.91968	-3.96539
1	-1.18566	-0.507551	-5.9944	-5.22221	-5.40724	-3.55927	-4.8295	-4.33202	-5.95511			-0.651087	0.282474	-0.353171	-3.27342	-5.3901	-4.98691	-1.32523	-3.66452	-0.89923	-3.93921
1	-0.647928	-0.279292	-5.68464	-4.95745	-5.33294	-3.50459	-4.20675	-4.20952	-5.33294			-0.620027	0.361067	-0.342332	-3.16098	-5.20755	-4.79581	-1.2393	-2.99049	-0.682325	-3.82027
1	-0.621631	-0.193573	-5.22221	-4.5637	-5.08807	-1.79924	-4.08552	-4.20675	-4.99731			-0.61145	1.09155	-0.337385	-2.96744	-5.0454	-4.16554	-1.21082	-2.81412	-0.569	-3.55017
1	-0.288394	0.0453124	-5.02835	-4.52131	-5.01756	-1.69959	-3.98323	-3.95017	-4.74177			-0.56124	1.12185	-0.334157	-2.78149	-4.98691	-3.56621	-0.798795	-2.31507	-0.467017	-3.30089
1	-0.0985895	0.0899145	-4.95745	-4.33202	-4.95393	-0.595918	-3.72743	-3.82248	-4.73864			-0.344646	1.12325	-0.20728	-2.74644	-4.79581	-3.0186	-0.795762	-1.76461	-0.418556	-3.2866
1	0.0158149	0.590252	-4.57122	-3.93815	-4.85836	-0.444583	-3.66628	-3.81648	-4.66217			-0.290111	1.7532	-0.116538	-2.67241	-4.38347	-1.60504	-0.789854	-1.73648	-0.380916	-3.28311
1	0.109837	0.65242	-4.5637	-3.83868	-4.8295	-0.419785	-3.60589	-3.75317	-4.5851			-0.141348	2.01063	-0.0869172	-2.60561	-4.2566	-1.60069	-0.772583	-1.60504	-0.368806	-3.27342
1	0.499372	0.669723	-4.52131	-2.44195	-4.7902	-0.250234	-3.56918	-3.66628	-4.43657			0.0853849	2.20446	0.0317711	-2.55255	-4.16554	-1.40996	-0.751706	-1.30196	-0.334157	-3.14178
1	1.6037	0.785937	-4.33202	-1.9144	-4.77044	-0.205051	-3.50459	-3.50459	-4.41628			0.16967	2.25651	0.170658	-2.52768	-3.85686	-0.412019	-0.662623	-1.24022	-0.296723	-3.09128
1	1.77092	0.926066	-3.99606	-1.80468	-4.74177	-10	-3.49621	-3.40371	-4.30147			0.221803	3.22385	0.173006	-2.4592	-3.82475	-0.375085	-0.640224	-1.2393	-0.29086	-3.02603
1	2.03794	0.929046	-3.93815	-1.66508	-4.67984	-10	-3.21846	-3.08388	-4.25541			0.93109	3.22931	0.377668	-2.43224	-3.56621	-0.204244	-0.620027	-1.21082	-0.257635	-2.90812
1	2.61826	1.00297	-3.83868	-0.857884	-4.66217	-10	-2.88925	-3.08014	-4.09472			0.934057	3.58573	0.377761	-2.39038	-3.40812	-0.188321	-0.569	-1.13293	-0.254457	-2.81124
1	2.77622	1.14597	-3.68467	10	-4.65721	-10	-2.77239	-2.88239	-4.07051			1.27612	4.37319	0.392664	-2.33545	-3.02117	0.116982	-0.56124	-0.971651	-0.191427	-2.74644
1	2.89824	1.21671	-3.56437	10	-4.64763	-10	-2.65108	-2.77239	-3.99914			1.37735	4.82429	0.397973	-2.31507	-3.0186	0.35542	-0.529629	-0.970058	-0.151422	-1.99914
1	2.95922	1.44179	-3.51098	-10	-4.53746	-10	-2.34627	-2.71691	-3.90567			1.49373	5.60987	0.49315	-2.19287	-3.01742	0.417908	-0.524167	-0.900914	-0.119362	-1.99137
1	3.03734	1.45662	-2.64907	-10	-4.36691	-10	-2.15993	-2.65108	-3.75317			1.84859	6.26041	0.93109	-2.1656	-2.74774	0.436667	-0.504658	-0.795762	-0.0409601	-1.97319
1	3.39218	1.95208	-2.64315	-10	-4.3379	-10	-1.83287	-2.43333	-3.74978			1.97626	8.7313	0.962473	-2.13791	-2.22822	1.36818	-0.435035	-0.662623	0.00374933	-1.95212
1	3.62543	2.41262	-2.50288	-10	-4.20123	-10	-1.8229	-2.3039	-3.6175			2.25651	10	1.04802	-2.09224	-2.00129	1.97041	-0.368806	-0.620027	0.119454	-1.90774
1	3.67512	2.67339	-2.44195	-10	-4.12568	-10	-1.25434	-2.17867	-3.54874			3.11743	10	1.1291	-2.0719	-1.95212	3.22931	-0.353171	-0.584794	0.163553	-1.87926
1	3.75083	2.78333	-2.22437	-10	-4.12318	-10	-0.856598	-2.01826	-3.50459			3.22385	10	1.23333	-2.03305	-1.83855	4.95954	-0.347233	-0.56124	0.197471	-1.87432
1	3.88213	2.85117	-2.21017	-10	-4.09472	-10	-0.83167	-1.95243	-3.48211			3.22931	10	1.44392	-2.02946	-1.8053	10	-0.344646	-0.549254	0.509408	-1.86151
1	4.06631	3.23746	-2.19279	-10	-4.07051	-10	-0.755411	-1.83759	-3.46753			3.38641	10	1.45379	-2.00377	-1.77715	10	-0.286943	-0.504658	0.596102	-1.85299
1	4.20887	3.349	-1.96803	-10	-3.99914	-10	-0.639533	-1.8229	-3.36463			3.58573	10	1.53971	-1.99914	-1.7139	10	-0.260368	-0.503242	0.747016	-1.8274
1	4.2587	3.62543	-1.9144	-10	-3.98323	-10	-0.39659	-1.73242	-3.35186			4.82429	10	1.80155	-1.97319	-1.60504	10	-0.163909	-0.438579	0.75606	-1.8053
1	4.26761	3.66965	-1.87449	-10	-3.94027	-10	-0.205051	-1.63025	-3.32036			5.54472	10	1.83688	-1.91321	-1.60069	10	-0.147564	-0.435035	0.905009	-1.79137
1	4.35361	3.87969	-1.83239	-10	-3.92364	-10	-8.14576e-05	-1.56109	-3.31516			5.60987	10	2.12117	-1.83438	-1.55583	-10	-0.121678	-0.398481	0.963578	-1.78951
1	4.64998	3.97899	-1.8322	-10	-3.90567	-10	0.104587	-1.54586	-3.31384			6.26041	10	2.15238	-1.8053	-1.45005	-10	0.00969339	-0.355418	0.968901	-1.76101
1	4.66244	4.06343	-1.80468	-10	-3.86452	-10	0.685373	-1.51522	-3.29295			6.6982	10	2.21349	-1.6739	-1.44233	-10	0.027005	-0.353171	1.05023	-1.73648
1	4.85604	4.20887	-1.72076	-10	-3.82248	-10	2.03972	-1.3424	-3.25938			6.72123	10	2.99464	-1.64569	-1.40996	-10	0.02705	-0.344646	1.1983	-1.73555
1	5.0967	4.35361	-1.67838	-10	-3.75317	-10	7.98644	-1.25434	-3.214			6.81764	10	3.0399	-1.60311	-1.3956	-10	0.0472166	-0.316066	1.25378	-1.71988
1	5.1471	5.08076	-1.66508	-10	-3.72743	-10	10	-1.13395	-3.1903			8.21006	10	3.23696	-1.60294	-1.17904	-10	0.0500846	-0.270632	1.25681	-1.70715
1	5.25336	5.09863	-1.61051	-10	-3.7078	-10	10	-1.09457	-3.17198			8.7313	10	3.26757	-1.56042	-1.17726	-10	0.106055	-0.258767	1.34463	-1.69188
1	7.22715	5.12092	-1.59181	-10	-3.68467	-10	10	-0.909325	-3.14519			-0.344646	10	3.30188	-1.54726	-1.17607	-10	0.116982	-0.208002	1.37821	-1.68037
1	10	6.1442	-1.46177	-10	-3.66628	-10	10	-0.908345	-3.14031			2.25651	10	3.34525	-1.45005	-1.16313	-10	0.120862	-0.188321	1.44392	-1.65223
1	10	7.48477	-1.41489	-10	-3.63567	-10	10	-0.83167	-3.1394			10	10	3.38465	-1.44233	-1.11944	-10	0.124818	-0.185148	1.45379	-1.64569
1	10	7.54464	-1.26563	-10	-3.5696	-10	10	-0.755411	-3.09288			10	10	4.13118	-1.41619	-1.11558	-10	0.126479	-0.177772	1.50926	-1.63715
1	10	10	-1.25309	-10	-3.53796	-10	10	-0.712196	-3.08443			10	10	4.25492	-1.40898	-1.10268	-10	0.173006	-0.163909	1.53971	-1.55225
1	10	10	-1.22535	-10	-3.49636	-10	10	-0.639533	-3.08014			10	10	4.35488	-1.40816	-1.04251	-10	0.190683	-0.156335	1.60735	-1.54726
1	10	10	-1.20404	-10	-3.48522	-10	10	-0.595918	-3.05302			10	10	6.11227	-1.34557	-0.973481	-10	0.282169	-0.148231	1.66448	-1.46992
1	10	10	-1.18566	-10	-3.44653	-10	10	-0.444583	-3.03518			10	10	6.72123	-1.32553	-0.965148	-10	0.327386	-0.147564	1.76548	-1.45638
1	10	10	-1.11642	-10	-3.40146	-10	-10	-0.375398	-3.03313			10	10	7.08077	-1.32523	-0.949334	-10	0.349597	-0.074004	1.8145	-1.45005
1	10	10	-1.09359	-10	-3.35747	-10	-10	-0.253389	-3.0265			10	10	8.21006	-1.28566	-0.905996	-10	0.361067	-0.00981193	2.12117	-1.41619
1	10	10	-0.967812	-10	-3.35186	-10	-10	-0.249792	-3.01411			10	10	10	-1.25452	-0.869265	-10	0.377668	0.0284675	2.71817	-1.40898
1	10	10	-0.933722	-10	-3.34668	-10	-10	-0.0722352	-3.00834			10	10	10	-1.25419	-0.835879	-10	0.392664	0.0472166	2.74272	-1.36334
1	10	10	-0.926028	-10	-3.31516	-10	-10	0.0838534	-2.99158			10	10	10	-1.25357	-0.798795	-10	0.404339	0.0500846	2.81486	-1.35477
1	10	10	-0.917557	-10	-3.31384	-10	-10	0.183193	-2.96803			10	10	10	-1.25134	-0.791427	-10	0.471154	0.0892444	2.84867	-1.34557
1	10	10	-0.908345	-10	-3.25938		-10	0.601195	-2.9613			10	10	10	-1.24837	-0.776824	-10	0.496198	0.106055	2.9795	-1.32553
1	10	10	-0.891654	-10	-3.2333		-10	0.685373	-2.95118			10	10	10	-1.24187	-0.722274	-10	0.631747	0.120862	2.99464	-1.3196
1	10	10	-0.881006	-10	-3.1746		-10	2.37129	-2.9393			10	10	10	-1.23405	-0.659851	-10	0.633223	0.124818	3.34525	-1.31539
1	10	10	-0.872039		-3.16978		-10	2.53925	-2.93909			10	10	10	-1.23213	-0.619366	-10	0.690474	0.126479	3.38465	-1.28566
1	10	10	-0.857884		-3.14519		-10	10	-2.88239			10	10	10	-1.21079	-0.486906	-10	0.705945	0.190683	3.86747	-1.26396
1	10	10	-0.798752		-3.14368		-10	10	-2.83435			10	10	10	-1.19757	-0.46657	-10	0.725987	0.244997	4.67485	-1.25738
1	10	10	-0.760226		-3.13501		-10	10	-2.82463			10	10	10	-1.19221	-0.437799		0.775818	0.261686	5.5236	-1.25452
1	10	10	-0.758053		-3.08443		-10	10	-2.73793			10	10	10	-1.17777	-0.435035		0.85873	0.280928	5.54472	-1.25134
1	10	10	-0.743578		-3.08014		-10	10	-2.73374			10	10	10	-1.17063	-0.43134		0.93109	0.282169		-1.24837
1	10	10	-0.715392		-3.05835		-10	10	-2.71691			10	10	10	-1.1679	-0.412019		0.9695	0.349597		-1.23213
1	10	10	-0.647928		-3.05302		-10	10	-2.67743			10	10	10	-1.15467	-0.398481		1.0218	0.361067		-1.22265
1	10	10	-0.621631		-3.03518		-10	10	-2.67175			10	-10	10	-1.14343	-0.375085		1.0227	0.361602		-1.19221
1	10	10	-0.614378		-3.0265		-10	10	-2.65108			10		10	-1.13784	-0.366591		1.04802	0.401604		-1.17904
1	10	10	-0.558528		-3.01411		-10	10	-2.64907			10		10	-1.13666	-0.265445		1.12185	0.410015		-1.17777
1	10	10	-0.555411		-3.00834		-10	10	-2.61435			10		10	-1.13579	-0.26273		1.1291	0.451937		-1.17063
1	10	10	-0.507551		-2.99158		-10	10	-2.60134			10		10	-1.10855	-0.204244		1.2042	0.461768		-1.13906
1	10	10	-0.288394		-2.96803		-10	10	-2.59645			10		10	-1.09518	-0.188321		1.23333	0.4647		-1.13784
1	10	10	-0.279292		-2.96532		-10	10	-2.57602			10		10	-1.08787	-0.148726		1.3187	0.522935		-1.13579
1	10	10	-0.193573		-2.93909		-10	10	-2.57136			10		10	-1.06273	-0.144759		1.36257	0.550211		-1.11633
1	10	10	-0.0985895		-2.87016		-10	-10	-2.56205			10		10	-1.04757	-0.0756845		1.44392	0.573722		-1.10855
1	10	10	-0.0306757		-2.82463		-10	-10	-2.55767			10		10	-1.03975	-0.0631793		1.47564	0.59827		-1.09083
1	10	10	0.0158149		-2.78888		-10	-10	-2.5491			10		10	-1.03738	-0.0148001		1.50187	0.634272		-1.06273
1	10	10	0.0453124		-2.77757		-10	-10	-2.54356			10		10	-1.02853	0.0892444		1.50926	0.645293		-1.04757
1	10	10	0.0899145		-2.77341		-10	-10	-2.50288			10		10	-1.0285	0.0983995		1.52528	0.687907		-1.03975
1	-10	10	0.109837		-2.76239		-10	-10	-2.46541			10		10	-0.991236	0.116982		1.64519	0.705945		-1.02853
1	-10	10	0.400092		-2.74243		-10	-10	-2.46051			10		10	-0.971651	0.157852		1.67614	0.712978		-1.0285
1	-10	10	0.469781		-2.70633		-10	-10	-2.44934			10		10	-0.964323	0.178645		1.68833	0.796741		-0.994505
1	-10	10	0.499372		-2.67743		-10	-10	-2.38819			10		10	-0.963797	0.221803		1.75497	0.819527		-0.980013
1	-10	10	0.590252		-2.64907		-10	-10	-2.37396			10		10	-0.963126	0.236251		1.81392	0.884568		-0.964323
1	-10	10	0.601195		-2.63167		-10	-10	-2.3601			10		10	-0.931324	0.257643		1.8165	0.909003		-0.963126
1	-10	10	0.65242		-2.61435		-10	-10	-2.33726			10		10	-0.918901	0.260728		1.83688	0.934057		-0.950131
1	-10	10	0.669723		-2.60529		-10	-10	-2.33388			10		10	-0.916108	0.282845		1.94302	0.962219		-0.928318
1	-10	10	0.701865		-2.58942		-10	-10	-2.31828			10		10	-0.895268	0.29104		2.15238	1.01781		-0.918901
1	-10	10	0.712783		-2.57136		-10	-10	-2.31292			10		10	-0.892369	0.327386		2.48457	1.0227		-0.916108
1	-10	10	0.785937		-2.56205		-10	-10	-2.29431			10		10	-0.892054	0.342014		2.8583	1.05115		-0.90944
1	-10	10	0.926066		-2.56144		-10	-10	-2.24387			10		10	-0.874157	0.348763		3.23696	1.12592		-0.892054
1		10	0.929046		-2.55378		-10	-10	-2.22437			10		10	-0.87072	0.350348		3.56367	1.1291		-0.874157
1		10	0.941989		-2.54356		-10	-10	-2.21017			10		10	-0.828239	0.354842		3.62193	1.14385		-0.87072
1		-10	1.00297		-2.52748		-10	-10	-2.20534			-10		10	-0.789854	0.35542		3.85301	1.26494		-0.866135
1		-10	1.01437		-2.49672		-10	-10	-2.20331			-10		10	-0.775539	0.359325		4.00073	1.27612		-0.857975
1		-10	1.14597		-2.49285		-10	-10	-2.18178			-10		10	-0.772583	0.359438		4.13118	1.37735		-0.85787
1		-10	1.21671		-2.48954		-10	-10	-2.16565			-10		10	-0.770285	0.359792		4.63255	1.38448		-0.852883
1			1.44179		-2.46051		-10	-10	-2.14724			-10		10	-0.769932	0.377761		4.79121	1.4178		-0.844383
1			1.45662		-2.44934		-10	-10	-2.14344			-10		10	-0.769711	0.38328		5.09393	1.47564		-0.836956
1			1.6037		-2.44147		-10	-10	-2.12531			-10		10	-0.763487	0.39962		5.47499	1.59932		-0.832879
1			1.61261		-2.43333		-10	-10	-2.10019			-10		10	-0.719777	0.409528		5.5236	1.63599		-0.817698
1			1.7144		-2.42995		-10	-10	-2.08654			-10		10	-0.707436	0.417908		5.54472	1.68833		-0.791427
1			1.77092		-2.37396		-10	-10	-2.07272			-10		10	-0.70472	0.421995		6.19601	1.71438		-0.776824
1			1.80972		-2.3601		-10	-10	-2.05481					10	-0.669037	0.436667		6.72123	1.71923		-0.775539
1			1.95208		-2.33726		-10	-10	-2.04648					10	-0.660282	0.455815		7.63141	1.8145		-0.774526
1			2.03326		-2.33388		-10	-10	-2.03893					10	-0.6455	0.48227		8.21006	1.8165		-0.769711
1			2.03794		-2.33125		-10	-10	-2.01826					10	-0.631517	0.495333			1.90823		-0.734395
1			2.33866		-2.31292		-10	-10	-2.00927					10	-0.624932	0.513499			1.97041		-0.72487
1			2.33971		-2.31226		-10	-10	-1.96803					10	-0.624099	0.528558			2.0467		-0.707436
1			2.36229		-2.3039		-10	-10	-1.96584					10	-0.601677	0.574318			2.22274		-0.70472
1			2.41262		-2.26958		-10	-10	-1.92128					10	-0.588806	0.579394			2.33246		-0.699193
1			2.42872		-2.26261		-10	-10	-1.9157					10	-0.585526	0.583057			2.40728		-0.673847
1			2.53925		-2.25939		-10	-10	-1.89817					10	-0.569342	0.644543			2.48457		-0.651448
1			2.61674		-2.24402		-10	-10	-1.89721					10	-0.565037	0.669719			2.51377		-0.631783
1			2.61826		-2.21543		-10	-10	-1.88924					10	-0.552185	0.747242			2.66657		-0.631517
1			2.67339		-2.20534		-10	-10	-1.87449					10	-0.545899	0.755918			2.74272		-0.627085
1			2.77622		-2.20331		-10	-10	-1.87097					10	-0.534475	0.765852			2.83285		-0.624099
1			2.78333		-2.17765		-10	-10	-1.85257					10	-0.529629	0.799545			3.22931		-0.620027
1			2.85117		-2.16096		-10	-10	-1.83878					10	-0.524167	0.860052			3.43105		-0.617082
1			2.86809		-2.14724		-10	-10	-1.83759					10	-0.500711	0.897829			3.44584		-0.594132
1			2.88285		-2.12531		-10	-10	-1.83239					10	-0.49985	0.921443			3.69757		-0.587933
1			2.89824		-2.05481		-10	-10	-1.81551					10	-0.489817	0.958108			3.7905		-0.584794
1			2.95922		-2.03893		-10	-10	-1.81161					10	-0.482245	1.04262			4.13118		-0.569121
1			3.03734		-2.03475		-10	-10	-1.79367					10	-0.46694	1.0759			4.48662		-0.547549
1			3.23746		-2.01826		-10	-10	-1.7692					10	-0.452945	1.0773			4.76345		-0.536434
1			3.31617		-2.00927		-10	-10	-1.73242					10	-0.438579	1.15183			4.79121		-0.511188
1			3.349		-2.00159		-10	-10	-1.72371					10	-0.435957	1.19301			4.95954		-0.504658
1			3.39218		-1.99702		-10	-10	-1.71118					10	-0.413994	1.25724			5.54472		-0.497949
1			3.40053		-1.98778		-10	-10	-1.69959					10	-0.412161	1.36818			5.97295		-0.491249
1			3.40995		-1.97032		-10	-10	-1.69708					10	-0.406048	1.41611			6.84711		-0.488305
1			3.62543		-1.96803		-10	-10	-1.68322					10	-0.387246	1.44402			8.21006		-0.463969
1			3.66965		-1.96116		-10	-10	-1.67949					10	-0.379223	1.54086					-0.437799
1			3.67512		-1.95243		-10	-10	-1.67338					10	-0.364712	1.54569					-0.436415
1			3.75083		-1.92553		-10	-10	-1.66402					10	-0.364084	1.57688					-0.431697
1			3.87969		-1.92128		-10	-10	-1.66126					10	-0.355907	1.67899					-0.429206
1			3.88213		-1.9157		-10	-10	-1.65339					10	-0.355418	1.68219					-0.423888
1			3.97899		-1.90646		-10	-10	-1.64649					10	-0.325951	1.83547					-0.412161
1			4.06342		-1.89817		-10	-10	-1.64274					10	-0.31777	1.84057					-0.403244
1			4.06343		-1.89721		-10	-10	-1.6419					10	-0.305563	1.84542					-0.370311
1			4.06631		-1.83878		-10	-10	-1.61517					10	-0.304902	1.95446					-0.366572
1			4.15556		-1.83759		-10	-10	-1.61072					10	-0.297956	1.97041					-0.355418
1			4.20887		-1.83287		-10	-10	-1.60225					10	-0.292983	2.33246					-0.353171
1			4.2587		-1.83239		-10	-10	-1.58438					10	-0.290216	2.40732					-0.343569
1			4.26761		-1.8229		-10	-10	-1.56958					10	-0.289667	3.22931					-0.337385
1			4.35361		-1.81551		-10	-10	-1.56109					10	-0.27227	3.98069					-0.332672
1			4.61751		-1.79378		-10	-10	-1.52372					10	-0.265445	4.09893					-0.325951
1			4.62503		-1.78466		-10	-10	-1.51522					10	-0.259945	4.95954					-0.31777
1			4.64998		-1.7637		-10	-10	-1.50672					10	-0.259651	10					-0.317446
1			4.66244		-1.75975		-10	-10	-1.49094					10	-0.253065	10					-0.304902
1			4.85604		-1.75801		-10	-10	-1.4711					10	-0.238499	10					-0.297956
1			5.07644		-1.73242		-10	-10	-1.46186					10	-0.215876	10					-0.289667
1			5.08076		-1.72932		-10	-10	-1.4492					10	-0.208002	10					-0.287796
1			5.0967		-1.70712		-10	-10	-1.44789					10	-0.202389	10					-0.278447
1			5.09863		-1.68266		-10	-10	-1.42766					10	-0.192009	10					-0.249841
1			5.12092		-1.66459		-10	-10	-1.39322					10	-0.190782	10					-0.229742
1			5.1471		-1.66126			-10	-1.3881					10	-0.187422	10					-0.215876
1			5.25336		-1.65339			-10	-1.3846					10	-0.183118	10					-0.204378
1			5.30624		-1.65336			-10	-1.38389					10	-0.182326	10					-0.190472
1			5.31777		-1.64843			-10	-1.37461					10	-0.175859	10					-0.188884
1			6.01759		-1.64649			-10	-1.36734					10	-0.173323	10					-0.182326
1			6.1442		-1.6419			-10	-1.3671					10	-0.16692	10					-0.175859
1			7.22715		-1.62759			-10	-1.35071					10	-0.16081	10					-0.162658
1			7.48477		-1.6178			-10	-1.34351					-10	-0.148656	10					-0.158371
1			7.54464		-1.52372			-10	-1.2774					-10	-0.146047	10					-0.152319
1			7.98644		-1.49094			-10	-1.27215					-10	-0.144691	10					-0.148656
1			10		-1.48828			-10	-1.25309					-10	-0.144263	10					-0.136225
1			10		-1.47052			-10	-1.2444					-10	-0.141743	10					-0.133593
1			10		-1.45723			-10	-1.22535					-10	-0.141348	10					-0.126379
1			10		-1.44236			-10	-1.22445					-10	-0.138447	10					-0.116538
1			10		-1.42766			-10	-1.21112					-10	-0.136225	10					-0.110872
1			10		-1.38984			-10	-1.18481					-10	-0.133709	10					-0.108091
1			10		-1.38389			-10	-1.18067					-10	-0.133593	10					-0.0993692
1			10		-1.35835			-10	-1.1731						-0.129503	10					-0.0943615
1			10		-1.34589			-10	-1.17156						-0.126379	10					-0.0910139
1			10		-1.34436			-10	-1.16583						-0.115331	10					-0.0824166
1			10		-1.3424			-10	-1.11939						-0.110872	10					-0.0806283
1			10		-1.29137			-10	-1.1146						-0.108091	10					-0.0748547
1			10		-1.27215			-10	-1.10775						-0.0894481	10					-0.0713092
1			10		-1.26489			-10	-1.10235						-0.0801597	10					-0.0703843
1			10		-1.25434			-10	-1.10079						-0.0703843	10					-0.0687481
1			10		-1.25056			-10	-1.08726						-0.0687481	10					-0.0631793
1			10		-1.22445			-10	-1.08641						-0.0571734	10					-0.0543631
1			10		-1.20485			-10	-1.08361						-0.0567958	10					-0.054018
1			10		-1.17338			-10	-1.04994						-0.054018	10					-0.0531002
1			10		-1.14224			-10	-1.0364						-0.0534372	10					-0.0520085
1			10		-1.13395			-10	-1.00958						-0.0533184	10					-0.0515953
1			10		-1.11939			-10	-0.983153						-0.0531002	10					-0.0509778
1			10		-1.1146			-10	-0.977076						-0.0523737	10					-0.0451668
1			10		-1.10079			-10	-0.975242						-0.0515953	10					-0.0439092
1			10		-1.09457			-10	-0.967812						-0.0494404	10					-0.0409601
1			10		-1.08641			-10	-0.967408						-0.0288454	10					-0.0276585
1			10		-1.04994			-10	-0.963655						-0.0276585	10					-0.0188265
1			10		-1.00958			-10	-0.958322						-0.0226078	10					-0.016356
1			10		-0.996243			-10	-0.951454						-0.0168512	10					-0.0148001
1			10		-0.977076			-10	-0.944407						-0.0131189	10					-0.0131189
1			10		-0.962849			-10	-0.933722						-0.0043388	10					-0.0043388
1			10		-0.933722			-10	-0.926398						-0.00337878	10					-0.00337878
1			10		-0.926398			-10	-0.909325						0.00921948	10					0.0111697
1			10		-0.909325			-10	-0.904616						0.00969339	10					0.0128621
1			10		-0.904616			-10	-0.881006						0.0110333	10					0.0137931
1			10		-0.894955			-10	-0.874339						0.0111697	-10					0.0269491
1			10		-0.874339			-10	-0.868446						0.0128621	-10					0.0284675
1			10		-0.86158			-10	-0.860482						0.0177896	-10					0.0482736
1			10		-0.856598			-10	-0.849513						0.0212212	-10					0.0630232
1			10		-0.810155			-10	-0.816456						0.0269491	-10					0.0639748
1			10		-0.766286			-10	-0.81409						0.0283817	-10					0.0703139
1			10		-0.760226			-10	-0.812657						0.0284675	-10					0.0781783
1			10		-0.740876			-10	-0.798752						0.0317711	-10					0.0800536
1			10		-0.73457			-10	-0.760226						0.037479	-10					0.0831999
1			10		-0.728682			-10	-0.758053						0.0386109	-10					0.0832469
1			10		-0.708672			-10	-0.755411						0.0452205	-10					0.089945
1			10		-0.708163				-0.740876						0.0472166	-10					0.103049
1			10		-0.696412				-0.732039						0.0561375	-10					0.106055
1			10		-0.668958				-0.726492						0.0630232	-10					0.110406
1			10		-0.639533				-0.709357						0.0639748	-10					0.118024
1			10		-0.638865				-0.708672						0.0645508	-10					0.12156
1			10		-0.614378				-0.696412						0.0697462	-10					0.132418
1			10		-0.604527				-0.678168						0.0703139	-10					0.133435
1			10		-0.596145				-0.639533						0.0785884	-10					0.138705
1			10		-0.57409				-0.596145						0.0818174	-10					0.141931
1			10		-0.554233				-0.595918						0.0832469	-10					0.142149
1			10		-0.540621				-0.55931						0.116343	-10					0.143451
1			10		-0.53363				-0.53363						0.116982	-10					0.149135
1			10		-0.493792				-0.515409						0.124818	-10					0.151581
1			10		-0.489007				-0.489007						0.126479	-10					0.157852
1			10		-0.430103				-0.444583						0.132418	-10					0.163553
1			10		-0.424752				-0.301554						0.13975	-10					0.167993
1			10		-0.419785				-0.27556						0.141503	-10					0.16967
1			10		-0.39659				-0.260668						0.141931	-10					0.171141
1			10		-0.375398				-0.236429						0.151455	-10					0.178645
1			10		-0.348904				-0.191945						0.151581	-10					0.191473
1			10		-0.286278				-0.178491						0.152946	-10					0.195205
1			10		-0.236429				-0.150148						0.157852	-10					0.199914
1			10		-0.191945				-0.116195						0.16146	-10					0.211925
1			10		-0.154026				-0.0722352						0.162844	-10					0.211952
1			10		-0.128486				-0.0316366						0.164795	-10					0.236251
1			10		-0.0722352				0.00436414						0.167993	-10					0.243797
1			10		-0.0431461				0.109815						0.171141	-10					0.244997
1			10		0.0832448				0.111836						0.17771	-10					0.247785
1			10		0.109815				0.183193						0.178645	-10					0.248785
1			10		0.274044				0.24956						0.191473	-10					0.252245
1			10		0.368485				0.257839						0.199914	-10					0.259242
1			10		0.440343				0.349346						0.214342	-10					0.259352
1			10		0.601195				0.368485						0.216007	-10					0.264815
1			10		0.656744				0.656744						0.219466	-10					0.269603
1			10		0.683808				0.873453						0.226282	-10					0.272708
1			10		0.912242				0.941989						0.228082	-10					0.279283
1			10		1.14597				1.32117						0.228343	-10					0.279895
1			10		1.42416				1.3434						0.24357	-10					0.282821
1			10		1.46581				1.61261						0.243797	-10					0.282845
1			10		1.50481				1.7144						0.252245	-10					0.292418
1			10		1.55196				2.41262						0.254042	-10					0.292866
1			10		2.03326				2.42872						0.255592	-10					0.293886
1			10		2.13373				3.74238						0.259352	-10					0.300944
1			10		2.42872				4.20887						0.260072	-10					0.306585
1			10		2.85117				10						0.261686	-10					0.31531
1			10		3.349				10						0.263447	-10					0.316423
1			10		3.40995				10						0.269603	-10					0.31826
1			10		3.72607				10						0.276905	-10					0.321933
1			10		10				10						0.279283	-10					0.327218
1			10		10				10						0.280928	-10					0.329957
1			10		10				10						0.282606	-10					0.333987
1			10		10				10						0.282821	-10					0.337724
1			10		10				10						0.282845	-10					0.342014
1			10		10				10						0.286985	-10					0.343011
1			10		10				10						0.288364	-10					0.346539
1			10		10				10						0.291112	-10					0.346561
1			10		10				10						0.292866	-10					0.348763
1			10		10				10						0.293886	-10					0.349597
1			10		10				10						0.300339	-10					0.354842
1			10		10				10						0.307234	-10					0.355317
1			10		10				10						0.308419	-10					0.358318
1			10		10				10						0.310588	-10					0.3589
1			10		10				10						0.31826	-10					0.359438
1			10		10				10						0.318797	-10					0.359792
1			10		10				10						0.321576	-10					0.360966
1			10		10				10						0.327386	-10					0.361602
1			10		10				10						0.329957	-10					0.364658
1			10		10				10						0.333987	-10					0.3649
1			10		10				10						0.335278	-10					0.367511
1			10		10				10						0.337529	-10					0.373243
1			10		10				10						0.339167	-10					0.374616
1			10		10				10						0.353576	-10					0.375769
1			10		10				10						0.354842	-10					0.381628
1			10		10				10						0.355317	-10					0.384046
1			10		10				10						0.358318	-10					0.385123
1			10		10				10						0.359325	-10					0.401042
1			10		10				10						0.359792	-10					0.401604
1			10		-10				10						0.364658	-10					0.401606
1			10		-10				10						0.36707	-10					0.404339
1			10		-10				10						0.370885	-10					0.405616
1			10		-10				10						0.375052	-10					0.409976
1			10		-10				10						0.380904	-10					0.426047
1			10		-10				10						0.381628	-10					0.428484
1			10		-10				10						0.386998	-10					0.436858
1			10		-10				10						0.391311	-10					0.441314
1			10		-10				10						0.392664	-10					0.447119
1			10		-10				10						0.397973	-10					0.452768
1			10		-10				10						0.401042	-10					0.455472
1			10		-10				10						0.401604	-10					0.455815
1			10		-10				10						0.401606	-10					0.461768
1			10		-10				-10						0.404339	-10					0.49167
1			10		-10				-10						0.409976	-10					0.49315
1			10		-10				-10						0.410015	-10					0.499708
1			10		-10				-10						0.412817	-10					0.513499
1			10		-10				-10						0.41932	-10					0.515693
1			10		-10				-10						0.420726	-10					0.540492
1			10		-10				-10						0.422988	-10					0.545196
1			10		-10				-10						0.427028	-10					0.547955
1			10		-10				-10						0.429513	-10					0.553466
1			10		-10				-10						0.436858	-10					0.553843
1			10		-10				-10						0.447119	-10					0.563408
1			10		-10				-10						0.449129	-10					0.579394
1			10		-10				-10						0.449826	-10					0.58036
1			10		-10				-10						0.452768	-10					0.583057
1			10		-10				-10						0.474605	-10					0.588453
1			10		-10				-10						0.479727	-10					0.594788
1			10		-10				-10						0.483995	-10					0.596102
1			10		-10				-10						0.49315						0.600137
1			10		-10				-10						0.495333						0.605383
1			10		-10				-10						0.496198						0.615698
1			10		-10				-10						0.497952						0.618886
1			10		-10				-10						0.515693						0.622569
1			10		-10				-10						0.517071						0.624088
1			10		-10				-10						0.519597						0.626443
1			10		-10				-10						0.522935						0.63081
1			10		-10				-10						0.53068						0.631355
1			10		-10				-10						0.535218						0.633531
1			10		-10				-10						0.540492						0.651262
1			10		-10				-10						0.547154						0.651323
1			10		-10				-10						0.547955						0.659473
1			10		-10				-10						0.550211						0.664987
1			-10		-10				-10						0.555731						0.680325
1			-10		-10				-10						0.563408						0.683791
1			-10		-10				-10						0.564119						0.68539
1			-10		-10				-10						0.573722						0.691196
1			-10		-10				-10						0.573978						0.693064
1			-10		-10				-10						0.57526						0.69866
1			-10		-10				-10						0.579394						0.705945
1			-10		-10				-10						0.58036						0.70897
1			-10		-10				-10						0.584448						0.710233
1			-10		-10				-10						0.588027						0.710822
1			-10		-10				-10						0.588453						0.714167
1			-10		-10				-10						0.588968						0.720503
1			-10		-10				-10						0.589995						0.725987
1			-10		-10				-10						0.59827						0.728605
1			-10		-10				-10						0.615698						0.733375
1			-10		-10				-10						0.624088						0.744506
1			-10		-10				-10						0.626992						0.747016
1			-10		-10				-10						0.633983						0.747079
1			-10		-10				-10						0.637747						0.747242
1			-10		-10				-10						0.647828						0.759359
1			-10		-10				-10						0.650562						0.771494
1			-10		-10				-10						0.650951						0.780381
1			-10		-10				-10						0.651262						0.780422
1			-10		-10				-10						0.651323						0.791
1			-10		-10				-10						0.659473						0.796741
1			-10		-10				-10						0.666325						0.797775
1			-10		-10				-10						0.669719						0.80644
1			-10		-10				-10						0.673981						0.81819
1			-10		-10				-10						0.68968						0.819527
1			-10		-10				-10						0.690474						0.819683
1			-10		-10				-10						0.706836						0.81976
1			-10		-10				-10						0.708149						0.824298
1			-10		-10				-10						0.708679						0.832155
1			-10		-10				-10						0.710233						0.83997
1			-10		-10				-10						0.714167						0.857554
1			-10		-10				-10						0.720503						0.862434
1			-10		-10				-10						0.726092						0.863073
1			-10		-10				-10						0.727444						0.86332
1			-10		-10				-10						0.744506						0.879436
1			-10		-10				-10						0.744952						0.891613
1			-10		-10				-10						0.757937						0.905009
1			-10		-10				-10						0.772661						0.905807
1			-10		-10				-10						0.775818						0.907787
1			-10		-10				-10						0.778146						0.907927
1			-10		-10				-10						0.779485						0.909003
1			-10		-10				-10						0.782245						0.915682
1			-10		-10				-10						0.796741						0.925924
1			-10		-10				-10						0.797032						0.931871
1			-10		-10				-10						0.797775						0.932525
1			-10		-10				-10						0.81819						0.934057
1			-10		-10				-10						0.824514						0.958073
1			-10		-10				-10						0.827955						0.958108
1			-10		-10				-10						0.831579						0.962473
1			-10		-10				-10						0.832155						0.968901
1			-10		-10				-10						0.834748						0.979344
1			-10		-10				-10						0.844097						0.982034
1			-10		-10				-10						0.849926						0.982985
1			-10		-10				-10						0.860981						0.992801
1			-10		-10				-10						0.863073						1.0116
1			-10		-10				-10						0.872769						1.01908
1			-10		-10				-10						0.879436						1.02269
1			-10		-10				-10						0.887915						1.0227
1			-10		-10				-10						0.891613						1.03253
1			-10		-10				-10						0.898991						1.03269
1			-10		-10				-10						0.907927						1.04262
1			-10		-10				-10						0.915682						1.05115
1			-10		-10				-10						0.931871						1.05194
1			-10		-10				-10						0.932525						1.06119
1			-10		-10				-10						0.941486						1.06903
1			-10		-10				-10						0.951401						1.0759
1			-10		-10				-10						0.958108						1.0773
1			-10		-10				-10						0.962473						1.07834
1			-10		-10				-10						0.9695						1.0886
1			-10		-10				-10						0.979344						1.09142
1			-10		-10				-10						0.979596						1.09155
1			-10		-10				-10						0.982034						1.09358
1			-10		-10				-10						0.982664						1.11776
1			-10		-10				-10						1.00513						1.11879
1			-10		-10				-10						1.00691						1.12388
1			-10		-10				-10						1.01146						1.13277
1			-10		-10				-10						1.01908						1.13611
1			-10		-10				-10						1.02053						1.13674
1			-10		-10				-10						1.0227						1.15038
1			-10		-10				-10						1.03074						1.15091
1			-10		-10				-10						1.03253						1.18844
1			-10		-10				-10						1.04637						1.1951
1			-10		-10				-10						1.04802						1.19653
1			-10		-10				-10						1.05115						1.21445
1			-10		-10				-10						1.05725						1.22
1			-10		-10				-10						1.06056						1.22259
1			-10		-10				-10						1.06119						1.23836
1			-10		-10				-10						1.06903						1.25815
1			-10		-10				-10						1.09328						1.26969
1			-10		-10				-10						1.09358						1.27284
1			-10		-10				-10						1.10816						1.27327
1			-10		-10				-10						1.11776						1.27612
1			-10		-10				-10						1.11879						1.27718
1			-10		-10				-10						1.13277						1.27912
1			-10		-10				-10						1.13611						1.29859
1			-10		-10				-10						1.14385						1.33249
1					-10				-10						1.15091						1.35496
1					-10				-10						1.16973						1.36548
1					-10				-10						1.17341						1.37002
1					-10				-10						1.17909						1.37735
1					-10				-10						1.18844						1.37821
1					-10				-10						1.19398						1.39142
1					-10				-10						1.20018						1.41602
1					-10				-10						1.2042						1.4178
1					-10				-10						1.20668						1.42082
1					-10				-10						1.21218						1.42974
1					-10				-10						1.21624						1.43842
1					-10				-10						1.21962						1.44402
1					-10				-10						1.22259						1.47236
1					-10				-10						1.2226						1.48634
1					-10				-10						1.23272						1.49708
1					-10				-10						1.23333						1.49795
1					-10				-10						1.25724						1.51148
1					-10				-10						1.25815						1.51746
1					-10				-10						1.25974						1.51775
1					-10				-10						1.27433						1.51907
1					-10				-10						1.27612						1.54086
1					-10				-10						1.27718						1.54512
1					-10				-10						1.27833						1.54569
1					-10				-10						1.27912						1.54607
1					-10				-10						1.27959						1.57688
1					-10				-10						1.28269						1.59932
1					-10				-10						1.29165						1.606
1					-10				-10						1.3187						1.60664
1					-10				-10						1.33249						1.61689
1					-10				-10						1.337						1.64967
1					-10				-10						1.35496						1.65895
1					-10				-10						1.37002						1.66201
1					-10				-10						1.38448						1.717
1					-10				-10						1.4158						1.72462
1					-10				-10						1.41602						1.7428
1					-10				-10						1.4178						1.74517
1					-10				-10						1.42026						1.7532
1					-10				-10						1.42082						1.77766
1					-10				-10						1.44402						1.94809
1					-10				-10						1.47236						1.97626
1					-10				-10						1.47564						1.97661
1					-10				-10						1.49373						1.97778
1					-10				-10						1.49551						2.35222
1					-10				-10						1.51148						2.73343
1					-10				-10						1.51746						2.81486
1					-10				-10						1.51775						2.84867
1					-10				-10						1.52386
1					-10				-10						1.52528
1					-10				-10						1.54607
1					-10				-10						1.59932
1					-10				-10						1.606
1					-10				-10						1.60664
1					-10				-10						1.62527
1					-10				-10						1.64519
1					-10				-10						1.67526
1					-10				-10						1.67614
1					-10				-10						1.68166
1					-10				-10						1.70441
1					-10				-10						1.73577
1					-10				-10						1.7428
1					-10				-10						1.74517
1					-10				-10						1.74608
1					-10				-10						1.7532
1					-10				-10						1.79644
1					-10				-10						1.81392
1					-10				-10						1.84057
1					-10				-10						1.84859
1					-10				-10						1.90251
1					-10				-10						1.90781
1					-10				-10						1.93089
1					-10				-10						1.94302
1					-10				-10						1.95989
1					-10				-10						1.97778
1					-10				-10						2.03257
1					-10				-10						2.0467
1					-10				-10						2.18196
1					-10				-10						2.184
1					-10				-10						2.20446
1					-10				-10						2.29535
1					-10				-10						2.33451
1					-10				-10						2.33825
1					-10				-10						2.35222
1					-10				-10						2.36329
1					-10				-10						2.48457
1					-10				-10						2.4862
1					-10				-10						2.51377
1					-10				-10						2.66657
1					-10				-10						2.96856
1					-10				-10						3.11743
1					-10				-10						3.27795
1					-10				-10						3.30724
1					-10				-10						3.38641
1					-10				-10						3.4575
1					-10				-10						3.61378
1					-10				-10						3.62794
1					-10				-10						3.68052
1					-10				-10						3.92276
1					-10				-10						4.14039
1					-10				-10						4.37319
1					-10				-10						4.59747
1					-10				-10						5.39884
1					-10				-10						5.60987
1					-10				-10						6.19601
1					-10				-10						8.21006
1					-10				-10						10
1					-10				-10						10
1					-10				-10						10
1					-10				-10						10
1					-10				-10						10
1					-10				-10						10
1					-10				-10						10
1					-10				-10						10
1					-10				-10						10
1					-10				-10						10
1					-10				-10						10
1					-10				-10						10
1					-10				-10						10
1					-10				-10						10
1					-10				-10						10
1					-10				-10						10
1					-10				-10						10
1					-10				-10						10
1					-10				-10						10
1					-10				-10						10
1					-10				-10						10
1					-10				-10						10
1					-10				-10						10
1					-10				-10						10
1					-10				-10						10
1					-10				-10						10
1					-10				-10						10
1					-10				-10						10
1					-10				-10						10
1					-10				-10						10
1					-10				-10						10
1					-10				-10						10
1					-10				-10						10
1					-10				-10						10
1					-10				-10						10
1					-10				-10						10
1					-10				-10						10
1					-10				-10						10
1					-10				-10						10
1					-10				-10						10
1					-10				-10						10
1					-10				-10						10
1					-10				-10						10
1					-10				-10						10
1					-10				-10						10
1					-10				-10						10
1					-10				-10						10
1					-10				-10						10
1					-10				-10						10
1					-10				-10						10
1					-10				-10						10
1					-10				-10						10
1					-10				-10						10
1					-10				-10						10
1					-10				-10						10
1					-10				-10						10
1					-10				-10						10
1					-10				-10						10
1					-10				-10						10
1					-10				-10						10
1					-10				-10						10
1					-10				-10						10
1					-10				-10						10
1					-10				-10						10
1					-10				-10						10
1					-10				-10						10
1					-10				-10						10
1					-10				-10						10
1					-10				-10						10
1					-10				-10						10
1					-10				-10						10
1					-10				-10						10
1					-10				-10						10
1					-10				-10						10
1					-10				-10						10
1					-10				-10						10
1					-10				-10						10
1					-10				-10						10
1					-10				-10						10
1					-10				-10						10
1					-10				-10						10
1					-10				-10						10
1					-10				-10						10
1					-10				-10						10
1					-10				-10						10
1					-10				-10						10
1					-10				-10						10
1					-10				-10						10
1					-10				-10						10
1					-10				-10						10
1					-10				-10						10
1					-10				-10						10
1					-10				-10						10
1					-10				-10						10
1					-10				-10						10
1					-10				-10						10
1					-10				-10						10
1					-10				-10						10
1					-10				-10						10
1					-10				-10						10
1					-10				-10						10
1					-10				-10						10
1					-10				-10						10
1					-10				-10						10
1					-10				-10						10
1					-10				-10						10
1					-10				-10						10
1					-10				-10						10
1					-10				-10						10
1					-10				-10						10
1					-10				-10						10
1					-10				-10						10
1					-10				-10						10
1					-10				-10						10
1					-10				-10						10
1					-10				-10						10
1					-10				-10						10
1					-10				-10						10
1					-10				-10						10
1					-10				-10						10
1					-10				-10						10
1					-10				-10						10
1					-10				-10						10
1					-10				-10						10
1					-10				-10						10
1					-10				-10						10
1					-10				-10						10
1					-10				-10						10
1					-10				-10						10
1					-10				-10						10
1					-10				-10						10
1					-10				-10						10
1					-10				-10						10
1					-10				-10						10
1					-10				-10						10
1					-10				-10						10
1					-10				-10						10
1					-10				-10						10
1					-10				-10						10
1					-10				-10						10
1					-10				-10						10
1					-10				-10						10
1					-10				-10						10
1					-10				-10						10
1					-10				-10						10
1					-10				-10						10
1					-10				-10						10
1					-10				-10						10
1					-10				-10						10
1					-10				-10						10
1					-10				-10						10
1					-10				-10						10
1					-10				-10						10
1					-10				-10						10
1					-10				-10						10
1					-10				-10						10
1					-10				-10						10
1					-10				-10						10
1					-10				-10						10
1					-10				-10						10
1					-10				-10						10
1					-10				-10						10
1					-10				-10						10
1					-10				-10						10
1					-10				-10						10
1					-10				-10						10
1					-10				-10						10
1					-10				-10						10
1					-10				-10						10
1					-10				-10						10
1					-10				-10						10
1					-10				-10						10
1					-10				-10						10
1					-10				-10						10
1					-10				-10						10
1					-10				-10						10
1					-10				-10						10
1					-10				-10						10
1					-10				-10						10
1					-10				-10						10
1					-10				-10						10
1					-10				-10						10
1					-10				-10						10
1					-10				-10						10
1					-10				-10						10
1					-10				-10						10
1					-10				-10						10
1					-10				-10						10
1					-10				-10						10
1					-10				-10						10
1					-10				-10						10
1					-10				-10						10
1					-10				-10						10
1					-10				-10						10
1					-10				-10						10
1					-10				-10						10
1					-10				-10						10
1					-10				-10						10
1									-10						10
1									-10						10
1									-10						10
1									-10						10
1									-10						10
1									-10						10
1									-10						10
1									-10						10
1									-10						10
1									-10						10
1									-10						10
1									-10						10
1									-10						10
1									-10						-10
1									-10						-10
1									-10						-10
1									-10						-10
1									-10						-10
1									-10						-10
1									-10						-10
1									-10						-10
1									-10						-10
1									-10						-10
1									-10						-10
1									-10						-10
1									-10						-10
1									-10						-10
1									-10						-10
1									-10						-10
1									-10						-10
1									-10						-10
1									-10						-10
1									-10						-10
1									-10						-10
1									-10						-10
1									-10						-10
1									-10						-10
1									-10						-10
1									-10						-10
1									-10						-10
															-10
															-10
															-10
															-10
															-10
															-10
															-10
															-10
															-10
															-10
															-10
															-10
															-10
															-10
															-10
															-10
															-10
															-10
															-10
															-10
															-10
															-10
															-10
															-10
															-10
															-10
															-10
															-10
															-10
															-10
															-10
															-10
															-10
															-10
															-10
															-10
															-10
															-10
															-10
															-10
															-10
															-10
															-10
															-10
															-10
															-10
															-10
															-10
															-10
															-10
															-10
															-10
															-10
															-10
															-10
															-10
															-10
															-10
															-10
															-10
															-10
															-10
															-10
															-10
															-10
															-10
															-10
															-10
															-10
															-10
															-10
															-10
															-10
															-10
															-10
															-10
															-10
															-10
															-10
															-10
															-10
															-10
															-10
															-10
															-10
															-10
															-10
															-10
															-10
															-10
															-10
															-10
															-10
															-10
															-10
															-10
															-10
															-10
															-10
															-10
															-10
															-10
															-10
															-10
															-10
															-10
															-10
															-10
															-10
															-10
															-10
															-10
															-10
															-10
															-10
															-10
															-10
															-10
															-10
															-10
															-10
															-10
															-10
															-10
															-10
															-10
															-10
															-10
															-10
															-10
															-10
															-10
															-10
															-10
															-10
															-10
															-10
															-10
															-10
															-10
															-10

## Sheet: Fig 5
B
	TOM20_0h	TOM20_2h	TOM20_4h	TOM20_8h	STOML2_0h	STOML2_2h	STOML2_4h	STOML2_8h	LAMP1_0h	LAMP1_2h	LAMP1_4h	LAMP1_8h
Rep1	3282	2858	2815	2668	957	928	551	908	2494	1744	1613	1793
Rep2	3209	2444	2857	2596	1141	942	609	699	2600	1652	1650	1728
Rep3	3171	2762	2688	2718	1015	853	937	866	2357	1706	1611	1618
average	3220.67	2688	2786.67	2660.67	1037.67	907.667	699	824.333	2483.67	1700.67	1624.67	1713
STD	56.4122	216.693	87.9905	61.3297	94.0709	47.8574	208.144	110.555	121.829	46.2313	21.9621	88.459
C
	TOM20_0h	TOM20_2h	TOM20_4h	TOM20_8h	STOML2_0h	STOML2_2h	STOML2_4h	STOML2_8h	LAMP1_0h	LAMP1_2h	LAMP1_4h	LAMP1_8h
Rep1	2844	2512	2491	2438	890	922	753	927	2492	1819	1844	1874
Rep2	2727	2157	2469	2368	1120	1006	757	817	2542	1663	1849	1829
Rep3	2741	2397	2424	2425	1015	913	868	870	2455	1833	1830	1845
average	2771	2355	2461	2410	1008	947	793	871	2496	1772	1841	1849
STD	63.9	181.1	34.2	37.2	115.1	51.3	65.3	55	43.7	94.4	9.8	22.8
D
OXPHOS complex	Accession	Gene Name	Protein names	GO (cellular component)	GO (biological process)	Subcellular location [CC]	Mitophagy Related Proteins	STOML2_log2FC(8h/0h)	STOML2_-log10P(8h/0h)	Significance
complex 1	O43674	NDUFB5	NADH dehydrogenase [ubiquinone] 1 beta subcomplex subunit 5, mitochondrial (Complex I-SGDH) (CI-SGDH) (NADH-ubiquinone oxidoreductase SGDH subunit)	mitochondrial inner membrane [GO:0005743]; mitochondrial respiratory chain complex I [GO:0005747]; mitochondrion [GO:0005739]; nucleoplasm [GO:0005654]	aerobic respiration [GO:0009060]; mitochondrial electron transport, NADH to ubiquinone [GO:0006120]; mitochondrial respiratory chain complex I assembly [GO:0032981]; proton motive force-driven mitochondrial ATP synthesis [GO:0042776]	SUBCELLULAR LOCATION: Mitochondrion inner membrane {ECO:0000305|PubMed:12611891}; Single-pass membrane protein {ECO:0000305}; Matrix side {ECO:0000305}.		-12	6	Significant
complex 1	O95139	NDUFB6	NADH dehydrogenase [ubiquinone] 1 beta subcomplex subunit 6 (Complex I-B17) (CI-B17) (NADH-ubiquinone oxidoreductase B17 subunit)	mitochondrial inner membrane [GO:0005743]; mitochondrial membrane [GO:0031966]; mitochondrial respiratory chain complex I [GO:0005747]; mitochondrion [GO:0005739]; nucleoplasm [GO:0005654]	aerobic respiration [GO:0009060]; mitochondrial ATP synthesis coupled electron transport [GO:0042775]; mitochondrial electron transport, NADH to ubiquinone [GO:0006120]; mitochondrial respiratory chain complex I assembly [GO:0032981]; proton motive force-driven mitochondrial ATP synthesis [GO:0042776]	SUBCELLULAR LOCATION: Mitochondrion inner membrane {ECO:0000305|PubMed:12611891}; Single-pass membrane protein {ECO:0000255}; Matrix side {ECO:0000305}.		-12	6	Significant
complex 1	Q9Y6M9	NDUFB9	NADH dehydrogenase [ubiquinone] 1 beta subcomplex subunit 9 (Complex I-B22) (CI-B22) (LYR motif-containing protein 3) (NADH-ubiquinone oxidoreductase B22 subunit)	mitochondrial inner membrane [GO:0005743]; mitochondrial respiratory chain complex I [GO:0005747]; mitochondrion [GO:0005739]	aerobic respiration [GO:0009060]; mitochondrial electron transport, NADH to ubiquinone [GO:0006120]; mitochondrial respiratory chain complex I assembly [GO:0032981]; proton motive force-driven mitochondrial ATP synthesis [GO:0042776]; sensory perception of sound [GO:0007605]	SUBCELLULAR LOCATION: Mitochondrion inner membrane {ECO:0000305|PubMed:12611891}; Peripheral membrane protein {ECO:0000305}; Matrix side {ECO:0000305}.		-12	6	Significant
complex 1	O75380	NDUFS6	NADH dehydrogenase [ubiquinone] iron-sulfur protein 6, mitochondrial (Complex I-13kD-A) (CI-13kD-A) (NADH-ubiquinone oxidoreductase 13 kDa-A subunit)	mitochondrial inner membrane [GO:0005743]; mitochondrial respiratory chain complex I [GO:0005747]	aerobic respiration [GO:0009060]; mitochondrial electron transport, NADH to ubiquinone [GO:0006120]; proton motive force-driven mitochondrial ATP synthesis [GO:0042776]	SUBCELLULAR LOCATION: Mitochondrion inner membrane {ECO:0000305|PubMed:12611891}; Peripheral membrane protein {ECO:0000305}; Matrix side {ECO:0000305}.		-12	6	Significant
complex 1	Q16718	NDUFA5	NADH dehydrogenase [ubiquinone] 1 alpha subcomplex subunit 5 (Complex I subunit B13) (Complex I-13kD-B) (CI-13kD-B) (NADH-ubiquinone oxidoreductase 13 kDa-B subunit)	mitochondrial inner membrane [GO:0005743]; mitochondrial respiratory chain complex I [GO:0005747]	aerobic respiration [GO:0009060]; mitochondrial electron transport, NADH to ubiquinone [GO:0006120]; mitochondrial respiratory chain complex I assembly [GO:0032981]; proton motive force-driven mitochondrial ATP synthesis [GO:0042776]; respiratory electron transport chain [GO:0022904]	SUBCELLULAR LOCATION: Mitochondrion inner membrane {ECO:0000305|PubMed:12611891}; Peripheral membrane protein {ECO:0000305}; Matrix side {ECO:0000305}.		-3.22754	1.71295	Significant
complex 1	O95299	NDUFA10	NADH dehydrogenase [ubiquinone] 1 alpha subcomplex subunit 10, mitochondrial (Complex I-42kD) (CI-42kD) (NADH-ubiquinone oxidoreductase 42 kDa subunit)	cytoplasm [GO:0005737]; mitochondrial inner membrane [GO:0005743]; mitochondrial matrix [GO:0005759]; mitochondrial respiratory chain complex I [GO:0005747]; mitochondrion [GO:0005739]	aerobic respiration [GO:0009060]; mitochondrial electron transport, NADH to ubiquinone [GO:0006120]; mitochondrial respiratory chain complex I assembly [GO:0032981]; proton motive force-driven mitochondrial ATP synthesis [GO:0042776]	SUBCELLULAR LOCATION: Mitochondrion matrix {ECO:0000305|PubMed:12611891}.		-5.49049	1.68227	Significant
complex 1	Q8N183	NDUFAF2	NADH dehydrogenase [ubiquinone] 1 alpha subcomplex assembly factor 2 (B17.2-like) (B17.2L) (Mimitin) (Myc-induced mitochondrial protein) (MMTN) (NDUFA12-like protein)	mitochondrial inner membrane [GO:0005743]; mitochondrion [GO:0005739]	mitochondrial respiratory chain complex I assembly [GO:0032981]; negative regulation of insulin secretion involved in cellular response to glucose stimulus [GO:0061179]	SUBCELLULAR LOCATION: Mitochondrion {ECO:0000269|PubMed:15774466}.		-1.71779	1.5369	Significant
complex 1	P19404	NDUFV2	NADH dehydrogenase [ubiquinone] flavoprotein 2, mitochondrial (NDUFV2) (EC 7.1.1.2) (NADH-ubiquinone oxidoreductase 24 kDa subunit)	mitochondrial inner membrane [GO:0005743]; mitochondrial respiratory chain complex I [GO:0005747]; mitochondrion [GO:0005739]	aerobic respiration [GO:0009060]; cardiac muscle tissue development [GO:0048738]; mitochondrial electron transport, NADH to ubiquinone [GO:0006120]; nervous system development [GO:0007399]; proton motive force-driven mitochondrial ATP synthesis [GO:0042776]	SUBCELLULAR LOCATION: Mitochondrion inner membrane {ECO:0000250|UniProtKB:P04394}; Peripheral membrane protein {ECO:0000250|UniProtKB:P04394}; Matrix side {ECO:0000250|UniProtKB:P04394}.		-3.20194	1.52111	Significant
complex 1	P56556	NDUFA6	NADH dehydrogenase [ubiquinone] 1 alpha subcomplex subunit 6 (Complex I-B14) (CI-B14) (LYR motif-containing protein 6) (NADH-ubiquinone oxidoreductase B14 subunit)	mitochondrial inner membrane [GO:0005743]; mitochondrial membrane [GO:0031966]; mitochondrial respiratory chain complex I [GO:0005747]	aerobic respiration [GO:0009060]; mitochondrial electron transport, NADH to ubiquinone [GO:0006120]; mitochondrial respiratory chain complex I assembly [GO:0032981]; proton motive force-driven mitochondrial ATP synthesis [GO:0042776]; response to oxidative stress [GO:0006979]	SUBCELLULAR LOCATION: Mitochondrion inner membrane {ECO:0000305|PubMed:12611891}; Peripheral membrane protein {ECO:0000305}; Matrix side {ECO:0000305}.		-6.66278	1.5001	Significant
complex 1	P28331	NDUFS1	NADH-ubiquinone oxidoreductase 75 kDa subunit, mitochondrial (EC 7.1.1.2) (Complex I-75kD) (CI-75kD)	mitochondrial inner membrane [GO:0005743]; mitochondrial intermembrane space [GO:0005758]; mitochondrial matrix [GO:0005759]; mitochondrial respiratory chain complex I [GO:0005747]; mitochondrion [GO:0005739]	aerobic respiration [GO:0009060]; apoptotic mitochondrial changes [GO:0008637]; ATP metabolic process [GO:0046034]; cellular respiration [GO:0045333]; mitochondrial electron transport, NADH to ubiquinone [GO:0006120]; mitochondrial respiratory chain complex I assembly [GO:0032981]; proton motive force-driven mitochondrial ATP synthesis [GO:0042776]; reactive oxygen species metabolic process [GO:0…	SUBCELLULAR LOCATION: Mitochondrion inner membrane {ECO:0000305|PubMed:12611891, ECO:0000305|PubMed:30879903}; Peripheral membrane protein {ECO:0000250|UniProtKB:P15690}; Matrix side {ECO:0000250|UniProtKB:P15690}.		-5.95363	1.41581	Significant
complex 1	Q16795	NDUFA9	NADH dehydrogenase [ubiquinone] 1 alpha subcomplex subunit 9, mitochondrial (Complex I-39kD) (CI-39kD) (NADH-ubiquinone oxidoreductase 39 kDa subunit)	mitochondrial inner membrane [GO:0005743]; mitochondrial matrix [GO:0005759]; mitochondrial membrane [GO:0031966]; mitochondrial respiratory chain complex I [GO:0005747]; mitochondrion [GO:0005739]; nucleus [GO:0005634]	aerobic respiration [GO:0009060]; circadian rhythm [GO:0007623]; mitochondrial electron transport, NADH to ubiquinone [GO:0006120]; mitochondrial respiratory chain complex I assembly [GO:0032981]; proton motive force-driven mitochondrial ATP synthesis [GO:0042776]; sodium ion transport [GO:0006814]; ubiquinone-6 biosynthetic process [GO:1901006]	SUBCELLULAR LOCATION: Mitochondrion matrix {ECO:0000305|PubMed:12611891}.		-5.31057	1.4007	Significant
complex 1	O75489	NDUFS3	NADH dehydrogenase [ubiquinone] iron-sulfur protein 3, mitochondrial (EC 7.1.1.2) (Complex I-30kD) (CI-30kD) (NADH-ubiquinone oxidoreductase 30 kDa subunit)	mitochondrial inner membrane [GO:0005743]; mitochondrial matrix [GO:0005759]; mitochondrial membrane [GO:0031966]; mitochondrial respiratory chain complex I [GO:0005747]; mitochondrion [GO:0005739]; nuclear body [GO:0016604]	aerobic respiration [GO:0009060]; mitochondrial electron transport, NADH to ubiquinone [GO:0006120]; mitochondrial respiratory chain complex I assembly [GO:0032981]; negative regulation of cell growth [GO:0030308]; negative regulation of intrinsic apoptotic signaling pathway [GO:2001243]; proton motive force-driven mitochondrial ATP synthesis [GO:0042776]; reactive oxygen species metabolic proces…	SUBCELLULAR LOCATION: Mitochondrion inner membrane {ECO:0000269|PubMed:18826940, ECO:0000305|PubMed:12611891, ECO:0000305|PubMed:17209039}; Peripheral membrane protein {ECO:0000305|PubMed:18826940}; Matrix side {ECO:0000269|PubMed:18826940}.		-3.10004	1.34567	Significant
complex 1	Q5TEU4	NDUFAF5	Arginine-hydroxylase NDUFAF5, mitochondrial (EC 1.-.-.-) (NADH dehydrogenase [ubiquinone] 1 alpha subcomplex assembly factor 5) (Putative methyltransferase NDUFAF5) (EC 2.1.1.-)	matrix side of mitochondrial inner membrane [GO:0099617]; mitochondrial inner membrane [GO:0005743]; mitochondrion [GO:0005739]	methylation [GO:0032259]; mitochondrial respiratory chain complex I assembly [GO:0032981]; peptidyl-arginine hydroxylation [GO:0030961]	SUBCELLULAR LOCATION: Mitochondrion inner membrane {ECO:0000269|PubMed:18940309, ECO:0000269|PubMed:27226634, ECO:0000269|PubMed:35614220}. Note=Peripherally localized on the matrix face of the mitochondrial inner membrane. {ECO:0000269|PubMed:18940309}.		-2.09626	1.3281	Significant
complex 1	Q7L592	NDUFAF7	Protein arginine methyltransferase NDUFAF7, mitochondrial (EC 2.1.1.320) (NADH dehydrogenase [ubiquinone] complex I, assembly factor 7) (Protein midA homolog)	extracellular space [GO:0005615]; mitochondrial matrix [GO:0005759]; mitochondrion [GO:0005739]	mitochondrial respiratory chain complex I assembly [GO:0032981]; peptidyl-arginine methylation, to symmetrical-dimethyl arginine [GO:0019918]	SUBCELLULAR LOCATION: Mitochondrion {ECO:0000269|PubMed:20406883, ECO:0000269|PubMed:24089531, ECO:0000269|PubMed:24838397, ECO:0000269|PubMed:28837730}.		-1.23002	1.21489	Not significant
complex 1	Q9P032	NDUFAF4	NADH dehydrogenase [ubiquinone] 1 alpha subcomplex assembly factor 4 (Hormone-regulated proliferation-associated protein of 20 kDa)	cytosol [GO:0005829]; mitochondrial inner membrane [GO:0005743]; mitochondrial membrane [GO:0031966]; mitochondrion [GO:0005739]	defense response to virus [GO:0051607]; mitochondrial respiratory chain complex I assembly [GO:0032981]; negative regulation of apoptotic process [GO:0043066]; positive regulation of cell population proliferation [GO:0008284]	SUBCELLULAR LOCATION: Mitochondrion {ECO:0000269|PubMed:18179882}. Membrane {ECO:0000305}; Lipid-anchor {ECO:0000305}.		0.826909	0.945109	Not significant
complex 1	O43676	NDUFB3	NADH dehydrogenase [ubiquinone] 1 beta subcomplex subunit 3 (Complex I-B12) (CI-B12) (NADH-ubiquinone oxidoreductase B12 subunit)	mitochondrial inner membrane [GO:0005743]; mitochondrial respiratory chain complex I [GO:0005747]	aerobic respiration [GO:0009060]; mitochondrial electron transport, NADH to ubiquinone [GO:0006120]; mitochondrial respiratory chain complex I assembly [GO:0032981]; proton motive force-driven mitochondrial ATP synthesis [GO:0042776]	SUBCELLULAR LOCATION: Mitochondrion inner membrane {ECO:0000305|PubMed:12611891}; Single-pass membrane protein {ECO:0000305}; Matrix side {ECO:0000305}.		-7.22002		Not significant
complex 1	Q9UI09	NDUFA12	NADH dehydrogenase [ubiquinone] 1 alpha subcomplex subunit 12 (13 kDa differentiation-associated protein) (Complex I-B17.2) (CI-B17.2) (CIB17.2) (NADH-ubiquinone oxidoreductase subunit B17.2)	cytosol [GO:0005829]; mitochondrial inner membrane [GO:0005743]; mitochondrial respiratory chain complex I [GO:0005747]; mitochondrion [GO:0005739]	aerobic respiration [GO:0009060]; mitochondrial ATP synthesis coupled electron transport [GO:0042775]; mitochondrial respiratory chain complex I assembly [GO:0032981]; proton motive force-driven mitochondrial ATP synthesis [GO:0042776]; respiratory gaseous exchange by respiratory system [GO:0007585]; response to oxidative stress [GO:0006979]	SUBCELLULAR LOCATION: Mitochondrion inner membrane {ECO:0000305|PubMed:12611891}; Peripheral membrane protein {ECO:0000255}; Matrix side {ECO:0000305}.		-6.8337		Not significant
complex 1	O95168	NDUFB4	NADH dehydrogenase [ubiquinone] 1 beta subcomplex subunit 4 (Complex I-B15) (CI-B15) (NADH-ubiquinone oxidoreductase B15 subunit)	mitochondrial inner membrane [GO:0005743]; mitochondrial respiratory chain complex I [GO:0005747]; mitochondrion [GO:0005739]; nucleoplasm [GO:0005654]	aerobic respiration [GO:0009060]; mitochondrial electron transport, NADH to ubiquinone [GO:0006120]; mitochondrial respiratory chain complex I assembly [GO:0032981]; proton motive force-driven mitochondrial ATP synthesis [GO:0042776]; response to oxidative stress [GO:0006979]	SUBCELLULAR LOCATION: Mitochondrion inner membrane {ECO:0000305|PubMed:12611891}; Single-pass membrane protein {ECO:0000255}; Matrix side {ECO:0000305}.		-5.00068		Not significant
complex 1	O75306	NDUFS2	NADH dehydrogenase [ubiquinone] iron-sulfur protein 2, mitochondrial (EC 7.1.1.2) (Complex I-49kD) (CI-49kD) (NADH-ubiquinone oxidoreductase 49 kDa subunit)	mitochondrial inner membrane [GO:0005743]; mitochondrial matrix [GO:0005759]; mitochondrial respiratory chain complex I [GO:0005747]; mitochondrion [GO:0005739]; nucleoplasm [GO:0005654]	aerobic respiration [GO:0009060]; cellular response to oxygen levels [GO:0071453]; gliogenesis [GO:0042063]; mitochondrial ATP synthesis coupled electron transport [GO:0042775]; mitochondrial electron transport, NADH to ubiquinone [GO:0006120]; mitochondrial respiratory chain complex I assembly [GO:0032981]; neural precursor cell proliferation [GO:0061351]; neurogenesis [GO:0022008]; proton motiv…	SUBCELLULAR LOCATION: Mitochondrion inner membrane {ECO:0000305|PubMed:12611891, ECO:0000305|PubMed:9585441}; Peripheral membrane protein {ECO:0000250|UniProtKB:Q641Y2}; Matrix side {ECO:0000250|UniProtKB:Q641Y2}.		-4.63169		Not significant
complex 1	O00217	NDUFS8	NADH dehydrogenase [ubiquinone] iron-sulfur protein 8, mitochondrial (EC 7.1.1.2) (Complex I-23kD) (CI-23kD) (NADH-ubiquinone oxidoreductase 23 kDa subunit) (TYKY subunit)	mitochondrial inner membrane [GO:0005743]; mitochondrial matrix [GO:0005759]; mitochondrial respiratory chain complex I [GO:0005747]; mitochondrion [GO:0005739]	aerobic respiration [GO:0009060]; mitochondrial electron transport, NADH to ubiquinone [GO:0006120]; mitochondrial respiratory chain complex I assembly [GO:0032981]; proton motive force-driven mitochondrial ATP synthesis [GO:0042776]; response to oxidative stress [GO:0006979]	SUBCELLULAR LOCATION: Mitochondrion inner membrane {ECO:0000305|PubMed:12611891, ECO:0000305|PubMed:9666055}; Peripheral membrane protein {ECO:0000250|UniProtKB:P42028}; Matrix side {ECO:0000250|UniProtKB:P42028}.		-4.35529		Not significant
complex 1	O75251	NDUFS7	NADH dehydrogenase [ubiquinone] iron-sulfur protein 7, mitochondrial (EC 7.1.1.2) (Complex I-20kD) (CI-20kD) (NADH-ubiquinone oxidoreductase 20 kDa subunit) (PSST subunit)	mitochondrial inner membrane [GO:0005743]; mitochondrial matrix [GO:0005759]; mitochondrial respiratory chain complex I [GO:0005747]; neuronal cell body [GO:0043025]; synaptic membrane [GO:0097060]	aerobic respiration [GO:0009060]; electron transport coupled proton transport [GO:0015990]; mitochondrial electron transport, NADH to ubiquinone [GO:0006120]; mitochondrial respiratory chain complex I assembly [GO:0032981]; proton motive force-driven mitochondrial ATP synthesis [GO:0042776]	SUBCELLULAR LOCATION: Mitochondrion inner membrane {ECO:0000305|PubMed:12611891}; Peripheral membrane protein {ECO:0000250|UniProtKB:P42026}; Matrix side {ECO:0000250|UniProtKB:P42026}.		-3.12155		Not significant
complex 2	Q5VUM1	SDHAF4	Succinate dehydrogenase assembly factor 4, mitochondrial (SDH assembly factor 4) (SDHAF4)	mitochondrial matrix [GO:0005759]; mitochondrion [GO:0005739]	cellular respiration [GO:0045333]; innate immune response [GO:0045087]; mitochondrial respiratory chain complex II assembly [GO:0034553]	SUBCELLULAR LOCATION: Mitochondrion matrix {ECO:0000250|UniProtKB:P38345}.		-1.88018	1.33089	Significant
complex 2	Q9NRP4	SDHAF3	Succinate dehydrogenase assembly factor 3, mitochondrial (SDH assembly factor 3) (SDHAF3)	mitochondrial intermembrane space [GO:0005758]; mitochondrial matrix [GO:0005759]	mitochondrial respiratory chain complex II assembly [GO:0034553]; regulation of gluconeogenesis [GO:0006111]; succinate metabolic process [GO:0006105]	SUBCELLULAR LOCATION: Mitochondrion matrix {ECO:0000250|UniProtKB:Q04401}.		-5.33164	0.920528	Not significant
complex 2	P21912	SDHB	Succinate dehydrogenase [ubiquinone] iron-sulfur subunit, mitochondrial (EC 1.3.5.1) (Iron-sulfur subunit of complex II) (Ip)	mitochondrial inner membrane [GO:0005743]; mitochondrial membrane [GO:0031966]; mitochondrial respiratory chain complex II, succinate dehydrogenase complex (ubiquinone) [GO:0005749]; mitochondrion [GO:0005739]; nucleoplasm [GO:0005654]; plasma membrane [GO:0005886]	aerobic respiration [GO:0009060]; mitochondrial electron transport, succinate to ubiquinone [GO:0006121]; proton motive force-driven mitochondrial ATP synthesis [GO:0042776]; respiratory electron transport chain [GO:0022904]; tricarboxylic acid cycle [GO:0006099]	SUBCELLULAR LOCATION: Mitochondrion inner membrane {ECO:0000250|UniProtKB:Q9YHT2}; Peripheral membrane protein {ECO:0000250|UniProtKB:Q9YHT2}; Matrix side {ECO:0000250|UniProtKB:Q9YHT2}.		-0.626157	0.541844	Not significant
complex 2	P31040	SDHA	Succinate dehydrogenase [ubiquinone] flavoprotein subunit, mitochondrial (EC 1.3.5.1) (Flavoprotein subunit of complex II) (Fp)	mitochondrial inner membrane [GO:0005743]; mitochondrial respiratory chain complex II, succinate dehydrogenase complex (ubiquinone) [GO:0005749]; mitochondrion [GO:0005739]; nucleolus [GO:0005730]	mitochondrial electron transport, succinate to ubiquinone [GO:0006121]; nervous system development [GO:0007399]; proton motive force-driven mitochondrial ATP synthesis [GO:0042776]; respiratory electron transport chain [GO:0022904]; succinate metabolic process [GO:0006105]; tricarboxylic acid cycle [GO:0006099]	SUBCELLULAR LOCATION: Mitochondrion inner membrane {ECO:0000250|UniProtKB:Q0QF01}; Peripheral membrane protein {ECO:0000250|UniProtKB:Q0QF01}; Matrix side {ECO:0000250|UniProtKB:Q0QF01}.		2.36934	0.304148	Not significant
complex 2	Q9NX18	SDHAF2	Succinate dehydrogenase assembly factor 2, mitochondrial (SDH assembly factor 2) (SDHAF2)	cytosol [GO:0005829]; mitochondrial matrix [GO:0005759]; mitochondrion [GO:0005739]; nucleolus [GO:0005730]	mitochondrial electron transport, succinate to ubiquinone [GO:0006121]; mitochondrial respiratory chain complex II assembly [GO:0034553]; negative regulation of canonical Wnt signaling pathway [GO:0090090]; negative regulation of epithelial to mesenchymal transition [GO:0010719]; protein dephosphorylation [GO:0006470]; protein-FAD linkage [GO:0018293]; tricarboxylic acid cycle [GO:0006099]	SUBCELLULAR LOCATION: Mitochondrion matrix {ECO:0000255|HAMAP-Rule:MF_03057, ECO:0000269|PubMed:19628817}.		-0.0843532		Not significant
complex 3	P31930	UQCRC1	Cytochrome b-c1 complex subunit 1, mitochondrial (Complex III subunit 1) (Core protein I) (Ubiquinol-cytochrome-c reductase complex core protein 1)	mitochondrial inner membrane [GO:0005743]; mitochondrial respirasome [GO:0005746]; mitochondrial respiratory chain complex III [GO:0005750]; mitochondrion [GO:0005739]	aerobic respiration [GO:0009060]; cellular respiration [GO:0045333]; mitochondrial electron transport, ubiquinol to cytochrome c [GO:0006122]; oxidative phosphorylation [GO:0006119]; response to activity [GO:0014823]; response to alkaloid [GO:0043279]	SUBCELLULAR LOCATION: Mitochondrion inner membrane {ECO:0000250|UniProtKB:P07256}; Peripheral membrane protein {ECO:0000250|UniProtKB:P07256}; Matrix side {ECO:0000250|UniProtKB:P07256}.		-12	6	Significant
complex 3	P14927	UQCRB	Cytochrome b-c1 complex subunit 7 (Complex III subunit 7) (Complex III subunit VII) (QP-C) (Ubiquinol-cytochrome c reductase complex 14 kDa protein)	mitochondrial inner membrane [GO:0005743]; mitochondrial respirasome [GO:0005746]; mitochondrial respiratory chain complex III [GO:0005750]	aerobic respiration [GO:0009060]; cellular respiration [GO:0045333]; mitochondrial electron transport, ubiquinol to cytochrome c [GO:0006122]; oxidative phosphorylation [GO:0006119]	SUBCELLULAR LOCATION: Mitochondrion inner membrane {ECO:0000250|UniProtKB:P00128}; Peripheral membrane protein {ECO:0000250|UniProtKB:P00128}; Matrix side {ECO:0000250|UniProtKB:P00128}.		-12	6	Significant
complex 3	P47985	UQCRFS1	Cytochrome b-c1 complex subunit Rieske, mitochondrial (EC 7.1.1.8) (Complex III subunit 5) (Cytochrome b-c1 complex subunit 5) (Rieske iron-sulfur protein) (RISP) (Rieske protein UQCRFS1) (Ubiquinol-cytochrome c reductase iron-sulfur subunit) [Cleaved into: Cytochrome b-c1 complex subunit 9 (Su9) (Subunit 9) (8 kDa subunit 9) (Complex III subunit IX) (Cytochrome b-c1 complex subunit 11) (UQCRFS1 …	mitochondrial inner membrane [GO:0005743]; mitochondrial respiratory chain complex III [GO:0005750]; mitochondrial respiratory chain complex IV [GO:0005751]; mitochondrion [GO:0005739]	mitochondrial electron transport, ubiquinol to cytochrome c [GO:0006122]; mitochondrial respiratory chain complex III assembly [GO:0034551]; respiratory electron transport chain [GO:0022904]	SUBCELLULAR LOCATION: Mitochondrion inner membrane {ECO:0000305|PubMed:31883641}; Single-pass membrane protein {ECO:0000250|UniProtKB:Q5ZLR5}.		-2.3502	1.12976	Not significant
complex 3	P22695	UQCRC2	Cytochrome b-c1 complex subunit 2, mitochondrial (Complex III subunit 2) (Core protein II) (Ubiquinol-cytochrome-c reductase complex core protein 2)	mitochondrial inner membrane [GO:0005743]; mitochondrial respiratory chain complex III [GO:0005750]; mitochondrial respiratory chain complex IV [GO:0005751]; mitochondrion [GO:0005739]; nucleoplasm [GO:0005654]	aerobic respiration [GO:0009060]; cellular respiration [GO:0045333]; mitochondrial electron transport, ubiquinol to cytochrome c [GO:0006122]; oxidative phosphorylation [GO:0006119]; proteolysis [GO:0006508]	SUBCELLULAR LOCATION: Mitochondrion inner membrane {ECO:0000250|UniProtKB:P07257}; Peripheral membrane protein {ECO:0000250|UniProtKB:P07257}; Matrix side {ECO:0000250|UniProtKB:P07257}.		-1.75888	0.63546	Not significant
complex 4	O14548	COX7A2L	Cytochrome c oxidase subunit 7A-related protein, mitochondrial (COX7a-related protein) (Cytochrome c oxidase subunit VIIa-related protein) (EB1)	mitochondrial inner membrane [GO:0005743]; mitochondrial respirasome [GO:0005746]; mitochondrial respiratory chain complex IV [GO:0005751]; mitochondrion [GO:0005739]; nucleolus [GO:0005730]	mitochondrial electron transport, cytochrome c to oxygen [GO:0006123]; mitochondrial respirasome assembly [GO:0097250]; regulation of oxidative phosphorylation [GO:0002082]	SUBCELLULAR LOCATION: Mitochondrion inner membrane {ECO:0000250}.		-12	6	Significant
complex 4	P14406	COX7A2	Cytochrome c oxidase subunit 7A2, mitochondrial (Cytochrome c oxidase subunit VIIa-liver/heart) (Cytochrome c oxidase subunit VIIa-L) (Cytochrome c oxidase subunit VIIaL)	mitochondrial membrane [GO:0031966]; mitochondrial respirasome [GO:0005746]; mitochondrial respiratory chain complex IV [GO:0005751]	cellular respiration [GO:0045333]; mitochondrial electron transport, cytochrome c to oxygen [GO:0006123]; mitochondrial respirasome assembly [GO:0097250]; regulation of oxidative phosphorylation [GO:0002082]	SUBCELLULAR LOCATION: Mitochondrion inner membrane {ECO:0000269|PubMed:30030519}; Single-pass membrane protein {ECO:0000269|PubMed:30030519}.		-12	6	Significant
complex 4	P10606	COX5B	Cytochrome c oxidase subunit 5B, mitochondrial (Cytochrome c oxidase polypeptide Vb)	mitochondrial inner membrane [GO:0005743]; mitochondrial membrane [GO:0031966]; mitochondrial respiratory chain complex IV [GO:0005751]; mitochondrion [GO:0005739]	cellular respiration [GO:0045333]; mitochondrial electron transport, cytochrome c to oxygen [GO:0006123]; respiratory gaseous exchange by respiratory system [GO:0007585]	SUBCELLULAR LOCATION: Mitochondrion inner membrane {ECO:0000269|PubMed:30030519}; Peripheral membrane protein {ECO:0000269|PubMed:30030519}; Matrix side {ECO:0000269|PubMed:30030519}.		-2.13658	1.65564	Significant
complex 4	P13073	COX4I1	Cytochrome c oxidase subunit 4 isoform 1, mitochondrial (Cytochrome c oxidase polypeptide IV) (Cytochrome c oxidase subunit IV isoform 1) (COX IV-1)	cytosol [GO:0005829]; membrane [GO:0016020]; mitochondrial inner membrane [GO:0005743]; mitochondrial membrane [GO:0031966]; mitochondrial respiratory chain complex IV [GO:0005751]; mitochondrion [GO:0005739]; nucleoplasm [GO:0005654]	cellular respiration [GO:0045333]; generation of precursor metabolites and energy [GO:0006091]; mitochondrial electron transport, cytochrome c to oxygen [GO:0006123]			-3.74321	1.37221	Significant
complex 4	Q9P0S2	COX16	Cytochrome c oxidase assembly protein COX16 homolog, mitochondrial (hCOX16)	mitochondrial inner membrane [GO:0005743]	mitochondrial cytochrome c oxidase assembly [GO:0033617]	SUBCELLULAR LOCATION: Mitochondrion inner membrane {ECO:0000269|PubMed:29355485, ECO:0000269|PubMed:29381136}; Single-pass membrane protein {ECO:0000305|PubMed:29381136}.		-1.17608	0.720877	Not significant
complex 4	P20674	COX5A	Cytochrome c oxidase subunit 5A, mitochondrial (Cytochrome c oxidase polypeptide Va)	mitochondrial inner membrane [GO:0005743]; mitochondrial membrane [GO:0031966]; mitochondrial respiratory chain complex IV [GO:0005751]	cellular respiration [GO:0045333]; mitochondrial electron transport, cytochrome c to oxygen [GO:0006123]	SUBCELLULAR LOCATION: Mitochondrion inner membrane {ECO:0000269|PubMed:30030519}; Peripheral membrane protein {ECO:0000269|PubMed:30030519}; Matrix side {ECO:0000269|PubMed:30030519}.		0.400345	0.364131	Not significant
complex 5	O75964	ATP5MG	ATP synthase subunit g, mitochondrial (ATPase subunit g) (ATP synthase membrane subunit g)	mitochondrial inner membrane [GO:0005743]; mitochondrial proton-transporting ATP synthase complex [GO:0005753]; mitochondrial proton-transporting ATP synthase complex, coupling factor F(o) [GO:0000276]; mitochondrion [GO:0005739]	proton motive force-driven ATP synthesis [GO:0015986]; proton motive force-driven mitochondrial ATP synthesis [GO:0042776]	SUBCELLULAR LOCATION: Mitochondrion. Mitochondrion inner membrane.		-12	6	Significant
complex 5	P56381	ATP5F1E	ATP synthase subunit epsilon, mitochondrial (ATPase subunit epsilon) (ATP synthase F1 subunit epsilon)	mitochondrial inner membrane [GO:0005743]; mitochondrial matrix [GO:0005759]; mitochondrial proton-transporting ATP synthase complex [GO:0005753]; mitochondrial proton-transporting ATP synthase complex, catalytic sector F(1) [GO:0000275]	proton motive force-driven ATP synthesis [GO:0015986]; proton motive force-driven mitochondrial ATP synthesis [GO:0042776]	SUBCELLULAR LOCATION: Mitochondrion. Mitochondrion inner membrane.		-12	6	Significant
complex 5	P18859	ATP5PF	ATP synthase-coupling factor 6, mitochondrial (ATPase subunit F6) (ATP synthase peripheral stalk subunit F6)	mitochondrial inner membrane [GO:0005743]; mitochondrial proton-transporting ATP synthase complex [GO:0005753]; mitochondrial proton-transporting ATP synthase complex, coupling factor F(o) [GO:0000276]; mitochondrion [GO:0005739]	proton motive force-driven ATP synthesis [GO:0015986]; proton motive force-driven mitochondrial ATP synthesis [GO:0042776]; substantia nigra development [GO:0021762]	SUBCELLULAR LOCATION: Mitochondrion. Mitochondrion inner membrane.		-3.6175	1.68957	Significant
complex 5	O75947	ATP5PD	ATP synthase subunit d, mitochondrial (ATPase subunit d) (ATP synthase peripheral stalk subunit d)	mitochondrial inner membrane [GO:0005743]; mitochondrial proton-transporting ATP synthase complex [GO:0005753]; mitochondrial proton-transporting ATP synthase, stator stalk [GO:0000274]; mitochondrion [GO:0005739]	proton motive force-driven ATP synthesis [GO:0015986]; proton motive force-driven mitochondrial ATP synthesis [GO:0042776]	SUBCELLULAR LOCATION: Mitochondrion. Mitochondrion inner membrane.		-4.07526	1.51466	Significant
complex 5	P24539	ATP5PB	ATP synthase F(0) complex subunit B1, mitochondrial (ATP synthase peripheral stalk-membrane subunit b) (ATP synthase proton-transporting mitochondrial F(0) complex subunit B1) (ATP synthase subunit b) (ATPase subunit b)	membrane [GO:0016020]; mitochondrial inner membrane [GO:0005743]; mitochondrial matrix [GO:0005759]; mitochondrial proton-transporting ATP synthase complex [GO:0005753]; mitochondrial proton-transporting ATP synthase complex, coupling factor F(o) [GO:0000276]; mitochondrion [GO:0005739]; nucleus [GO:0005634]	proton motive force-driven ATP synthesis [GO:0015986]; proton motive force-driven mitochondrial ATP synthesis [GO:0042776]; substantia nigra development [GO:0021762]	SUBCELLULAR LOCATION: Mitochondrion. Mitochondrion inner membrane.		-5.20059	1.51274	Significant
complex 5	P36542	ATP5F1C	ATP synthase subunit gamma, mitochondrial (ATP synthase F1 subunit gamma) (F-ATPase gamma subunit)	membrane [GO:0016020]; mitochondrial inner membrane [GO:0005743]; mitochondrial matrix [GO:0005759]; mitochondrial proton-transporting ATP synthase complex [GO:0005753]; mitochondrial proton-transporting ATP synthase complex, catalytic sector F(1) [GO:0000275]; mitochondrion [GO:0005739]	ATP biosynthetic process [GO:0006754]; oxidative phosphorylation [GO:0006119]; proton motive force-driven ATP synthesis [GO:0015986]; proton motive force-driven mitochondrial ATP synthesis [GO:0042776]	SUBCELLULAR LOCATION: Mitochondrion inner membrane {ECO:0000250|UniProtKB:P05631}; Peripheral membrane protein {ECO:0000250|UniProtKB:P05631}; Matrix side {ECO:0000250|UniProtKB:P05631}.		-5.66629	1.40336	Significant
complex 5	P25705	ATP5F1A	ATP synthase subunit alpha, mitochondrial (ATP synthase F1 subunit alpha)	cell surface [GO:0009986]; extracellular exosome [GO:0070062]; membrane [GO:0016020]; membrane raft [GO:0045121]; mitochondrial inner membrane [GO:0005743]; mitochondrial matrix [GO:0005759]; mitochondrial proton-transporting ATP synthase complex [GO:0005753]; mitochondrial proton-transporting ATP synthase, catalytic core [GO:0005754]; mitochondrion [GO:0005739]; plasma membrane [GO:0005886]; pro…	ATP biosynthetic process [GO:0006754]; cellular response to dexamethasone stimulus [GO:0071549]; cellular response to nitric oxide [GO:0071732]; lipid metabolic process [GO:0006629]; negative regulation of endothelial cell proliferation [GO:0001937]; positive regulation of blood vessel endothelial cell migration [GO:0043536]; proton motive force-driven ATP synthesis [GO:0015986]; proton motive fo…	SUBCELLULAR LOCATION: Mitochondrion {ECO:0000269|PubMed:30146159}. Mitochondrion inner membrane {ECO:0000250|UniProtKB:P19483}; Peripheral membrane protein {ECO:0000250|UniProtKB:P19483}; Matrix side {ECO:0000250|UniProtKB:P19483}. Cell membrane {ECO:0000269|PubMed:10077593}; Peripheral membrane protein {ECO:0000269|PubMed:10077593}; Extracellular side {ECO:0000269|PubMed:10077593}. Note=Colocali…		-1.46569	1.03579	Not significant
complex 5	Q5TC12	ATPAF1	ATP synthase mitochondrial F1 complex assembly factor 1 (ATP11 homolog)	mitochondrion [GO:0005739]	mitochondrial proton-transporting ATP synthase complex assembly [GO:0033615]	SUBCELLULAR LOCATION: Mitochondrion {ECO:0000250}.		1.0782	0.870043	Not significant
complex 5	P06576	ATP5F1B	ATP synthase subunit beta, mitochondrial (EC 7.1.2.2) (ATP synthase F1 subunit beta)	cell surface [GO:0009986]; extracellular exosome [GO:0070062]; membrane [GO:0016020]; mitochondrial inner membrane [GO:0005743]; mitochondrial matrix [GO:0005759]; mitochondrial membrane [GO:0031966]; mitochondrial nucleoid [GO:0042645]; mitochondrial proton-transporting ATP synthase complex [GO:0005753]; mitochondrial proton-transporting ATP synthase, catalytic core [GO:0005754]; mitochondrion […	angiogenesis [GO:0001525]; ATP biosynthetic process [GO:0006754]; cellular response to interleukin-7 [GO:0098761]; generation of precursor metabolites and energy [GO:0006091]; lipid metabolic process [GO:0006629]; negative regulation of cell adhesion involved in substrate-bound cell migration [GO:0006933]; osteoblast differentiation [GO:0001649]; positive regulation of blood vessel endothelial ce…	SUBCELLULAR LOCATION: Mitochondrion inner membrane {ECO:0000269|PubMed:25168243}; Peripheral membrane protein {ECO:0000250|UniProtKB:P00829}; Matrix side {ECO:0000250|UniProtKB:P00829, ECO:0000269|PubMed:25168243}.		-3.78471	0.839427	Not significant
complex 5	P38606	ATP6V1A	V-type proton ATPase catalytic subunit A (V-ATPase subunit A) (EC 7.1.2.2) (V-ATPase 69 kDa subunit) (Vacuolar ATPase isoform VA68) (Vacuolar proton pump subunit alpha)	apical plasma membrane [GO:0016324]; clathrin-coated vesicle membrane [GO:0030665]; cytosol [GO:0005829]; endosome membrane [GO:0010008]; extracellular exosome [GO:0070062]; extrinsic component of synaptic vesicle membrane [GO:0098850]; Golgi membrane [GO:0000139]; intracellular membrane-bounded organelle [GO:0043231]; lysosomal membrane [GO:0005765]; membrane [GO:0016020]; microvillus [GO:000590…	cellular response to increased oxygen levels [GO:0036295]; endosomal lumen acidification [GO:0048388]; Golgi lumen acidification [GO:0061795]; intracellular iron ion homeostasis [GO:0006879]; intracellular pH reduction [GO:0051452]; lysosomal lumen acidification [GO:0007042]; proton transmembrane transport [GO:1902600]; regulation of macroautophagy [GO:0016241]; synaptic vesicle lumen acidificati…	SUBCELLULAR LOCATION: Cytoplasm {ECO:0000269|PubMed:29668857, ECO:0000269|PubMed:33208464}. Cytoplasm, cytosol {ECO:0000250|UniProtKB:P50516}. Cytoplasmic vesicle, secretory vesicle {ECO:0000269|PubMed:23035048}. Cytoplasmic vesicle, clathrin-coated vesicle membrane {ECO:0000250|UniProtKB:P31404}; Peripheral membrane protein {ECO:0000305}. Lysosome {ECO:0000250|UniProtKB:P50516}. Note=Co-localize…		-0.369065	0.265499	Not significant
complex 5	Q8N5M1	ATPAF2	ATP synthase mitochondrial F1 complex assembly factor 2 (ATP12 homolog)	cytosol [GO:0005829]; mitochondrion [GO:0005739]; nuclear speck [GO:0016607]	mitochondrial proton-transporting ATP synthase complex assembly [GO:0033615]; proton-transporting ATP synthase complex assembly [GO:0043461]	SUBCELLULAR LOCATION: Mitochondrion {ECO:0000305}.		0.133377	0.0661297	Not significant
complex 5	P48047	ATP5PO	ATP synthase subunit O, mitochondrial (ATP synthase peripheral stalk subunit OSCP) (Oligomycin sensitivity conferral protein) (OSCP)	mitochondrial inner membrane [GO:0005743]; mitochondrial proton-transporting ATP synthase complex [GO:0005753]; mitochondrial proton-transporting ATP synthase, stator stalk [GO:0000274]; mitochondrion [GO:0005739]; nucleus [GO:0005634]; plasma membrane [GO:0005886]; proton-transporting ATP synthase complex, catalytic core F(1) [GO:0045261]	ATP biosynthetic process [GO:0006754]; proton motive force-driven ATP synthesis [GO:0015986]; proton motive force-driven mitochondrial ATP synthesis [GO:0042776]; proton transmembrane transport [GO:1902600]	SUBCELLULAR LOCATION: Mitochondrion {ECO:0000250}. Mitochondrion inner membrane {ECO:0000250}.		0.000819466	0.000877694	Not significant
E, F and G data are provided in Supplementary Data S2

## Sheet: Fig 6
UniprotID	Gene ID	Trend (TOM20 vs STOML2)	log2FC(TOM20/STOML2:0h/0h)	log2FC(TOM20/STOML2:2h/0h)	log2FC(TOM20/STOML2:4h/0h)	log2FC(TOM20/STOML2:8h/0h)	Trend (LAMP1 vs TOM20)	log2FC(LAMP1/TOM20:0h/0h)	log2FC(LAMP1/TOM20:2h/0h)	log2FC(LAMP1/TOM20:4h/0h)	log2FC(LAMP1/TOM20:8h/0h)
O15056	SYNJ2	Decrease	0	-1.74935	-1.15319	-2.25699	Decrease	0	-0.678809	-0.640721	-1.17875
P06744	GPI	Decrease	0	-1.34213	0.510051	-1.84052	Decrease	0	-0.160812	-0.853384	-0.718562
Q5T5U3	ARHGAP21	Decrease	0	-0.596188	-0.411724	-0.832484	Decrease	0	-1.26237	-1.44948	-2.03619
Q99439	CNN2	Decrease	0	-3.39764	-2.24655	-3.24459	Decrease	0	-0.205901	-0.556672	-0.617124
P60174	TPI1	Decrease	0	-0.848693	0.0577178	-2.23141	Decrease	0	0.332776	-0.133821	-0.434896
Q8N4C8	MINK1	Decrease	0	-2.58517	-3.54295	-4.03483	Increase	0	1.67664	0.606655	1.14101
P50238	CRIP1	Decrease	0	-1.56841	-1.23459	-1.89616		0	-1.08502	-1.86593	-0.32466
Q4G0N4	NADK2	Decrease	0	-0.894744	-0.192134	-1.99866
P62937	PPIA	Decrease	0	-0.293604	0.220154	-0.500276		0	-0.960661	-1.45773	-1.8052
A0MZ66	SHTN1	Decrease	0	-0.383307	-0.158229	-0.525871		0	-0.731899	-1.05687	-1.11587
O14737	PDCD5	Decrease	0	-0.571285	-0.0420816	-0.737822		0	-0.525807	-1.42309	-1.33384
O43491	EPB41L2	Decrease	0	-0.840205	0.100156	-0.955246		0	-0.873511	-1.70261	-1.29575
P62495	ETF1	Decrease	0	-0.5308	-0.0222131	-1.1641		0	-0.488484	-0.876614	-0.894258
Q09666	AHNAK	Decrease	0	-0.401351	0.221295	-0.711256		0	-0.823731	-1.32759	-0.883542
Q12769	NUP160	Decrease	0	-1.91441	-1.72375	-2.73149		0	-0.894978	-1.72352	-1.70457
Q86W92	PPFIBP1	Decrease	0	-1.2679	-0.10711	-1.38054		0	-0.832168	-1.80351	-1.7676
Q8IVF2	AHNAK2	Decrease	0	-0.575549	0.256531	-1.03744		0	-0.770796	-1.55356	-0.907712
Q8N6T3	ARFGAP1	Decrease	0	-0.959971	-0.00155441	-1.22221		0	-0.533749	-0.879279	-0.930163
Q9NT62	ATG3	Decrease	0	-0.980887	-0.947217	-1.39577		0	-0.591103	-0.934338	-0.721604
O00571	DDX3X	Decrease	0	-1.53749	-1.73389	-1.84643		0	0.465833	-0.705207	-0.177955
O00750	PIK3C2B	Decrease	0	-1.38846	-0.726169	-1.9833		0	-0.398782	-1.75155	-0.0838512
O14745	NHERF1	Decrease	0	-1.26377	-1.0886	-2.60607		0	-0.812607	-1.62211	-0.931346
O15027	SEC16A	Decrease	0	-0.637925	-0.0201289	-0.749384		0	-0.511633	-2.00073	-0.877072
O43175	PHGDH	Decrease	0	-0.831301	-0.823672	-2.30743		0	-0.492181	-0.28568	-0.0197555
O60493	SNX3	Decrease	0	-1.16929	-1.00514	-1.06016		0	-0.789685	-1.27568	-1.21322
O60716	CTNND1	Decrease	0	-1.11661	-0.669879	-1.08486		0	-1.17089	-2.71794	-1.43873
P00338	LDHA	Decrease	0	-0.646727	0.23515	-1.13966		0	-0.849339	-1.10691	-0.731915
P04080	CSTB	Decrease	0	-1.30636	-1.65784	-1.94085		0	-0.643582	-1.48654	-0.52034
P04406	GAPDH	Decrease	0	-0.711895	-0.0555504	-1.51852		0	-0.791213	-0.602345	-0.531318
P08865	RPSA	Decrease	0	-0.949635	-0.445995	-1.9132		0	-0.352719	-2.85001	-1.56229
P23528	CFL1	Decrease	0	-2.41875	-1.542	-2.54293		0	-0.741495	-1.25576	-1.04292
P35240	NF2	Decrease	0	-1.07878	-0.592027	-1.12326		0	-0.775414	-1.04935	-1.2529
P43121	MCAM	Decrease	0	-1.83263	-1.19434	-1.48016		0	-1.2404	-2.07219	-2.44059
P50542	PEX5	Decrease	0	-1.18729	-1.05133	-2.46135		0	-0.208178	-1.24791	-0.0181079
P63244	RACK1	Decrease	0	-1.7633	-1.39824	-1.66291		0	-0.523035	-0.69503	-0.701129
P80723	BASP1	Decrease	0	-1.66516	-1.29446	-2.35166		0	-0.353083	-1.62862	-0.729338
Q02790	FKBP4	Decrease	0	-0.474657	-0.788755	-1.06647		0	-0.42178	-0.0826267	0.891809
Q14254	FLOT2	Decrease	0	-1.02539	-1.23419	-1.413		0	-0.852834	-1.56072	-1.38127
Q16512	PKN1	Decrease	0	-0.538925	-0.941474	-1.30148		0	-0.727381	-1.65987	-0.22597
Q6WKZ4	RAB11FIP1	Decrease	0	-1.77608	-1.20101	-2.07487		0	-1.51604	-2.738	-1.26664
Q7L0Y3	TRMT10C	Decrease	0	-1.01881	-1.18504	-2.57703
Q7Z3T8	ZFYVE16	Decrease	0	-1.05551	-1.87862	-1.7336		0	-0.980201	-1.16114	-0.62014
Q8NEZ2	VPS37A	Decrease	0	-1.2133	-0.842984	-1.81241		0	-0.844319	-1.59078	-1.03532
Q8WUF5	PPP1R13L	Decrease	0	-0.808598	-0.486107	-1.15718		0	-1.14584	-1.76397	-1.56492
Q8WWI1	LMO7	Decrease	0	-1.19269	-0.861016	-0.907267		0	-1.60191	-2.54967	-2.09931
Q96A19	CCDC102A	Decrease	0	-1.51259	-1.21894	-2.03744		0	-0.11037	-1.03541	-0.216722
Q96A35	MRPL24	Decrease	0	-2.26354	-2.20779	-3.30256
Q96N67	DOCK7	Decrease	0	-0.602118	-0.417909	-0.924979		0	-0.770287	-1.63179	-1.1085
Q9NYL9	TMOD3	Decrease	0	-0.730691	-0.850925	-1.29339		0	-1.48047	-1.62899	-1.19181
Q9UGP4	LIMD1	Decrease	0	-0.727187	-0.402864	-1.01045		0	-0.0288274	-0.509945	-0.182079
Q9UKF6	CPSF3	Decrease	0	-0.962482	-0.896851	-1.2902		0	-0.303357	-0.778559	-0.770861
Q9ULH0	KIDINS220	Decrease	0	-1.04198	-1.02835	-1.26094		0	-1.5126	-3.58545	-1.96539
Q9ULV4	CORO1C	Decrease	0	-0.923982	-0.696558	-1.49797		0	-0.502143	-1.02394	-0.461895
O43395	PRPF3	Increase	0	0.170399	1.0248	1.26804	Decrease	0	-1.1347	-1.66493	-2.17548
O76070	SNCG	Increase	0	-0.0841013	0.98315	1.24834	Decrease	0	-0.632189	-1.15668	-1.29853
P38117	ETFB	Increase	0	-0.488469	1.2837	2.04763	Decrease	0	0.0116223	-0.845351	-1.1165
P52272	HNRNPM	Increase	0	0.0147393	0.909664	0.784678	Decrease	0	-0.361071	-0.626011	-0.888527
P52597	HNRNPF	Increase	0	-0.293091	0.197005	0.49535	Decrease	0	-0.7505	-1.54787	-1.60762
P62316	SNRPD2	Increase	0	-0.0459312	0.892074	1.14743	Decrease	0	-0.534774	-0.927122	-1.26747
Q8IV50	LYSMD2	Increase	0	-0.434345	0.841061	0.534995	Decrease	0	-0.193217	-0.460426	-0.57787
Q9UKK9	NUDT5	Increase	0	-0.165478	0.990934	0.809454	Decrease	0	-0.0013519	-0.770253	-0.952517
Q9UL25	RAB21	Increase	0	-0.28413	0.594439	0.36197	Decrease	0	-0.715025	-1.19014	-1.51384
O75165	DNAJC13	Increase	0	0.27579	0.936288	1.56059	Decrease	0	-0.259456	-1.62232	-1.83422
P07814	EPRS1	Increase	0	0.336336	0.723391	2.45401	Decrease	0	-0.789118	-0.475338	-2.14979
P37840	SNCA	Increase	0	0.154354	1.54494	2.46035	Decrease	0	-0.802278	-0.48515	-1.38995
P40261	NNMT	Increase	0	-0.487427	0.644593	0.460857	Decrease	0	-0.139586	-0.695615	-0.868161
Q6IAA8	LAMTOR1	Increase	0	0.0286145	0.711613	0.716685	Decrease	0	-0.501803	-1.36235	-1.47852
P34897	SHMT2	Increase	0	-0.360153	0.878958	0.610607	Increase	0	0.630171	0.44118	0.552313
Q12931	TRAP1	Increase	0	-0.141844	0.976612	0.817328	Increase	0	0.931628	1.41028	1.13599
P82673	MRPS35	Increase	0	1.79061	4.97445	5.83908
Q8N163	CCAR2	Increase	0	0.0590664	0.391149	2.80311		0	-1.5872	-2.38314	-2.07034
O00203	AP3B1	Increase	0	0.18841	1.07675	1.22008		0	-0.66819	-0.972414	-1.09445
O75616	ERAL1	Increase	0	-0.169122	1.61825	1.52455
P43487	RANBP1	Increase	0	-0.105128	0.0797117	0.663708		0	-1.2529	-1.927	-1.78986
P51610	HCFC1	Increase	0	0.242104	0.767206	1.3049		0	-1.0759	-1.28153	-1.27594
P55072	VCP	Increase	0	-0.347626	0.395628	0.390408		0	-0.797573	-1.04452	-0.901125
Q5T3I0	GPATCH4	Increase	0	-0.321564	0.728974	0.643591		0	-1.11018	-1.9138	-2.05444
Q99733	NAP1L4	Increase	0	-0.298045	0.294995	0.445137		0	1.31497	-1.36534	-0.0609955
Q9NXV6	CDKN2AIP	Increase	0	-0.0289026	0.461711	1.30432		0	-1.1015	-1.58941	-1.89673
Q9UJY5	GGA1	Increase	0	-0.226575	1.57627	1.56516		0	-0.473264	-1.13453	-1.16333
Q9UMZ2	SYNRG	Increase	0	-0.236312	1.2123	0.866873		0	-0.951209	-1.82112	-1.53336
A3KMH1	VWA8	Increase	0	-0.77066	3.68969	5.46521
O00411	POLRMT	Increase	0	-0.533555	0.35969	0.753407
O15084	ANKRD28	Increase	0	-0.111271	0.223711	0.191885		0	-0.961484	-1.91694	-1.52518
O43603	GALR2	Increase	0	0.706579	1.61566	2.14087		0	0.342481	-0.253917	-0.279343
O75533	SF3B1	Increase	0	0.219842	0.399896	1.90404		0	-1.37606	-2.1492	-1.25538
O75947	ATP5PD	Increase	0	-0.449529	0.547025	0.687796		0	3.43403	0.783797	1.35354
O95163	ELP1	Increase	0	-0.174959	0.0893698	0.677254		0	-0.318984	0.279094	0.0146745
P00390	GSR	Increase	0	-0.321988	0.16308	1.0511		0	0.407738	-1.89709	0.960966
P00505	GOT2	Increase	0	0.172026	2.20151	1.87715
P05141	SLC25A5	Increase	0	0.459296	1.08623	1.51789		0	-2.05356	-2.15873	-2.1645
P05187	ALPP	Increase	0	-0.505696	0.896305	1.29112
P07477	PRSS1	Increase	0	-0.151208	1.18194	0.921753
P07737	PFN1	Increase	0	-0.143728	0.0790546	0.973718		0	-0.927218	-1.43067	-1.5713
P18065	IGFBP2	Increase	0	0.797563	0.707777	3.01928		0	-0.771165	0.141426	-0.986707
P27144	AK4	Increase	0	-0.455599	0.691358	0.877724
P28331	NDUFS1	Increase	0	1.30224	4.18384	5.44729
P29353	SHC1	Increase	0	-0.636367	1.33213	2.08769		0	-1.06502	-2.44293	-1.03433
P36969	GPX4	Increase	0	-0.0622498	1.82391	1.57796		0	1.17948	-0.490386	0.890737
P40939	HADHA	Increase	0	0.0508817	2.3874	1.89167
P47985	UQCRFS1	Increase	0	0.0694855	1.45947	1.76457
P52298	NCBP2	Increase	0	0.217423	1.1507	1.23314		0	-1.1029	-1.8308	-1.95356
P54098	POLG	Increase	0	-1.90093	-0.425797	2.23072
P62826	RAN	Increase	0	-0.175056	0.076295	0.364699		0	-1.0452	-1.45126	-0.603467
P82650	MRPS22	Increase	0	-0.309	0.98403	2.22073
Q14767	LTBP2	Increase	0	-2.41032	0.0994265	2.85517
Q16795	NDUFA9	Increase	0	0.332864	3.75878	4.12537
Q3ZCQ8	TIMM50	Increase	0	-0.343887	0.326046	0.397535
Q5VWZ2	LYPLAL1	Increase	0	-1.03133	-0.099257	1.25517		0	-0.332488	-0.310307	-0.289609
Q6YN16	HSDL2	Increase	0	-0.893811	0.973042	0.730552
Q99623	PHB2	Increase	0	0.0633984	0.918966	1.09107
Q99714	HSD17B10	Increase	0	-0.205463	1.4633	0.992637		0	0.698772	0.401033	0.1032
Q9BW91	NUDT9	Increase	0	-1.83666	0.6214	1.40308		0	-1.06088	-2.06401	-0.98224
Q9BZE1	MRPL37	Increase	0	-0.654573	0.84967	0.419346
Q9H2H9	SLC38A1	Increase	0	-0.118128	0.287644	0.579176		0	-0.930233	-1.035	-0.496522
Q9NX08	COMMD8	Increase	0	-0.372055	0.0302839	0.636057
Q9NZ45	CISD1	Increase	0	0.919811	2.69234	3.1828		0	-1.7568	-1.15686	-2.31507
Q9UI09	NDUFA12	Increase	0	-1.20324	1.10681	1.17583
Q9Y2Z2	MTO1	Increase	0	-1.10102	2.7583	2.53873
P30050	RPL12		0	0.215567	2.16893	0.724412	Decrease	0	-0.156031	-0.285327	-1.2622
P32119	PRDX2		0	1.25747	1.35689	0.65385	Decrease	0	-1.66673	-2.20279	-3.09187
P62913	RPL11		0	-0.270455	0.415804	-0.0444445	Decrease	0	-0.336536	-0.505088	-0.946067
Q9Y6N6	LAMC3						Decrease	0	0.213077	-1.39795	-1.27704
O00151	PDLIM1						Decrease	0	-0.232373	-1.54086	-1.15415
O00463	TRAF5						Decrease	0	-0.484795	-2.0167	-2.45719
O15013	ARHGEF10						Decrease	0	0.973952	-0.58485	-1.12596
O15173	PGRMC2						Decrease	0	-0.213554	-0.91615	-2.30788
O15397	IPO8						Decrease	0	-0.0649551	-1.47499	-1.3328
O15511	ARPC5						Decrease	0	-0.00679272	-1.04765	-0.84035
O75663	TIPRL						Decrease	0	-0.466583	-1.00126	-1.15842
O95671	ASMTL						Decrease	0	-0.697662	-1.96176	-2.1262
O95684	CEP43						Decrease	0	-1.08707	-1.42444	-2.02792
P00491	PNP						Decrease	0	-0.619175	-1.63256	-1.83734
P04150	NR3C1						Decrease	0	-0.956861	-1.95148	-2.36978
P15880	RPS2		0	1.24781	2.09639	1.61216	Decrease	0	-0.336161	-1.04886	-0.978685
P16083	NQO2						Decrease	0	-0.00506654	-0.6149	-0.933035
P16435	POR						Decrease	0	-0.372086	-0.479922	-1.43139
P23526	AHCY		0	0.683397	1.42574	1.14307	Decrease	0	-0.371929	-0.932571	-1.10085
P23919	DTYMK						Decrease	0	0.867223	-0.783207	-1.08089
P25786	PSMA1						Decrease	0	0.350279	-0.696566	-0.931892
P30566	ADSL						Decrease	0	-0.012438	-1.05519	-1.18995
P31943	HNRNPH1						Decrease	0	-0.850534	-0.651218	-1.17866
P31949	S100A11		0	-0.561681	-1.04453	-0.331258	Decrease	0	-0.562619	-0.672759	-0.966086
P32019	INPP5B						Decrease	0	-0.733113	-1.14883	-1.54025
P40227	CCT6A						Decrease	0	-0.492353	-0.997013	-1.07655
P47756	CAPZB						Decrease	0	-0.627428	-1.14643	-1.44081
P48634	PRRC2A						Decrease	0	-1.13023	-1.92652	-2.48788
P50402	EMD		0	-2.05334	-0.760686	-0.595132	Decrease	0	-0.661635	-2.26828	-2.10717
P51159	RAB27A						Decrease	0	-0.267252	-0.665712	-0.947023
P51648	ALDH3A2						Decrease	0	-1.06745	-2.28703	-4.49014
P54277	PMS1		0	-0.128606	1.52325	0.805184	Decrease	0	-1.36633	-1.60962	-2.17323
P61204	ARF3		0	-1.65061	-1.72202	-1.13611	Decrease	0	-0.21455	-0.996088	-1.1368
P62328	TMSB4X		0	-1.03502	0.111412	-0.510329	Decrease	0	-0.295598	-1.58605	-1.23725
Q06830	PRDX1		0	-0.576188	0.358471	0.104424	Decrease	0	-0.637056	-1.21086	-1.27153
Q13263	TRIM28						Decrease	0	-0.402012	-0.602057	-0.804609
Q15382	RHEB		0	-0.376641	0.229613	-0.423898	Decrease	0	-0.34127	-1.06397	-1.27396
Q15691	MAPRE1		0	-0.239767	1.21907	0.178215	Decrease	0	0.0685532	-1.57114	-1.75436
Q15714	TSC22D1		0	-0.629539	0.11145	-0.124393	Decrease	0	-0.349586	-1.09722	-1.08154
Q53H96	PYCR3						Decrease	0	0.680268	-0.397765	-1.02629
Q5SW79	CEP170						Decrease	0	-1.35452	-1.30355	-2.24554
Q5W0V3	FHIP2A						Decrease	0	-0.100504	-0.484307	-0.825517
Q7Z2Z2	EFL1						Decrease	0	-0.759779	-1.15253	-1.87218
Q7Z3U7	MON2						Decrease	0	-0.321141	-0.864779	-1.24641
Q8NEL9	DDHD1						Decrease	0	1.45848	-1.37516	-2.36775
Q8TEA8	DTD1						Decrease	0	-0.325453	-0.520368	-0.724673
Q96A49	SYAP1		0	-0.266193	0.25857	-0.215786	Decrease	0	-0.253626	-0.795205	-0.899067
Q96CW5	TUBGCP3						Decrease	0	-0.582606	-0.869134	-1.25153
Q99614	TTC1		0	0.240717	2.38936	1.49169	Decrease	0	-0.370268	-0.561535	-0.73995
Q9BRT9	GINS4						Decrease	0	0.585114	-0.811888	-1.3621
Q9BY44	EIF2A						Decrease	0	-1.01693	-1.67825	-2.22364
Q9NR46	SH3GLB2						Decrease	0	-0.354744	-1.54271	-1.33623
Q9NRA8	EIF4ENIF1						Decrease	0	-0.359652	-0.400674	-0.593903
Q9NXC5	MIOS						Decrease	0	-0.0179615	-0.780575	-0.787349
Q9UBK8	MTRR		0	0.0139746	1.79442	-0.319623	Decrease	0	-0.28344	-0.95698	-1.04277
Q9UK76	JPT1		0	-2.06363	-2.1989	-1.02641	Decrease	0	-0.0367073	-1.83829	-2.0664
Q9UL46	PSME2						Decrease	0	0.355564	-0.0304163	-0.334248
Q9ULC3	RAB23						Decrease	0	-0.204891	-1.00525	-0.907705
Q9Y2I7	PIKFYVE						Decrease	0	-0.493249	-0.817898	-0.989973
Q9Y617	PSAT1		0	0.213361	0.664066	0.527589	Decrease	0	-0.528914	-0.942532	-1.08571
Q9Y6B6	SAR1B						Decrease	0	0.163703	-0.556717	-0.726126
Q9Y6G5	COMMD10						Decrease	0	-0.376636	-1.35186	-1.19804
A4D1B5	GSAP		0	-1.09877	-0.668848	0.952056	Decrease	0	-0.657212	-1.18885	-1.82542
O00487	PSMD14		0	-1.94244	-1.17269	-1.14908	Decrease	0	-0.215358	-0.419194	-0.714298
O00592	PODXL						Decrease	0	-0.344224	-0.742709	-0.784571
O00767	SCD						Decrease	0	-1.17163	-1.94677	-2.46095
O14966	RAB29						Decrease	0	-0.277966	-1.01728	-1.24102
O15212	PFDN6						Decrease	0	-0.131757	-0.350168	-1.14412
O60566	BUB1B						Decrease	0	-1.52925	-2.57862	-3.30198
O75396	SEC22B		0	0.157364	1.34086	0.734736	Decrease	0	-0.940771	-1.76725	-1.89212
O75534	CSDE1						Decrease	0	-0.55684	-0.889725	-1.23248
O75694	NUP155						Decrease	0	-0.695356	-0.888575	-1.30454
O75794	CDC123						Decrease	0	-2.28952	-2.18256	-3.49708
O95336	PGLS						Decrease	0	-0.321173	-0.90423	-1.17896
O95716	RAB3D						Decrease	0	0.625967	-0.190444	-9.13967
O95861	BPNT1						Decrease	0	-0.45708	-0.427003	-2.31034
O95983	MBD3						Decrease	0	-0.656561	-2.55332	-3.0799
O96013	PAK4						Decrease	0	-0.981365	-0.325378	-1.82704
P04083	ANXA1		0	0.2445	0.982871	0.614617	Decrease	0	-0.65676	-1.02749	-1.43436
P05386	RPLP1						Decrease	0	-0.90322	-1.32821	-1.70762
P05387	RPLP2						Decrease	0	-0.161506	-2.09131	-3.26445
P06730	EIF4E						Decrease	0	-2.17329	-1.30253	-4.20928
P07195	LDHB		0	0.21199	1.45009	0.0551097	Decrease	0	-0.108314	-0.627108	-0.46712
P08133	ANXA6						Decrease	0	-0.355219	-1.20839	-1.54566
P08397	HMBS						Decrease	0	-0.221173	-1.2388	-1.21706
P0DP25	CALM3		0	-0.438519	0.208108	-0.45866	Decrease	0	-0.635105	-1.0783	-1.36748
P11021	HSPA5						Decrease	0	0.153832	-1.87037	-1.50707
P14678	SNRPB						Decrease	0	-0.969518	-1.24395	-1.73992
P16152	CBR1						Decrease	0	-0.936443	-1.35981	-2.50764
P17275	JUNB		0	0.729665	1.56188	1.28424	Decrease	0	-1.19032	-1.427	-2.21452
P17706	PTPN2						Decrease	0	-1.73456	-2.98015	-3.79989
P18206	VCL						Decrease	0	-0.0811448	-0.758625	-1.05708
P19484	TFEB						Decrease	0	-0.451119	-0.184269	-1.10257
P26447	S100A4						Decrease	0	-0.322264	-0.972906	-1.76618
P31942	HNRNPH3						Decrease	0	-0.858565	-1.52425	-1.86127
P31946	YWHAB						Decrease	0	-0.206162	-1.46298	-2.30755
P36873	PPP1CC						Decrease	0	-1.78612	-1.99244	-3.30522
P45880	VDAC2						Decrease	0	-1.31087	-1.26087	-3.1324
P46939	UTRN						Decrease	0	-0.981826	-0.376285	-1.93673
P50454	SERPINH1		0	4.82565	3.97248	5.42929	Decrease	0	-0.10729	-0.469135	-0.870073
P51157	RAB28						Decrease	0	-1.25351	-1.44666	-1.94648
P51452	DUSP3						Decrease	0	-0.985082	-1.56949	-2.11277
P52565	ARHGDIA						Decrease	0	-0.277833	-1.18025	-1.23809
P52907	CAPZA1						Decrease	0	-0.278303	-0.757452	-0.954231
P53350	PLK1						Decrease	0	-0.181877	-0.77765	-0.703411
P54578	USP14						Decrease	0	-0.0307629	-0.332771	-0.293309
P55211	CASP9						Decrease	0	0.43729	-0.715999	-1.04922
P59780	AP3S2						Decrease	0	-0.638597	-1.27926	-1.67788
P60880	SNAP25						Decrease	0	-0.377862	-1.6678	-1.52325
P61019	RAB2A						Decrease	0	-0.348085	-1.21317	-1.17018
P61106	RAB14						Decrease	0	0.0330761	-1.3132	-2.02857
P61160	ACTR2						Decrease	0	-0.0864366	-1.02477	-1.19989
P61978	HNRNPK		0	0.00731851	1.07798	0.507578	Decrease	0	-0.702544	-1.32838	-1.44565
P62263	RPS14						Decrease	0	-0.705651	-0.882963	-1.18168
P62266	RPS23						Decrease	0	-0.240867	-1.8823	-1.52852
P62306	SNRPF						Decrease	0	-0.476054	-1.26075	-1.87012
P62318	SNRPD3		0	1.32436	2.58852	2.33139	Decrease	0	-0.572695	-1.00542	-1.63497
P63313	TMSB10						Decrease	0	-0.0979011	-0.901018	-1.30598
P84243	H3-3A; H3-3B		0	-0.124376	-0.455619	-1.04435	Decrease	0	-0.659658	-0.231535	-1.07097
Q00765	REEP5						Decrease	0	-0.91214	-0.333371	-2.04176
Q01968	OCRL		0	-0.99413	-0.528561	-0.822856	Decrease	0	-0.245574	-1.73022	-1.4057
Q05655	PRKCD						Decrease	0	0.11165	-1.02038	-0.767089
Q06323	PSME1						Decrease	0	-0.0338212	-1.43996	-0.986986
Q07065	CKAP4						Decrease	0	-2.54641	-2.05577	-4.57884
Q10567	AP1B1						Decrease	0	-2.46155	-2.15719	-4.28661
Q13228	SELENBP1						Decrease	0	-0.71016	-1.35273	-1.77364
Q13480	GAB1						Decrease	0	-0.267219	-0.515605	-2.65048
Q13501	SQSTM1						Decrease	0	-0.221558	-2.36866	-1.75394
Q13546	RIPK1						Decrease	0	0.861495	-0.818688	-2.03792
Q13586	STIM1		0	0.378603	0.243208	-0.532112	Decrease	0	-0.116374	-0.586673	-0.583722
Q14974	KPNB1						Decrease	0	-1.68948	-3.38338	-3.61039
Q15847	ADIRF						Decrease	0	-0.256671	-1.53427	-1.87921
Q16555	DPYSL2		0	1.19387	1.85111	1.5926	Decrease	0	-0.371792	-0.708987	-1.19745
Q16576	RBBP7						Decrease	0	-0.443498	-1.49868	-2.00543
Q32MZ4	LRRFIP1						Decrease	0	-1.30219	-1.662	-2.31508
Q3B820	FAM161A						Decrease	0	-0.881715	-0.855034	-1.39355
Q3KQU3	MAP7D1						Decrease	0	-0.740355	-2.85572	-2.75092
Q5VU43	PDE4DIP						Decrease	0	1.31373	-1.62148	-2.89854
Q68CQ1	MROH7		0	-6.60993	2.66516	2.24506	Decrease	0	-0.7605	-0.19348	-1.52395
Q68CZ2	TNS3		0	-2.53876	-2.12037	-1.78116	Decrease	0	-0.372835	-0.406444	-1.24751
Q68DC2	ANKS6						Decrease	0	0.167665	-0.423497	-0.410335
Q6NUQ1	RINT1						Decrease	0	0.183528	-2.07202	-3.23233
Q6NXT4	SLC30A6						Decrease	0	-0.296437	-1.5144	-1.67019
Q6P158	DHX57						Decrease	0	-0.676864	-1.46826	-1.96275
Q6QNY1	BLOC1S2						Decrease	0	0.452169	-0.794535	-1.12029
Q6Y7W6	GIGYF2		0	0.575905	1.67143	1.02915	Decrease	0	-0.80219	-1.50931	-1.65048
Q6ZS30	NBEAL1						Decrease	0	0.199553	-0.308646	-0.74674
Q7L2H7	EIF3M						Decrease	0	-1.21791	-1.4393	-2.04483
Q7Z739	YTHDF3						Decrease	0	-0.966867	-0.944878	-2.09766
Q86TA1	MOB3B						Decrease	0	-0.595036	-1.27454	-2.59303
Q86UK7	ZNF598						Decrease	0	-0.511371	-1.4367	-1.7187
Q86UQ4	ABCA13						Decrease	0	0.208195	-0.112568	-2.13567
Q86XL3	ANKLE2						Decrease	0	-0.551656	-0.659463	-1.51485
Q8IW35	CEP97						Decrease	0	-1.00163	-1.66639	-2.06433
Q8IWB9	TEX2						Decrease	0	-0.0505436	-1.01729	-0.715816
Q8IWF6	DENND6A						Decrease	0	-0.134609	-1.96208	-1.72582
Q8IYD1	GSPT2						Decrease	0	0.786031	-2.99922	-3.96481
Q8N5M4	TTC9C						Decrease	0	-1.81908	-1.81614	-3.32241
Q8N961	ABTB2						Decrease	0	-1.56864	-1.3721	-2.22546
Q8N9B5	JMY						Decrease	0	-1.27362	-2.17405	-4.08806
Q8NFH3	NUP43						Decrease	0	-0.0106795	-0.150706	-1.76723
Q8TEW0	PARD3						Decrease	0	-0.456806	-4.41164	-4.2176
Q8WUH6	TMEM263		0	-0.882531	0.941007	-0.421654	Decrease	0	0.233381	-0.710018	-0.902653
Q8WVT3	TRAPPC12						Decrease	0	0.387385	-0.957636	-1.2193
Q92783	STAM						Decrease	0	-0.0945946	-0.467367	-0.492002
Q96AG4	LRRC59						Decrease	0	-0.103078	-0.631165	-0.53036
Q96AY4	TTC28						Decrease	0	-1.76563	-1.55035	-2.69231
Q96E17	RAB3C						Decrease	0	-0.509667	-11.1479	-11.9196
Q96F10	SAT2						Decrease	0	-0.458112	-0.869782	-0.962806
Q96GG9	DCUN1D1						Decrease	0	0.0634354	-1.89719	-2.03301
Q96H20	SNF8		0	-2.13826	-1.11713	-1.31219	Decrease	0	-0.295281	-0.811677	-1.49554
Q96JC1	VPS39						Decrease	0	0.806467	-0.0506783	-1.0086
Q96Q42	ALS2						Decrease	0	-1.3096	-0.914255	-4.37235
Q96RN5	MED15		0	0.626033	1.36813	0.644935	Decrease	0	-0.567878	-0.887858	-1.44279
Q96RY7	IFT140						Decrease	0	-1.10283	-2.33382	-2.46458
Q99417	MYCBP						Decrease	0	-0.725837	-2.64883	-2.40138
Q99497	PARK7						Decrease	0	-0.650899	-1.23336	-1.40608
Q99541	PLIN2						Decrease	0	0.134262	-0.469607	-0.50212
Q9BQL6	FERMT1						Decrease	0	-1.64747	-2.39117	-3.11911
Q9BV40	VAMP8						Decrease	0	-0.38245	-1.97045	-1.93066
Q9BXB4	OSBPL11						Decrease	0	-0.113029	-1.77199	-2.14876
Q9BXX3	ANKRD30A						Decrease	0	-1.04081	-1.16065	-1.76457
Q9C0D5	TANC1						Decrease	0	1.61578	-0.0960799	-1.40621
Q9H089	LSG1						Decrease	0	1.81922	-2.68925	-4.72961
Q9H2H8	PPIL3						Decrease	0	-1.04679	-1.45843	-2.20253
Q9H8Y8	GORASP2						Decrease	0	-0.834535	-2.41108	-2.86955
Q9HAU0	PLEKHA5						Decrease	0	-1.32917	-1.69228	-5.04521
Q9HD42	CHMP1A						Decrease	0	-0.224722	-2.08492	-3.67512
Q9NP61	ARFGAP3						Decrease	0	0.505813	-2.56984	-3.07204
Q9NR12	PDLIM7						Decrease	0	-0.810988	-2.2521	-2.74258
Q9NRV9	HEBP1						Decrease	0	0.75239	-0.659785	-0.961784
Q9NUY8	TBC1D23						Decrease	0	-0.536358	-0.307864	-0.781352
Q9NW64	RBM22						Decrease	0	-0.106904	-0.624659	-1.15094
Q9NXU5	ARL15						Decrease	0	-1.11806	-1.53198	-2.17105
Q9NYM9	BET1L						Decrease	0	-0.0881959	-0.682509	-1.41581
Q9NZZ3	CHMP5						Decrease	0	-0.185234	-0.926843	-1.79644
Q9P0L0	VAPA						Decrease	0	-1.26346	-2.74587	-3.54403
Q9P260	RELCH						Decrease	0	-0.842048	-0.890242	-1.82371
Q9P2E9	RRBP1						Decrease	0	0.542891	-1.16175	-1.41765
Q9P2N7	KLHL13						Decrease	0	-0.0208079	-0.22466	-0.360634
Q9UH65	SWAP70						Decrease	0	-2.33137	-2.80518	-4.17497
Q9UHV9	PFDN2						Decrease	0	-0.824626	-1.55773	-1.65244
Q9UJY4	GGA2						Decrease	0	-0.049663	-1.28264	-0.928496
Q9UKZ9	PCOLCE2						Decrease	0	-1.08857	-0.907709	-1.54188
Q9UQ80	PA2G4						Decrease	0	0.0522359	-0.592737	-2.47907
Q9Y2W1	THRAP3						Decrease	0	-0.587564	-1.51188	-2.17589
Q9Y2Z0	SUGT1						Decrease	0	-1.29317	-2.05475	-2.9757
Q9Y371	SH3GLB1						Decrease	0	-0.544691	-0.807187	-1.28928
Q9Y3B8	REXO2		0	0.786648	0.972895	0.709488	Decrease	0	-0.445186	-0.98482	-1.08975
Q9Y3I0	RTCB						Decrease	0	0.0789211	-0.176748	-0.555187
Q9Y5X3	SNX5						Decrease	0	-0.837938	-1.79689	-2.00806
Q9Y679	AUP1		0	-0.800118	0.935299	-0.940101	Decrease	0	-0.84532	-1.60951	-2.12356
Q9Y6G9	DYNC1LI1						Decrease	0	0.00650491	-1.03173	-2.5812
P05166	PCCB		0	4.56866	5.28033	4.39285	Increase	0	4.50044	4.05811	3.93069
P06576	ATP5F1B		0	2.87492	5.00369	4.78199	Increase	0	3.28549	2.97784	3.28857
P18085	ARF4						Increase	0	0.624324	1.35479	0.769204
P25705	ATP5F1A		0	2.01843	3.68375	3.1108	Increase	0	4.06949	3.37252	3.64826
A2RUB1	MEIOC						Increase	0	5.22515	4.42973	4.76798
A6NCJ1	TEKTIP1		0	-0.397128	0.537944	-0.524075	Increase	0	0.622449	0.815387	0.314505
O00231	PSMD11						Increase	0	0.882823	0.317358	1.60582
O95970	LGI1		0	-1.12187	-0.0114915	-0.704125	Increase	0	1.18089	0.66957	2.02441
P04075	ALDOA		0	-2.59784	-1.45967	-1.93048	Increase	0	0.786102	0.362825	0.845396
P08559	PDHA1		0	3.1752	5.1895	4.19488	Increase	0	1.00967	0.520549	1.06856
P10606	COX5B		0	-0.345905	0.485996	0.0999829	Increase	0	1.78652	1.50431	2.06042
P31040	SDHA		0	-2.03964	3.50646	-1.65294	Increase	0	2.30671	2.30648	3.46363
P31327	CPS1		0	3.22416	4.84397	4.33567	Increase	0	0.97359	1.01637	0.852925
P38646	HSPA9		0	1.28996	2.72069	2.3753	Increase	0	3.21972	2.8848	3.79138
Q12797	ASPH						Increase	0	2.49152	2.02262	1.93581
Q96HE7	ERO1A						Increase	0	0.758446	0.368758	0.824787
Q99962	SH3GL2						Increase	0	2.87284	2.9079	3.65386
Q9BVQ7	AFG2B						Increase	0	0.703678	0.592037	1.37167
Q9C0A1	ZFHX2						Increase	0	1.82131	1.71969	1.33994
Q9H0U4	RAB1B						Increase	0	7.1922	6.76541	7.63265
Q9H4A6	GOLPH3						Increase	0	1.5098	0.435651	1.73778
Q9NZN4	EHD2						Increase	0	1.79483	1.92699	2.61438
Q9UBP0	SPAST						Increase	0	8.80439	7.91982	8.36261
Q9Y680	FKBP7						Increase	0	1.07561	1.38508	1.00079
