# Supplementary material for: Benchmarking and Automating the Biotinylation Proteomics Workflow
Source: Research Square preprint supplement (doi:10.21203/rs.3.rs-4590410/v1), 2024-07-03
Supplement: Supplementary file 3 [file Supplementary Table S3_TurboID protein clusters (abundance and translocation) during mitochondrial damage.xlsx]

## Sheet: Table S3
UniprotID	Gene ID	Protein names	Gene Ontology (cellular component)	Gene Ontology (biological process)	Gene Ontology (molecular function)	Cluster Trend_TOM20	cluster_TOM20	log2FC(0h/0h)_TOM20	log2FC(2h/0h)_TOM20	log2FC(4h/0h)_TOM20	log2FC(8h/0h)_TOM20	Cluster Trend_LAMP1	cluster_LAMP1	log2FC(0h/0h)_LAMP1	log2FC(2h/0h)_LAMP1	log2FC(4h/0h)_LAMP1	log2FC(8h/0h)_LAMP1	Cluster Trend_STOML2	cluster_STOML2	log2FC(0h/0h)_STOML2	log2FC(2h/0h)_STOML2	log2FC(4h/0h)_STOML2	log2FC(8h/0h)_STOML2	Trend (TOM20 vs STOML2)	cluster (TOM20 vs STOML2)	log2FC(TOM20/STOML2:0h/0h)	log2FC(TOM20/STOML2:2h/0h)	log2FC(TOM20/STOML2:4h/0h)	log2FC(TOM20/STOML2:8h/0h)	Trend (LAMP1 vs TOM20)	cluster (LAMP1 vs TOM20)	log2FC(LAMP1/TOM20:0h/0h)	log2FC(LAMP1/TOM20:2h/0h)	log2FC(LAMP1/TOM20:4h/0h)	log2FC(LAMP1/TOM20:8h/0h)
O60832	DKC1	H/ACA ribonucleoprotein complex subunit DKC1 (EC 5.4.99.-) (CBF5 homolog) (Dyskerin) (Nopp140-associated protein of 57 kDa) (Nucleolar protein NAP57) (Nucleolar protein family A member 4) (snoRNP protein DKC1)	box H/ACA scaRNP complex [GO:0072589]; box H/ACA snoRNP complex [GO:0031429]; box H/ACA telomerase RNP complex [GO:0090661]; cytoplasm [GO:0005737]; fibrillar center [GO:0001650]; nucleolus [GO:0005730]; nucleoplasm [GO:0005654]; nucleus [GO:0005634]; telomerase holoenzyme complex [GO:0005697]	box H/ACA RNA 3'-end processing [GO:0000495]; enzyme-directed rRNA pseudouridine synthesis [GO:0000455]; mRNA pseudouridine synthesis [GO:1990481]; positive regulation of establishment of protein localization to telomere [GO:1904851]; positive regulation of protein localization to Cajal body [GO:1904871]; positive regulation of telomerase activity [GO:0051973]; positive regulation of telomerase R…	box H/ACA snoRNA binding [GO:0034513]; pseudouridine synthase activity [GO:0009982]; RNA binding [GO:0003723]; telomerase activity [GO:0003720]; telomerase RNA binding [GO:0070034]	Decrease	cluster 11	0	0.204247	-0.400665	-1.01575
O60841	EIF5B	Eukaryotic translation initiation factor 5B (eIF-5B) (EC 3.6.5.3) (Translation initiation factor IF-2)	cytoplasm [GO:0005737]; cytosol [GO:0005829]; mitochondrion [GO:0005739]; synapse [GO:0045202]	regulation of translational initiation [GO:0006446]; ribosome assembly [GO:0042255]; translational initiation [GO:0006413]	GTP binding [GO:0005525]; GTPase activity [GO:0003924]; metal ion binding [GO:0046872]; RNA binding [GO:0003723]; translation initiation factor activity [GO:0003743]; tRNA binding [GO:0000049]	Decrease	cluster 11	0	-1.37612	-2.28892	-4.05087
O75955	FLOT1	Flotillin-1	adherens junction [GO:0005912]; basolateral plasma membrane [GO:0016323]; caveola [GO:0005901]; cell-cell contact zone [GO:0044291]; cell-cell junction [GO:0005911]; centriolar satellite [GO:0034451]; cytoplasmic vesicle [GO:0031410]; dopaminergic synapse [GO:0098691]; early endosome [GO:0005769]; endosome [GO:0005768]; external side of plasma membrane [GO:0009897]; extracellular exosome [GO:0070…	axonogenesis [GO:0007409]; cellular response to exogenous dsRNA [GO:0071360]; dsRNA transport [GO:0033227]; extracellular matrix disassembly [GO:0022617]; plasma membrane raft assembly [GO:0044854]; plasma membrane raft organization [GO:0044857]; positive regulation of canonical NF-kappaB signal transduction [GO:0043123]; positive regulation of cell junction assembly [GO:1901890]; positive regula…	ionotropic glutamate receptor binding [GO:0035255]; protease binding [GO:0002020]	Decrease	cluster 11	0	0.0407371	-4.08061	-4.08148		cluster 10	0	-0.790418	-2.73932	-1.02044														cluster 4	0	-0.831155	1.34129	3.06104
P08574	CYC1	Cytochrome c1, heme protein, mitochondrial (EC 7.1.1.8) (Complex III subunit 4) (Complex III subunit IV) (Cytochrome b-c1 complex subunit 4) (Ubiquinol-cytochrome-c reductase complex cytochrome c1 subunit) (Cytochrome c-1)	membrane [GO:0016020]; mitochondrial inner membrane [GO:0005743]; mitochondrial respiratory chain complex III [GO:0005750]; mitochondrion [GO:0005739]; nucleus [GO:0005634]	cellular respiration [GO:0045333]; mitochondrial electron transport, ubiquinol to cytochrome c [GO:0006122]; response to glucagon [GO:0033762]	heme binding [GO:0020037]; metal ion binding [GO:0046872]; ubiquinol-cytochrome-c reductase activity [GO:0008121]	Decrease	cluster 11	0	-0.556819	-2.21332	-2.46142														cluster 10	0	0.209736	-2.90756	-1.60029
P50238	CRIP1	Cysteine-rich protein 1 (CRP-1) (Cysteine-rich heart protein) (CRHP) (hCRHP) (Cysteine-rich intestinal protein) (CRIP)	cytoplasm [GO:0005737]	cellular response to antibiotic [GO:0071236]; cellular response to UV-B [GO:0071493]; heart development [GO:0007507]; immune response [GO:0006955]; intrinsic apoptotic signaling pathway in response to DNA damage [GO:0008630]; prostate gland stromal morphogenesis [GO:0060741]; regulation of gene expression [GO:0010468]; response to organic substance [GO:0010033]; response to zinc ion [GO:0010043]	peptide binding [GO:0042277]; zinc ion binding [GO:0008270]	Decrease	cluster 11	0	-1.03857	-1.43441	-2.40814		cluster 3	0	-2.12359	-3.30034	-2.7328							Decrease	cluster 6	0	-1.56841	-1.23459	-1.89616		cluster 3	0	-1.08502	-1.86593	-0.32466
P53396	ACLY	ATP-citrate synthase (EC 2.3.3.8) (ATP-citrate (pro-S-)-lyase) (ACL) (Citrate cleavage enzyme)	azurophil granule lumen [GO:0035578]; cytosol [GO:0005829]; extracellular exosome [GO:0070062]; extracellular region [GO:0005576]; ficolin-1-rich granule lumen [GO:1904813]; membrane [GO:0016020]; nucleoplasm [GO:0005654]	acetyl-CoA biosynthetic process [GO:0006085]; cholesterol biosynthetic process [GO:0006695]; citrate metabolic process [GO:0006101]; coenzyme A metabolic process [GO:0015936]; fatty acid biosynthetic process [GO:0006633]; lipid biosynthetic process [GO:0008610]; oxaloacetate metabolic process [GO:0006107]; tricarboxylic acid cycle [GO:0006099]	ATP binding [GO:0005524]; ATP citrate synthase activity [GO:0003878]; metal ion binding [GO:0046872]	Decrease	cluster 11	0	-1.10482	-2.0021	-4.22144																				cluster 4	0	-0.254457	0.482936	1.96939
P57737	CORO7	Coronin-7 (Crn7) (70 kDa WD repeat tumor rejection antigen homolog)	cytoplasmic vesicle [GO:0031410]; cytosol [GO:0005829]; Golgi apparatus [GO:0005794]; Golgi membrane [GO:0000139]; membrane [GO:0016020]; trans-Golgi network [GO:0005802]	actin filament polymerization [GO:0030041]; cell migration [GO:0016477]; establishment of cell polarity [GO:0030010]; Golgi organization [GO:0007030]; Golgi to endosome transport [GO:0006895]; positive regulation of hippo signaling [GO:0035332]; protein transport [GO:0015031]	actin binding [GO:0003779]; actin filament binding [GO:0051015]	Decrease	cluster 11	0	-1.09329	-1.12887	-2.47198														cluster 10	0	0.208595	-0.256586	-0.987875		cluster 9	0	0.717816	-2.22259	0.355381
P57740	NUP107	Nuclear pore complex protein Nup107 (107 kDa nucleoporin) (Nucleoporin Nup107)	cytosol [GO:0005829]; kinetochore [GO:0000776]; membrane [GO:0016020]; nuclear envelope [GO:0005635]; nuclear membrane [GO:0031965]; nuclear periphery [GO:0034399]; nuclear pore [GO:0005643]; nuclear pore outer ring [GO:0031080]	female gonad development [GO:0008585]; mRNA export from nucleus [GO:0006406]; nephron development [GO:0072006]; nuclear pore complex assembly [GO:0051292]; nucleocytoplasmic transport [GO:0006913]; post-transcriptional tethering of RNA polymerase II gene DNA at nuclear periphery [GO:0000973]; protein import into nucleus [GO:0006606]	structural constituent of nuclear pore [GO:0017056]	Decrease	cluster 11	0	-0.279291	-1.50404	-1.65492																				cluster 2	0	-1.47188	-0.741109	-0.134653
Q00341	HDLBP	Vigilin (High density lipoprotein-binding protein) (HDL-binding protein)	cytoplasm [GO:0005737]; high-density lipoprotein particle [GO:0034364]; nucleus [GO:0005634]; plasma membrane [GO:0005886]	cholesterol metabolic process [GO:0008203]; lipid transport [GO:0006869]	cadherin binding [GO:0045296]; lipid binding [GO:0008289]; mRNA binding [GO:0003729]; RNA binding [GO:0003723]	Decrease	cluster 11	0	0.416352	-1.80676	-1.70718		cluster 2	0	-2.3809	-2.55741	-2.07883		cluster 10	0	-0.844166	-1.3298	-0.575822		cluster 10	0	1.26052	-0.476955	-1.13136		cluster 2	0	-2.79725	-0.750656	-0.37165
Q01518	CAP1	Adenylyl cyclase-associated protein 1 (CAP 1)	azurophil granule lumen [GO:0035578]; cortical actin cytoskeleton [GO:0030864]; cytoplasm [GO:0005737]; extracellular exosome [GO:0070062]; extracellular region [GO:0005576]; focal adhesion [GO:0005925]; plasma membrane [GO:0005886]	actin filament organization [GO:0007015]; activation of adenylate cyclase activity [GO:0007190]; ameboidal-type cell migration [GO:0001667]; cAMP-mediated signaling [GO:0019933]; cell morphogenesis [GO:0000902]; establishment or maintenance of cell polarity [GO:0007163]; receptor-mediated endocytosis [GO:0006898]; signal transduction [GO:0007165]	actin binding [GO:0003779]; adenylate cyclase binding [GO:0008179]	Decrease	cluster 11	0	-0.199836	-1.41671	-1.56197																				cluster 3	0	-3.21721	-3.73839	0.567653
Q04760	GLO1	Lactoylglutathione lyase (EC 4.4.1.5) (Aldoketomutase) (Glyoxalase I) (Glx I) (Ketone-aldehyde mutase) (Methylglyoxalase) (S-D-lactoylglutathione methylglyoxal lyase)	cytoplasm [GO:0005737]; cytosol [GO:0005829]; extracellular exosome [GO:0070062]; nucleoplasm [GO:0005654]; plasma membrane [GO:0005886]	carbohydrate metabolic process [GO:0005975]; glutathione metabolic process [GO:0006749]; methylglyoxal metabolic process [GO:0009438]; negative regulation of apoptotic process [GO:0043066]; osteoclast differentiation [GO:0030316]; regulation of transcription by RNA polymerase II [GO:0006357]	lactoylglutathione lyase activity [GO:0004462]; zinc ion binding [GO:0008270]	Decrease	cluster 11	0	-0.942567	-1.62057	-2.84273		cluster 3	0	-1.50014	-1.87271	-1.55324		cluster 10	0	-1.41813	-2.31235	-0.606055		cluster 5	0	0.475562	0.691779	-2.23667		cluster 4	0	-0.557571	-0.25214	1.28949
Q14151	SAFB2	Scaffold attachment factor B2 (SAF-B2)	cytoplasm [GO:0005737]; extracellular exosome [GO:0070062]; intracellular membrane-bounded organelle [GO:0043231]; nuclear body [GO:0016604]; nucleoplasm [GO:0005654]; nucleus [GO:0005634]	regulation of androgen receptor signaling pathway [GO:0060765]; regulation of mRNA processing [GO:0050684]; regulation of transcription by RNA polymerase II [GO:0006357]; Sertoli cell differentiation [GO:0060008]	identical protein binding [GO:0042802]; RNA binding [GO:0003723]; sequence-specific DNA binding [GO:0043565]	Decrease	cluster 11	0	-0.809035	-1.43193	-2.89026
Q14527	HLTF	Helicase-like transcription factor (EC 2.3.2.27) (EC 3.6.4.-) (DNA-binding protein/plasminogen activator inhibitor 1 regulator) (HIP116) (RING finger protein 80) (RING-type E3 ubiquitin transferase HLTF) (SWI/SNF-related matrix-associated actin-dependent regulator of chromatin subfamily A member 3) (Sucrose nonfermenting protein 2-like 3)	cytoplasm [GO:0005737]; membrane [GO:0016020]; nuclear matrix [GO:0016363]; nucleolus [GO:0005730]; nucleoplasm [GO:0005654]; nucleus [GO:0005634]; plasma membrane [GO:0005886]; RNA polymerase II transcription regulator complex [GO:0090575]	DNA repair [GO:0006281]; mRNA transcription by RNA polymerase II [GO:0042789]; positive regulation of transcription by RNA polymerase II [GO:0045944]; protein ubiquitination [GO:0016567]; regulation of neurogenesis [GO:0050767]	ATP binding [GO:0005524]; ATP-dependent activity, acting on DNA [GO:0008094]; ATP-dependent chromatin remodeler activity [GO:0140658]; DNA binding [GO:0003677]; helicase activity [GO:0004386]; hydrolase activity, acting on acid anhydrides, in phosphorus-containing anhydrides [GO:0016818]; RNA binding [GO:0003723]; ubiquitin protein ligase activity [GO:0061630]; ubiquitin protein ligase binding [G…	Decrease	cluster 11	0	0.17209	-1.20885	-2.0832
Q15751	HERC1	Probable E3 ubiquitin-protein ligase HERC1 (EC 2.3.2.26) (HECT domain and RCC1-like domain-containing protein 1) (HECT-type E3 ubiquitin transferase HERC1) (p532) (p619)	cytoplasm [GO:0005737]; cytosol [GO:0005829]; Golgi apparatus [GO:0005794]; membrane [GO:0016020]	autophagy [GO:0006914]; cerebellar Purkinje cell differentiation [GO:0021702]; corpus callosum development [GO:0022038]; negative regulation of autophagy [GO:0010507]; neuromuscular process controlling balance [GO:0050885]; neuron projection development [GO:0031175]; protein ubiquitination [GO:0016567]	guanyl-nucleotide exchange factor activity [GO:0005085]; ubiquitin-protein transferase activity [GO:0004842]	Decrease	cluster 11	0	-0.0992207	-1.16967	-1.36376
Q4G0N4	NADK2	NAD kinase 2, mitochondrial (EC 2.7.1.23) (Mitochondrial NAD kinase) (NAD kinase domain-containing protein 1, mitochondrial)	mitochondrial matrix [GO:0005759]; mitochondrion [GO:0005739]	NAD metabolic process [GO:0019674]; NADP biosynthetic process [GO:0006741]; phosphorylation [GO:0016310]	ATP binding [GO:0005524]; NAD+ kinase activity [GO:0003951]; protein homodimerization activity [GO:0042803]	Decrease	cluster 11	0	-1.29793	-1.36817	-3.35225							Decrease	cluster 1	0	-0.403186	-1.17603	-1.35359	Decrease	cluster 6	0	-0.894744	-0.192134	-1.99866
Q5VZK9	CARMIL1	F-actin-uncapping protein LRRC16A (CARMIL homolog) (Capping protein regulator and myosin 1 linker protein 1) (Capping protein, Arp2/3 and myosin-I linker homolog 1) (Capping protein, Arp2/3 and myosin-I linker protein 1) (Leucine-rich repeat-containing protein 16A)	cell leading edge [GO:0031252]; cytosol [GO:0005829]; extracellular exosome [GO:0070062]; filamentous actin [GO:0031941]; lamellipodium [GO:0030027]; macropinosome [GO:0044354]; nuclear speck [GO:0016607]; nucleoplasm [GO:0005654]; plasma membrane [GO:0005886]	actin filament network formation [GO:0051639]; actin filament organization [GO:0007015]; barbed-end actin filament uncapping [GO:0051638]; cell migration [GO:0016477]; lamellipodium assembly [GO:0030032]; macropinocytosis [GO:0044351]; negative regulation of barbed-end actin filament capping [GO:2000813]; positive regulation of actin filament polymerization [GO:0030838]; positive regulation of ce…	protein-containing complex binding [GO:0044877]	Decrease	cluster 11	0	-0.392823	-0.436648	-1.04276		cluster 3	0	-1.93102	-2.5305	-2.01524														cluster 3	0	-1.5382	-2.09386	-0.972473
Q8IYH5	ZZZ3	ZZ-type zinc finger-containing protein 3	ATAC complex [GO:0140672]; mitotic spindle [GO:0072686]; nucleolus [GO:0005730]; nucleoplasm [GO:0005654]	chromatin organization [GO:0006325]; regulation of cell cycle [GO:0051726]; regulation of cell division [GO:0051302]; regulation of DNA-templated transcription [GO:0006355]; regulation of embryonic development [GO:0045995]; regulation of transcription by RNA polymerase II [GO:0006357]; regulation of tubulin deacetylation [GO:0090043]	DNA binding [GO:0003677]; histone reader activity [GO:0140566]; lysine-acetylated histone binding [GO:0070577]; methylated histone binding [GO:0035064]; zinc ion binding [GO:0008270]	Decrease	cluster 11	0	-1.02348	-1.61783	-2.43569																				cluster 3	0	-1.53249	-2.91186	-2.03821
Q8TBN0	RAB3IL1	Guanine nucleotide exchange factor for Rab-3A (Rab-3A-interacting-like protein 1) (Rab3A-interacting-like protein 1) (Rabin3-like 1)	cytosol [GO:0005829]; Golgi to plasma membrane transport vesicle [GO:0070319]	exocytosis [GO:0006887]; protein transport [GO:0015031]	guanyl-nucleotide exchange factor activity [GO:0005085]; identical protein binding [GO:0042802]	Decrease	cluster 11	0	0.0574375	-0.312724	-0.391947
Q92665	MRPS31	Small ribosomal subunit protein mS31 (28S ribosomal protein S31, mitochondrial) (MRP-S31) (S31mt) (Imogen 38)	mitochondrial inner membrane [GO:0005743]; mitochondrial small ribosomal subunit [GO:0005763]; mitochondrion [GO:0005739]; nucleolus [GO:0005730]	mitochondrial translation [GO:0032543]	protein domain specific binding [GO:0019904]; RNA binding [GO:0003723]; structural constituent of ribosome [GO:0003735]	Decrease	cluster 11	0	-0.587017	-1.4163	-2.68177		cluster 2	0	-2.13762	-1.25175	-2.5624	Decrease	cluster 1	0	-0.943064	-1.91523	-2.30054		cluster 5	0	0.356047	0.498922	-0.381237		cluster 4	0	-1.55061	0.16455	0.119377
Q96CP2	FLYWCH2	FLYWCH family member 2			RNA binding [GO:0003723]	Decrease	cluster 11	0	-0.359886	-0.734186	-1.13345
Q96EE3	SEH1L	Nucleoporin SEH1 (GATOR2 complex protein SEH1) (Nup107-160 subcomplex subunit SEH1) (SEC13-like protein)	cytosol [GO:0005829]; GATOR2 complex [GO:0061700]; kinetochore [GO:0000776]; lysosomal membrane [GO:0005765]; nuclear envelope [GO:0005635]; nuclear pore [GO:0005643]; nuclear pore outer ring [GO:0031080]; Seh1-associated complex [GO:0035859]	attachment of mitotic spindle microtubules to kinetochore [GO:0051315]; cell division [GO:0051301]; cellular response to amino acid starvation [GO:0034198]; cellular response to nutrient levels [GO:0031669]; defense response to Gram-positive bacterium [GO:0050830]; mitotic metaphase chromosome alignment [GO:0007080]; mRNA transport [GO:0051028]; negative regulation of TORC1 signaling [GO:1904262]…	structural molecule activity [GO:0005198]	Decrease	cluster 11	0	-0.576854	-0.639342	-1.46136
Q96R06	SPAG5	Sperm-associated antigen 5 (Astrin) (Deepest) (Mitotic spindle-associated protein p126) (MAP126)	centriolar satellite [GO:0034451]; ciliary basal body [GO:0036064]; ciliary rootlet [GO:0035253]; cytoplasm [GO:0005737]; cytosol [GO:0005829]; kinetochore [GO:0000776]; microtubule plus-end [GO:0035371]; midbody [GO:0030496]; mitotic spindle [GO:0072686]; mitotic spindle pole [GO:0097431]; nuclear body [GO:0016604]	cell division [GO:0051301]; chromosome segregation [GO:0007059]; establishment of spindle orientation [GO:0051294]; mitotic sister chromatid segregation [GO:0000070]; positive regulation of intracellular transport [GO:0032388]; positive regulation of spindle assembly [GO:1905832]; protein localization to centrosome [GO:0071539]; regulation of attachment of spindle microtubules to kinetochore [GO:…	microtubule binding [GO:0008017]	Decrease	cluster 11	0	-0.532276	-1.0739	-1.93543
Q99707	MTR	Methionine synthase (MS) (EC 2.1.1.13) (5-methyltetrahydrofolate--homocysteine methyltransferase) (Cobalamin-dependent methionine synthase) (Vitamin-B12 dependent methionine synthase)	cytosol [GO:0005829]	axon regeneration [GO:0031103]; cellular response to nitric oxide [GO:0071732]; cobalamin metabolic process [GO:0009235]; homocysteine metabolic process [GO:0050667]; methionine biosynthetic process [GO:0009086]; methylation [GO:0032259]; nervous system development [GO:0007399]; response to axon injury [GO:0048678]; tetrahydrofolate metabolic process [GO:0046653]	cobalamin binding [GO:0031419]; methionine synthase activity [GO:0008705]; zinc ion binding [GO:0008270]	Decrease	cluster 11	0	-0.461315	-4.12338	-4.91824
Q9H6T3	RPAP3	RNA polymerase II-associated protein 3	cytosol [GO:0005829]; protein folding chaperone complex [GO:0101031]; R2TP complex [GO:0097255]; RPAP3/R2TP/prefoldin-like complex [GO:1990062]	protein stabilization [GO:0050821]		Decrease	cluster 11	0	0.496836	-0.696696	-0.600394														cluster 10	0	1.3952	-0.284797	0.187189		cluster 2	0	-2.52335	-1.85713	-1.23346
Q9H845	ACAD9	Complex I assembly factor ACAD9, mitochondrial (Acyl-CoA dehydrogenase family member 9) (ACAD-9) (EC 1.3.8.-)	dendrite [GO:0030425]; mitochondrial inner membrane [GO:0005743]; mitochondrial membrane [GO:0031966]; mitochondrion [GO:0005739]; nucleus [GO:0005634]	leucine catabolic process [GO:0006552]; long-chain fatty acid metabolic process [GO:0001676]; medium-chain fatty acid metabolic process [GO:0051791]; mitochondrial respiratory chain complex I assembly [GO:0032981]	acyl-CoA dehydrogenase activity [GO:0003995]; flavin adenine dinucleotide binding [GO:0050660]; isovaleryl-CoA dehydrogenase activity [GO:0008470]; long-chain fatty acyl-CoA dehydrogenase activity [GO:0004466]; medium-chain fatty acyl-CoA dehydrogenase activity [GO:0070991]	Decrease	cluster 11	0	-0.640284	-0.913146	-1.43256							Decrease	cluster 1	0	-0.894308	-1.98936	-2.01554		cluster 2	0	0.254024	1.07621	0.582976
Q9UNH7	SNX6	Sorting nexin-6 (TRAF4-associated factor 2) [Cleaved into: Sorting nexin-6, N-terminally processed]	cytoplasm [GO:0005737]; cytosol [GO:0005829]; early endosome membrane [GO:0031901]; endosome [GO:0005768]; glutamatergic synapse [GO:0098978]; lysosome [GO:0005764]; nucleus [GO:0005634]; retromer complex [GO:0030904]; retromer, tubulation complex [GO:0030905]; tubular endosome [GO:0097422]	cellular response to amyloid-beta [GO:1904646]; cellular response to epidermal growth factor stimulus [GO:0071364]; intracellular protein transport [GO:0006886]; negative regulation of DNA-templated transcription [GO:0045892]; negative regulation of epidermal growth factor-activated receptor activity [GO:0007175]; negative regulation of neuron apoptotic process [GO:0043524]; negative regulation o…	dynactin binding [GO:0034452]; phosphatidylinositol binding [GO:0035091]; protein homodimerization activity [GO:0042803]; type I transforming growth factor beta receptor binding [GO:0034713]	Decrease	cluster 11	0	0.434493	-1.57687	-0.923273		cluster 10	0	-0.876771	-4.35314	-1.68348														cluster 3	0	-1.31126	-2.77626	-0.760204
Q9UNY4	TTF2	Transcription termination factor 2 (EC 3.6.4.-) (Lodestar homolog) (RNA polymerase II termination factor) (Transcription release factor 2) (F2) (HuF2)	cytosol [GO:0005829]; nucleus [GO:0005634]; spliceosomal complex [GO:0005681]; transcription elongation factor complex [GO:0008023]	DNA repair [GO:0006281]; DNA-templated transcription termination [GO:0006353]; mRNA processing [GO:0006397]; RNA splicing [GO:0008380]; termination of RNA polymerase II transcription [GO:0006369]	ATP binding [GO:0005524]; ATP-dependent activity, acting on DNA [GO:0008094]; ATP-dependent chromatin remodeler activity [GO:0140658]; DNA binding [GO:0003677]; helicase activity [GO:0004386]; hydrolase activity [GO:0016787]; zinc ion binding [GO:0008270]	Decrease	cluster 11	0	0.386252	-0.659258	-0.881847		cluster 2	0	-4.35504	-4.28906	-4.00784														cluster 2	0	-4.74129	-3.62981	-3.12599
O14513	NCKAP5	Nck-associated protein 5 (NAP-5) (Peripheral clock protein)	microtubule plus-end [GO:0035371]	microtubule bundle formation [GO:0001578]; microtubule depolymerization [GO:0007019]		Increase	cluster 5	0	0.685695	0.841167	0.791351		cluster 9	0	0.344636	0.232256	0.322872		cluster 9	0	-0.124712	-0.253765	0.292393		cluster 1	0	0.810407	1.09493	0.498958		cluster 3	0	-0.341058	-0.608911	-0.468478
O15371	EIF3D	Eukaryotic translation initiation factor 3 subunit D (eIF3d) (Eukaryotic translation initiation factor 3 subunit 7) (eIF-3-zeta) (eIF3 p66)	cytosol [GO:0005829]; eukaryotic 43S preinitiation complex [GO:0016282]; eukaryotic 48S preinitiation complex [GO:0033290]; eukaryotic translation initiation factor 3 complex [GO:0005852]; eukaryotic translation initiation factor 3 complex, eIF3m [GO:0071541]; membrane [GO:0016020]; synapse [GO:0045202]	cap-dependent translational initiation [GO:0002191]; formation of cytoplasmic translation initiation complex [GO:0001732]; IRES-dependent viral translational initiation [GO:0075522]; positive regulation of mRNA binding [GO:1902416]; positive regulation of translation [GO:0045727]; translational initiation [GO:0006413]; viral translational termination-reinitiation [GO:0075525]	mRNA cap binding [GO:0098808]; RNA binding [GO:0003723]; translation initiation factor activity [GO:0003743]	Increase	cluster 5	0	0.737453	1.54121	0.968152
O60825	PFKFB2	6-phosphofructo-2-kinase/fructose-2,6-bisphosphatase 2 (6PF-2-K/Fru-2,6-P2ase 2) (PFK/FBPase 2) (6PF-2-K/Fru-2,6-P2ase heart-type isozyme) [Includes: 6-phosphofructo-2-kinase (EC 2.7.1.105); Fructose-2,6-bisphosphatase (EC 3.1.3.46)]	cytosol [GO:0005829]; nucleoplasm [GO:0005654]	fructose 2,6-bisphosphate metabolic process [GO:0006003]; fructose metabolic process [GO:0006000]; glucose catabolic process [GO:0006007]; glycolytic process [GO:0006096]; lactate metabolic process [GO:0006089]; positive regulation of insulin secretion [GO:0032024]; response to glucose [GO:0009749]	6-phosphofructo-2-kinase activity [GO:0003873]; ATP binding [GO:0005524]; fructose-2,6-bisphosphate 2-phosphatase activity [GO:0004331]; protein kinase binding [GO:0019901]	Increase	cluster 5	0	1.95565	2.74076	2.3411
O75390	CS	Citrate synthase, mitochondrial (EC 2.3.3.1) (Citrate (Si)-synthase)	extracellular exosome [GO:0070062]; mitochondrial matrix [GO:0005759]; mitochondrion [GO:0005739]; nucleus [GO:0005634]	carbohydrate metabolic process [GO:0005975]; citrate metabolic process [GO:0006101]; tricarboxylic acid cycle [GO:0006099]	citrate (Si)-synthase activity [GO:0004108]; RNA binding [GO:0003723]	Increase	cluster 5	0	3.78402	4.65765	4.97754														cluster 1	0	6.62532	8.26339	8.07443
O95202	LETM1	Mitochondrial proton/calcium exchanger protein (Electroneutral mitochondrial K(+)/H(+)exchanger) (KHE) (Leucine zipper-EF-hand-containing transmembrane protein 1)	mitochondrial inner membrane [GO:0005743]; mitochondrion [GO:0005739]	calcium export from the mitochondrion [GO:0099093]; calcium ion transport [GO:0006816]; cristae formation [GO:0042407]; inner mitochondrial membrane organization [GO:0007007]; mitochondrial calcium ion homeostasis [GO:0051560]; mitochondrial calcium ion transmembrane transport [GO:0006851]; mitochondrial potassium ion transmembrane transport [GO:0140141]; negative regulation of mitochondrial calc…	calcium ion binding [GO:0005509]; calcium:proton antiporter activity [GO:0015369]; ribosome binding [GO:0043022]	Increase	cluster 5	0	1.41033	1.70097	1.72495								cluster 8	0	0.564418	-0.525538	-0.108882		cluster 1	0	0.845915	2.22651	1.83383
P05166	PCCB	Propionyl-CoA carboxylase beta chain, mitochondrial (PCCase subunit beta) (EC 6.4.1.3) (Propanoyl-CoA:carbon dioxide ligase subunit beta)	catalytic complex [GO:1902494]; cytosol [GO:0005829]; mitochondrial matrix [GO:0005759]; mitochondrion [GO:0005739]	branched-chain amino acid metabolic process [GO:0009081]; fatty acid metabolic process [GO:0006631]; short-chain fatty acid catabolic process [GO:0019626]	ATP binding [GO:0005524]; propionyl-CoA carboxylase activity [GO:0004658]	Increase	cluster 5	0	0.878386	1.69953	1.43357								cluster 3	0	-3.69027	-3.58081	-2.95928		cluster 1	0	4.56866	5.28033	4.39285	Increase	cluster 6	0	4.50044	4.05811	3.93069
P05388	RPLP0	Large ribosomal subunit protein uL10 (60S acidic ribosomal protein P0) (60S ribosomal protein L10E)	cytoplasm [GO:0005737]; cytoplasmic ribonucleoprotein granule [GO:0036464]; cytosol [GO:0005829]; cytosolic large ribosomal subunit [GO:0022625]; cytosolic ribosome [GO:0022626]; endoplasmic reticulum [GO:0005783]; extracellular exosome [GO:0070062]; focal adhesion [GO:0005925]; membrane [GO:0016020]; nucleus [GO:0005634]; postsynapse [GO:0098794]; postsynaptic density [GO:0014069]; ribonucleopro…	cytoplasmic translation [GO:0002181]; ribosome biogenesis [GO:0042254]; translation [GO:0006412]	large ribosomal subunit rRNA binding [GO:0070180]; RNA binding [GO:0003723]; structural constituent of ribosome [GO:0003735]	Increase	cluster 5	0	0.0533132	0.994545	1.3468		cluster 12	0	-1.13427	-0.281127	0.182395		cluster 2	0	1.2481	1.59672	0.324473		cluster 8	0	-1.19479	-0.602171	1.02233		cluster 3	0	-1.18758	-1.27567	-1.1644
P06576	ATP5F1B	ATP synthase subunit beta, mitochondrial (EC 7.1.2.2) (ATP synthase F1 subunit beta)	cell surface [GO:0009986]; extracellular exosome [GO:0070062]; membrane [GO:0016020]; mitochondrial inner membrane [GO:0005743]; mitochondrial matrix [GO:0005759]; mitochondrial membrane [GO:0031966]; mitochondrial nucleoid [GO:0042645]; mitochondrial proton-transporting ATP synthase complex [GO:0005753]; mitochondrial proton-transporting ATP synthase, catalytic core [GO:0005754]; mitochondrion […	angiogenesis [GO:0001525]; ATP biosynthetic process [GO:0006754]; cellular response to interleukin-7 [GO:0098761]; generation of precursor metabolites and energy [GO:0006091]; lipid metabolic process [GO:0006629]; negative regulation of cell adhesion involved in substrate-bound cell migration [GO:0006933]; osteoblast differentiation [GO:0001649]; positive regulation of blood vessel endothelial ce…	angiostatin binding [GO:0043532]; ATP binding [GO:0005524]; ATP hydrolysis activity [GO:0016887]; MHC class I protein binding [GO:0042288]; proton-transporting ATP synthase activity, rotational mechanism [GO:0046933]; proton-transporting ATPase activity, rotational mechanism [GO:0046961]	Increase	cluster 5	0	0.0528657	0.891682	0.997285							Decrease	cluster 1	0	-2.82205	-4.11201	-3.78471		cluster 1	0	2.87492	5.00369	4.78199	Increase	cluster 6	0	3.28549	2.97784	3.28857
P07910	HNRNPC	Heterogeneous nuclear ribonucleoproteins C1/C2 (hnRNP C1/C2)	actin cytoskeleton [GO:0015629]; catalytic step 2 spliceosome [GO:0071013]; chromatin [GO:0000785]; cytosol [GO:0005829]; extracellular exosome [GO:0070062]; extracellular region [GO:0005576]; membrane [GO:0016020]; nucleoplasm [GO:0005654]; nucleus [GO:0005634]; protein-containing complex [GO:0032991]; spliceosomal complex [GO:0005681]; telomerase holoenzyme complex [GO:0005697]	3'-UTR-mediated mRNA stabilization [GO:0070935]; chromatin remodeling [GO:0006338]; mRNA splicing, via spliceosome [GO:0000398]; negative regulation of telomere maintenance via telomerase [GO:0032211]; osteoblast differentiation [GO:0001649]; RNA splicing [GO:0008380]	identical protein binding [GO:0042802]; mRNA 3'-UTR binding [GO:0003730]; N6-methyladenosine-containing RNA reader activity [GO:1990247]; nucleosomal DNA binding [GO:0031492]; poly(U) RNA binding [GO:0008266]; RNA binding [GO:0003723]; telomerase RNA binding [GO:0070034]	Increase	cluster 5	0	0.1106	1.14481	1.25041																				cluster 7	0	-1.98346	-2.05345	-2.73359
P08243	ASNS	Asparagine synthetase [glutamine-hydrolyzing] (EC 6.3.5.4) (Cell cycle control protein TS11) (Glutamine-dependent asparagine synthetase)	cytosol [GO:0005829]	asparagine biosynthetic process [GO:0006529]; cellular response to glucose starvation [GO:0042149]; glutamine metabolic process [GO:0006541]; L-asparagine biosynthetic process [GO:0070981]; negative regulation of apoptotic process [GO:0043066]; positive regulation of mitotic cell cycle [GO:0045931]	asparagine synthase (glutamine-hydrolyzing) activity [GO:0004066]; ATP binding [GO:0005524]	Increase	cluster 5	0	-0.0318892	0.74456	0.51389		cluster 2	0	-1.86702	-2.11213	-1.58135								cluster 5	0	1.49389	2.05587	0.214692		cluster 3	0	-1.83513	-2.85669	-2.09524
P11441	UBL4A	Ubiquitin-like protein 4A (Ubiquitin-like protein GDX)	BAT3 complex [GO:0071818]; cytoplasm [GO:0005737]; cytosol [GO:0005829]; membrane [GO:0016020]; nucleoplasm [GO:0005654]; nucleus [GO:0005634]	post-translational protein targeting to endoplasmic reticulum membrane [GO:0006620]; protein modification process [GO:0036211]; regulation of protein stability [GO:0031647]; tail-anchored membrane protein insertion into ER membrane [GO:0071816]; ubiquitin-dependent protein catabolic process [GO:0006511]	protein-folding chaperone binding [GO:0051087]; ubiquitin-like protein transferase activity [GO:0019787]	Increase	cluster 5	0	-0.0164327	0.693799	0.739148		cluster 3	0	-1.00428	-1.32051	-1.08657														cluster 3	0	-0.987851	-2.01431	-1.82572
P18085	ARF4	ADP-ribosylation factor 4	cytosol [GO:0005829]; dendritic spine [GO:0043197]; extracellular exosome [GO:0070062]; glutamatergic synapse [GO:0098978]; Golgi membrane [GO:0000139]; membrane [GO:0016020]; plasma membrane [GO:0005886]; ruffle membrane [GO:0032587]	apical protein localization [GO:0045176]; cell migration [GO:0016477]; cilium assembly [GO:0060271]; dendritic spine development [GO:0060996]; endoplasmic reticulum to Golgi vesicle-mediated transport [GO:0006888]; establishment or maintenance of epithelial cell apical/basal polarity [GO:0045197]; intracellular protein transport [GO:0006886]; learning [GO:0007612]; negative regulation of apoptoti…	epidermal growth factor receptor binding [GO:0005154]; GTP binding [GO:0005525]; GTPase activity [GO:0003924]; guanyl-nucleotide exchange factor activity [GO:0005085]; NAD+-protein-arginine ADP-ribosyltransferase activity [GO:0106274]; phospholipase D activator activity [GO:1990583]	Increase	cluster 5	0	0.0904356	0.474222	0.432279		cluster 6	0	0.71476	1.82901	1.20148													Increase	cluster 6	0	0.624324	1.35479	0.769204
P25705	ATP5F1A	ATP synthase subunit alpha, mitochondrial (ATP synthase F1 subunit alpha)	cell surface [GO:0009986]; extracellular exosome [GO:0070062]; membrane [GO:0016020]; membrane raft [GO:0045121]; mitochondrial inner membrane [GO:0005743]; mitochondrial matrix [GO:0005759]; mitochondrial proton-transporting ATP synthase complex [GO:0005753]; mitochondrial proton-transporting ATP synthase, catalytic core [GO:0005754]; mitochondrion [GO:0005739]; plasma membrane [GO:0005886]; pro…	ATP biosynthetic process [GO:0006754]; cellular response to dexamethasone stimulus [GO:0071549]; cellular response to nitric oxide [GO:0071732]; lipid metabolic process [GO:0006629]; negative regulation of endothelial cell proliferation [GO:0001937]; positive regulation of blood vessel endothelial cell migration [GO:0043536]; proton motive force-driven ATP synthesis [GO:0015986]; proton motive fo…	ADP binding [GO:0043531]; angiostatin binding [GO:0043532]; ATP binding [GO:0005524]; ATP hydrolysis activity [GO:0016887]; MHC class I protein binding [GO:0042288]; protease binding [GO:0002020]; proton-transporting ATP synthase activity, rotational mechanism [GO:0046933]; RNA binding [GO:0003723]	Increase	cluster 5	0	1.50569	2.09533	1.6451							Decrease	cluster 1	0	-0.512738	-1.58842	-1.46569		cluster 1	0	2.01843	3.68375	3.1108	Increase	cluster 6	0	4.06949	3.37252	3.64826
P27708	CAD	Multifunctional protein CAD (Carbamoyl phosphate synthetase 2-aspartate transcarbamylase-dihydroorotase) [Includes: Glutamine-dependent carbamoyl phosphate synthase (EC 6.3.5.5); Glutamine amidotransferase (GATase) (GLNase) (EC 3.5.1.2); Ammonium-dependent carbamoyl phosphate synthase (CPS) (CPSase) (EC 6.3.4.16); Aspartate carbamoyltransferase (EC 2.1.3.2); Dihydroorotase (EC 3.5.2.3)]	cell projection [GO:0042995]; cytoplasm [GO:0005737]; cytosol [GO:0005829]; extracellular exosome [GO:0070062]; membrane [GO:0016020]; neuronal cell body [GO:0043025]; nuclear matrix [GO:0016363]; nucleus [GO:0005634]; protein-containing complex [GO:0032991]; terminal bouton [GO:0043195]	'de novo' pyrimidine nucleobase biosynthetic process [GO:0006207]; 'de novo' UMP biosynthetic process [GO:0044205]; animal organ regeneration [GO:0031100]; cellular response to epidermal growth factor stimulus [GO:0071364]; citrulline biosynthetic process [GO:0019240]; female pregnancy [GO:0007565]; glutamine metabolic process [GO:0006541]; heart development [GO:0007507]; lactation [GO:0007595]; …	aspartate binding [GO:0070335]; aspartate carbamoyltransferase activity [GO:0004070]; ATP binding [GO:0005524]; carbamoyl-phosphate synthase (ammonia) activity [GO:0004087]; carbamoyl-phosphate synthase (glutamine-hydrolyzing) activity [GO:0004088]; dihydroorotase activity [GO:0004151]; enzyme binding [GO:0019899]; glutaminase activity [GO:0004359]; identical protein binding [GO:0042802]; protein…	Increase	cluster 5	0	0.46316	1.00064	1.52865																				cluster 3	0	-1.36134	-1.46597	-1.37763
P30044	PRDX5	Peroxiredoxin-5, mitochondrial (EC 1.11.1.24) (Alu corepressor 1) (Antioxidant enzyme B166) (AOEB166) (Liver tissue 2D-page spot 71B) (PLP) (Peroxiredoxin V) (Prx-V) (Peroxisomal antioxidant enzyme) (TPx type VI) (Thioredoxin peroxidase PMP20) (Thioredoxin-dependent peroxiredoxin 5)	cytoplasm [GO:0005737]; cytoplasmic vesicle [GO:0031410]; cytosol [GO:0005829]; extracellular exosome [GO:0070062]; extracellular space [GO:0005615]; intracellular membrane-bounded organelle [GO:0043231]; mitochondrial matrix [GO:0005759]; mitochondrion [GO:0005739]; nucleus [GO:0005634]; perinuclear region of cytoplasm [GO:0048471]; peroxisomal matrix [GO:0005782]; peroxisome [GO:0005777]	cell redox homeostasis [GO:0045454]; cellular response to oxidative stress [GO:0034599]; cellular response to reactive oxygen species [GO:0034614]; hydrogen peroxide catabolic process [GO:0042744]; inflammatory response [GO:0006954]; NADPH oxidation [GO:0070995]; negative regulation of apoptotic process [GO:0043066]; negative regulation of oxidoreductase activity [GO:0051354]; negative regulation…	antioxidant activity [GO:0016209]; cysteine-type endopeptidase inhibitor activity involved in apoptotic process [GO:0043027]; identical protein binding [GO:0042802]; peroxidase activity [GO:0004601]; peroxynitrite reductase activity [GO:0072541]; RNA polymerase III transcription regulatory region sequence-specific DNA binding [GO:0001016]; signaling receptor binding [GO:0005102]; thioredoxin pero…	Increase	cluster 5	0	1.2962	1.1911	1.43679
P30050	RPL12	Large ribosomal subunit protein uL11 (60S ribosomal protein L12)	cytoplasm [GO:0005737]; cytosol [GO:0005829]; cytosolic large ribosomal subunit [GO:0022625]; cytosolic ribosome [GO:0022626]; extracellular exosome [GO:0070062]; focal adhesion [GO:0005925]; membrane [GO:0016020]; nucleolus [GO:0005730]; postsynaptic density [GO:0014069]	cytoplasmic translation [GO:0002181]; translation [GO:0006412]	large ribosomal subunit rRNA binding [GO:0070180]; RNA binding [GO:0003723]; structural constituent of ribosome [GO:0003735]	Increase	cluster 5	0	0.297388	0.565472	0.632546														cluster 2	0	0.215567	2.16893	0.724412	Decrease	cluster 1	0	-0.156031	-0.285327	-1.2622
P30086	PEBP1	Phosphatidylethanolamine-binding protein 1 (PEBP-1) (HCNPpp) (Neuropolypeptide h3) (Prostatic-binding protein) (Raf kinase inhibitor protein) (RKIP) [Cleaved into: Hippocampal cholinergic neurostimulating peptide (HCNP)]	cytosol [GO:0005829]; extracellular exosome [GO:0070062]; nucleus [GO:0005634]	negative regulation of MAPK cascade [GO:0043409]	ATP binding [GO:0005524]; enzyme binding [GO:0019899]; phosphatidylethanolamine binding [GO:0008429]; protein kinase binding [GO:0019901]; RNA binding [GO:0003723]; serine-type endopeptidase inhibitor activity [GO:0004867]	Increase	cluster 5	0	2.04773	2.99045	2.825		cluster 9	0	0.877639	0.667125	0.945773														cluster 3	0	-1.17009	-2.32332	-1.87923
P31930	UQCRC1	Cytochrome b-c1 complex subunit 1, mitochondrial (Complex III subunit 1) (Core protein I) (Ubiquinol-cytochrome-c reductase complex core protein 1)	mitochondrial inner membrane [GO:0005743]; mitochondrial respirasome [GO:0005746]; mitochondrial respiratory chain complex III [GO:0005750]; mitochondrion [GO:0005739]	aerobic respiration [GO:0009060]; cellular respiration [GO:0045333]; mitochondrial electron transport, ubiquinol to cytochrome c [GO:0006122]; oxidative phosphorylation [GO:0006119]; response to activity [GO:0014823]; response to alkaloid [GO:0043279]	metal ion binding [GO:0046872]; protein-containing complex binding [GO:0044877]; ubiquinol-cytochrome-c reductase activity [GO:0008121]; ubiquitin protein ligase binding [GO:0031625]	Increase	cluster 5	0	5.71089	6.49996	6.06015
P32119	PRDX2	Peroxiredoxin-2 (EC 1.11.1.24) (Natural killer cell-enhancing factor B) (NKEF-B) (PRP) (Thiol-specific antioxidant protein) (TSA) (Thioredoxin peroxidase 1) (Thioredoxin-dependent peroxide reductase 1) (Thioredoxin-dependent peroxiredoxin 2)	cytoplasm [GO:0005737]; cytosol [GO:0005829]; extracellular exosome [GO:0070062]	cell redox homeostasis [GO:0045454]; cellular response to oxidative stress [GO:0034599]; defense response to tumor cell [GO:0002357]; extrinsic apoptotic signaling pathway [GO:0097191]; hydrogen peroxide catabolic process [GO:0042744]; leukocyte activation [GO:0045321]; negative regulation of apoptotic process [GO:0043066]; negative regulation of extrinsic apoptotic signaling pathway in absence o…	antioxidant activity [GO:0016209]; thioredoxin peroxidase activity [GO:0008379]	Increase	cluster 5	0	0.20834	0.559536	1.12906		cluster 3	0	-1.45839	-1.64325	-1.96281								cluster 1	0	1.25747	1.35689	0.65385	Decrease	cluster 1	0	-1.66673	-2.20279	-3.09187
P35237	SERPINB6	Serpin B6 (Cytoplasmic antiproteinase) (CAP) (Peptidase inhibitor 6) (PI-6) (Placental thrombin inhibitor)	collagen-containing extracellular matrix [GO:0062023]; cytoplasm [GO:0005737]; cytosol [GO:0005829]; extracellular exosome [GO:0070062]; extracellular region [GO:0005576]; extracellular space [GO:0005615]; ficolin-1-rich granule membrane [GO:0101003]; plasma membrane [GO:0005886]; secretory granule membrane [GO:0030667]; serine protease inhibitor complex [GO:0097180]; tertiary granule membrane [G…	cellular response to osmotic stress [GO:0071470]; negative regulation of endopeptidase activity [GO:0010951]; sensory perception of sound [GO:0007605]	protease binding [GO:0002020]; serine-type endopeptidase inhibitor activity [GO:0004867]	Increase	cluster 5	0	0.302887	0.833941	0.930344		cluster 8	0	-0.582714	-1.70432	0.241411														cluster 3	0	-0.885601	-2.53827	-0.688933
P49748	ACADVL	Very long-chain specific acyl-CoA dehydrogenase, mitochondrial (VLCAD) (EC 1.3.8.9)	mitochondrial inner membrane [GO:0005743]; mitochondrial matrix [GO:0005759]; mitochondrial membrane [GO:0031966]; mitochondrial nucleoid [GO:0042645]; mitochondrion [GO:0005739]; nucleolus [GO:0005730]; nucleoplasm [GO:0005654]	energy derivation by oxidation of organic compounds [GO:0015980]; epithelial cell differentiation [GO:0030855]; fatty acid beta-oxidation using acyl-CoA dehydrogenase [GO:0033539]; negative regulation of fatty acid biosynthetic process [GO:0045717]; negative regulation of fatty acid oxidation [GO:0046322]; regulation of cholesterol metabolic process [GO:0090181]; response to cold [GO:0009409]; te…	acyl-CoA dehydrogenase activity [GO:0003995]; fatty-acyl-CoA binding [GO:0000062]; flavin adenine dinucleotide binding [GO:0050660]; identical protein binding [GO:0042802]; long-chain fatty acyl-CoA dehydrogenase activity [GO:0004466]; very-long-chain fatty acyl-CoA dehydrogenase activity [GO:0017099]	Increase	cluster 5	0	0.961982	1.81111	2.17874							Decrease	cluster 1	0	-1.96765	-2.83429	-3.07705		cluster 1	0	2.92963	4.6454	5.25579
P49756	RBM25	RNA-binding protein 25 (Arg/Glu/Asp-rich protein of 120 kDa) (RED120) (Protein S164) (RNA-binding motif protein 25) (RNA-binding region-containing protein 7)	cytoplasm [GO:0005737]; nuclear speck [GO:0016607]; nucleoplasm [GO:0005654]; spliceosomal complex [GO:0005681]	mRNA processing [GO:0006397]; regulation of alternative mRNA splicing, via spliceosome [GO:0000381]; regulation of apoptotic process [GO:0042981]; RNA splicing [GO:0008380]	mRNA binding [GO:0003729]; RNA binding [GO:0003723]	Increase	cluster 5	0	0.0643802	0.494487	0.89877
P53992	SEC24C	Protein transport protein Sec24C (SEC24-related protein C)	COPII vesicle coat [GO:0030127]; cytosol [GO:0005829]; endoplasmic reticulum exit site [GO:0070971]; endoplasmic reticulum membrane [GO:0005789]; ER to Golgi transport vesicle membrane [GO:0012507]	COPII-coated vesicle cargo loading [GO:0090110]; endoplasmic reticulum to Golgi vesicle-mediated transport [GO:0006888]; in utero embryonic development [GO:0001701]; intracellular protein transport [GO:0006886]	SNARE binding [GO:0000149]; zinc ion binding [GO:0008270]	Increase	cluster 5	0	1.15239	1.70967	2.26022																				cluster 7	0	-3.70658	-4.02299	-4.23109
P54819	AK2	Adenylate kinase 2, mitochondrial (AK 2) (EC 2.7.4.3) (ATP-AMP transphosphorylase 2) (ATP:AMP phosphotransferase) (Adenylate monophosphate kinase) [Cleaved into: Adenylate kinase 2, mitochondrial, N-terminally processed]	cytoplasm [GO:0005737]; extracellular exosome [GO:0070062]; mitochondrial intermembrane space [GO:0005758]; mitochondrion [GO:0005739]; sperm mitochondrial sheath [GO:0097226]	ADP biosynthetic process [GO:0006172]; AMP metabolic process [GO:0046033]; ATP metabolic process [GO:0046034]; nucleobase-containing small molecule interconversion [GO:0015949]; phosphorylation [GO:0016310]	adenylate kinase activity [GO:0004017]; ATP binding [GO:0005524]	Increase	cluster 5	0	0.0561148	0.226864	0.537774																				cluster 3	0	-0.260232	-0.760057	-0.675991
P55809	OXCT1	Succinyl-CoA:3-ketoacid coenzyme A transferase 1, mitochondrial (SCOT) (EC 2.8.3.5) (3-oxoacid CoA-transferase 1) (Somatic-type succinyl-CoA:3-oxoacid CoA-transferase) (SCOT-s) (Succinyl-CoA:3-oxoacid CoA transferase)	mitochondrial matrix [GO:0005759]; mitochondrion [GO:0005739]	cellular ketone body metabolic process [GO:0046950]; ketone body catabolic process [GO:0046952]; ketone catabolic process [GO:0042182]	succinyl-CoA:3-oxo-acid CoA-transferase activity [GO:0008260]	Increase	cluster 5	0	1.73146	2.67825	2.41482
P61758	VBP1	Prefoldin subunit 3 (HIBBJ46) (von Hippel-Lindau-binding protein 1) (VBP-1) (VHL-binding protein 1)	cytoplasm [GO:0005737]; cytosol [GO:0005829]; intracellular membrane-bounded organelle [GO:0043231]; nucleus [GO:0005634]; prefoldin complex [GO:0016272]	chaperone-mediated protein folding [GO:0061077]; microtubule-based process [GO:0007017]; negative regulation of amyloid fibril formation [GO:1905907]; protein folding [GO:0006457]; tubulin complex assembly [GO:0007021]	amyloid-beta binding [GO:0001540]; tubulin binding [GO:0015631]; unfolded protein binding [GO:0051082]	Increase	cluster 5	0	-0.0489798	0.96726	1.14596		cluster 3	0	-1.45477	-1.81255	-1.53446														cluster 3	0	-1.40579	-2.77981	-2.68042
P62424	RPL7A	Large ribosomal subunit protein eL8 (60S ribosomal protein L7a) (PLA-X polypeptide) (Surfeit locus protein 3)	cytoplasm [GO:0005737]; cytosol [GO:0005829]; cytosolic large ribosomal subunit [GO:0022625]; cytosolic ribosome [GO:0022626]; focal adhesion [GO:0005925]; membrane [GO:0016020]; nucleolus [GO:0005730]; nucleus [GO:0005634]; ribosome [GO:0005840]; synapse [GO:0045202]	cytoplasmic translation [GO:0002181]; maturation of LSU-rRNA [GO:0000470]; translation [GO:0006412]	cadherin binding [GO:0045296]; RNA binding [GO:0003723]; structural constituent of ribosome [GO:0003735]	Increase	cluster 5	0	-0.00105528	0.372755	0.656746																				cluster 3	0	-0.759066	-0.844446	-1.00284
P62913	RPL11	Large ribosomal subunit protein uL5 (60S ribosomal protein L11) (CLL-associated antigen KW-12)	cytoplasm [GO:0005737]; cytosol [GO:0005829]; cytosolic large ribosomal subunit [GO:0022625]; cytosolic ribosome [GO:0022626]; extracellular exosome [GO:0070062]; membrane [GO:0016020]; nucleolus [GO:0005730]; nucleoplasm [GO:0005654]; protein-containing complex [GO:0032991]	cytoplasmic translation [GO:0002181]; negative regulation of proteasomal ubiquitin-dependent protein catabolic process [GO:0032435]; negative regulation of protein neddylation [GO:2000435]; negative regulation of ubiquitin protein ligase activity [GO:1904667]; negative regulation of ubiquitin-dependent protein catabolic process [GO:2000059]; positive regulation of gene expression [GO:0010628]; po…	5S rRNA binding [GO:0008097]; RNA binding [GO:0003723]; structural constituent of ribosome [GO:0003735]; ubiquitin ligase inhibitor activity [GO:1990948]; ubiquitin protein ligase binding [GO:0031625]	Increase	cluster 5	0	0.0430401	0.412517	0.222751	Decrease	cluster 7	0	-0.293496	-0.0925712	-0.723316								cluster 2	0	-0.270455	0.415804	-0.0444445	Decrease	cluster 1	0	-0.336536	-0.505088	-0.946067
P62937	PPIA	Peptidyl-prolyl cis-trans isomerase A (PPIase A) (EC 5.2.1.8) (Cyclophilin A) (Cyclosporin A-binding protein) (Rotamase A) [Cleaved into: Peptidyl-prolyl cis-trans isomerase A, N-terminally processed]	cytoplasm [GO:0005737]; cytosol [GO:0005829]; extracellular exosome [GO:0070062]; extracellular region [GO:0005576]; extracellular space [GO:0005615]; ficolin-1-rich granule lumen [GO:1904813]; focal adhesion [GO:0005925]; membrane [GO:0016020]; nucleus [GO:0005634]; protein-containing complex [GO:0032991]; secretory granule lumen [GO:0034774]; vesicle [GO:0031982]	activation of protein kinase B activity [GO:0032148]; apoptotic process [GO:0006915]; cell adhesion molecule production [GO:0060352]; cellular response to oxidative stress [GO:0034599]; endothelial cell activation [GO:0042118]; leukocyte chemotaxis [GO:0030595]; lipid droplet organization [GO:0034389]; negative regulation of oxidative stress-induced intrinsic apoptotic signaling pathway [GO:19021…	cyclosporin A binding [GO:0016018]; heparan sulfate binding [GO:1904399]; integrin binding [GO:0005178]; peptidyl-prolyl cis-trans isomerase activity [GO:0003755]; RNA binding [GO:0003723]; unfolded protein binding [GO:0051082]; virion binding [GO:0046790]	Increase	cluster 5	0	0.155388	0.554987	0.623183													Decrease	cluster 6	0	-0.293604	0.220154	-0.500276		cluster 3	0	-0.960661	-1.45773	-1.8052
P82673	MRPS35	Small ribosomal subunit protein mS35 (28S ribosomal protein S28, mitochondrial) (MRP-S28) (S28mt) (28S ribosomal protein S35, mitochondrial) (MRP-S35) (S35mt)	mitochondrial inner membrane [GO:0005743]; mitochondrial small ribosomal subunit [GO:0005763]	mitochondrial translation [GO:0032543]	RNA binding [GO:0003723]; structural constituent of ribosome [GO:0003735]	Increase	cluster 5	0	0.36074	1.97107	1.37083							Decrease	cluster 1	0	-1.42987	-3.00338	-4.46825	Increase	cluster 3	0	1.79061	4.97445	5.83908
Q15020	SART3	Squamous cell carcinoma antigen recognized by T-cells 3 (SART-3) (Tat-interacting protein of 110 kDa) (Tip110) (p110 nuclear RNA-binding protein)	ASAP complex [GO:0061574]; Cajal body [GO:0015030]; cytoplasm [GO:0005737]; nuclear speck [GO:0016607]; nucleoplasm [GO:0005654]; nucleus [GO:0005634]	cell morphogenesis [GO:0000902]; hematopoietic stem cell proliferation [GO:0071425]; homeostasis of number of cells [GO:0048872]; mRNA splicing, via spliceosome [GO:0000398]; nucleosome assembly [GO:0006334]; regulation of gene expression [GO:0010468]; spliceosomal snRNP assembly [GO:0000387]; spliceosomal tri-snRNP complex assembly [GO:0000244]; transcription elongation-coupled chromatin remodel…	histone binding [GO:0042393]; RNA binding [GO:0003723]; U4 snRNA binding [GO:0030621]; U6 snRNA binding [GO:0017070]; U6atac snRNA binding [GO:0030624]; ubiquitin-specific protease binding [GO:1990381]	Increase	cluster 5	0	0.307749	0.637209	0.519923
Q16891	IMMT	MICOS complex subunit MIC60 (Cell proliferation-inducing gene 4/52 protein) (Mitochondrial inner membrane protein) (Mitofilin) (p87/89)	membrane [GO:0016020]; MIB complex [GO:0140275]; MICOS complex [GO:0061617]; mitochondrial crista junction [GO:0044284]; mitochondrial inner membrane [GO:0005743]; mitochondrial intermembrane space [GO:0005758]; mitochondrion [GO:0005739]; SAM complex [GO:0001401]	cristae formation [GO:0042407]; inner mitochondrial membrane organization [GO:0007007]; mitochondrial calcium ion homeostasis [GO:0051560]; neuron cellular homeostasis [GO:0070050]	RNA binding [GO:0003723]	Increase	cluster 5	0	1.61635	1.82652	1.99875
Q2TAL8	QRICH1	Transcriptional regulator QRICH1 (Glutamine-rich protein 1)	cytoplasm [GO:0005737]; nucleoplasm [GO:0005654]; nucleus [GO:0005634]; plasma membrane [GO:0005886]	endoplasmic reticulum unfolded protein response [GO:0030968]; integrated stress response signaling [GO:0140467]; intrinsic apoptotic signaling pathway in response to endoplasmic reticulum stress [GO:0070059]; PERK-mediated unfolded protein response [GO:0036499]; positive regulation of apoptotic process [GO:0043065]; positive regulation of DNA-templated transcription [GO:0045893]; response to endo…	DNA binding [GO:0003677]	Increase	cluster 5	0	0.616557	1.57899	1.65259
Q7Z589	EMSY	BRCA2-interacting transcriptional repressor EMSY	nucleoplasm [GO:0005654]	chromatin organization [GO:0006325]; DNA repair [GO:0006281]; regulation of DNA-templated transcription [GO:0006355]	identical protein binding [GO:0042802]	Increase	cluster 5	0	0.137283	0.375797	0.845731
Q8N163	CCAR2	Cell cycle and apoptosis regulator protein 2 (Cell division cycle and apoptosis regulator protein 2) (DBIRD complex subunit KIAA1967) (Deleted in breast cancer gene 1 protein) (DBC-1) (DBC.1) (NET35) (p30 DBC)	chromatin [GO:0000785]; cytoplasm [GO:0005737]; DBIRD complex [GO:0044609]; mitochondrial matrix [GO:0005759]; nucleoplasm [GO:0005654]; nucleus [GO:0005634]; spindle [GO:0005819]	cell cycle [GO:0007049]; DNA damage response [GO:0006974]; mitochondrial fragmentation involved in apoptotic process [GO:0043653]; mRNA processing [GO:0006397]; negative regulation of catalytic activity [GO:0043086]; negative regulation of cell growth [GO:0030308]; negative regulation of DNA-templated transcription [GO:0045892]; negative regulation of intrinsic apoptotic signaling pathway in resp…	adenyl-nucleotide exchange factor activity [GO:0000774]; enzyme binding [GO:0019899]; enzyme inhibitor activity [GO:0004857]; RNA binding [GO:0003723]; RNA polymerase II complex binding [GO:0000993]; unfolded protein binding [GO:0051082]	Increase	cluster 5	0	0.0366865	0.797746	0.577914		cluster 2	0	-1.55051	-1.58539	-1.49243							Increase	cluster 3	0	0.0590664	0.391149	2.80311		cluster 3	0	-1.5872	-2.38314	-2.07034
Q8N1F7	NUP93	Nuclear pore complex protein Nup93 (93 kDa nucleoporin) (Nucleoporin Nup93)	centrosome [GO:0005813]; cytosol [GO:0005829]; membrane [GO:0016020]; nuclear envelope [GO:0005635]; nuclear membrane [GO:0031965]; nuclear periphery [GO:0034399]; nuclear pore [GO:0005643]	nuclear envelope organization [GO:0006998]; nuclear pore complex assembly [GO:0051292]; nucleocytoplasmic transport [GO:0006913]; poly(A)+ mRNA export from nucleus [GO:0016973]; positive regulation of SMAD protein signal transduction [GO:0060391]; protein import into nucleus [GO:0006606]	structural constituent of nuclear pore [GO:0017056]	Increase	cluster 5	0	0.262187	0.926249	0.87491																				cluster 3	0	-1.63937	-2.75644	-2.43894
Q8NF91	SYNE1	Nesprin-1 (Enaptin) (KASH domain-containing protein 1) (KASH1) (Myocyte nuclear envelope protein 1) (Myne-1) (Nuclear envelope spectrin repeat protein 1) (Synaptic nuclear envelope protein 1) (Syne-1)	cytoplasm [GO:0005737]; cytoskeleton [GO:0005856]; dendritic spine head [GO:0044327]; Golgi apparatus [GO:0005794]; meiotic nuclear membrane microtubule tethering complex [GO:0034993]; membrane [GO:0016020]; midbody [GO:0030496]; nuclear envelope [GO:0005635]; nuclear membrane [GO:0031965]; nuclear outer membrane [GO:0005640]; nucleolus [GO:0005730]; nucleoplasm [GO:0005654]; nucleus [GO:0005634]…	cardiac muscle cell differentiation [GO:0055007]; cytoskeleton organization [GO:0007010]; Golgi organization [GO:0007030]; muscle cell differentiation [GO:0042692]; negative regulation of mesenchymal cell apoptotic process [GO:2001054]; negative regulation of mini excitatory postsynaptic potential [GO:0061886]; nuclear matrix anchoring at nuclear membrane [GO:0090292]; nuclear migration [GO:00070…	actin binding [GO:0003779]; actin filament binding [GO:0051015]; cytoskeleton-nuclear membrane anchor activity [GO:0140444]; enzyme binding [GO:0019899]; identical protein binding [GO:0042802]; kinesin binding [GO:0019894]; lamin binding [GO:0005521]; protein homodimerization activity [GO:0042803]; RNA binding [GO:0003723]; signaling receptor binding [GO:0005102]	Increase	cluster 5	0	2.52941	3.32788	3.78239
Q92543	SNX19	Sorting nexin-19	cytoplasm [GO:0005737]; early endosome membrane [GO:0031901]; intracellular membrane-bounded organelle [GO:0043231]	chondrocyte differentiation [GO:0002062]; dense core granule maturation [GO:1990502]; establishment of localization in cell [GO:0051649]; exocytosis [GO:0006887]; insulin secretion [GO:0030073]	phosphatidylinositol binding [GO:0035091]	Increase	cluster 5	0	1.23318	1.57746	1.92663														cluster 2	0	-0.491048	1.41583	0.679212		cluster 2	0	-1.53557	-1.85346	-1.38384
Q92917	GPKOW	G-patch domain and KOW motifs-containing protein (G-patch domain-containing protein 5) (Protein MOS2 homolog) (Protein T54)	nucleoplasm [GO:0005654]; nucleus [GO:0005634]; spliceosomal complex [GO:0005681]	mRNA splicing, via spliceosome [GO:0000398]	RNA binding [GO:0003723]	Increase	cluster 5	0	0.105655	0.464718	0.557829
Q969J3	BORCS5	BLOC-1-related complex subunit 5 (Loss of heterozygosity 12 chromosomal region 1) (Myristoylated lysosomal protein) (Myrlysin)	BORC complex [GO:0099078]; cytoplasmic side of lysosomal membrane [GO:0098574]; intracellular membrane-bounded organelle [GO:0043231]; membrane [GO:0016020]; plasma membrane [GO:0005886]; synaptic vesicle membrane [GO:0030672]	lysosome localization [GO:0032418]; organelle transport along microtubule [GO:0072384]; positive regulation of anterograde synaptic vesicle transport [GO:1903744]; regulation of endosome size [GO:0051036]; regulation of lysosome size [GO:0062196]		Increase	cluster 5	0	0.172029	0.727172	0.492501		cluster 4	0	-3.79494	-3.95756	-2.5622														cluster 3	0	-3.96697	-4.68473	-3.0547
Q96M27	PRRC1	Protein PRRC1 (Proline-rich and coiled-coil-containing protein 1)	cytoplasm [GO:0005737]; Golgi apparatus [GO:0005794]		protein kinase A regulatory subunit binding [GO:0034237]	Increase	cluster 5	0	0.251695	0.287168	0.528957		cluster 4	0	-1.01895	-2.12206	-1.15412														cluster 3	0	-1.27065	-2.40923	-1.68307
Q99848	EBNA1BP2	Probable rRNA-processing protein EBP2 (EBNA1-binding protein 2) (Nucleolar protein p40)	chromosome [GO:0005694]; nuclear periphery [GO:0034399]; nucleolus [GO:0005730]; preribosome, large subunit precursor [GO:0030687]	ribosomal large subunit biogenesis [GO:0042273]; rRNA processing [GO:0006364]	RNA binding [GO:0003723]	Increase	cluster 5	0	0.754079	1.23124	1.82118
Q9H078	CLPB	Mitochondrial disaggregase (EC 3.6.1.-) (Suppressor of potassium transport defect 3) [Cleaved into: Mitochondrial disaggregase, cleaved form]	cytoplasm [GO:0005737]; mitochondrial intermembrane space [GO:0005758]; mitochondrion [GO:0005739]	antiviral innate immune response [GO:0140374]; cellular response to heat [GO:0034605]; granulocyte differentiation [GO:0030851]; RIG-I signaling pathway [GO:0039529]	ATP binding [GO:0005524]; ATP hydrolysis activity [GO:0016887]; ATP-dependent protein disaggregase activity [GO:0140545]	Increase	cluster 5	0	0.640931	1.21197	1.21104
Q9H3P2	NELFA	Negative elongation factor A (NELF-A) (Wolf-Hirschhorn syndrome candidate 2 protein)	cytosol [GO:0005829]; NELF complex [GO:0032021]; nuclear body [GO:0016604]; nucleoplasm [GO:0005654]; nucleus [GO:0005634]	negative regulation of transcription elongation by RNA polymerase II [GO:0034244]; positive regulation of protein modification process [GO:0031401]; positive regulation of transcription by RNA polymerase II [GO:0045944]	chromatin binding [GO:0003682]; molecular adaptor activity [GO:0060090]	Increase	cluster 5	0	0.166646	0.336687	0.605698
Q9UNM6	PSMD13	26S proteasome non-ATPase regulatory subunit 13 (26S proteasome regulatory subunit RPN9) (26S proteasome regulatory subunit S11) (26S proteasome regulatory subunit p40.5)	cytosol [GO:0005829]; extracellular region [GO:0005576]; ficolin-1-rich granule lumen [GO:1904813]; membrane [GO:0016020]; nucleoplasm [GO:0005654]; nucleus [GO:0005634]; proteasome accessory complex [GO:0022624]; proteasome complex [GO:0000502]; proteasome regulatory particle [GO:0005838]; proteasome regulatory particle, lid subcomplex [GO:0008541]; secretory granule lumen [GO:0034774]	meiosis I [GO:0007127]; proteasome-mediated ubiquitin-dependent protein catabolic process [GO:0043161]; ubiquitin-dependent protein catabolic process [GO:0006511]	structural molecule activity [GO:0005198]	Increase	cluster 5	0	0.197975	1.10259	0.954497																				cluster 3	0	-1.14789	-2.2629	-1.48305
Q9UQL6	HDAC5	Histone deacetylase 5 (HD5) (EC 3.5.1.98) (Antigen NY-CO-9)	cytoplasm [GO:0005737]; cytosol [GO:0005829]; Golgi apparatus [GO:0005794]; histone deacetylase complex [GO:0000118]; nuclear speck [GO:0016607]; nucleoplasm [GO:0005654]; nucleus [GO:0005634]	B cell activation [GO:0042113]; B cell differentiation [GO:0030183]; cellular response to insulin stimulus [GO:0032869]; cellular response to lipopolysaccharide [GO:0071222]; inflammatory response [GO:0006954]; negative regulation of cell migration involved in sprouting angiogenesis [GO:0090051]; negative regulation of DNA-templated transcription [GO:0045892]; negative regulation of gene expressi…	chromatin binding [GO:0003682]; DNA-binding transcription factor binding [GO:0140297]; histone deacetylase activity [GO:0004407]; histone deacetylase binding [GO:0042826]; identical protein binding [GO:0042802]; metal ion binding [GO:0046872]; protein kinase C binding [GO:0005080]; protein lysine deacetylase activity [GO:0033558]; RNA polymerase II cis-regulatory region sequence-specific DNA bind…	Increase	cluster 5	0	1.56222	2.35996	3.1836
Q9Y6N6	LAMC3	Laminin subunit gamma-3 (Laminin-12 subunit gamma) (Laminin-14 subunit gamma) (Laminin-15 subunit gamma)	basement membrane [GO:0005604]; extracellular matrix [GO:0031012]; extracellular region [GO:0005576]; membrane [GO:0016020]	animal organ morphogenesis [GO:0009887]; astrocyte development [GO:0014002]; cell morphogenesis [GO:0000902]; retina development in camera-type eye [GO:0060041]; substrate adhesion-dependent cell spreading [GO:0034446]; tissue development [GO:0009888]; visual perception [GO:0007601]	structural molecule activity [GO:0005198]	Increase	cluster 5	0	0.0264348	0.795104	1.01699																			Decrease	cluster 1	0	0.213077	-1.39795	-1.27704
A0MZ66	SHTN1	Shootin-1 (Shootin1)	axon [GO:0030424]; axonal growth cone [GO:0044295]; cell leading edge [GO:0031252]; cytoplasm [GO:0005737]; filopodium [GO:0030175]; growth cone [GO:0030426]; lamellipodium [GO:0030027]; microtubule [GO:0005874]; microtubule associated complex [GO:0005875]; microtubule cytoskeleton [GO:0015630]; perikaryon [GO:0043204]; perinuclear region of cytoplasm [GO:0048471]	actin filament bundle retrograde transport [GO:0061573]; axonogenesis [GO:0007409]; Cdc42 protein signal transduction [GO:0032488]; cytoplasmic actin-based contraction involved in cell motility [GO:0060327]; endoplasmic reticulum polarization [GO:0061163]; netrin-activated signaling pathway [GO:0038007]; neuron projection morphogenesis [GO:0048812]; positive regulation of axon extension [GO:00457…	actin filament binding [GO:0051015]; cadherin binding [GO:0045296]; identical protein binding [GO:0042802]; kinesin binding [GO:0019894]	Recovered	cluster 2	0	-1.0903	-0.630465	-0.376282		cluster 2	0	-1.8222	-1.68733	-1.49216	Recovered	cluster 12	0	-0.70699	-0.472236	0.149589	Decrease	cluster 6	0	-0.383307	-0.158229	-0.525871		cluster 3	0	-0.731899	-1.05687	-1.11587
B7ZAP0	RABGAP1L	Rab GTPase-activating protein 1-like, isoform 10				Recovered	cluster 2	0	-1.40774	-0.717389	-0.604667		cluster 2	0	-2.5098	-2.19928	-1.83284														cluster 3	0	-1.10206	-1.48189	-1.22817
O00151	PDLIM1	PDZ and LIM domain protein 1 (C-terminal LIM domain protein 1) (Elfin) (LIM domain protein CLP-36)	adherens junction [GO:0005912]; cytoplasm [GO:0005737]; cytoskeleton [GO:0005856]; filamentous actin [GO:0031941]; focal adhesion [GO:0005925]; stress fiber [GO:0001725]; transcription regulator complex [GO:0005667]; Z disc [GO:0030018]	actin cytoskeleton organization [GO:0030036]; establishment or maintenance of actin cytoskeleton polarity [GO:0030950]; fibroblast migration [GO:0010761]; heart development [GO:0007507]; maintenance of cell polarity [GO:0030011]; muscle structure development [GO:0061061]; regulation of transcription by RNA polymerase II [GO:0006357]; response to hypoxia [GO:0001666]; response to oxidative stress …	actin binding [GO:0003779]; cadherin binding involved in cell-cell adhesion [GO:0098641]; metal ion binding [GO:0046872]; muscle alpha-actinin binding [GO:0051371]; transcription coactivator activity [GO:0003713]	Recovered	cluster 2	0	-1.35936	-0.479373	-0.384657		cluster 3	0	-1.59173	-2.02024	-1.5388													Decrease	cluster 1	0	-0.232373	-1.54086	-1.15415
O00203	AP3B1	AP-3 complex subunit beta-1 (Adaptor protein complex AP-3 subunit beta-1) (Adaptor-related protein complex 3 subunit beta-1) (Beta-3A-adaptin) (Clathrin assembly protein complex 3 beta-1 large chain)	AP-3 adaptor complex [GO:0030123]; axon cytoplasm [GO:1904115]; clathrin adaptor complex [GO:0030131]; clathrin-coated vesicle membrane [GO:0030665]; early endosome [GO:0005769]; Golgi apparatus [GO:0005794]; lysosomal membrane [GO:0005765]; membrane [GO:0016020]; microvesicle [GO:1990742]; mitochondrion [GO:0005739]	anterograde axonal transport [GO:0008089]; anterograde synaptic vesicle transport [GO:0048490]; antigen processing and presentation, exogenous lipid antigen via MHC class Ib [GO:0048007]; blood coagulation [GO:0007596]; cell morphogenesis [GO:0000902]; clathrin-coated vesicle cargo loading, AP-3-mediated [GO:0035654]; establishment of protein localization to mitochondrial membrane involved in mit…	GTP-dependent protein binding [GO:0030742]; protein phosphatase binding [GO:0019903]	Recovered	cluster 2	0	-0.677794	-0.290655	-0.20107		cluster 2	0	-1.34598	-1.26307	-1.29552	Decrease	cluster 1	0	-0.866204	-1.36741	-1.42115	Increase	cluster 3	0	0.18841	1.07675	1.22008		cluster 3	0	-0.66819	-0.972414	-1.09445
O00299	CLIC1	Chloride intracellular channel protein 1 (Chloride channel ABP) (Nuclear chloride ion channel 27) (NCC27) (Regulatory nuclear chloride ion channel protein) (hRNCC)	blood microparticle [GO:0072562]; brush border [GO:0005903]; chloride channel complex [GO:0034707]; cytoplasm [GO:0005737]; endoplasmic reticulum [GO:0005783]; extracellular exosome [GO:0070062]; extracellular space [GO:0005615]; membrane [GO:0016020]; mitochondrion [GO:0005739]; nuclear envelope [GO:0005635]; nuclear membrane [GO:0031965]; nucleus [GO:0005634]; perinuclear region of cytoplasm [G…	chloride transport [GO:0006821]; platelet aggregation [GO:0070527]; positive regulation of osteoblast differentiation [GO:0045669]; regulation of mitochondrial membrane potential [GO:0051881]; signal transduction [GO:0007165]	cadherin binding [GO:0045296]; chloride channel activity [GO:0005254]	Recovered	cluster 2	0	-1.22793	-0.774731	-0.251185																				cluster 5	0	-0.396792	-2.12249	-0.529845
O00401	WASL	Actin nucleation-promoting factor WASL (Neural Wiskott-Aldrich syndrome protein) (N-WASP)	actin cap [GO:0030478]; actin cytoskeleton [GO:0015629]; cytoplasm [GO:0005737]; cytoplasmic vesicle [GO:0031410]; cytosol [GO:0005829]; endocytic vesicle membrane [GO:0030666]; endoplasmic reticulum membrane [GO:0005789]; extracellular exosome [GO:0070062]; glutamatergic synapse [GO:0098978]; lamellipodium [GO:0030027]; nucleus [GO:0005634]; plasma membrane [GO:0005886]	actin filament polymerization [GO:0030041]; actin polymerization or depolymerization [GO:0008154]; cell division [GO:0051301]; dendritic spine morphogenesis [GO:0060997]; negative regulation of lymphocyte migration [GO:2000402]; negative regulation of membrane tubulation [GO:1903526]; positive regulation of clathrin-dependent endocytosis [GO:2000370]; positive regulation of filopodium assembly [G…	actin binding [GO:0003779]; GTPase regulator activity [GO:0030695]; microtubule binding [GO:0008017]	Recovered	cluster 2	0	-0.891962	-0.362989	-0.172138		cluster 4	0	-1.547	-1.76768	-1.29491		cluster 9	0	-0.0674146	-0.179626	0.316176		cluster 4	0	-0.824548	-0.183363	-0.488314		cluster 3	0	-0.655039	-1.40469	-1.12277
O00443	PIK3C2A	Phosphatidylinositol 4-phosphate 3-kinase C2 domain-containing subunit alpha (PI3K-C2-alpha) (PtdIns-3-kinase C2 subunit alpha) (EC 2.7.1.137) (EC 2.7.1.153) (EC 2.7.1.154) (Phosphoinositide 3-kinase-C2-alpha)	clathrin-coated vesicle [GO:0030136]; cytoplasm [GO:0005737]; cytosol [GO:0005829]; extracellular exosome [GO:0070062]; intracellular membrane-bounded organelle [GO:0043231]; membrane [GO:0016020]; nucleoplasm [GO:0005654]; phosphatidylinositol 3-kinase complex [GO:0005942]; plasma membrane [GO:0005886]; trans-Golgi network [GO:0005802]; vesicle [GO:0031982]	cell migration [GO:0016477]; clathrin coat assembly [GO:0048268]; endocytosis [GO:0006897]; epidermal growth factor receptor signaling pathway [GO:0007173]; exocytosis [GO:0006887]; insulin receptor signaling pathway [GO:0008286]; membrane organization [GO:0061024]; phosphatidylinositol biosynthetic process [GO:0006661]; phosphatidylinositol-3-phosphate biosynthetic process [GO:0036092]; phosphat…	1-phosphatidylinositol-3-kinase activity [GO:0016303]; 1-phosphatidylinositol-4,5-bisphosphate 3-kinase activity [GO:0046934]; 1-phosphatidylinositol-4-phosphate 3-kinase activity [GO:0035005]; ATP binding [GO:0005524]; clathrin binding [GO:0030276]; phosphatidylinositol binding [GO:0035091]	Recovered	cluster 2	0	-0.816162	-0.493368	-0.405282		cluster 4	0	-2.39221	-2.93025	-2.11766														cluster 3	0	-1.57605	-2.43688	-1.71237
O00463	TRAF5	TNF receptor-associated factor 5 (RING finger protein 84)	CD40 receptor complex [GO:0035631]; centrosome [GO:0005813]; cytoplasm [GO:0005737]; cytoplasmic side of plasma membrane [GO:0009898]; cytosol [GO:0005829]	apoptotic process [GO:0006915]; interleukin-17-mediated signaling pathway [GO:0097400]; mRNA stabilization [GO:0048255]; positive regulation of canonical NF-kappaB signal transduction [GO:0043123]; positive regulation of cell population proliferation [GO:0008284]; positive regulation of DNA-binding transcription factor activity [GO:0051091]; positive regulation of NF-kappaB transcription factor a…	identical protein binding [GO:0042802]; thioesterase binding [GO:0031996]; tumor necrosis factor receptor binding [GO:0005164]; ubiquitin protein ligase binding [GO:0031625]; zinc ion binding [GO:0008270]	Recovered	cluster 2	0	-1.26116	-0.104578	0.425946																			Decrease	cluster 1	0	-0.484795	-2.0167	-2.45719
O14530	TXNDC9	Thioredoxin domain-containing protein 9 (ATP-binding protein associated with cell differentiation) (Protein 1-4)	centrosome [GO:0005813]; cytoplasm [GO:0005737]; cytosol [GO:0005829]; midbody [GO:0030496]; nucleus [GO:0005634]	microtubule cytoskeleton organization [GO:0000226]	cadherin binding [GO:0045296]	Recovered	cluster 2	0	-2.15584	-1.4173	-1.06785
O14641	DVL2	Segment polarity protein dishevelled homolog DVL-2 (Dishevelled-2) (DSH homolog 2)	aggresome [GO:0016235]; apical part of cell [GO:0045177]; clathrin-coated endocytic vesicle [GO:0045334]; cytoplasm [GO:0005737]; cytoplasmic vesicle [GO:0031410]; cytosol [GO:0005829]; lateral plasma membrane [GO:0016328]; nuclear body [GO:0016604]; nucleoplasm [GO:0005654]; nucleus [GO:0005634]	canonical Wnt signaling pathway [GO:0060070]; cochlea morphogenesis [GO:0090103]; convergent extension involved in neural plate elongation [GO:0022007]; heart development [GO:0007507]; heart looping [GO:0001947]; intracellular signal transduction [GO:0035556]; neural tube closure [GO:0001843]; non-canonical Wnt signaling pathway [GO:0035567]; outflow tract morphogenesis [GO:0003151]; planar cell …	frizzled binding [GO:0005109]; identical protein binding [GO:0042802]; protein domain specific binding [GO:0019904]; protein kinase binding [GO:0019901]; protein self-association [GO:0043621]; protein-macromolecule adaptor activity [GO:0030674]; small GTPase binding [GO:0031267]	Recovered	cluster 2	0	-0.832978	-0.567875	-0.317849		cluster 3	0	-2.18462	-2.86835	-2.21175		cluster 11	0	0.242753	-0.593819	-0.900547		cluster 7	0	-1.07573	0.0259436	0.582699		cluster 3	0	-1.35165	-2.30048	-1.8939
O14737	PDCD5	Programmed cell death protein 5 (TF-1 cell apoptosis-related protein 19) (Protein TFAR19)	cytoplasm [GO:0005737]; cytosol [GO:0005829]; extracellular exosome [GO:0070062]; nucleus [GO:0005634]	apoptotic process [GO:0006915]; cellular response to transforming growth factor beta stimulus [GO:0071560]; negative regulation of cell population proliferation [GO:0008285]; negative regulation of chaperone-mediated protein folding [GO:1903645]; positive regulation of apoptotic process [GO:0043065]; positive regulation of cysteine-type endopeptidase activity involved in apoptotic process [GO:004…	acetyltransferase activator activity [GO:0010698]; beta-tubulin binding [GO:0048487]; DNA binding [GO:0003677]; heparin binding [GO:0008201]	Recovered	cluster 2	0	-0.783363	-0.239684	-0.19604		cluster 3	0	-1.30917	-1.66277	-1.52988							Decrease	cluster 6	0	-0.571285	-0.0420816	-0.737822		cluster 3	0	-0.525807	-1.42309	-1.33384
O14810	CPLX1	Complexin-1 (Complexin I) (CPX I) (Synaphin-2)	calyx of Held [GO:0044305]; cytosol [GO:0005829]; glutamatergic synapse [GO:0098978]; perikaryon [GO:0043204]; postsynapse [GO:0098794]; Schaffer collateral - CA1 synapse [GO:0098685]; SNARE complex [GO:0031201]; synaptobrevin 2-SNAP-25-syntaxin-3-complexin complex [GO:0070554]; terminal bouton [GO:0043195]	chemical synaptic transmission [GO:0007268]; exocytosis [GO:0006887]; insulin secretion [GO:0030073]; regulation of exocytic insertion of neurotransmitter receptor to postsynaptic membrane [GO:0099145]; regulation of exocytosis [GO:0017157]; regulation of neurotransmitter secretion [GO:0046928]; regulation of synaptic vesicle fusion to presynaptic active zone membrane [GO:0031630]; synaptic vesic…	neurotransmitter transmembrane transporter activity [GO:0005326]; SNARE binding [GO:0000149]; syntaxin binding [GO:0019905]	Recovered	cluster 2	0	-2.52277	-1.59766	-1.24675
O14950	MYL12B	Myosin regulatory light chain 12B (MLC-2A) (MLC-2) (Myosin regulatory light chain 2-B, smooth muscle isoform) (Myosin regulatory light chain 20 kDa) (MLC20) (Myosin regulatory light chain MRLC2) (SHUJUN-1)	apical part of cell [GO:0045177]; brush border [GO:0005903]; cell cortex [GO:0005938]; cytoplasm [GO:0005737]; cytosol [GO:0005829]; extracellular exosome [GO:0070062]; myofibril [GO:0030016]; myosin II complex [GO:0016460]; stress fiber [GO:0001725]; Z disc [GO:0030018]	platelet aggregation [GO:0070527]; regulation of cell shape [GO:0008360]	calcium ion binding [GO:0005509]; myosin heavy chain binding [GO:0032036]	Recovered	cluster 2	0	-1.50653	-0.872382	-0.493535		cluster 2	0	-2.21805	-2.05008	-1.72007														cluster 3	0	-0.711525	-1.1777	-1.22654
O14964	HGS	Hepatocyte growth factor-regulated tyrosine kinase substrate (Hrs) (Protein pp110)	cytosol [GO:0005829]; early endosome [GO:0005769]; early endosome membrane [GO:0031901]; endosome [GO:0005768]; ESCRT-0 complex [GO:0033565]; extracellular exosome [GO:0070062]; lysosome [GO:0005764]; multivesicular body membrane [GO:0032585]; phagocytic vesicle lumen [GO:0097013]	endocytic recycling [GO:0032456]; endosomal transport [GO:0016197]; macroautophagy [GO:0016236]; membrane fission [GO:0090148]; membrane invagination [GO:0010324]; multivesicular body assembly [GO:0036258]; negative regulation of angiogenesis [GO:0016525]; negative regulation of cell population proliferation [GO:0008285]; negative regulation of platelet-derived growth factor receptor signaling pa…	metal ion binding [GO:0046872]; phosphatidylinositol binding [GO:0035091]; protein domain specific binding [GO:0019904]; ubiquitin binding [GO:0043130]; ubiquitin-like protein ligase binding [GO:0044389]	Recovered	cluster 2	0	-0.768243	-0.189634	-0.0731471		cluster 2	0	-1.49403	-1.61236	-1.35987														cluster 3	0	-0.725783	-1.42273	-1.28672
O15013	ARHGEF10	Rho guanine nucleotide exchange factor 10	centrosome [GO:0005813]; cytosol [GO:0005829]	actin cytoskeleton organization [GO:0030036]; activation of GTPase activity [GO:0090630]; centrosome duplication [GO:0051298]; mitotic spindle assembly [GO:0090307]; myelination in peripheral nervous system [GO:0022011]; positive regulation of stress fiber assembly [GO:0051496]; regulation of small GTPase mediated signal transduction [GO:0051056]	guanyl-nucleotide exchange factor activity [GO:0005085]; kinesin binding [GO:0019894]	Recovered	cluster 2	0	-2.04188	-0.552621	-0.0650607		cluster 2	0	-1.06793	-1.13747	-1.19102													Decrease	cluster 1	0	0.973952	-0.58485	-1.12596
O15042	U2SURP	U2 snRNP-associated SURP motif-containing protein (140 kDa Ser/Arg-rich domain protein) (U2-associated protein SR140)	nucleoplasm [GO:0005654]; nucleus [GO:0005634]	RNA processing [GO:0006396]	RNA binding [GO:0003723]	Recovered	cluster 2	0	-0.757376	-0.105413	-0.0460203
O15056	SYNJ2	Synaptojanin-2 (EC 3.1.3.36) (Synaptic inositol 1,4,5-trisphosphate 5-phosphatase 2)	cell projection [GO:0042995]; cytoskeleton [GO:0005856]; cytosol [GO:0005829]; membrane raft [GO:0045121]; perinuclear region of cytoplasm [GO:0048471]; plasma membrane [GO:0005886]; presynapse [GO:0098793]	membrane organization [GO:0061024]; phosphatidylinositol biosynthetic process [GO:0006661]; phosphatidylinositol dephosphorylation [GO:0046856]; synaptic vesicle endocytosis [GO:0048488]	phosphatidylinositol phosphate 4-phosphatase activity [GO:0034596]; phosphatidylinositol-3,5-bisphosphate 3-phosphatase activity [GO:0052629]; phosphatidylinositol-3,5-bisphosphate 5-phosphatase activity [GO:0043813]; phosphatidylinositol-3-phosphate phosphatase activity [GO:0004438]; phosphatidylinositol-4,5-bisphosphate 5-phosphatase activity [GO:0004439]; RNA binding [GO:0003723]; SH3 domain b…	Recovered	cluster 2	0	-0.775178	-0.428782	-0.304317		cluster 2	0	-1.45399	-1.0695	-1.48307							Decrease	cluster 6	0	-1.74935	-1.15319	-2.25699	Decrease	cluster 1	0	-0.678809	-0.640721	-1.17875
O15144	ARPC2	Actin-related protein 2/3 complex subunit 2 (Arp2/3 complex 34 kDa subunit) (p34-ARC)	actin cytoskeleton [GO:0015629]; Arp2/3 protein complex [GO:0005885]; cytosol [GO:0005829]; endosome [GO:0005768]; extracellular exosome [GO:0070062]; focal adhesion [GO:0005925]; glutamatergic synapse [GO:0098978]; lamellipodium [GO:0030027]; muscle cell projection membrane [GO:0036195]; neuron projection [GO:0043005]; nucleoplasm [GO:0005654]; nucleus [GO:0005634]; site of double-strand break […	actin filament polymerization [GO:0030041]; actin polymerization-dependent cell motility [GO:0070358]; Arp2/3 complex-mediated actin nucleation [GO:0034314]; positive regulation of actin filament polymerization [GO:0030838]; positive regulation of lamellipodium assembly [GO:0010592]; positive regulation of substrate adhesion-dependent cell spreading [GO:1900026]	actin filament binding [GO:0051015]; structural constituent of cytoskeleton [GO:0005200]	Recovered	cluster 2	0	-1.61831	-1.29859	-0.721447																				cluster 5	0	-0.0227783	-0.366558	-0.109821
O15173	PGRMC2	Membrane-associated progesterone receptor component 2 (Progesterone membrane-binding protein) (Steroid receptor protein DG6)	endomembrane system [GO:0012505]; endoplasmic reticulum [GO:0005783]; extracellular region [GO:0005576]; membrane [GO:0016020]; nuclear envelope [GO:0005635]; nucleoplasm [GO:0005654]	adipose tissue development [GO:0060612]	heme binding [GO:0020037]; heme transmembrane transporter activity [GO:0015232]; nuclear steroid receptor activity [GO:0003707]; steroid binding [GO:0005496]	Recovered	cluster 2	0	-1.18665	-0.307327	-0.321962																			Decrease	cluster 1	0	-0.213554	-0.91615	-2.30788
O15355	PPM1G	Protein phosphatase 1G (EC 3.1.3.16) (Protein phosphatase 1C) (Protein phosphatase 2C isoform gamma) (PP2C-gamma) (Protein phosphatase magnesium-dependent 1 gamma)	cytoplasm [GO:0005737]; membrane [GO:0016020]; nucleoplasm [GO:0005654]; nucleus [GO:0005634]	peptidyl-threonine dephosphorylation [GO:0035970]; protein dephosphorylation [GO:0006470]; regulation of cell cycle [GO:0051726]	metal ion binding [GO:0046872]; myosin phosphatase activity [GO:0017018]; protein serine/threonine phosphatase activity [GO:0004722]	Recovered	cluster 2	0	-1.46186	-0.358732	-0.14522
O15397	IPO8	Importin-8 (Imp8) (Ran-binding protein 8) (RanBP8)	cytosol [GO:0005829]; nuclear envelope [GO:0005635]; nucleoplasm [GO:0005654]	protein import into nucleus [GO:0006606]; signal transduction [GO:0007165]	small GTPase binding [GO:0031267]	Recovered	cluster 2	0	-1.35002	-0.164562	-0.0152654																			Decrease	cluster 1	0	-0.0649551	-1.47499	-1.3328
O15511	ARPC5	Actin-related protein 2/3 complex subunit 5 (Arp2/3 complex 16 kDa subunit) (p16-ARC)	actin cytoskeleton [GO:0015629]; Arp2/3 protein complex [GO:0005885]; cytoplasm [GO:0005737]; cytosol [GO:0005829]; extracellular exosome [GO:0070062]; extracellular region [GO:0005576]; ficolin-1-rich granule lumen [GO:1904813]; focal adhesion [GO:0005925]; lamellipodium [GO:0030027]; nucleus [GO:0005634]; secretory granule lumen [GO:0034774]; site of double-strand break [GO:0035861]	actin cytoskeleton organization [GO:0030036]; Arp2/3 complex-mediated actin nucleation [GO:0034314]; cell migration [GO:0016477]; regulation of actin filament polymerization [GO:0030833]	actin filament binding [GO:0051015]; structural constituent of cytoskeleton [GO:0005200]	Recovered	cluster 2	0	-1.68452	-0.435772	-0.566542		cluster 2	0	-1.69131	-1.48343	-1.40689													Decrease	cluster 1	0	-0.00679272	-1.04765	-0.84035
O43169	CYB5B	Cytochrome b5 type B (Cytochrome b5 outer mitochondrial membrane isoform)	endoplasmic reticulum membrane [GO:0005789]; intracellular membrane-bounded organelle [GO:0043231]; membrane [GO:0016020]; mitochondrial outer membrane [GO:0005741]; nitric-oxide synthase complex [GO:1903958]	nitric oxide biosynthetic process [GO:0006809]; response to oxidative stress [GO:0006979]; xenobiotic metabolic process [GO:0006805]	enzyme activator activity [GO:0008047]; heme binding [GO:0020037]; metal ion binding [GO:0046872]	Recovered	cluster 2	0	-1.24493	-0.532063	-0.104871
O43353	RIPK2	Receptor-interacting serine/threonine-protein kinase 2 (EC 2.7.11.1) (CARD-containing interleukin-1 beta-converting enzyme-associated kinase) (CARD-containing IL-1 beta ICE-kinase) (RIP-like-interacting CLARP kinase) (Receptor-interacting protein 2) (RIP-2) (Tyrosine-protein kinase RIPK2) (EC 2.7.10.2)	cytoplasm [GO:0005737]; cytoskeleton [GO:0005856]; cytosol [GO:0005829]; endoplasmic reticulum [GO:0005783]; plasma membrane [GO:0005886]; protein-containing complex [GO:0032991]; vesicle [GO:0031982]	activation of cysteine-type endopeptidase activity [GO:0097202]; adaptive immune response [GO:0002250]; apoptotic process [GO:0006915]; canonical NF-kappaB signal transduction [GO:0007249]; CD4-positive, alpha-beta T cell proliferation [GO:0035739]; cellular response to lipoteichoic acid [GO:0071223]; cellular response to muramyl dipeptide [GO:0071225]; cellular response to peptidoglycan [GO:0071…	ATP binding [GO:0005524]; CARD domain binding [GO:0050700]; caspase binding [GO:0089720]; identical protein binding [GO:0042802]; JUN kinase kinase kinase activity [GO:0004706]; LIM domain binding [GO:0030274]; non-membrane spanning protein tyrosine kinase activity [GO:0004715]; protein homodimerization activity [GO:0042803]; protein serine kinase activity [GO:0106310]; protein serine/threonine k…	Recovered	cluster 2	0	-1.8961	-0.597935	-0.866922
O43395	PRPF3	U4/U6 small nuclear ribonucleoprotein Prp3 (Pre-mRNA-splicing factor 3) (hPrp3) (U4/U6 snRNP 90 kDa protein)	Cajal body [GO:0015030]; cytosol [GO:0005829]; nuclear speck [GO:0016607]; nucleoplasm [GO:0005654]; nucleus [GO:0005634]; spliceosomal complex [GO:0005681]; U2-type precatalytic spliceosome [GO:0071005]; U4/U6 x U5 tri-snRNP complex [GO:0046540]	mRNA processing [GO:0006397]; mRNA splicing, via spliceosome [GO:0000398]; RNA splicing [GO:0008380]; RNA splicing, via transesterification reactions [GO:0000375]; spliceosomal tri-snRNP complex assembly [GO:0000244]	identical protein binding [GO:0042802]; RNA binding [GO:0003723]	Recovered	cluster 2	0	-0.624908	-0.146368	-0.0498589		cluster 3	0	-1.75961	-1.8113	-2.22534	Decrease	cluster 1	0	-0.795307	-1.17117	-1.3179	Increase	cluster 3	0	0.170399	1.0248	1.26804	Decrease	cluster 1	0	-1.1347	-1.66493	-2.17548
O43399	TPD52L2	Tumor protein D54 (hD54) (Tumor protein D52-like 2)	cytoplasm [GO:0005737]; perinuclear region of cytoplasm [GO:0048471]	carbohydrate metabolic process [GO:0005975]; regulation of cell population proliferation [GO:0042127]	protein homodimerization activity [GO:0042803]; RNA binding [GO:0003723]	Recovered	cluster 2	0	-0.752518	-0.250821	0.0874924		cluster 8	0	-1.18105	-2.55275	-0.525402		cluster 5	0	0.233365	-0.963202	1.11227		cluster 2	0	-0.985883	0.712382	-1.02477		cluster 5	0	-0.428527	-2.30193	-0.612894
O43491	EPB41L2	Band 4.1-like protein 2 (Erythrocyte membrane protein band 4.1-like 2) (Generally expressed protein 4.1) (4.1G)	cell cortex [GO:0005938]; cell junction [GO:0030054]; cytoskeleton [GO:0005856]; cytosol [GO:0005829]; extracellular exosome [GO:0070062]; focal adhesion [GO:0005925]; nucleoplasm [GO:0005654]; plasma membrane [GO:0005886]; spectrin [GO:0008091]	actomyosin structure organization [GO:0031032]; cell cycle [GO:0007049]; cell division [GO:0051301]; cortical actin cytoskeleton organization [GO:0030866]; positive regulation of protein localization to cell cortex [GO:1904778]	actin binding [GO:0003779]; PH domain binding [GO:0042731]; spectrin binding [GO:0030507]; structural molecule activity [GO:0005198]	Recovered	cluster 2	0	-0.877996	-0.315207	-0.240658		cluster 2	0	-1.75151	-2.01781	-1.53641		cluster 9	0	-0.0377905	-0.415363	0.714588	Decrease	cluster 6	0	-0.840205	0.100156	-0.955246		cluster 3	0	-0.873511	-1.70261	-1.29575
O43502	RAD51C	DNA repair protein RAD51 homolog 3 (R51H3) (RAD51 homolog C) (RAD51-like protein 2)	cell junction [GO:0030054]; cytoplasm [GO:0005737]; cytosol [GO:0005829]; intracellular membrane-bounded organelle [GO:0043231]; mitochondrion [GO:0005739]; nucleoplasm [GO:0005654]; nucleus [GO:0005634]; perinuclear region of cytoplasm [GO:0048471]; Rad51B-Rad51C-Rad51D-XRCC2 complex [GO:0033063]; Rad51C-XRCC3 complex [GO:0033065]; replication fork [GO:0005657]	DNA recombination [GO:0006310]; DNA repair [GO:0006281]; double-strand break repair via homologous recombination [GO:0000724]; female meiosis sister chromatid cohesion [GO:0007066]; male meiosis I [GO:0007141]; meiotic DNA recombinase assembly [GO:0000707]; positive regulation of G2/M transition of mitotic cell cycle [GO:0010971]; reciprocal meiotic recombination [GO:0007131]; sister chromatid co…	ATP binding [GO:0005524]; ATP-dependent DNA damage sensor activity [GO:0140664]; crossover junction DNA endonuclease activity [GO:0008821]; DNA binding [GO:0003677]; four-way junction DNA binding [GO:0000400]	Recovered	cluster 2	0	-1.02026	-0.797348	-0.51238
O43865	AHCYL1	S-adenosylhomocysteine hydrolase-like protein 1 (DC-expressed AHCY-like molecule) (IP(3)Rs binding protein released with IP(3)) (IRBIT) (Putative adenosylhomocysteinase 2) (S-adenosyl-L-homocysteine hydrolase 2) (AdoHcyase 2)	apical plasma membrane [GO:0016324]; cytoplasm [GO:0005737]; cytosol [GO:0005829]; endoplasmic reticulum membrane [GO:0005789]; extracellular exosome [GO:0070062]; mitochondria-associated endoplasmic reticulum membrane [GO:0044233]	angiotensin-activated signaling pathway [GO:0038166]; apoptotic process [GO:0006915]; epithelial fluid transport [GO:0042045]; mitochondrion-endoplasmic reticulum membrane tethering [GO:1990456]; one-carbon metabolic process [GO:0006730]; positive regulation of sodium ion transport [GO:0010765]; protein export from nucleus [GO:0006611]; regulation of monoatomic anion transport [GO:0044070]; regul…	enzyme regulator activity [GO:0030234]; identical protein binding [GO:0042802]; RNA binding [GO:0003723]	Recovered	cluster 2	0	-1.08747	-0.636237	-0.487614		cluster 2	0	-1.99091	-1.98747	-2.00823		cluster 5	0	0.878447	-0.57636	0.814925		cluster 4	0	-1.96592	-0.059877	-1.30254		cluster 3	0	-0.903437	-1.35124	-1.52061
O60264	SMARCA5	SWI/SNF-related matrix-associated actin-dependent regulator of chromatin subfamily A member 5 (SWI/SNF-related matrix-associated actin-dependent regulator of chromatin A5) (EC 3.6.4.-) (Sucrose nonfermenting protein 2 homolog) (hSNF2H)	ACF complex [GO:0016590]; B-WICH complex [GO:0110016]; CHRAC [GO:0008623]; chromatin silencing complex [GO:0005677]; condensed chromosome [GO:0000793]; fibrillar center [GO:0001650]; NoRC complex [GO:0090536]; nucleolus [GO:0005730]; nucleoplasm [GO:0005654]; nucleus [GO:0005634]; NURF complex [GO:0016589]; pericentric heterochromatin [GO:0005721]; RSF complex [GO:0031213]; site of double-strand …	cellular response to leukemia inhibitory factor [GO:1990830]; chromatin organization [GO:0006325]; chromatin remodeling [GO:0006338]; DNA damage response [GO:0006974]; DNA repair [GO:0006281]; DNA-templated transcription initiation [GO:0006352]; heterochromatin formation [GO:0031507]; negative regulation of mitotic chromosome condensation [GO:1905213]; negative regulation of transcription by RNA …	ATP binding [GO:0005524]; ATP hydrolysis activity [GO:0016887]; ATP-dependent activity, acting on DNA [GO:0008094]; ATP-dependent chromatin remodeler activity [GO:0140658]; DNA binding [GO:0003677]; helicase activity [GO:0004386]; histone binding [GO:0042393]; histone octamer slider activity [GO:0140751]; nucleosome binding [GO:0031491]	Recovered	cluster 2	0	-0.945178	-0.0937471	-0.0423966
O60488	ACSL4	Long-chain-fatty-acid--CoA ligase 4 (EC 6.2.1.3) (Arachidonate--CoA ligase) (EC 6.2.1.15) (Long-chain acyl-CoA synthetase 4) (LACS 4)	cytoplasm [GO:0005737]; endoplasmic reticulum [GO:0005783]; endoplasmic reticulum membrane [GO:0005789]; extracellular exosome [GO:0070062]; lipid droplet [GO:0005811]; membrane [GO:0016020]; mitochondria-associated endoplasmic reticulum membrane [GO:0044233]; mitochondrial outer membrane [GO:0005741]; peroxisomal membrane [GO:0005778]; plasma membrane [GO:0005886]	embryonic process involved in female pregnancy [GO:0060136]; fatty acid metabolic process [GO:0006631]; lipid biosynthetic process [GO:0008610]; lipid metabolic process [GO:0006629]; long-chain fatty acid metabolic process [GO:0001676]; long-chain fatty-acyl-CoA biosynthetic process [GO:0035338]; long-chain fatty-acyl-CoA metabolic process [GO:0035336]; negative regulation of prostaglandin secret…	arachidonate-CoA ligase activity [GO:0047676]; ATP binding [GO:0005524]; long-chain fatty acid-CoA ligase activity [GO:0004467]; palmitoyl-CoA ligase activity [GO:0090433]; very long-chain fatty acid-CoA ligase activity [GO:0031957]	Recovered	cluster 2	0	-1.60912	-1.07843	-0.720063																				cluster 9	0	1.22767	-1.04547	0.90046
O60658	PDE8A	High affinity cAMP-specific and IBMX-insensitive 3',5'-cyclic phosphodiesterase 8A (EC 3.1.4.53)	cytosol [GO:0005829]; extracellular exosome [GO:0070062]; nucleus [GO:0005634]; perinuclear region of cytoplasm [GO:0048471]	cAMP catabolic process [GO:0006198]; cAMP-mediated signaling [GO:0019933]; cellular response to epidermal growth factor stimulus [GO:0071364]; positive regulation of ERK1 and ERK2 cascade [GO:0070374]; regulation of DNA-templated transcription [GO:0006355]	3',5'-cyclic-AMP phosphodiesterase activity [GO:0004115]; 3',5'-cyclic-GMP phosphodiesterase activity [GO:0047555]; kinase binding [GO:0019900]; metal ion binding [GO:0046872]; protein kinase activator activity [GO:0030295]	Recovered	cluster 2	0	-1.45829	-0.765619	-0.68816		cluster 2	0	-2.00616	-2.04207	-1.61848														cluster 3	0	-0.54787	-1.27645	-0.930316
O75116	ROCK2	Rho-associated protein kinase 2 (EC 2.7.11.1) (Rho kinase 2) (Rho-associated, coiled-coil-containing protein kinase 2) (Rho-associated, coiled-coil-containing protein kinase II) (ROCK-II) (p164 ROCK-2)	centrosome [GO:0005813]; cytoplasm [GO:0005737]; cytoplasmic ribonucleoprotein granule [GO:0036464]; cytoskeleton [GO:0005856]; cytosol [GO:0005829]; nucleus [GO:0005634]; plasma membrane [GO:0005886]	actin cytoskeleton organization [GO:0030036]; actomyosin structure organization [GO:0031032]; aortic valve morphogenesis [GO:0003180]; blood vessel diameter maintenance [GO:0097746]; canonical NF-kappaB signal transduction [GO:0007249]; cellular response to acetylcholine [GO:1905145]; cellular response to testosterone stimulus [GO:0071394]; centrosome duplication [GO:0051298]; cortical actin cyto…	ATP binding [GO:0005524]; endopeptidase activator activity [GO:0061133]; metal ion binding [GO:0046872]; protease binding [GO:0002020]; protein serine kinase activity [GO:0106310]; protein serine/threonine kinase activity [GO:0004674]; Rho-dependent protein serine/threonine kinase activity [GO:0072518]; RNA binding [GO:0003723]; small GTPase binding [GO:0031267]; structural molecule activity [GO:…	Recovered	cluster 2	0	-1.54022	-1.03785	-0.544335		cluster 2	0	-1.22048	-0.47417	-1.02157		cluster 3	0	-2.48557	-2.12543	-1.26064		cluster 1	0	0.945349	1.08758	0.716306		cluster 8	0	0.319745	0.563682	-0.477235
O75179	ANKRD17	Ankyrin repeat domain-containing protein 17 (Gene trap ankyrin repeat protein) (Serologically defined breast cancer antigen NY-BR-16)	chromatin [GO:0000785]; cytoplasm [GO:0005737]; male germ cell nucleus [GO:0001673]; membrane [GO:0016020]; nuclear membrane [GO:0031965]; nucleoplasm [GO:0005654]; nucleus [GO:0005634]	blood vessel maturation [GO:0001955]; defense response to bacterium [GO:0042742]; innate immune response [GO:0045087]; negative regulation of smooth muscle cell differentiation [GO:0051151]; positive regulation of canonical NF-kappaB signal transduction [GO:0043123]; positive regulation of cell cycle [GO:0045787]; positive regulation of G1/S transition of mitotic cell cycle [GO:1900087]; positive…	chromatin binding [GO:0003682]; RNA binding [GO:0003723]	Recovered	cluster 2	0	-1.51707	-0.856482	-0.596452
O75351	VPS4B	Vacuolar protein sorting-associated protein 4B (EC 3.6.4.6) (Cell migration-inducing gene 1 protein) (Suppressor of K(+) transport growth defect 1) (Protein SKD1)	ATPase complex [GO:1904949]; centrosome [GO:0005813]; cytoplasm [GO:0005737]; cytosol [GO:0005829]; endosome [GO:0005768]; endosome membrane [GO:0010008]; extracellular exosome [GO:0070062]; Flemming body [GO:0090543]; late endosome membrane [GO:0031902]; midbody [GO:0030496]; nuclear pore [GO:0005643]; nucleus [GO:0005634]; plasma membrane [GO:0005886]; spindle pole [GO:0000922]	angiogenesis [GO:0001525]; autophagosome maturation [GO:0097352]; autophagy [GO:0006914]; canonical Wnt signaling pathway [GO:0060070]; cholesterol transport [GO:0030301]; endosomal transport [GO:0016197]; endosome to lysosome transport via multivesicular body sorting pathway [GO:0032510]; ESCRT III complex disassembly [GO:1904903]; establishment of blood-brain barrier [GO:0060856]; late endosoma…	ATP binding [GO:0005524]; ATP hydrolysis activity [GO:0016887]; identical protein binding [GO:0042802]; protein homodimerization activity [GO:0042803]; protein-containing complex binding [GO:0044877]	Recovered	cluster 2	0	-0.820556	-0.434744	-0.343653		cluster 2	0	-1.66958	-1.57598	-1.20539														cluster 3	0	-0.849023	-1.14124	-0.861733
O75369	FLNB	Filamin-B (FLN-B) (ABP-278) (ABP-280 homolog) (Actin-binding-like protein) (Beta-filamin) (Filamin homolog 1) (Fh1) (Filamin-3) (Thyroid autoantigen) (Truncated actin-binding protein) (Truncated ABP)	actin cytoskeleton [GO:0015629]; brush border [GO:0005903]; cell cortex [GO:0005938]; cytoplasm [GO:0005737]; cytosol [GO:0005829]; extracellular exosome [GO:0070062]; focal adhesion [GO:0005925]; membrane [GO:0016020]; phagocytic vesicle [GO:0045335]; plasma membrane [GO:0005886]; stress fiber [GO:0001725]; Z disc [GO:0030018]	actin cytoskeleton organization [GO:0030036]; cellular response to type II interferon [GO:0071346]; epithelial cell morphogenesis [GO:0003382]; keratinocyte development [GO:0003334]; signal transduction [GO:0007165]; skeletal muscle tissue development [GO:0007519]	actin binding [GO:0003779]; actin filament binding [GO:0051015]; cadherin binding [GO:0045296]; identical protein binding [GO:0042802]; RNA binding [GO:0003723]	Recovered	cluster 2	0	-0.673082	-0.06008	0.203847																				cluster 3	0	-2.54689	-3.31545	-2.62225
O75431	MTX2	Metaxin-2 (Mitochondrial outer membrane import complex protein 2)	cytoplasm [GO:0005737]; MIB complex [GO:0140275]; mitochondrial outer membrane [GO:0005741]; mitochondrion [GO:0005739]; nucleolus [GO:0005730]; SAM complex [GO:0001401]	inner mitochondrial membrane organization [GO:0007007]; mitochondrial transport [GO:0006839]; mitochondrion organization [GO:0007005]; protein insertion into mitochondrial outer membrane [GO:0045040]		Recovered	cluster 2	0	-0.635078	-0.499531	-0.292183
O75616	ERAL1	GTPase Era, mitochondrial (H-ERA) (hERA) (Conserved ERA-like GTPase) (CEGA) (ERA-W) (ERA-like protein 1)	cytosol [GO:0005829]; mitochondrial inner membrane [GO:0005743]; mitochondrial matrix [GO:0005759]; mitochondrion [GO:0005739]	ribosomal small subunit assembly [GO:0000028]	GTP binding [GO:0005525]; ribosomal small subunit binding [GO:0043024]; RNA binding [GO:0003723]; rRNA binding [GO:0019843]	Recovered	cluster 2	0	-1.15527	-0.459271	-0.38884							Decrease	cluster 1	0	-0.986151	-2.07752	-1.91339	Increase	cluster 3	0	-0.169122	1.61825	1.52455
O75663	TIPRL	TIP41-like protein (Putative MAPK-activating protein PM10) (Type 2A-interacting protein) (TIP)	cytosol [GO:0005829]	DNA damage checkpoint signaling [GO:0000077]; negative regulation of phosphoprotein phosphatase activity [GO:0032515]; TOR signaling [GO:0031929]		Recovered	cluster 2	0	-1.16486	-0.416395	-0.195353		cluster 2	0	-1.63144	-1.41765	-1.35377													Decrease	cluster 1	0	-0.466583	-1.00126	-1.15842
O75822	EIF3J	Eukaryotic translation initiation factor 3 subunit J (eIF3j) (Eukaryotic translation initiation factor 3 subunit 1) (eIF-3-alpha) (eIF3 p35)	cytosol [GO:0005829]; eukaryotic 43S preinitiation complex [GO:0016282]; eukaryotic 48S preinitiation complex [GO:0033290]; eukaryotic translation initiation factor 3 complex [GO:0005852]	formation of cytoplasmic translation initiation complex [GO:0001732]; translational initiation [GO:0006413]	identical protein binding [GO:0042802]; translation initiation factor activity [GO:0003743]	Recovered	cluster 2	0	-0.814568	-0.114773	-0.100285		cluster 2	0	-1.78205	-1.67922	-1.5903														cluster 3	0	-0.967486	-1.56445	-1.49001
O76070	SNCG	Gamma-synuclein (Breast cancer-specific gene 1 protein) (Persyn) (Synoretin) (SR)	axon terminus [GO:0043679]; centrosome [GO:0005813]; cytoplasm [GO:0005737]; extracellular exosome [GO:0070062]; neuronal cell body [GO:0043025]; perinuclear region of cytoplasm [GO:0048471]; spindle [GO:0005819]	adult locomotory behavior [GO:0008344]; chemical synaptic transmission [GO:0007268]; protein secretion [GO:0009306]; regulation of dopamine secretion [GO:0014059]; regulation of neurotransmitter secretion [GO:0046928]; synapse organization [GO:0050808]; synaptic vesicle endocytosis [GO:0048488]	cuprous ion binding [GO:1903136]	Recovered	cluster 2	0	-0.70411	-0.133205	0.179879		cluster 2	0	-1.3363	-1.28989	-1.11865	Decrease	cluster 1	0	-0.620008	-1.11636	-1.06846	Increase	cluster 3	0	-0.0841013	0.98315	1.24834	Decrease	cluster 1	0	-0.632189	-1.15668	-1.29853
O94842	TOX4	TOX high mobility group box family member 4 (Epidermal Langerhans cell protein LCP1)	chromatin [GO:0000785]; nucleus [GO:0005634]; PTW/PP1 phosphatase complex [GO:0072357]	regulation of transcription by RNA polymerase II [GO:0006357]	chromatin DNA binding [GO:0031490]	Recovered	cluster 2	0	-1.11129	-0.191056	-0.264141
O95210	STBD1	Starch-binding domain-containing protein 1 (Genethonin-1) (Glycophagy cargo receptor STBD1)	endoplasmic reticulum [GO:0005783]; endoplasmic reticulum membrane [GO:0005789]; ficolin-1-rich granule membrane [GO:0101003]; membrane [GO:0016020]; perinuclear region of cytoplasm [GO:0048471]; phagophore assembly site membrane [GO:0034045]; plasma membrane [GO:0005886]; T-tubule [GO:0030315]; tertiary granule membrane [GO:0070821]	glycogen catabolic process [GO:0005980]; glycophagy [GO:0061723]; intracellular transport [GO:0046907]; substrate localization to autophagosome [GO:0061753]	cargo receptor activity [GO:0038024]; enzyme binding [GO:0019899]; glycogen binding [GO:2001069]; polysaccharide binding [GO:0030247]; starch binding [GO:2001070]	Recovered	cluster 2	0	-0.604174	-0.139933	0.188248		cluster 4	0	-1.81163	-3.39267	-1.98705														cluster 3	0	-1.20745	-3.25273	-2.1753
O95433	AHSA1	Activator of 90 kDa heat shock protein ATPase homolog 1 (AHA1) (p38)	cytosol [GO:0005829]; endoplasmic reticulum [GO:0005783]; extracellular exosome [GO:0070062]	positive regulation of ATP-dependent activity [GO:0032781]; protein folding [GO:0006457]	ATPase activator activity [GO:0001671]; cadherin binding [GO:0045296]; Hsp90 protein binding [GO:0051879]; protein-folding chaperone binding [GO:0051087]	Recovered	cluster 2	0	-0.739896	-0.371512	-0.340491		cluster 4	0	-1.73394	-1.90162	-1.3083														cluster 3	0	-0.994041	-1.53011	-0.967813
O95630	STAMBP	STAM-binding protein (EC 3.4.19.-) (Associated molecule with the SH3 domain of STAM) (Endosome-associated ubiquitin isopeptidase)	cleavage furrow [GO:0032154]; cytosol [GO:0005829]; early endosome [GO:0005769]; endosome [GO:0005768]; extracellular exosome [GO:0070062]; nucleoplasm [GO:0005654]; nucleus [GO:0005634]; plasma membrane [GO:0005886]	hippocampal neuron apoptotic process [GO:0110088]; mitotic cytokinesis [GO:0000281]; negative regulation of hippocampal neuron apoptotic process [GO:0110091]; negative regulation of phosphatidylinositol 3-kinase/protein kinase B signal transduction [GO:0051898]; negative regulation of Ras protein signal transduction [GO:0046580]; positive regulation of cell population proliferation [GO:0008284]; …	deubiquitinase activity [GO:0101005]; K63-linked deubiquitinase activity [GO:0061578]; metal ion binding [GO:0046872]; metal-dependent deubiquitinase activity [GO:0140492]; protein domain specific binding [GO:0019904]	Recovered	cluster 2	0	-0.821335	-0.160354	0.0410719		cluster 4	0	-1.33422	-1.79697	-1.03665														cluster 3	0	-0.512884	-1.63661	-1.07772
O95671	ASMTL	Probable bifunctional dTTP/UTP pyrophosphatase/methyltransferase protein [Includes: dTTP/UTP pyrophosphatase (dTTPase/UTPase) (EC 3.6.1.9) (Nucleoside triphosphate pyrophosphatase) (Nucleotide pyrophosphatase) (Nucleotide PPase); N-acetylserotonin O-methyltransferase-like protein (ASMTL) (EC 2.1.1.-)]	cytosol [GO:0005829]	methylation [GO:0032259]; nucleotide metabolic process [GO:0009117]	dTTP diphosphatase activity [GO:0036218]; nucleoside triphosphate diphosphatase activity [GO:0047429]; O-methyltransferase activity [GO:0008171]; UTP diphosphatase activity [GO:0036221]	Recovered	cluster 2	0	-1.14195	-0.536259	-0.459785																			Decrease	cluster 1	0	-0.697662	-1.96176	-2.1262
O95684	CEP43	Centrosomal protein 43 (FGFR1 oncogene partner)	cell projection [GO:0042995]; centriole [GO:0005814]; centrosome [GO:0005813]; cytosol [GO:0005829]; nucleus [GO:0005634]; perinuclear region of cytoplasm [GO:0048471]	cell projection organization [GO:0030030]; microtubule anchoring [GO:0034453]; negative regulation of protein kinase activity [GO:0006469]; positive regulation of cell growth [GO:0030307]; positive regulation of cell migration [GO:0030335]; positive regulation of cell population proliferation [GO:0008284]	protein homodimerization activity [GO:0042803]; protein kinase binding [GO:0019901]; protein tyrosine kinase inhibitor activity [GO:0030292]	Recovered	cluster 2	0	-1.09202	-0.177997	0.159885																			Decrease	cluster 1	0	-1.08707	-1.42444	-2.02792
O95707	POP4	Ribonuclease P protein subunit p29 (hPOP4)	multimeric ribonuclease P complex [GO:0030681]; nucleolus [GO:0005730]; nucleoplasm [GO:0005654]; ribonuclease MRP complex [GO:0000172]; ribonuclease P complex [GO:0030677]	rRNA processing [GO:0006364]; tRNA 5'-leader removal [GO:0001682]	ribonuclease P activity [GO:0004526]; ribonuclease P RNA binding [GO:0033204]	Recovered	cluster 2	0	-1.08979	-0.296236	-0.271464
P00387	CYB5R3	NADH-cytochrome b5 reductase 3 (B5R) (Cytochrome b5 reductase) (EC 1.6.2.2) (Diaphorase-1)	azurophil granule lumen [GO:0035578]; cytoplasm [GO:0005737]; cytosol [GO:0005829]; endoplasmic reticulum [GO:0005783]; endoplasmic reticulum membrane [GO:0005789]; extracellular region [GO:0005576]; hemoglobin complex [GO:0005833]; lipid droplet [GO:0005811]; membrane [GO:0016020]; mitochondrial membrane [GO:0031966]; mitochondrial outer membrane [GO:0005741]; mitochondrion [GO:0005739]; nitric-…	blood circulation [GO:0008015]; cholesterol biosynthetic process [GO:0006695]; nitric oxide biosynthetic process [GO:0006809]	ADP binding [GO:0043531]; AMP binding [GO:0016208]; cytochrome-b5 reductase activity, acting on NAD(P)H [GO:0004128]; FAD binding [GO:0071949]; NAD binding [GO:0051287]	Recovered	cluster 2	0	-0.629346	-0.255039	-0.0304683
P00491	PNP	Purine nucleoside phosphorylase (PNP) (EC 2.4.2.1) (Inosine phosphorylase) (Inosine-guanosine phosphorylase)	cytoplasm [GO:0005737]; cytosol [GO:0005829]; extracellular exosome [GO:0070062]; extracellular region [GO:0005576]; ficolin-1-rich granule lumen [GO:1904813]; secretory granule lumen [GO:0034774]	allantoin metabolic process [GO:0000255]; dAMP catabolic process [GO:0046059]; deoxyadenosine catabolic process [GO:0006157]; deoxyinosine catabolic process [GO:0006149]; immune response [GO:0006955]; IMP catabolic process [GO:0006204]; inosine catabolic process [GO:0006148]; nicotinamide riboside catabolic process [GO:0006738]; nucleobase-containing compound metabolic process [GO:0006139]; nucle…	guanosine phosphorylase activity [GO:0047975]; identical protein binding [GO:0042802]; nucleoside binding [GO:0001882]; phosphate ion binding [GO:0042301]; purine nucleobase binding [GO:0002060]; purine-nucleoside phosphorylase activity [GO:0004731]	Recovered	cluster 2	0	-1.12985	-0.387957	-0.406824																			Decrease	cluster 1	0	-0.619175	-1.63256	-1.83734
P04150	NR3C1	Glucocorticoid receptor (GR) (Nuclear receptor subfamily 3 group C member 1)	centrosome [GO:0005813]; chromatin [GO:0000785]; cytoplasm [GO:0005737]; cytosol [GO:0005829]; membrane [GO:0016020]; mitochondrial matrix [GO:0005759]; nuclear speck [GO:0016607]; nucleoplasm [GO:0005654]; nucleus [GO:0005634]; protein-containing complex [GO:0032991]; spindle [GO:0005819]; synapse [GO:0045202]	adrenal gland development [GO:0030325]; apoptotic process [GO:0006915]; astrocyte differentiation [GO:0048708]; cell division [GO:0051301]; cellular response to dexamethasone stimulus [GO:0071549]; cellular response to glucocorticoid stimulus [GO:0071385]; cellular response to steroid hormone stimulus [GO:0071383]; cellular response to transforming growth factor beta stimulus [GO:0071560]; chroma…	core promoter sequence-specific DNA binding [GO:0001046]; DNA-binding transcription activator activity, RNA polymerase II-specific [GO:0001228]; DNA-binding transcription factor activity [GO:0003700]; DNA-binding transcription factor activity, RNA polymerase II-specific [GO:0000981]; DNA-binding transcription repressor activity, RNA polymerase II-specific [GO:0001227]; estrogen response element b…	Recovered	cluster 2	0	-0.746803	-0.562805	-0.217179		cluster 3	0	-1.70366	-2.51428	-2.58695													Decrease	cluster 1	0	-0.956861	-1.95148	-2.36978
P05423	POLR3D	DNA-directed RNA polymerase III subunit RPC4 (RNA polymerase III subunit C4) (DNA-directed RNA polymerase III subunit D) (Protein BN51) (RNA polymerase III 47 kDa subunit) (RPC53 homolog)	cytosol [GO:0005829]; nucleoplasm [GO:0005654]; RNA polymerase III complex [GO:0005666]	defense response to virus [GO:0051607]; innate immune response [GO:0045087]; positive regulation of innate immune response [GO:0045089]; positive regulation of interferon-beta production [GO:0032728]; tRNA transcription by RNA polymerase III [GO:0042797]	chromatin binding [GO:0003682]; DNA binding [GO:0003677]	Recovered	cluster 2	0	-1.42912	-0.720702	-0.312123
P06703	S100A6	Protein S100-A6 (Calcyclin) (Growth factor-inducible protein 2A9) (MLN 4) (Prolactin receptor-associated protein) (PRA) (S100 calcium-binding protein A6)	collagen-containing extracellular matrix [GO:0062023]; cytoplasm [GO:0005737]; cytoplasmic side of plasma membrane [GO:0009898]; cytosol [GO:0005829]; extracellular exosome [GO:0070062]; extracellular region [GO:0005576]; nuclear envelope [GO:0005635]; nucleus [GO:0005634]; perinuclear region of cytoplasm [GO:0048471]; plasma membrane [GO:0005886]; ruffle [GO:0001726]	axonogenesis [GO:0007409]; positive regulation of fibroblast proliferation [GO:0048146]; signal transduction [GO:0007165]	calcium ion binding [GO:0005509]; calcium-dependent protein binding [GO:0048306]; monoatomic ion transmembrane transporter activity [GO:0015075]; protein homodimerization activity [GO:0042803]; S100 protein binding [GO:0044548]; tropomyosin binding [GO:0005523]; zinc ion binding [GO:0008270]	Recovered	cluster 2	0	-0.618703	-0.147683	0.107823	Recovered	cluster 1	0	-2.56652	-1.22353	-0.911216								cluster 5	0	1.92146	1.71735	0.798303		cluster 2	0	-1.94782	-1.07585	-1.01904
P06744	GPI	Glucose-6-phosphate isomerase (GPI) (EC 5.3.1.9) (Autocrine motility factor) (AMF) (Neuroleukin) (NLK) (Phosphoglucose isomerase) (PGI) (Phosphohexose isomerase) (PHI) (Sperm antigen 36) (SA-36)	ciliary membrane [GO:0060170]; cytosol [GO:0005829]; extracellular exosome [GO:0070062]; extracellular region [GO:0005576]; ficolin-1-rich granule lumen [GO:1904813]; membrane [GO:0016020]; secretory granule lumen [GO:0034774]	carbohydrate metabolic process [GO:0005975]; erythrocyte homeostasis [GO:0034101]; gluconeogenesis [GO:0006094]; glucose 6-phosphate metabolic process [GO:0051156]; glucose homeostasis [GO:0042593]; glycolytic process [GO:0006096]; hemostasis [GO:0007599]; humoral immune response [GO:0006959]; in utero embryonic development [GO:0001701]; learning or memory [GO:0007611]; mesoderm formation [GO:000…	carbohydrate derivative binding [GO:0097367]; cytokine activity [GO:0005125]; glucose-6-phosphate isomerase activity [GO:0004347]; growth factor activity [GO:0008083]; monosaccharide binding [GO:0048029]; ubiquitin protein ligase binding [GO:0031625]	Recovered	cluster 2	0	-1.39468	-0.785866	-0.62728		cluster 2	0	-1.55549	-1.63925	-1.34584							Decrease	cluster 6	0	-1.34213	0.510051	-1.84052	Decrease	cluster 1	0	-0.160812	-0.853384	-0.718562
P08195	SLC3A2	Amino acid transporter heavy chain SLC3A2 (4F2 cell-surface antigen heavy chain) (4F2hc) (4F2 heavy chain antigen) (Lymphocyte activation antigen 4F2 large subunit) (Solute carrier family 3 member 2) (CD antigen CD98)	amino acid transport complex [GO:1990184]; anchoring junction [GO:0070161]; apical plasma membrane [GO:0016324]; apical pole of neuron [GO:0044225]; basal plasma membrane [GO:0009925]; basolateral plasma membrane [GO:0016323]; cell surface [GO:0009986]; extracellular exosome [GO:0070062]; lysosomal membrane [GO:0005765]; melanosome [GO:0042470]; membrane [GO:0016020]; nucleoplasm [GO:0005654]; pl…	amino acid transport [GO:0006865]; calcium ion transport [GO:0006816]; carbohydrate metabolic process [GO:0005975]; isoleucine transport [GO:0015818]; L-alanine import across plasma membrane [GO:1904273]; L-histidine transport [GO:1902024]; L-leucine import across plasma membrane [GO:1903801]; leucine import across plasma membrane [GO:0098713]; leucine transport [GO:0015820]; methionine transport…	aromatic amino acid transmembrane transporter activity [GO:0015173]; cadherin binding [GO:0045296]; calcium:sodium antiporter activity [GO:0005432]; double-stranded RNA binding [GO:0003725]; exogenous protein binding [GO:0140272]; L-alanine transmembrane transporter activity [GO:0015180]; L-leucine transmembrane transporter activity [GO:0015190]; neutral L-amino acid secondary active transmembran…	Recovered	cluster 2	0	-0.694829	-0.250186	-0.19678		cluster 4	0	-1.71337	-2.12113	-1.51723		cluster 10	0	-0.307606	-0.874382	-0.0302366		cluster 2	0	-0.387223	0.624196	-0.166543		cluster 3	0	-1.01854	-1.87094	-1.32045
P08670	VIM	Vimentin	axon [GO:0030424]; cell leading edge [GO:0031252]; cytoplasm [GO:0005737]; cytoskeleton [GO:0005856]; cytosol [GO:0005829]; extracellular exosome [GO:0070062]; focal adhesion [GO:0005925]; intermediate filament [GO:0005882]; intermediate filament cytoskeleton [GO:0045111]; microtubule organizing center [GO:0005815]; nuclear matrix [GO:0016363]; peroxisome [GO:0005777]; phagocytic vesicle [GO:0045…	astrocyte development [GO:0014002]; Bergmann glial cell differentiation [GO:0060020]; cellular response to lipopolysaccharide [GO:0071222]; cellular response to muramyl dipeptide [GO:0071225]; cellular response to type II interferon [GO:0071346]; intermediate filament organization [GO:0045109]; lens fiber cell development [GO:0070307]; negative regulation of neuron projection development [GO:0010…	double-stranded RNA binding [GO:0003725]; identical protein binding [GO:0042802]; keratin filament binding [GO:1990254]; molecular adaptor activity [GO:0060090]; protein domain specific binding [GO:0019904]; scaffold protein binding [GO:0097110]; structural constituent of cytoskeleton [GO:0005200]; structural constituent of eye lens [GO:0005212]	Recovered	cluster 2	0	-1.05547	-0.546389	-0.472681		cluster 3	0	-1.34402	-1.73522	-1.41462		cluster 6	0	-0.877153	-1.48077	-0.817811		cluster 2	0	-0.178314	0.934384	0.34513		cluster 3	0	-0.288551	-1.18883	-0.941943
P0CAP2	POLR2M	DNA-directed RNA polymerase II subunit GRINL1A (DNA-directed RNA polymerase II subunit M) (Glutamate receptor-like protein 1A)	I band [GO:0031674]; neuronal cell body [GO:0043025]; nuclear envelope [GO:0005635]; RNA polymerase II, core complex [GO:0005665]; RNA polymerase II, holoenzyme [GO:0016591]; transcription preinitiation complex [GO:0097550]	intracellular signal transduction [GO:0035556]; maintenance of ER location [GO:0051685]; transcription elongation by RNA polymerase II [GO:0006368]	RNA polymerase II complex binding [GO:0000993]; transcription elongation factor activity [GO:0003711]	Recovered	cluster 2	0	-1.49594	-0.537314	-0.663284																				cluster 7	0	-1.07733	-0.973155	-1.33968
P0DMV9	HSPA1B	Heat shock 70 kDa protein 1B (Heat shock 70 kDa protein 2) (HSP70-2) (HSP70.2) (Heat shock protein family A member 1B)	aggresome [GO:0016235]; blood microparticle [GO:0072562]; centriole [GO:0005814]; centrosome [GO:0005813]; cytoplasm [GO:0005737]; cytosol [GO:0005829]; endoplasmic reticulum [GO:0005783]; extracellular exosome [GO:0070062]; extracellular region [GO:0005576]; ficolin-1-rich granule lumen [GO:1904813]; focal adhesion [GO:0005925]; inclusion body [GO:0016234]; mitochondrion [GO:0005739]; nuclear sp…	ATP metabolic process [GO:0046034]; cellular heat acclimation [GO:0070370]; cellular response to heat [GO:0034605]; cellular response to oxidative stress [GO:0034599]; cellular response to steroid hormone stimulus [GO:0071383]; chaperone cofactor-dependent protein refolding [GO:0051085]; mRNA catabolic process [GO:0006402]; negative regulation of apoptotic process [GO:0043066]; negative regulatio…	ATP binding [GO:0005524]; ATP hydrolysis activity [GO:0016887]; ATP-dependent protein disaggregase activity [GO:0140545]; ATP-dependent protein folding chaperone [GO:0140662]; C3HC4-type RING finger domain binding [GO:0055131]; enzyme binding [GO:0019899]; G protein-coupled receptor binding [GO:0001664]; heat shock protein binding [GO:0031072]; histone deacetylase binding [GO:0042826]; protein fo…	Recovered	cluster 2	0	-0.891654	-0.378275	-0.322901
P11498	PC	Pyruvate carboxylase, mitochondrial (EC 6.4.1.1) (Pyruvic carboxylase) (PCB)	cytoplasm [GO:0005737]; cytosol [GO:0005829]; mitochondrial matrix [GO:0005759]; mitochondrion [GO:0005739]	gluconeogenesis [GO:0006094]; lipid metabolic process [GO:0006629]; NADH metabolic process [GO:0006734]; NADP metabolic process [GO:0006739]; negative regulation of gene expression [GO:0010629]; positive regulation by host of viral process [GO:0044794]; pyruvate metabolic process [GO:0006090]; viral release from host cell [GO:0019076]; viral RNA genome packaging [GO:0019074]	ATP binding [GO:0005524]; biotin binding [GO:0009374]; identical protein binding [GO:0042802]; metal ion binding [GO:0046872]; pyruvate carboxylase activity [GO:0004736]	Recovered	cluster 2	0	-0.384991	-0.0967414	-0.109155		cluster 3	0	-1.00719	-1.42419	-1.09128		cluster 6	0	-0.957435	-1.75404	-1.25002		cluster 2	0	0.572443	1.6573	1.14086		cluster 3	0	-0.622197	-1.32745	-0.98213
P13798	APEH	Acylamino-acid-releasing enzyme (AARE) (EC 3.4.19.1) (Acyl-peptide hydrolase) (APH) (Acylaminoacyl-peptidase) (Oxidized protein hydrolase) (OPH)	cytosol [GO:0005829]; extracellular exosome [GO:0070062]; extracellular region [GO:0005576]; ficolin-1-rich granule lumen [GO:1904813]; nuclear membrane [GO:0031965]	amyloid-beta metabolic process [GO:0050435]; proteolysis [GO:0006508]; translational termination [GO:0006415]	identical protein binding [GO:0042802]; omega peptidase activity [GO:0008242]; RNA binding [GO:0003723]; serine-type endopeptidase activity [GO:0004252]	Recovered	cluster 2	0	-0.722655	-0.152371	-0.155937		cluster 4	0	-1.5586	-2.54116	-1.57049														cluster 3	0	-0.835941	-2.38879	-1.41455
P13861	PRKAR2A	cAMP-dependent protein kinase type II-alpha regulatory subunit	cAMP-dependent protein kinase complex [GO:0005952]; centrosome [GO:0005813]; ciliary base [GO:0097546]; cytoplasm [GO:0005737]; cytosol [GO:0005829]; extracellular exosome [GO:0070062]; focal adhesion [GO:0005925]; membrane [GO:0016020]; nucleotide-activated protein kinase complex [GO:0031588]; plasma membrane [GO:0005886]; plasma membrane raft [GO:0044853]; protein-containing complex [GO:0032991]	intracellular signal transduction [GO:0035556]; negative regulation of cAMP-dependent protein kinase activity [GO:2000480]	cAMP binding [GO:0030552]; cAMP-dependent protein kinase inhibitor activity [GO:0004862]; cAMP-dependent protein kinase regulator activity [GO:0008603]; protein domain specific binding [GO:0019904]; protein kinase A catalytic subunit binding [GO:0034236]; ubiquitin protein ligase binding [GO:0031625]	Recovered	cluster 2	0	-1.02024	-0.391904	-0.351014
P14314	PRKCSH	Glucosidase 2 subunit beta (80K-H protein) (Glucosidase II subunit beta) (Protein kinase C substrate 60.1 kDa protein heavy chain) (PKCSH)	endoplasmic reticulum [GO:0005783]; endoplasmic reticulum lumen [GO:0005788]; glucosidase II complex [GO:0017177]; intracellular membrane-bounded organelle [GO:0043231]	intracellular signal transduction [GO:0035556]; liver development [GO:0001889]; N-glycan processing [GO:0006491]	calcium ion binding [GO:0005509]; phosphoprotein binding [GO:0051219]; protein kinase C binding [GO:0005080]; transmembrane transporter binding [GO:0044325]	Recovered	cluster 2	0	-1.27689	-0.375595	-0.425334	Decrease	cluster 7	0	-0.192044	-0.143144	-0.673147														cluster 8	0	1.08484	0.232451	-0.247813
P14618	PKM	Pyruvate kinase PKM (EC 2.7.1.40) (Cytosolic thyroid hormone-binding protein) (CTHBP) (Opa-interacting protein 3) (OIP-3) (Pyruvate kinase 2/3) (Pyruvate kinase muscle isozyme) (Threonine-protein kinase PKM2) (EC 2.7.11.1) (Thyroid hormone-binding protein 1) (THBP1) (Tumor M2-PK) (Tyrosine-protein kinase PKM2) (EC 2.7.10.2) (p58)	cilium [GO:0005929]; collagen-containing extracellular matrix [GO:0062023]; cytoplasm [GO:0005737]; cytosol [GO:0005829]; extracellular exosome [GO:0070062]; extracellular region [GO:0005576]; extracellular vesicle [GO:1903561]; ficolin-1-rich granule lumen [GO:1904813]; mitochondrion [GO:0005739]; nucleus [GO:0005634]; rough endoplasmic reticulum [GO:0005791]; secretory granule lumen [GO:0034774…	canonical glycolysis [GO:0061621]; cellular response to insulin stimulus [GO:0032869]; glycolytic process [GO:0006096]; phosphorylation [GO:0016310]; positive regulation of cytoplasmic translation [GO:2000767]; positive regulation of sprouting angiogenesis [GO:1903672]; positive regulation of transcription by RNA polymerase II [GO:0045944]; programmed cell death [GO:0012501]	ATP binding [GO:0005524]; cadherin binding [GO:0045296]; histone H3T11 kinase activity [GO:0035402]; magnesium ion binding [GO:0000287]; MHC class II protein complex binding [GO:0023026]; mRNA binding [GO:0003729]; potassium ion binding [GO:0030955]; protein homodimerization activity [GO:0042803]; protein tyrosine kinase activity [GO:0004713]; pyruvate kinase activity [GO:0004743]; RNA binding [G…	Recovered	cluster 2	0	-0.801385	-0.331436	-0.394476		cluster 2	0	-1.61513	-1.88242	-1.56375								cluster 4	0	-0.878567	-0.232437	-0.421546		cluster 3	0	-0.813747	-1.55098	-1.16927
P14868	DARS1	Aspartate--tRNA ligase, cytoplasmic (EC 6.1.1.12) (Aspartyl-tRNA synthetase) (AspRS) (Cell proliferation-inducing gene 40 protein)	aminoacyl-tRNA synthetase multienzyme complex [GO:0017101]; cytoplasm [GO:0005737]; cytosol [GO:0005829]; extracellular exosome [GO:0070062]; membrane [GO:0016020]; synapse [GO:0045202]	aspartyl-tRNA aminoacylation [GO:0006422]; protein-containing complex assembly [GO:0065003]; translation [GO:0006412]	aminoacylase activity [GO:0004046]; aspartate-tRNA ligase activity [GO:0004815]; ATP binding [GO:0005524]; RNA binding [GO:0003723]	Recovered	cluster 2	0	-1.40374	-0.38739	-0.735354
P15880	RPS2	Small ribosomal subunit protein uS5 (40S ribosomal protein S2) (40S ribosomal protein S4) (Protein LLRep3)	cytoplasm [GO:0005737]; cytosol [GO:0005829]; cytosolic ribosome [GO:0022626]; cytosolic small ribosomal subunit [GO:0022627]; extracellular exosome [GO:0070062]; focal adhesion [GO:0005925]; membrane [GO:0016020]; nucleoplasm [GO:0005654]; nucleus [GO:0005634]	cytoplasmic translation [GO:0002181]; positive regulation of ubiquitin-protein transferase activity [GO:0051443]; translation [GO:0006412]	cadherin binding [GO:0045296]; enzyme binding [GO:0019899]; fibroblast growth factor binding [GO:0017134]; mRNA binding [GO:0003729]; RNA binding [GO:0003723]; structural constituent of ribosome [GO:0003735]	Recovered	cluster 2	0	-1.06512	-0.432104	-0.263468		cluster 2	0	-1.40128	-1.48096	-1.24215		cluster 3	0	-2.31293	-2.52849	-1.87562		cluster 1	0	1.24781	2.09639	1.61216	Decrease	cluster 1	0	-0.336161	-1.04886	-0.978685
P16083	NQO2	Ribosyldihydronicotinamide dehydrogenase [quinone] (EC 1.10.5.1) (NRH dehydrogenase [quinone] 2) (NRH:quinone oxidoreductase 2) (Quinone reductase 2) (QR2)	cytosol [GO:0005829]; extracellular exosome [GO:0070062]; nucleoplasm [GO:0005654]	quinone catabolic process [GO:1901662]	chloride ion binding [GO:0031404]; dihydronicotinamide riboside quinone reductase activity [GO:0001512]; electron transfer activity [GO:0009055]; FAD binding [GO:0071949]; melatonin binding [GO:1904408]; NAD(P)H dehydrogenase (quinone) activity [GO:0003955]; oxidoreductase activity [GO:0016491]; oxidoreductase activity, acting on other nitrogenous compounds as donors [GO:0016661]; protein homodim…	Recovered	cluster 2	0	-1.50209	-1.18789	-0.14539																			Decrease	cluster 1	0	-0.00506654	-0.6149	-0.933035
P16435	POR	NADPH--cytochrome P450 reductase (CPR) (P450R) (EC 1.6.2.4)	cytosol [GO:0005829]; endoplasmic reticulum membrane [GO:0005789]; intracellular membrane-bounded organelle [GO:0043231]; membrane [GO:0016020]	cellular organofluorine metabolic process [GO:0090346]; electron transport chain [GO:0022900]; positive regulation of monooxygenase activity [GO:0032770]; response to hormone [GO:0009725]; xenobiotic metabolic process [GO:0006805]	flavin adenine dinucleotide binding [GO:0050660]; FMN binding [GO:0010181]; NADP binding [GO:0050661]; NADPH-hemoprotein reductase activity [GO:0003958]	Recovered	cluster 2	0	-1.25972	-1.01764	-0.515369		cluster 3	0	-1.6318	-1.49756	-1.94676													Decrease	cluster 1	0	-0.372086	-0.479922	-1.43139
P18031	PTPN1	Tyrosine-protein phosphatase non-receptor type 1 (EC 3.1.3.48) (Protein-tyrosine phosphatase 1B) (PTP-1B)	cytoplasm [GO:0005737]; cytoplasmic side of endoplasmic reticulum membrane [GO:0098554]; cytosol [GO:0005829]; early endosome [GO:0005769]; endoplasmic reticulum [GO:0005783]; endosome lumen [GO:0031904]; mitochondrial crista [GO:0030061]; mitochondrial matrix [GO:0005759]; protein-containing complex [GO:0032991]; sorting endosome [GO:0097443]	actin cytoskeleton organization [GO:0030036]; cellular response to unfolded protein [GO:0034620]; endoplasmic reticulum unfolded protein response [GO:0030968]; growth hormone receptor signaling pathway via JAK-STAT [GO:0060397]; insulin receptor recycling [GO:0038020]; insulin receptor signaling pathway [GO:0008286]; IRE1-mediated unfolded protein response [GO:0036498]; negative regulation of end…	cadherin binding [GO:0045296]; enzyme binding [GO:0019899]; ephrin receptor binding [GO:0046875]; insulin receptor binding [GO:0005158]; non-membrane spanning protein tyrosine phosphatase activity [GO:0004726]; protein kinase binding [GO:0019901]; protein phosphatase 2A binding [GO:0051721]; protein tyrosine phosphatase activity [GO:0004725]; receptor tyrosine kinase binding [GO:0030971]; RNA bin…	Recovered	cluster 2	0	-0.899427	-0.173644	-0.200559		cluster 4	0	-2.03057	-2.77254	-1.92346														cluster 3	0	-1.13114	-2.59889	-1.7229
P20810	CAST	Calpastatin (Calpain inhibitor) (Sperm BS-17 component)	cytoplasm [GO:0005737]; cytosol [GO:0005829]; endoplasmic reticulum [GO:0005783]; membrane [GO:0016020]	inhibition of cysteine-type endopeptidase activity [GO:0097340]; negative regulation of type B pancreatic cell apoptotic process [GO:2000675]; presynaptic active zone organization [GO:1990709]	cadherin binding [GO:0045296]; calcium-dependent cysteine-type endopeptidase inhibitor activity [GO:0010859]; endopeptidase inhibitor activity [GO:0004866]; RNA binding [GO:0003723]	Recovered	cluster 2	0	-0.884759	-0.42222	-0.31263		cluster 4	0	-2.33777	-3.30973	-1.00011														cluster 3	0	-1.45301	-2.88751	-0.687482
P23193	TCEA1	Transcription elongation factor A protein 1 (Transcription elongation factor S-II protein 1) (Transcription elongation factor TFIIS.o)	nucleolus [GO:0005730]; nucleoplasm [GO:0005654]; nucleus [GO:0005634]; transcription factor TFIID complex [GO:0005669]	DNA-templated transcription [GO:0006351]; positive regulation of transcription by RNA polymerase II [GO:0045944]; transcription by RNA polymerase II [GO:0006366]; transcription elongation by RNA polymerase II [GO:0006368]	DNA binding [GO:0003677]; zinc ion binding [GO:0008270]	Recovered	cluster 2	0	-0.547266	-0.316195	-3.16688e-05
P23526	AHCY	Adenosylhomocysteinase (AdoHcyase) (EC 3.13.2.1) (S-adenosyl-L-homocysteine hydrolase)	cytosol [GO:0005829]; endoplasmic reticulum [GO:0005783]; extracellular exosome [GO:0070062]; melanosome [GO:0042470]; nucleus [GO:0005634]	one-carbon metabolic process [GO:0006730]; S-adenosylmethionine cycle [GO:0033353]	adenosylhomocysteinase activity [GO:0004013]	Recovered	cluster 2	0	-0.696851	-0.211245	-0.0337425		cluster 2	0	-1.06878	-1.14382	-1.1346								cluster 1	0	0.683397	1.42574	1.14307	Decrease	cluster 1	0	-0.371929	-0.932571	-1.10085
P23919	DTYMK	Thymidylate kinase (EC 2.7.4.9) (dTMP kinase)	cytoplasm [GO:0005737]; cytosol [GO:0005829]; mitochondrial matrix [GO:0005759]; mitochondrion [GO:0005739]; nucleus [GO:0005634]	cellular response to growth factor stimulus [GO:0071363]; dTDP biosynthetic process [GO:0006233]; dTTP biosynthetic process [GO:0006235]; dUDP biosynthetic process [GO:0006227]; myoblast differentiation [GO:0045445]; phosphorylation [GO:0016310]; response to cadmium ion [GO:0046686]; response to estrogen [GO:0043627]; thymidine biosynthetic process [GO:0046105]	ATP binding [GO:0005524]; nucleoside diphosphate kinase activity [GO:0004550]; thymidylate kinase activity [GO:0004798]	Recovered	cluster 2	0	-1.49401	-1.06509	-0.389988																			Decrease	cluster 1	0	0.867223	-0.783207	-1.08089
P25786	PSMA1	Proteasome subunit alpha type-1 (30 kDa prosomal protein) (PROS-30) (Macropain subunit C2) (Multicatalytic endopeptidase complex subunit C2) (Proteasome component C2) (Proteasome nu chain)	centrosome [GO:0005813]; cytoplasm [GO:0005737]; cytosol [GO:0005829]; extracellular exosome [GO:0070062]; nucleoplasm [GO:0005654]; nucleus [GO:0005634]; proteasome complex [GO:0000502]; proteasome core complex [GO:0005839]; proteasome core complex, alpha-subunit complex [GO:0019773]	immune system process [GO:0002376]; negative regulation of inflammatory response to antigenic stimulus [GO:0002862]; proteasome-mediated ubiquitin-dependent protein catabolic process [GO:0043161]	lipopolysaccharide binding [GO:0001530]	Recovered	cluster 2	0	-1.69792	-0.765834	-0.269312		cluster 2	0	-1.34764	-1.4624	-1.2012													Decrease	cluster 1	0	0.350279	-0.696566	-0.931892
P26639	TARS1	Threonine--tRNA ligase 1, cytoplasmic (EC 6.1.1.3) (Threonyl-tRNA synthetase) (ThrRS) (Threonyl-tRNA synthetase 1)	cytosol [GO:0005829]; extracellular exosome [GO:0070062]	threonyl-tRNA aminoacylation [GO:0006435]	ATP binding [GO:0005524]; identical protein binding [GO:0042802]; threonine-tRNA ligase activity [GO:0004829]; tRNA binding [GO:0000049]; zinc ion binding [GO:0008270]	Recovered	cluster 2	0	-0.775543	-0.203864	-0.125033																				cluster 3	0	-1.49537	-2.90079	-1.8173
P27105	STOM	Stomatin (Erythrocyte band 7 integral membrane protein) (Erythrocyte membrane protein band 7.2) (Protein 7.2b)	azurophil granule membrane [GO:0035577]; blood microparticle [GO:0072562]; cytoskeleton [GO:0005856]; endoplasmic reticulum [GO:0005783]; extracellular exosome [GO:0070062]; extracellular space [GO:0005615]; melanosome [GO:0042470]; membrane [GO:0016020]; membrane raft [GO:0045121]; mitochondrion [GO:0005739]; perinuclear region of cytoplasm [GO:0048471]; plasma membrane [GO:0005886]; specific gr…	positive regulation by host of viral genome replication [GO:0044829]; positive regulation of protein targeting to membrane [GO:0090314]; positive regulation of viral process [GO:0048524]; regulation of monoatomic ion transmembrane transport [GO:0034765]	identical protein binding [GO:0042802]; ion channel inhibitor activity [GO:0008200]; protein homodimerization activity [GO:0042803]; RNA polymerase binding [GO:0070063]	Recovered	cluster 2	0	-2.58968	-1.14678	-0.697577		cluster 4	0	-1.92411	-2.53072	-1.4484		cluster 10	0	-0.96586	-1.40738	-0.286695		cluster 4	0	-1.62382	0.260603	-0.410882		cluster 5	0	0.665562	-1.38394	-0.750823
P27816	MAP4	Microtubule-associated protein 4 (MAP-4)	axon [GO:0030424]; axoneme [GO:0005930]; cytosol [GO:0005829]; microtubule [GO:0005874]; microtubule associated complex [GO:0005875]; microtubule cytoskeleton [GO:0015630]; microtubule organizing center [GO:0005815]; mitotic spindle [GO:0072686]; neuron projection [GO:0043005]; plasma membrane [GO:0005886]	cell division [GO:0051301]; cilium disassembly [GO:0061523]; establishment of spindle orientation [GO:0051294]; microtubule cytoskeleton organization [GO:0000226]; microtubule polymerization [GO:0046785]; microtubule sliding [GO:0051012]; mitotic spindle organization [GO:0007052]; negative regulation of non-motile cilium assembly [GO:1902856]; neuron projection development [GO:0031175]	microtubule binding [GO:0008017]; microtubule stabilizing activity [GO:0140778]; RNA binding [GO:0003723]; structural molecule activity [GO:0005198]	Recovered	cluster 2	0	-0.67917	-0.0700904	0.0669493		cluster 4	0	-1.42258	-1.75877	-1.04178		cluster 6	0	-0.661344	-1.47366	-0.840277		cluster 2	0	-0.0178266	1.40357	0.907226		cluster 3	0	-0.743414	-1.68868	-1.10873
P28288	ABCD3	ATP-binding cassette sub-family D member 3 (EC 3.1.2.-) (EC 7.6.2.-) (70 kDa peroxisomal membrane protein) (PMP70)	cytosol [GO:0005829]; intracellular membrane-bounded organelle [GO:0043231]; membrane [GO:0016020]; mitochondrion [GO:0005739]; peroxisomal matrix [GO:0005782]; peroxisomal membrane [GO:0005778]; peroxisome [GO:0005777]	bile acid and bile salt transport [GO:0015721]; bile acid biosynthetic process [GO:0006699]; fatty acid beta-oxidation [GO:0006635]; fatty acid biosynthetic process [GO:0006633]; long-chain fatty acid import into peroxisome [GO:0015910]; peroxisome organization [GO:0007031]; phytanic acid metabolic process [GO:1903512]; response to organic cyclic compound [GO:0014070]; response to xenobiotic stim…	ABC-type transporter activity [GO:0140359]; ATP binding [GO:0005524]; ATP hydrolysis activity [GO:0016887]; ATPase-coupled transmembrane transporter activity [GO:0042626]; fatty acyl-CoA hydrolase activity [GO:0047617]; long-chain fatty acid transporter activity [GO:0005324]; protein homodimerization activity [GO:0042803]; protein self-association [GO:0043621]	Recovered	cluster 2	0	-0.625773	-0.105336	-0.130909														cluster 2	0	1.48774	3.10986	0.922689		cluster 2	0	-2.30254	-1.1483	-1.4693
P29401	TKT	Transketolase (TK) (EC 2.2.1.1)	cytosol [GO:0005829]; endoplasmic reticulum membrane [GO:0005789]; extracellular exosome [GO:0070062]; nuclear body [GO:0016604]; nucleoplasm [GO:0005654]; peroxisome [GO:0005777]; vesicle [GO:0031982]	glyceraldehyde-3-phosphate biosynthetic process [GO:0046166]; pentose-phosphate shunt [GO:0006098]; pentose-phosphate shunt, non-oxidative branch [GO:0009052]; regulation of growth [GO:0040008]; xylulose 5-phosphate biosynthetic process [GO:1901159]	calcium ion binding [GO:0005509]; magnesium ion binding [GO:0000287]; protein homodimerization activity [GO:0042803]; thiamine pyrophosphate binding [GO:0030976]; transketolase activity [GO:0004802]	Recovered	cluster 2	0	-0.735026	-0.13262	0.195879		cluster 2	0	-1.23179	-1.29673	-0.998634		cluster 10	0	-0.64733	-1.55896	-0.418194		cluster 2	0	-0.0876958	1.42634	0.614072		cluster 3	0	-0.496761	-1.16411	-1.19451
P30419	NMT1	Glycylpeptide N-tetradecanoyltransferase 1 (EC 2.3.1.97) (Myristoyl-CoA:protein N-myristoyltransferase 1) (HsNMT1) (NMT 1) (Type I N-myristoyltransferase) (Peptide N-myristoyltransferase 1) (Protein-lysine myristoyltransferase NMT1) (EC 2.3.1.-)	cytoplasm [GO:0005737]; cytosol [GO:0005829]; plasma membrane [GO:0005886]	cellular ketone metabolic process [GO:0042180]; in utero embryonic development [GO:0001701]; N-terminal peptidyl-glycine N-myristoylation [GO:0018008]; protein localization to membrane [GO:0072657]; regulation of rhodopsin mediated signaling pathway [GO:0022400]	glycylpeptide N-tetradecanoyltransferase activity [GO:0004379]; myristoyltransferase activity [GO:0019107]; peptidyl-lysine N6-myristoyltransferase activity [GO:0018030]	Recovered	cluster 2	0	-1.24278	-0.761002	-0.339952		cluster 4	0	-3.90163	-3.79966	-2.31453														cluster 3	0	-2.65885	-3.03866	-1.97458
P30519	HMOX2	Heme oxygenase 2 (HO-2) (EC 1.14.14.18) [Cleaved into: Heme oxygenase 2 soluble form]	endoplasmic reticulum membrane [GO:0005789]; membrane [GO:0016020]; plasma membrane [GO:0005886]; specific granule membrane [GO:0035579]	heme catabolic process [GO:0042167]; heme oxidation [GO:0006788]; response to hypoxia [GO:0001666]; response to oxidative stress [GO:0006979]	heme binding [GO:0020037]; heme oxygenase (decyclizing) activity [GO:0004392]; metal ion binding [GO:0046872]	Recovered	cluster 2	0	-1.05243	-0.180457	0.386311		cluster 2	0	-4.5064	-4.77529	-4.29816														cluster 3	0	-3.45397	-4.59483	-4.68447
P30566	ADSL	Adenylosuccinate lyase (ADSL) (ASL) (EC 4.3.2.2) (Adenylosuccinase) (ASase)	cytosol [GO:0005829]; protein-containing complex [GO:0032991]	'de novo' AMP biosynthetic process [GO:0044208]; 'de novo' IMP biosynthetic process [GO:0006189]; 'de novo' XMP biosynthetic process [GO:0097294]; aerobic respiration [GO:0009060]; AMP biosynthetic process [GO:0006167]; AMP salvage [GO:0044209]; GMP biosynthetic process [GO:0006177]; purine nucleotide biosynthetic process [GO:0006164]; response to hypoxia [GO:0001666]; response to muscle activity…	(S)-2-(5-amino-1-(5-phospho-D-ribosyl)imidazole-4-carboxamido) succinate lyase (fumarate-forming) activity [GO:0070626]; identical protein binding [GO:0042802]; N6-(1,2-dicarboxyethyl)AMP AMP-lyase (fumarate-forming) activity [GO:0004018]	Recovered	cluster 2	0	-1.59847	-0.337514	-0.244119		cluster 2	0	-1.6109	-1.3927	-1.43407													Decrease	cluster 1	0	-0.012438	-1.05519	-1.18995
P31939	ATIC	Bifunctional purine biosynthesis protein ATIC (AICAR transformylase/inosine monophosphate cyclohydrolase) (ATIC) [Cleaved into: Bifunctional purine biosynthesis protein ATIC, N-terminally processed] [Includes: Phosphoribosylaminoimidazolecarboxamide formyltransferase (EC 2.1.2.3) (5-aminoimidazole-4-carboxamide ribonucleotide formyltransferase) (AICAR formyltransferase) (AICAR transformylase); In…	cytosol [GO:0005829]; extracellular exosome [GO:0070062]; membrane [GO:0016020]; plasma membrane [GO:0005886]	'de novo' AMP biosynthetic process [GO:0044208]; 'de novo' IMP biosynthetic process [GO:0006189]; 'de novo' XMP biosynthetic process [GO:0097294]; animal organ regeneration [GO:0031100]; brainstem development [GO:0003360]; cellular response to interleukin-7 [GO:0098761]; cerebellum development [GO:0021549]; cerebral cortex development [GO:0021987]; dihydrofolate metabolic process [GO:0046452]; GM…	cadherin binding [GO:0045296]; IMP cyclohydrolase activity [GO:0003937]; phosphoribosylaminoimidazolecarboxamide formyltransferase activity [GO:0004643]; protein homodimerization activity [GO:0042803]	Recovered	cluster 2	0	-1.09172	-0.181393	-0.162097		cluster 4	0	-1.53049	-2.71494	-1.43748														cluster 3	0	-0.438771	-2.53355	-1.27538
P31943	HNRNPH1	Heterogeneous nuclear ribonucleoprotein H (hnRNP H) [Cleaved into: Heterogeneous nuclear ribonucleoprotein H, N-terminally processed]	catalytic step 2 spliceosome [GO:0071013]; cytosol [GO:0005829]; membrane [GO:0016020]; nucleoplasm [GO:0005654]; nucleus [GO:0005634]; ribonucleoprotein complex [GO:1990904]	mRNA splicing, via spliceosome [GO:0000398]; regulation of RNA splicing [GO:0043484]; RNA processing [GO:0006396]	identical protein binding [GO:0042802]; poly(U) RNA binding [GO:0008266]; RNA binding [GO:0003723]	Recovered	cluster 2	0	-1.512	-0.265055	-0.120245																			Decrease	cluster 1	0	-0.850534	-0.651218	-1.17866
P31948	STIP1	Stress-induced-phosphoprotein 1 (STI1) (Hsc70/Hsp90-organizing protein) (Hop) (Renal carcinoma antigen NY-REN-11) (Transformation-sensitive protein IEF SSP 3521)	cytosol [GO:0005829]; dynein axonemal particle [GO:0120293]; Golgi apparatus [GO:0005794]; nucleus [GO:0005634]; protein folding chaperone complex [GO:0101031]; protein-containing complex [GO:0032991]	cellular response to interleukin-7 [GO:0098761]	Hsp90 protein binding [GO:0051879]; RNA binding [GO:0003723]	Recovered	cluster 2	0	-0.602498	-0.160928	-0.195537		cluster 4	0	-1.1891	-2.16903	-1.10533														cluster 3	0	-0.586603	-2.0081	-0.909792
P31949	S100A11	Protein S100-A11 (Calgizzarin) (Metastatic lymph node gene 70 protein) (MLN 70) (Protein S100-C) (S100 calcium-binding protein A11) [Cleaved into: Protein S100-A11, N-terminally processed]	adherens junction [GO:0005912]; cytoplasm [GO:0005737]; extracellular exosome [GO:0070062]; extracellular region [GO:0005576]; extracellular space [GO:0005615]; nucleus [GO:0005634]; ruffle [GO:0001726]; secretory granule lumen [GO:0034774]	negative regulation of cell population proliferation [GO:0008285]; negative regulation of DNA replication [GO:0008156]; positive regulation of smooth muscle cell migration [GO:0014911]; signal transduction [GO:0007165]	cadherin binding involved in cell-cell adhesion [GO:0098641]; calcium ion binding [GO:0005509]; calcium-dependent protein binding [GO:0048306]; protein homodimerization activity [GO:0042803]; S100 protein binding [GO:0044548]	Recovered	cluster 2	0	-0.756766	-0.627322	-0.121103		cluster 2	0	-1.31939	-1.30008	-1.08719								cluster 9	0	-0.561681	-1.04453	-0.331258	Decrease	cluster 1	0	-0.562619	-0.672759	-0.966086
P32019	INPP5B	Type II inositol 1,4,5-trisphosphate 5-phosphatase (EC 3.1.3.36) (75 kDa inositol polyphosphate-5-phosphatase) (Phosphoinositide 5-phosphatase) (5PTase)	cytosol [GO:0005829]; early endosome membrane [GO:0031901]; endoplasmic reticulum-Golgi intermediate compartment [GO:0005793]; Golgi apparatus [GO:0005794]; membrane [GO:0016020]; phagocytic vesicle membrane [GO:0030670]; plasma membrane [GO:0005886]	flagellated sperm motility [GO:0030317]; in utero embryonic development [GO:0001701]; inositol phosphate metabolic process [GO:0043647]; phosphatidylinositol dephosphorylation [GO:0046856]; regulation of protein processing [GO:0070613]; signal transduction [GO:0007165]; spermatogenesis [GO:0007283]	inositol-1,3,4,5-tetrakisphosphate 5-phosphatase activity [GO:0052659]; inositol-1,4,5-trisphosphate 5-phosphatase activity [GO:0052658]; metal ion binding [GO:0046872]; phosphatidylinositol-4,5-bisphosphate 5-phosphatase activity [GO:0004439]	Recovered	cluster 2	0	-1.01037	-0.474786	-0.39351		cluster 3	0	-1.74348	-1.62362	-1.93376													Decrease	cluster 1	0	-0.733113	-1.14883	-1.54025
P35241	RDX	Radixin	adherens junction [GO:0005912]; apical part of cell [GO:0045177]; apical plasma membrane [GO:0016324]; cell periphery [GO:0071944]; cell tip [GO:0051286]; cleavage furrow [GO:0032154]; cortical actin cytoskeleton [GO:0030864]; extracellular exosome [GO:0070062]; extracellular space [GO:0005615]; filopodium [GO:0030175]; focal adhesion [GO:0005925]; lamellipodium [GO:0030027]; microvillus [GO:0005…	apical protein localization [GO:0045176]; barbed-end actin filament capping [GO:0051016]; cellular response to platelet-derived growth factor stimulus [GO:0036120]; cellular response to thyroid hormone stimulus [GO:0097067]; establishment of endothelial barrier [GO:0061028]; establishment of protein localization to plasma membrane [GO:0061951]; negative regulation of adherens junction organizatio…	actin binding [GO:0003779]; ATPase binding [GO:0051117]; cadherin binding [GO:0045296]; cell adhesion molecule binding [GO:0050839]; protein kinase A binding [GO:0051018]; RNA binding [GO:0003723]	Recovered	cluster 2	0	-0.83641	-0.50192	-0.208304	Recovered	cluster 1	0	-2.82554	-1.57696	-1.6132														cluster 2	0	-1.98913	-1.07504	-1.4049
P35249	RFC4	Replication factor C subunit 4 (Activator 1 37 kDa subunit) (A1 37 kDa subunit) (Activator 1 subunit 4) (Replication factor C 37 kDa subunit) (RF-C 37 kDa subunit) (RFC37)	Ctf18 RFC-like complex [GO:0031390]; DNA replication factor C complex [GO:0005663]; Elg1 RFC-like complex [GO:0031391]; nucleoplasm [GO:0005654]; nucleus [GO:0005634]	DNA duplex unwinding [GO:0032508]; DNA repair [GO:0006281]; DNA strand elongation involved in DNA replication [GO:0006271]; DNA-templated DNA replication [GO:0006261]; positive regulation of DNA-directed DNA polymerase activity [GO:1900264]	ATP binding [GO:0005524]; ATP hydrolysis activity [GO:0016887]; DNA binding [GO:0003677]; DNA clamp loader activity [GO:0003689]	Recovered	cluster 2	0	-1.7346	-1.05428	-0.326681
P35658	NUP214	Nuclear pore complex protein Nup214 (214 kDa nucleoporin) (Nucleoporin Nup214) (Protein CAN)	cytoplasmic side of nuclear pore [GO:1990876]; cytosol [GO:0005829]; nuclear envelope [GO:0005635]; nuclear pore [GO:0005643]; nucleoplasm [GO:0005654]	mRNA export from nucleus [GO:0006406]; nucleocytoplasmic transport [GO:0006913]; protein export from nucleus [GO:0006611]; protein import into nucleus [GO:0006606]; regulation of cell cycle [GO:0051726]; regulation of nucleocytoplasmic transport [GO:0046822]; RNA export from nucleus [GO:0006405]	nuclear export signal receptor activity [GO:0005049]; nuclear localization sequence binding [GO:0008139]; structural constituent of nuclear pore [GO:0017056]	Recovered	cluster 2	0	-0.96244	-0.263495	-0.421209		cluster 2	0	-1.94502	-1.92451	-1.65992								cluster 2	0	-0.239293	1.38765	0.218178		cluster 3	0	-0.982583	-1.66101	-1.23871
P37198	NUP62	Nuclear pore glycoprotein p62 (62 kDa nucleoporin) (Nucleoporin Nup62)	centrosome [GO:0005813]; cytoplasm [GO:0005737]; Flemming body [GO:0090543]; mitotic spindle [GO:0072686]; nuclear envelope [GO:0005635]; nuclear membrane [GO:0031965]; nuclear pore [GO:0005643]; nuclear pore central transport channel [GO:0044613]; nucleoplasm [GO:0005654]; ribonucleoprotein complex [GO:1990904]; spindle pole [GO:0000922]	cell surface receptor signaling pathway [GO:0007166]; cellular senescence [GO:0090398]; centriole assembly [GO:0098534]; centrosome cycle [GO:0007098]; mitotic centrosome separation [GO:0007100]; mitotic metaphase chromosome alignment [GO:0007080]; mRNA transport [GO:0051028]; negative regulation of apoptotic process [GO:0043066]; negative regulation of cell population proliferation [GO:0008285];…	chromatin binding [GO:0003682]; Hsp70 protein binding [GO:0030544]; Hsp90 protein binding [GO:0051879]; phospholipid binding [GO:0005543]; PTB domain binding [GO:0051425]; SH2 domain binding [GO:0042169]; signaling receptor complex adaptor activity [GO:0030159]; structural constituent of nuclear pore [GO:0017056]; ubiquitin binding [GO:0043130]	Recovered	cluster 2	0	-0.274219	-0.114946	7.93893e-05
P38117	ETFB	Electron transfer flavoprotein subunit beta (Beta-ETF)	cytosol [GO:0005829]; electron transfer flavoprotein complex [GO:0045251]; mitochondrial matrix [GO:0005759]; mitochondrion [GO:0005739]	amino acid catabolic process [GO:0009063]; fatty acid beta-oxidation using acyl-CoA dehydrogenase [GO:0033539]; respiratory electron transport chain [GO:0022904]	electron transfer activity [GO:0009055]	Recovered	cluster 2	0	-0.82278	-0.0849676	0.306096		cluster 2	0	-0.811158	-0.930319	-0.810401	Decrease	cluster 1	0	-0.334312	-1.36867	-1.74154	Increase	cluster 3	0	-0.488469	1.2837	2.04763	Decrease	cluster 1	0	0.0116223	-0.845351	-1.1165
P38606	ATP6V1A	V-type proton ATPase catalytic subunit A (V-ATPase subunit A) (EC 7.1.2.2) (V-ATPase 69 kDa subunit) (Vacuolar ATPase isoform VA68) (Vacuolar proton pump subunit alpha)	apical plasma membrane [GO:0016324]; clathrin-coated vesicle membrane [GO:0030665]; cytosol [GO:0005829]; endosome membrane [GO:0010008]; extracellular exosome [GO:0070062]; extrinsic component of synaptic vesicle membrane [GO:0098850]; Golgi membrane [GO:0000139]; intracellular membrane-bounded organelle [GO:0043231]; lysosomal membrane [GO:0005765]; membrane [GO:0016020]; microvillus [GO:000590…	cellular response to increased oxygen levels [GO:0036295]; endosomal lumen acidification [GO:0048388]; Golgi lumen acidification [GO:0061795]; intracellular iron ion homeostasis [GO:0006879]; intracellular pH reduction [GO:0051452]; lysosomal lumen acidification [GO:0007042]; proton transmembrane transport [GO:1902600]; regulation of macroautophagy [GO:0016241]; synaptic vesicle lumen acidificati…	ATP binding [GO:0005524]; ATP hydrolysis activity [GO:0016887]; proton-transporting ATP synthase activity, rotational mechanism [GO:0046933]; proton-transporting ATPase activity, rotational mechanism [GO:0046961]	Recovered	cluster 2	0	-0.660234	-0.0636289	0.0378315		cluster 2	0	-1.4254	-1.35779	-1.24832		cluster 10	0	-0.73841	-1.35464	-0.369065		cluster 2	0	0.0781764	1.29101	0.406896		cluster 3	0	-0.765169	-1.29416	-1.28616
P39023	RPL3	Large ribosomal subunit protein uL3 (60S ribosomal protein L3) (HIV-1 TAR RNA-binding protein B) (TARBP-B)	cytoplasm [GO:0005737]; cytosol [GO:0005829]; cytosolic large ribosomal subunit [GO:0022625]; cytosolic ribosome [GO:0022626]; extracellular exosome [GO:0070062]; focal adhesion [GO:0005925]; nucleolus [GO:0005730]; nucleus [GO:0005634]; protein-containing complex [GO:0032991]	cellular response to interleukin-4 [GO:0071353]; cytoplasmic translation [GO:0002181]; translation [GO:0006412]	RNA binding [GO:0003723]; structural constituent of ribosome [GO:0003735]	Recovered	cluster 2	0	-1.01887	-0.889429	-0.292573		cluster 4	0	-2.57704	-4.68182	-2.4965														cluster 3	0	-1.55817	-3.79239	-2.20393
P39880	CUX1	Homeobox protein cut-like 1 (CCAAT displacement protein) (CDP) (CDP/Cux p200) (Homeobox protein cux-1) [Cleaved into: CDP/Cux p110]	chromatin [GO:0000785]; cytosol [GO:0005829]; Golgi apparatus [GO:0005794]; nucleoplasm [GO:0005654]; nucleus [GO:0005634]	negative regulation of transcription by RNA polymerase II [GO:0000122]; positive regulation of dendrite morphogenesis [GO:0050775]; regulation of transcription by RNA polymerase II [GO:0006357]	DNA-binding transcription factor activity, RNA polymerase II-specific [GO:0000981]; RNA polymerase II transcription regulatory region sequence-specific DNA binding [GO:0000977]; sequence-specific DNA binding [GO:0043565]; sequence-specific double-stranded DNA binding [GO:1990837]	Recovered	cluster 2	0	-0.833928	-0.392214	-0.278176
P40227	CCT6A	T-complex protein 1 subunit zeta (TCP-1-zeta) (Acute morphine dependence-related protein 2) (CCT-zeta-1) (Chaperonin containing T-complex polypeptide 1 subunit 6A) (HTR3) (Tcp20)	chaperonin-containing T-complex [GO:0005832]; cytoplasm [GO:0005737]; cytosol [GO:0005829]; extracellular exosome [GO:0070062]; microtubule [GO:0005874]	chaperone-mediated protein folding [GO:0061077]; positive regulation of establishment of protein localization to telomere [GO:1904851]; positive regulation of protein localization to Cajal body [GO:1904871]; positive regulation of telomerase RNA localization to Cajal body [GO:1904874]; positive regulation of telomere maintenance via telomerase [GO:0032212]; protein folding [GO:0006457]; protein s…	ATP binding [GO:0005524]; ATP hydrolysis activity [GO:0016887]; ATP-dependent protein folding chaperone [GO:0140662]; protein folding chaperone [GO:0044183]; RNA binding [GO:0003723]; unfolded protein binding [GO:0051082]; WD40-repeat domain binding [GO:0071987]	Recovered	cluster 2	0	-1.32422	-0.854175	-0.497246		cluster 2	0	-1.81657	-1.85119	-1.5738													Decrease	cluster 1	0	-0.492353	-0.997013	-1.07655
P40855	PEX19	Peroxisomal biogenesis factor 19 (33 kDa housekeeping protein) (Peroxin-19) (Peroxisomal farnesylated protein)	brush border membrane [GO:0031526]; cytoplasm [GO:0005737]; cytosol [GO:0005829]; membrane [GO:0016020]; nucleoplasm [GO:0005654]; nucleus [GO:0005634]; peroxisomal membrane [GO:0005778]; peroxisome [GO:0005777]; protein-containing complex [GO:0032991]	chaperone-mediated protein folding [GO:0061077]; establishment of protein localization to peroxisome [GO:0072663]; negative regulation of lipid binding [GO:1900131]; peroxisome fission [GO:0016559]; peroxisome membrane biogenesis [GO:0016557]; peroxisome organization [GO:0007031]; protein import into peroxisome membrane [GO:0045046]; protein stabilization [GO:0050821]; protein targeting to peroxi…	ATPase binding [GO:0051117]; peroxisome membrane class-1 targeting sequence binding [GO:0036105]; peroxisome membrane targeting sequence binding [GO:0033328]; protein carrier chaperone [GO:0140597]	Recovered	cluster 2	0	-0.973112	-0.128826	0.118662		cluster 2	0	-1.9256	-1.66881	-1.31196														cluster 3	0	-0.952488	-1.53998	-1.43063
P43487	RANBP1	Ran-specific GTPase-activating protein (Ran-binding protein 1) (RanBP1)	centrosome [GO:0005813]; cytoplasm [GO:0005737]; cytosol [GO:0005829]; nuclear envelope [GO:0005635]; nuclear pore [GO:0005643]; nucleus [GO:0005634]	NLS-bearing protein import into nucleus [GO:0006607]; positive regulation of mitotic centrosome separation [GO:0046604]; signal transduction [GO:0007165]	cadherin binding [GO:0045296]; GDP-dissociation inhibitor activity [GO:0005092]; GTPase activator activity [GO:0005096]; small GTPase binding [GO:0031267]	Recovered	cluster 2	0	-1.02745	-0.629813	-0.443582		cluster 2	0	-2.28035	-2.55681	-2.23344							Increase	cluster 3	0	-0.105128	0.0797117	0.663708		cluster 3	0	-1.2529	-1.927	-1.78986
P46013	MKI67	Proliferation marker protein Ki-67 (Antigen identified by monoclonal antibody Ki-67) (Antigen KI-67) (Antigen Ki67)	chromosome [GO:0005694]; membrane [GO:0016020]; nuclear body [GO:0016604]; nucleolus [GO:0005730]; nucleoplasm [GO:0005654]; nucleus [GO:0005634]	cell cycle [GO:0007049]; cell population proliferation [GO:0008283]; regulation of chromatin organization [GO:1902275]; regulation of chromosome segregation [GO:0051983]; regulation of mitotic nuclear division [GO:0007088]	ATP binding [GO:0005524]; DNA binding [GO:0003677]; RNA binding [GO:0003723]	Recovered	cluster 2	0	-0.853092	-0.454749	-0.332733		cluster 3	0	-2.63488	-3.21402	-2.9513								cluster 1	0	1.71764	1.88983	1.93567		cluster 3	0	-1.78178	-2.75927	-2.61856
P46019	PHKA2	Phosphorylase b kinase regulatory subunit alpha, liver isoform (Phosphorylase kinase alpha L subunit)	cytosol [GO:0005829]; phosphorylase kinase complex [GO:0005964]; plasma membrane [GO:0005886]	carbohydrate metabolic process [GO:0005975]; generation of precursor metabolites and energy [GO:0006091]; glycogen metabolic process [GO:0005977]; protein modification process [GO:0036211]	calmodulin binding [GO:0005516]; phosphorylase kinase activity [GO:0004689]	Recovered	cluster 2	0	-0.526351	-0.0467566	0.138818		cluster 4	0	-2.41148	-3.06732	-1.76959														cluster 3	0	-1.88513	-3.02056	-1.90841
P46060	RANGAP1	Ran GTPase-activating protein 1 (RanGAP1)	aggresome [GO:0016235]; axon cytoplasm [GO:1904115]; cytoplasm [GO:0005737]; cytoplasmic periphery of the nuclear pore complex [GO:1990723]; cytosol [GO:0005829]; dendrite [GO:0030425]; intracellular membrane-bounded organelle [GO:0043231]; kinetochore [GO:0000776]; mitotic spindle [GO:0072686]; nuclear envelope [GO:0005635]; nuclear membrane [GO:0031965]; nuclear pore [GO:0005643]; nuclear pore …	activation of GTPase activity [GO:0090630]; cellular response to vasopressin [GO:1904117]; negative regulation of protein export from nucleus [GO:0046826]; nuclear export [GO:0051168]; nucleocytoplasmic transport [GO:0006913]; protein sumoylation [GO:0016925]; response to axon injury [GO:0048678]; signal transduction [GO:0007165]	cadherin binding [GO:0045296]; GTPase activator activity [GO:0005096]; RNA binding [GO:0003723]; small GTPase binding [GO:0031267]; ubiquitin protein ligase binding [GO:0031625]	Recovered	cluster 2	0	-1.2112	-0.624601	-0.450968		cluster 4	0	-3.07416	-3.54188	-2.32717								cluster 10	0	0.280958	-0.0875278	-0.490495		cluster 3	0	-1.86296	-2.91728	-1.8762
P47756	CAPZB	F-actin-capping protein subunit beta (CapZ beta)	actin cytoskeleton [GO:0015629]; brush border [GO:0005903]; cortical cytoskeleton [GO:0030863]; cytoskeleton [GO:0005856]; cytosol [GO:0005829]; extracellular exosome [GO:0070062]; F-actin capping protein complex [GO:0008290]; hippocampal mossy fiber to CA3 synapse [GO:0098686]; lamellipodium [GO:0030027]; membrane [GO:0016020]; postsynaptic density [GO:0014069]; sarcomere [GO:0030017]; Schaffer …	actin polymerization or depolymerization [GO:0008154]; barbed-end actin filament capping [GO:0051016]; cell morphogenesis [GO:0000902]; cytoskeleton organization [GO:0007010]; lamellipodium assembly [GO:0030032]; negative regulation of filopodium assembly [GO:0051490]; regulation of cell morphogenesis [GO:0022604]; regulation of lamellipodium assembly [GO:0010591]	actin binding [GO:0003779]; actin filament binding [GO:0051015]; cadherin binding [GO:0045296]	Recovered	cluster 2	0	-0.687742	-0.23041	-0.119344		cluster 3	0	-1.31517	-1.37684	-1.56016													Decrease	cluster 1	0	-0.627428	-1.14643	-1.44081
P48634	PRRC2A	Protein PRRC2A (HLA-B-associated transcript 2) (Large proline-rich protein BAT2) (Proline-rich and coiled-coil-containing protein 2A) (Protein G2)	cytosol [GO:0005829]; extracellular exosome [GO:0070062]; membrane [GO:0016020]; nucleoplasm [GO:0005654]; plasma membrane [GO:0005886]	cell differentiation [GO:0030154]	RNA binding [GO:0003723]	Recovered	cluster 2	0	-1.77359	-1.43269	-0.750882																			Decrease	cluster 1	0	-1.13023	-1.92652	-2.48788
P48681	NES	Nestin	cytoplasm [GO:0005737]; intermediate filament [GO:0005882]; intermediate filament cytoskeleton [GO:0045111]	brain development [GO:0007420]; cell projection morphogenesis [GO:0048858]; central nervous system development [GO:0007417]; embryonic camera-type eye development [GO:0031076]; G2/M transition of mitotic cell cycle [GO:0000086]; negative regulation of catalytic activity [GO:0043086]; negative regulation of neuron apoptotic process [GO:0043524]; negative regulation of protein binding [GO:0032091];…	CCR5 chemokine receptor binding [GO:0031730]; intermediate filament binding [GO:0019215]	Recovered	cluster 2	0	-1.21556	-0.586606	-0.239753		cluster 4	0	-2.80258	-2.90875	-1.73504														cluster 3	0	-1.58702	-2.32214	-1.49528
P49023	PXN	Paxillin	cell cortex [GO:0005938]; cell-cell junction [GO:0005911]; cytosol [GO:0005829]; focal adhesion [GO:0005925]; lamellipodium [GO:0030027]; microtubule associated complex [GO:0005875]; plasma membrane [GO:0005886]; stress fiber [GO:0001725]	cell adhesion [GO:0007155]; cell migration [GO:0016477]; cellular response to reactive oxygen species [GO:0034614]; endothelial cell migration [GO:0043542]; growth hormone receptor signaling pathway [GO:0060396]; positive regulation of stress fiber assembly [GO:0051496]; signal complex assembly [GO:0007172]; signal transduction [GO:0007165]; substrate adhesion-dependent cell spreading [GO:0034446…	beta-catenin binding [GO:0008013]; metal ion binding [GO:0046872]; neuropilin binding [GO:0038191]; protein phosphatase binding [GO:0019903]; vinculin binding [GO:0017166]	Recovered	cluster 2	0	-1.31583	-0.283997	-0.170404																				cluster 3	0	-0.631174	-1.74282	-1.13093
P49189	ALDH9A1	4-trimethylaminobutyraldehyde dehydrogenase (TMABA-DH) (TMABALDH) (EC 1.2.1.47) (Aldehyde dehydrogenase E3 isozyme) (Aldehyde dehydrogenase family 9 member A1) (EC 1.2.1.3) (Formaldehyde dehydrogenase) (EC 1.2.1.46) (Gamma-aminobutyraldehyde dehydrogenase) (EC 1.2.1.19) (R-aminobutyraldehyde dehydrogenase) [Cleaved into: 4-trimethylaminobutyraldehyde dehydrogenase, N-terminally processed]	cytoplasm [GO:0005737]; cytosol [GO:0005829]; extracellular exosome [GO:0070062]	carnitine biosynthetic process [GO:0045329]; cellular aldehyde metabolic process [GO:0006081]; protein homotetramerization [GO:0051289]	1-pyrroline dehydrogenase activity [GO:0033737]; 4-trimethylammoniobutyraldehyde dehydrogenase activity [GO:0047105]; aldehyde dehydrogenase (NAD+) activity [GO:0004029]; aminobutyraldehyde dehydrogenase activity [GO:0019145]; betaine-aldehyde dehydrogenase activity [GO:0008802]; formaldehyde dehydrogenase activity [GO:0018467]; glyceraldehyde-3-phosphate dehydrogenase (NAD+) (non-phosphorylating…	Recovered	cluster 2	0	-1.44914	-0.717447	-0.658097		cluster 2	0	-0.799198	-0.775284	-0.636409														cluster 5	0	0.649944	-0.0578375	0.0216885
P49959	MRE11	Double-strand break repair protein MRE11 (EC 3.1.-.-) (Meiotic recombination 11 homolog 1) (MRE11 homolog 1) (Meiotic recombination 11 homolog A) (MRE11 homolog A)	BRCA1-C complex [GO:0070533]; chromosomal region [GO:0098687]; chromosome, telomeric region [GO:0000781]; cytoplasm [GO:0005737]; cytosol [GO:0005829]; Mre11 complex [GO:0030870]; nucleoplasm [GO:0005654]; nucleus [GO:0005634]; PML body [GO:0016605]; replication fork [GO:0005657]; site of double-strand break [GO:0035861]	cell population proliferation [GO:0008283]; DNA damage response [GO:0006974]; DNA double-strand break processing [GO:0000729]; DNA duplex unwinding [GO:0032508]; DNA recombination [GO:0006310]; DNA repair [GO:0006281]; DNA strand resection involved in replication fork processing [GO:0110025]; double-strand break repair [GO:0006302]; double-strand break repair via homologous recombination [GO:0000…	3'-5' exonuclease activity [GO:0008408]; 3'-5'-DNA exonuclease activity [GO:0008296]; cadherin binding [GO:0045296]; DNA endonuclease activity [GO:0004520]; double-stranded DNA binding [GO:0003690]; identical protein binding [GO:0042802]; manganese ion binding [GO:0030145]; nuclease activity [GO:0004518]; single-stranded DNA endodeoxyribonuclease activity [GO:0000014]	Recovered	cluster 2	0	-0.819147	-0.286625	-0.278143		cluster 2	0	-1.27707	-1.38723	-1.31629		cluster 10	0	-0.465044	-1.14566	-0.294614		cluster 2	0	-0.354102	0.859039	0.0164708		cluster 3	0	-0.457924	-1.10061	-1.03815
P50402	EMD	Emerin	cytoplasm [GO:0005737]; cytosol [GO:0005829]; endoplasmic reticulum [GO:0005783]; membrane [GO:0016020]; microtubule [GO:0005874]; nuclear envelope [GO:0005635]; nuclear inner membrane [GO:0005637]; nuclear membrane [GO:0031965]; nuclear outer membrane [GO:0005640]; nucleoplasm [GO:0005654]; spindle [GO:0005819]; TMEM240-body [GO:0160045]	cellular response to growth factor stimulus [GO:0071363]; muscle contraction [GO:0006936]; muscle organ development [GO:0007517]; negative regulation of canonical Wnt signaling pathway [GO:0090090]; negative regulation of fibroblast proliferation [GO:0048147]; nuclear membrane organization [GO:0071763]; positive regulation of protein export from nucleus [GO:0046827]; regulation of canonical Wnt s…	actin binding [GO:0003779]; beta-tubulin binding [GO:0048487]; cadherin binding [GO:0045296]	Recovered	cluster 2	0	-1.49365	-0.482658	-0.653549		cluster 3	0	-2.15529	-2.75094	-2.76072								cluster 7	0	-2.05334	-0.760686	-0.595132	Decrease	cluster 1	0	-0.661635	-2.26828	-2.10717
P50747	HLCS	Biotin--protein ligase (EC 6.3.4.-) (Biotin apo-protein ligase) [Includes: Biotin--[methylmalonyl-CoA-carboxytransferase] ligase (EC 6.3.4.9); Biotin--[propionyl-CoA-carboxylase [ATP-hydrolyzing]] ligase (EC 6.3.4.10) (Holocarboxylase synthetase) (HCS); Biotin--[methylcrotonoyl-CoA-carboxylase] ligase (EC 6.3.4.11); Biotin--[acetyl-CoA-carboxylase] ligase (EC 6.3.4.15)]	chromatin [GO:0000785]; cytoplasm [GO:0005737]; cytosol [GO:0005829]; mitochondrion [GO:0005739]; nuclear lamina [GO:0005652]; nuclear matrix [GO:0016363]	biotin metabolic process [GO:0006768]; post-translational protein modification [GO:0043687]; response to biotin [GO:0070781]	ATP binding [GO:0005524]; biotin binding [GO:0009374]; biotin-[acetyl-CoA-carboxylase] ligase activity [GO:0004077]; biotin-[methylcrotonoyl-CoA-carboxylase] ligase activity [GO:0004078]; biotin-[methylmalonyl-CoA-carboxytransferase] ligase activity [GO:0004079]; biotin-[propionyl-CoA-carboxylase (ATP-hydrolyzing)] ligase activity [GO:0004080]; biotin-protein ligase activity [GO:0018271]; enzyme …	Recovered	cluster 2	0	-1.32818	-0.679819	-0.622069																				cluster 3	0	-0.850166	-1.15425	-1.1399
P50748	KNTC1	Kinetochore-associated protein 1 (Rough deal homolog) (HsROD) (Rod) (hRod)	actin cytoskeleton [GO:0015629]; cytoplasm [GO:0005737]; cytosol [GO:0005829]; kinetochore microtubule [GO:0005828]; nucleus [GO:0005634]; plasma membrane [GO:0005886]; RZZ complex [GO:1990423]; spindle pole [GO:0000922]	cell division [GO:0051301]; mitotic sister chromatid segregation [GO:0000070]; mitotic spindle assembly checkpoint signaling [GO:0007094]; protein localization to kinetochore involved in kinetochore assembly [GO:1903394]; protein-containing complex assembly [GO:0065003]; regulation of attachment of spindle microtubules to kinetochore [GO:0051988]; regulation of exit from mitosis [GO:0007096]	small GTPase binding [GO:0031267]	Recovered	cluster 2	0	-4.35895	-0.835355	-0.513692
P51149	RAB7A	Ras-related protein Rab-7a (EC 3.6.5.2)	alveolar lamellar body [GO:0097208]; autophagosome membrane [GO:0000421]; cytosol [GO:0005829]; endosome membrane [GO:0010008]; extracellular exosome [GO:0070062]; Golgi apparatus [GO:0005794]; late endosome [GO:0005770]; late endosome membrane [GO:0031902]; lipid droplet [GO:0005811]; lysosomal membrane [GO:0005765]; lysosome [GO:0005764]; melanosome membrane [GO:0033162]; mitochondrial membrane…	autophagosome assembly [GO:0000045]; bone resorption [GO:0045453]; early endosome to late endosome transport [GO:0045022]; endocytosis [GO:0006897]; endosome to lysosome transport [GO:0008333]; endosome to plasma membrane protein transport [GO:0099638]; epidermal growth factor catabolic process [GO:0007174]; establishment of vesicle localization [GO:0051650]; intracellular transport [GO:0046907];…	G protein activity [GO:0003925]; GDP binding [GO:0019003]; GTP binding [GO:0005525]; GTPase activity [GO:0003924]; retromer complex binding [GO:1905394]; small GTPase binding [GO:0031267]	Recovered	cluster 2	0	-1.00223	-0.53359	-0.33176		cluster 2	0	-1.65872	-1.54688	-1.50748														cluster 3	0	-0.656484	-1.01329	-1.17572
P51159	RAB27A	Ras-related protein Rab-27A (Rab-27) (EC 3.6.5.2) (GTP-binding protein Ram)	apical plasma membrane [GO:0016324]; cytosol [GO:0005829]; dendrite [GO:0030425]; exocytic vesicle [GO:0070382]; extracellular exosome [GO:0070062]; extracellular region [GO:0005576]; Golgi apparatus [GO:0005794]; late endosome [GO:0005770]; lysosome [GO:0005764]; melanosome [GO:0042470]; melanosome membrane [GO:0033162]; multivesicular body membrane [GO:0032585]; photoreceptor outer segment [GO:…	antigen processing and presentation [GO:0019882]; blood coagulation [GO:0007596]; complement-dependent cytotoxicity [GO:0097278]; cytotoxic T cell degranulation [GO:0043316]; exocytosis [GO:0006887]; exosomal secretion [GO:1990182]; melanocyte differentiation [GO:0030318]; melanosome localization [GO:0032400]; melanosome transport [GO:0032402]; multivesicular body organization [GO:0036257]; multi…	G protein activity [GO:0003925]; GDP binding [GO:0019003]; GTP binding [GO:0005525]; GTPase activity [GO:0003924]; myosin V binding [GO:0031489]; protein domain specific binding [GO:0019904]	Recovered	cluster 2	0	-1.13663	-0.69726	-0.503255		cluster 3	0	-1.40388	-1.36297	-1.45028													Decrease	cluster 1	0	-0.267252	-0.665712	-0.947023
P51572	BCAP31	B-cell receptor-associated protein 31 (BCR-associated protein 31) (Bap31) (6C6-AG tumor-associated antigen) (Protein CDM) (p28)	clathrin-coated vesicle [GO:0030136]; cytosol [GO:0005829]; endoplasmic reticulum [GO:0005783]; endoplasmic reticulum membrane [GO:0005789]; endoplasmic reticulum-Golgi intermediate compartment membrane [GO:0033116]; Golgi cisterna membrane [GO:0032580]; Golgi membrane [GO:0000139]; lipid droplet [GO:0005811]; lumenal side of endoplasmic reticulum membrane [GO:0098553]; membrane [GO:0016020]; mit…	apoptotic process [GO:0006915]; calcium-mediated signaling using intracellular calcium source [GO:0035584]; endoplasmic reticulum to Golgi vesicle-mediated transport [GO:0006888]; intracellular protein transport [GO:0006886]; negative regulation of endoplasmic reticulum calcium ion concentration [GO:0032471]; positive regulation of cysteine-type endopeptidase activity involved in apoptotic proces…	MHC class I protein binding [GO:0042288]; protein-containing complex binding [GO:0044877]	Recovered	cluster 2	0	-0.67431	-0.370872	-0.152651		cluster 2	0	-1.83415	-1.96602	-1.74636								cluster 1	0	0.174013	0.955978	0.907262		cluster 3	0	-1.15984	-1.59515	-1.59371
P51610	HCFC1	Host cell factor 1 (HCF) (HCF-1) (C1 factor) (CFF) (VCAF) (VP16 accessory protein) [Cleaved into: HCF N-terminal chain 1; HCF N-terminal chain 2; HCF N-terminal chain 3; HCF N-terminal chain 4; HCF N-terminal chain 5; HCF N-terminal chain 6; HCF C-terminal chain 1; HCF C-terminal chain 2; HCF C-terminal chain 3; HCF C-terminal chain 4; HCF C-terminal chain 5; HCF C-terminal chain 6]	cytoplasm [GO:0005737]; histone acetyltransferase complex [GO:0000123]; histone methyltransferase complex [GO:0035097]; membrane [GO:0016020]; MLL1 complex [GO:0071339]; MLL1/2 complex [GO:0044665]; neuronal cell body [GO:0043025]; NSL complex [GO:0044545]; nucleoplasm [GO:0005654]; nucleus [GO:0005634]; protein-containing complex [GO:0032991]; Set1C/COMPASS complex [GO:0048188]	cell cycle [GO:0007049]; chromatin remodeling [GO:0006338]; negative regulation of transcription by RNA polymerase II [GO:0000122]; positive regulation of cell cycle [GO:0045787]; positive regulation of DNA-templated transcription [GO:0045893]; positive regulation of gene expression [GO:0010628]; positive regulation of transcription by RNA polymerase II [GO:0045944]; protein stabilization [GO:005…	cadherin binding [GO:0045296]; chromatin binding [GO:0003682]; DNA-binding transcription factor binding [GO:0140297]; identical protein binding [GO:0042802]; protein-macromolecule adaptor activity [GO:0030674]; transcription coactivator activity [GO:0003713]	Recovered	cluster 2	0	-0.672134	-0.310112	-0.0837299		cluster 2	0	-1.74804	-1.59164	-1.35967							Increase	cluster 3	0	0.242104	0.767206	1.3049		cluster 7	0	-1.0759	-1.28153	-1.27594
P51648	ALDH3A2	Aldehyde dehydrogenase family 3 member A2 (EC 1.2.1.3) (EC 1.2.1.94) (Aldehyde dehydrogenase 10) (Fatty aldehyde dehydrogenase) (Microsomal aldehyde dehydrogenase)	cytoplasm [GO:0005737]; cytosol [GO:0005829]; endoplasmic reticulum membrane [GO:0005789]; intracellular membrane-bounded organelle [GO:0043231]; peroxisomal membrane [GO:0005778]; peroxisome [GO:0005777]	cellular aldehyde metabolic process [GO:0006081]; central nervous system development [GO:0007417]; epidermis development [GO:0008544]; fatty acid metabolic process [GO:0006631]; hexadecanal metabolic process [GO:0046458]; peripheral nervous system development [GO:0007422]; phytol metabolic process [GO:0033306]; sesquiterpenoid metabolic process [GO:0006714]	3-chloroallyl aldehyde dehydrogenase activity [GO:0004028]; aldehyde dehydrogenase (NAD+) activity [GO:0004029]; glyceraldehyde-3-phosphate dehydrogenase (NAD+) (non-phosphorylating) activity [GO:0043878]; long-chain-alcohol oxidase activity [GO:0046577]; long-chain-aldehyde dehydrogenase activity [GO:0050061]; medium-chain-aldehyde dehydrogenase activity [GO:0052814]; protein homodimerization ac…	Recovered	cluster 2	0	-0.950275	-0.304577	-0.0921624																			Decrease	cluster 1	0	-1.06745	-2.28703	-4.49014
P52272	HNRNPM	Heterogeneous nuclear ribonucleoprotein M (hnRNP M)	catalytic step 2 spliceosome [GO:0071013]; collagen-containing extracellular matrix [GO:0062023]; extracellular exosome [GO:0070062]; membrane [GO:0016020]; nuclear matrix [GO:0016363]; nucleolus [GO:0005730]; nucleoplasm [GO:0005654]; nucleus [GO:0005634]; paraspeckles [GO:0042382]; spliceosomal complex [GO:0005681]; synapse [GO:0045202]	alternative mRNA splicing, via spliceosome [GO:0000380]; mRNA splicing, via spliceosome [GO:0000398]	mRNA binding [GO:0003729]; protein domain specific binding [GO:0019904]; RNA binding [GO:0003723]	Recovered	cluster 2	0	-0.810395	-0.073171	0.227818	Recovered	cluster 1	0	-1.17147	-0.699182	-0.660708		cluster 10	0	-0.825134	-0.982835	-0.55686	Increase	cluster 3	0	0.0147393	0.909664	0.784678	Decrease	cluster 1	0	-0.361071	-0.626011	-0.888527
P52594	AGFG1	Arf-GAP domain and FG repeat-containing protein 1 (HIV-1 Rev-binding protein) (Nucleoporin-like protein RIP) (Rev-interacting protein) (Rev/Rex activation domain-binding protein)	cytoplasm [GO:0005737]; cytoplasmic vesicle [GO:0031410]; cytosol [GO:0005829]; intracellular membrane-bounded organelle [GO:0043231]; membrane [GO:0016020]; nuclear pore [GO:0005643]	acrosome assembly [GO:0001675]; intermediate filament organization [GO:0045109]; mRNA export from nucleus [GO:0006406]; spermatid nucleus differentiation [GO:0007289]	DNA binding [GO:0003677]; GTPase activator activity [GO:0005096]; metal ion binding [GO:0046872]; RNA binding [GO:0003723]	Recovered	cluster 2	0	-0.598509	-0.289024	-0.265731		cluster 2	0	-1.33207	-1.24485	-1.22251		cluster 9	0	-0.195441	-0.172834	0.150644		cluster 4	0	-0.403068	-0.116189	-0.416375		cluster 3	0	-0.733559	-0.955822	-0.95678
P52597	HNRNPF	Heterogeneous nuclear ribonucleoprotein F (hnRNP F) (Nucleolin-like protein mcs94-1) [Cleaved into: Heterogeneous nuclear ribonucleoprotein F, N-terminally processed]	catalytic step 2 spliceosome [GO:0071013]; cytosol [GO:0005829]; membrane [GO:0016020]; nucleoplasm [GO:0005654]; nucleus [GO:0005634]; plasma membrane [GO:0005886]; ribonucleoprotein complex [GO:1990904]; synapse [GO:0045202]	mRNA splicing, via spliceosome [GO:0000398]; regulation of RNA splicing [GO:0043484]; RNA processing [GO:0006396]	RNA binding [GO:0003723]; single-stranded RNA binding [GO:0003727]	Recovered	cluster 2	0	-0.719731	-0.137228	-0.0328319		cluster 3	0	-1.47023	-1.68509	-1.64045							Increase	cluster 3	0	-0.293091	0.197005	0.49535	Decrease	cluster 1	0	-0.7505	-1.54787	-1.60762
P52789	HK2	Hexokinase-2 (EC 2.7.1.1) (Hexokinase type II) (HK II) (Hexokinase-B) (Muscle form hexokinase)	centrosome [GO:0005813]; cytosol [GO:0005829]; intracellular membrane-bounded organelle [GO:0043231]; membrane [GO:0016020]; mitochondrial outer membrane [GO:0005741]; mitochondrion [GO:0005739]; sarcoplasmic reticulum [GO:0016529]	apoptotic mitochondrial changes [GO:0008637]; canonical glycolysis [GO:0061621]; carbohydrate phosphorylation [GO:0046835]; cellular response to leukemia inhibitory factor [GO:1990830]; establishment of protein localization to mitochondrion [GO:0072655]; fructose 6-phosphate metabolic process [GO:0006002]; glucose 6-phosphate metabolic process [GO:0051156]; glucose metabolic process [GO:0006006];…	ATP binding [GO:0005524]; fructokinase activity [GO:0008865]; glucokinase activity [GO:0004340]; glucose binding [GO:0005536]; hexokinase activity [GO:0004396]	Recovered	cluster 2	0	-1.52282	-0.660032	-0.138533
P53999	SUB1	Activated RNA polymerase II transcriptional coactivator p15 (Positive cofactor 4) (PC4) (SUB1 homolog) (p14)	extracellular exosome [GO:0070062]; nucleolus [GO:0005730]; nucleoplasm [GO:0005654]; nucleus [GO:0005634]; transcription regulator complex [GO:0005667]	negative regulation of DNA duplex unwinding [GO:1905463]; negative regulation of DNA metabolic process [GO:0051053]; positive regulation of transcription initiation by RNA polymerase II [GO:0060261]; regulation of transcription by RNA polymerase II [GO:0006357]; RNA polymerase II promoter clearance [GO:0001111]	identical protein binding [GO:0042802]; RNA binding [GO:0003723]; RNA polymerase II cis-regulatory region sequence-specific DNA binding [GO:0000978]; single-stranded DNA binding [GO:0003697]; transcription coactivator activity [GO:0003713]	Recovered	cluster 2	0	-0.660978	-0.270674	-0.280624																				cluster 3	0	-1.4575	-2.33114	-1.01933
P54277	PMS1	PMS1 protein homolog 1 (DNA mismatch repair protein PMS1)	MutLalpha complex [GO:0032389]; nucleus [GO:0005634]	mismatch repair [GO:0006298]; response to xenobiotic stimulus [GO:0009410]	ATP binding [GO:0005524]; ATP hydrolysis activity [GO:0016887]; ATP-dependent DNA damage sensor activity [GO:0140664]; DNA binding [GO:0003677]; enzyme binding [GO:0019899]; mismatched DNA binding [GO:0030983]	Recovered	cluster 2	0	-0.911359	-0.4396	-0.0414623		cluster 2	0	-2.27769	-2.04922	-2.21469								cluster 2	0	-0.128606	1.52325	0.805184	Decrease	cluster 1	0	-1.36633	-1.60962	-2.17323
P55039	DRG2	Developmentally-regulated GTP-binding protein 2 (DRG-2) (Translation factor GTPase DRG2) (TRAFAC GTPase DRG2) (EC 3.6.5.-)	cytoplasm [GO:0005737]; cytosol [GO:0005829]; intracellular membrane-bounded organelle [GO:0043231]; membrane [GO:0016020]; nucleoplasm [GO:0005654]; nucleus [GO:0005634]	cytoplasmic translation [GO:0002181]; signal transduction [GO:0007165]	GTP binding [GO:0005525]; GTPase activity [GO:0003924]; metal ion binding [GO:0046872]; RNA binding [GO:0003723]	Recovered	cluster 2	0	-0.858574	-0.343154	-0.27427																				cluster 3	0	-0.784293	-1.53743	-1.36497
P55072	VCP	Transitional endoplasmic reticulum ATPase (TER ATPase) (EC 3.6.4.6) (15S Mg(2+)-ATPase p97 subunit) (Valosin-containing protein) (VCP)	ATPase complex [GO:1904949]; azurophil granule lumen [GO:0035578]; cytoplasm [GO:0005737]; cytoplasmic stress granule [GO:0010494]; cytosol [GO:0005829]; Derlin-1 retrotranslocation complex [GO:0036513]; endoplasmic reticulum [GO:0005783]; endoplasmic reticulum membrane [GO:0005789]; extracellular exosome [GO:0070062]; extracellular region [GO:0005576]; ficolin-1-rich granule lumen [GO:1904813]; …	activation of cysteine-type endopeptidase activity involved in apoptotic process [GO:0006919]; aggresome assembly [GO:0070842]; ATP metabolic process [GO:0046034]; autophagosome maturation [GO:0097352]; autophagy [GO:0006914]; cellular response to arsenite ion [GO:1903843]; cellular response to heat [GO:0034605]; cellular response to misfolded protein [GO:0071218]; DNA damage response [GO:0006974…	ADP binding [GO:0043531]; ATP binding [GO:0005524]; ATP hydrolysis activity [GO:0016887]; BAT3 complex binding [GO:1904288]; deubiquitinase activator activity [GO:0035800]; identical protein binding [GO:0042802]; K48-linked polyubiquitin modification-dependent protein binding [GO:0036435]; lipid binding [GO:0008289]; MHC class I protein binding [GO:0042288]; polyubiquitin modification-dependent p…	Recovered	cluster 2	0	-0.785235	-0.190069	-0.290174		cluster 2	0	-1.58281	-1.23459	-1.1913							Increase	cluster 3	0	-0.347626	0.395628	0.390408		cluster 3	0	-0.797573	-1.04452	-0.901125
P57678	GEMIN4	Gem-associated protein 4 (Gemin-4) (Component of gems 4) (p97)	Cajal body [GO:0015030]; cytoplasm [GO:0005737]; cytosol [GO:0005829]; extracellular exosome [GO:0070062]; Gemini of coiled bodies [GO:0097504]; membrane [GO:0016020]; nuclear body [GO:0016604]; nucleolus [GO:0005730]; nucleoplasm [GO:0005654]; small nuclear ribonucleoprotein complex [GO:0030532]; SMN complex [GO:0032797]; SMN-Sm protein complex [GO:0034719]	rRNA processing [GO:0006364]; spliceosomal snRNP assembly [GO:0000387]	ribonucleoprotein complex binding [GO:0043021]	Recovered	cluster 2	0	-0.50074	-0.235694	-0.0610749
P61204	ARF3	ADP-ribosylation factor 3	extracellular exosome [GO:0070062]; Golgi membrane [GO:0000139]; perinuclear region of cytoplasm [GO:0048471]; plasma membrane [GO:0005886]	intracellular protein transport [GO:0006886]; retrograde vesicle-mediated transport, Golgi to endoplasmic reticulum [GO:0006890]; vesicle-mediated transport [GO:0016192]	GTP binding [GO:0005525]; GTPase activity [GO:0003924]	Recovered	cluster 2	0	-1.68214	-1.11625	-0.56423		cluster 2	0	-1.89669	-2.11234	-1.70103								cluster 9	0	-1.65061	-1.72202	-1.13611	Decrease	cluster 1	0	-0.21455	-0.996088	-1.1368
P61289	PSME3	Proteasome activator complex subunit 3 (11S regulator complex subunit gamma) (REG-gamma) (Activator of multicatalytic protease subunit 3) (Ki nuclear autoantigen) (Proteasome activator 28 subunit gamma) (PA28g) (PA28gamma)	cytoplasm [GO:0005737]; cytosol [GO:0005829]; membrane [GO:0016020]; nucleoplasm [GO:0005654]; nucleus [GO:0005634]; proteasome activator complex [GO:0008537]; proteasome complex [GO:0000502]	apoptotic process [GO:0006915]; cell cycle [GO:0007049]; negative regulation of extrinsic apoptotic signaling pathway [GO:2001237]; regulation of G1/S transition of mitotic cell cycle [GO:2000045]; regulation of proteasomal protein catabolic process [GO:0061136]	endopeptidase activator activity [GO:0061133]; identical protein binding [GO:0042802]; MDM2/MDM4 family protein binding [GO:0097371]; p53 binding [GO:0002039]	Recovered	cluster 2	0	-1.03215	-0.332533	-0.187845		cluster 2	0	-2.13815	-2.20978	-1.92397		cluster 6	0	-0.85539	-1.63255	-0.941809		cluster 2	0	-0.176756	1.30001	0.753964		cluster 3	0	-1.106	-1.87725	-1.73612
P62316	SNRPD2	Small nuclear ribonucleoprotein Sm D2 (Sm-D2) (snRNP core protein D2)	catalytic step 2 spliceosome [GO:0071013]; cytosol [GO:0005829]; extracellular exosome [GO:0070062]; methylosome [GO:0034709]; nucleoplasm [GO:0005654]; nucleus [GO:0005634]; pICln-Sm protein complex [GO:0034715]; precatalytic spliceosome [GO:0071011]; small nuclear ribonucleoprotein complex [GO:0030532]; SMN-Sm protein complex [GO:0034719]; spliceosomal complex [GO:0005681]; U1 snRNP [GO:0005685…	7-methylguanosine cap hypermethylation [GO:0036261]; mRNA splicing, via spliceosome [GO:0000398]; RNA splicing [GO:0008380]; spliceosomal complex assembly [GO:0000245]; spliceosomal snRNP assembly [GO:0000387]; U2-type prespliceosome assembly [GO:1903241]	RNA binding [GO:0003723]	Recovered	cluster 2	0	-1.12094	-0.555642	-0.277508		cluster 2	0	-1.65571	-1.48276	-1.54498	Decrease	cluster 1	0	-1.07501	-1.44772	-1.42494	Increase	cluster 3	0	-0.0459312	0.892074	1.14743	Decrease	cluster 1	0	-0.534774	-0.927122	-1.26747
P62328	TMSB4X	Thymosin beta-4 (T beta-4) (Fx) [Cleaved into: Hemoregulatory peptide AcSDKP (Ac-Ser-Asp-Lys-Pro) (N-acetyl-SDKP) (AcSDKP) (Seraspenide)]	cytoplasm [GO:0005737]; cytoskeleton [GO:0005856]; cytosol [GO:0005829]; extracellular region [GO:0005576]; nucleus [GO:0005634]; platelet alpha granule lumen [GO:0031093]	actin filament organization [GO:0007015]; negative regulation of canonical NF-kappaB signal transduction [GO:0043124]; negative regulation of inflammatory response [GO:0050728]; positive regulation of ATP biosynthetic process [GO:2001171]; positive regulation of blood vessel endothelial cell migration [GO:0043536]; positive regulation of endothelial cell chemotaxis [GO:2001028]; positive regulati…	actin monomer binding [GO:0003785]; enzyme binding [GO:0019899]; protein sequestering activity [GO:0140311]; RNA binding [GO:0003723]	Recovered	cluster 2	0	-0.822958	-0.464014	-0.301218		cluster 10	0	-1.11856	-2.05006	-1.53847								cluster 4	0	-1.03502	0.111412	-0.510329	Decrease	cluster 1	0	-0.295598	-1.58605	-1.23725
P62495	ETF1	Eukaryotic peptide chain release factor subunit 1 (Eukaryotic release factor 1) (eRF1) (Protein Cl1) (TB3-1)	cytoplasm [GO:0005737]; cytosol [GO:0005829]; cytosolic ribosome [GO:0022626]; translation release factor complex [GO:0018444]	cytoplasmic translational termination [GO:0002184]; nuclear-transcribed mRNA catabolic process, nonsense-mediated decay [GO:0000184]; protein methylation [GO:0006479]; regulation of translational termination [GO:0006449]; translational termination [GO:0006415]	aminoacyl-tRNA hydrolase activity [GO:0004045]; ribosome binding [GO:0043022]; RNA binding [GO:0003723]; sequence-specific mRNA binding [GO:1990825]; translation release factor activity [GO:0003747]; translation release factor activity, codon specific [GO:0016149]; translation termination factor activity [GO:0008079]	Recovered	cluster 2	0	-0.699392	-0.23907	-0.165635		cluster 2	0	-1.18788	-1.11568	-1.05989							Decrease	cluster 6	0	-0.5308	-0.0222131	-1.1641		cluster 3	0	-0.488484	-0.876614	-0.894258
P63167	DYNLL1	Dynein light chain 1, cytoplasmic (8 kDa dynein light chain) (DLC8) (Dynein light chain LC8-type 1) (Protein inhibitor of neuronal nitric oxide synthase) (PIN)	axon cytoplasm [GO:1904115]; centrosome [GO:0005813]; ciliary tip [GO:0097542]; cilium [GO:0005929]; cytoplasm [GO:0005737]; cytoplasmic dynein complex [GO:0005868]; cytoskeleton [GO:0005856]; cytosol [GO:0005829]; dynein complex [GO:0030286]; ficolin-1-rich granule membrane [GO:0101003]; kinetochore [GO:0000776]; membrane [GO:0016020]; microtubule [GO:0005874]; mitochondrion [GO:0005739]; mitoti…	apoptotic process [GO:0006915]; intraciliary retrograde transport [GO:0035721]; motile cilium assembly [GO:0044458]; negative regulation of DNA strand resection involved in replication fork processing [GO:0110027]; negative regulation of nitric oxide biosynthetic process [GO:0045019]; negative regulation of phosphorylation [GO:0042326]; positive regulation of insulin secretion involved in cellula…	dynein intermediate chain binding [GO:0045505]; enzyme binding [GO:0019899]; enzyme inhibitor activity [GO:0004857]; identical protein binding [GO:0042802]; nitric-oxide synthase inhibitor activity [GO:0036487]; protein-containing complex binding [GO:0044877]; scaffold protein binding [GO:0097110]	Recovered	cluster 2	0	-1.36322	-0.570988	-0.160531
P63241	EIF5A	Eukaryotic translation initiation factor 5A-1 (eIF-5A-1) (eIF-5A1) (Eukaryotic initiation factor 5A isoform 1) (eIF-5A) (Rev-binding factor) (eIF-4D)	annulate lamellae [GO:0005642]; cytoplasm [GO:0005737]; cytosol [GO:0005829]; endoplasmic reticulum membrane [GO:0005789]; membrane [GO:0016020]; nuclear pore [GO:0005643]; nucleus [GO:0005634]	cellular response to virus [GO:0098586]; positive regulation of intrinsic apoptotic signaling pathway by p53 class mediator [GO:1902255]; positive regulation of transcription by RNA polymerase II [GO:0045944]; positive regulation of translational elongation [GO:0045901]; positive regulation of translational termination [GO:0045905]; translational elongation [GO:0006414]; tumor necrosis factor-med…	ribosome binding [GO:0043022]; RNA binding [GO:0003723]; translation elongation factor activity [GO:0003746]; U6 snRNA binding [GO:0017070]	Recovered	cluster 2	0	-0.84051	-0.291985	-0.0272434		cluster 3	0	-1.83168	-2.23982	-1.93866								cluster 2	0	-0.390261	1.57566	-0.380448		cluster 3	0	-0.991167	-1.94783	-1.91141
P78371	CCT2	T-complex protein 1 subunit beta (TCP-1-beta) (CCT-beta) (Chaperonin containing T-complex polypeptide 1 subunit 2)	azurophil granule lumen [GO:0035578]; cell body [GO:0044297]; chaperonin-containing T-complex [GO:0005832]; cytosol [GO:0005829]; extracellular exosome [GO:0070062]; extracellular region [GO:0005576]; microtubule [GO:0005874]; zona pellucida receptor complex [GO:0002199]	binding of sperm to zona pellucida [GO:0007339]; chaperone mediated protein folding independent of cofactor [GO:0051086]; chaperone-mediated protein complex assembly [GO:0051131]; chaperone-mediated protein folding [GO:0061077]; positive regulation of establishment of protein localization to telomere [GO:1904851]; positive regulation of protein localization to Cajal body [GO:1904871]; positive re…	ATP binding [GO:0005524]; ATP hydrolysis activity [GO:0016887]; ATP-dependent protein folding chaperone [GO:0140662]; protein folding chaperone [GO:0044183]; ubiquitin protein ligase binding [GO:0031625]; unfolded protein binding [GO:0051082]	Recovered	cluster 2	0	-1.28307	-0.815275	-0.382187		cluster 2	0	-2.5276	-2.60536	-2.40231														cluster 3	0	-1.24454	-1.79009	-2.02012
P99999	CYCS	Cytochrome c	apoptosome [GO:0043293]; cytosol [GO:0005829]; mitochondrial inner membrane [GO:0005743]; mitochondrial intermembrane space [GO:0005758]; mitochondrion [GO:0005739]; nucleus [GO:0005634]; respirasome [GO:0070469]	activation of cysteine-type endopeptidase activity involved in apoptotic process by cytochrome c [GO:0008635]; cellular respiration [GO:0045333]; intrinsic apoptotic signaling pathway [GO:0097193]; mitochondrial electron transport, cytochrome c to oxygen [GO:0006123]; mitochondrial electron transport, ubiquinol to cytochrome c [GO:0006122]	electron transfer activity [GO:0009055]; heme binding [GO:0020037]; metal ion binding [GO:0046872]	Recovered	cluster 2	0	-1.92186	-0.501169	-0.34997		cluster 2	0	-3.08429	-2.32395	-2.35809														cluster 3	0	-1.16242	-1.82278	-2.00812
Q00796	SORD	Sorbitol dehydrogenase (SDH) (EC 1.1.1.-) ((R,R)-butanediol dehydrogenase) (EC 1.1.1.4) (L-iditol 2-dehydrogenase) (EC 1.1.1.14) (Polyol dehydrogenase) (Ribitol dehydrogenase) (RDH) (EC 1.1.1.56) (Xylitol dehydrogenase) (XDH) (EC 1.1.1.9)	cytosol [GO:0005829]; extracellular exosome [GO:0070062]; extracellular space [GO:0005615]; membrane [GO:0016020]; mitochondrial membrane [GO:0031966]; motile cilium [GO:0031514]	flagellated sperm motility [GO:0030317]; fructose biosynthetic process [GO:0046370]; glucose metabolic process [GO:0006006]; glucuronate catabolic process to xylulose 5-phosphate [GO:0019640]; L-xylitol catabolic process [GO:0051160]; L-xylitol metabolic process [GO:0051164]; sorbitol catabolic process [GO:0006062]	(R,R)-butanediol dehydrogenase activity [GO:0000721]; carbohydrate binding [GO:0030246]; D-sorbitol dehydrogenase (acceptor) activity [GO:0047833]; D-xylulose reductase activity [GO:0046526]; identical protein binding [GO:0042802]; L-iditol 2-dehydrogenase activity [GO:0003939]; NAD binding [GO:0051287]; ribitol 2-dehydrogenase activity [GO:0050255]; zinc ion binding [GO:0008270]	Recovered	cluster 2	0	-1.40069	-0.749876	-0.0241814
Q01780	EXOSC10	Exosome complex component 10 (EC 3.1.13.-) (Autoantigen PM/Scl 2) (P100 polymyositis-scleroderma overlap syndrome-associated autoantigen) (Polymyositis/scleroderma autoantigen 100 kDa) (PM/Scl-100) (Polymyositis/scleroderma autoantigen 2)	cytoplasm [GO:0005737]; cytoplasmic exosome (RNase complex) [GO:0000177]; cytosol [GO:0005829]; euchromatin [GO:0000791]; exosome (RNase complex) [GO:0000178]; membrane [GO:0016020]; nuclear exosome (RNase complex) [GO:0000176]; nucleolar exosome (RNase complex) [GO:0101019]; nucleolus [GO:0005730]; nucleoplasm [GO:0005654]; nucleus [GO:0005634]; small-subunit processome [GO:0032040]	CUT catabolic process [GO:0071034]; DNA repair [GO:0006281]; exonucleolytic trimming to generate mature 3'-end of 5.8S rRNA from tricistronic rRNA transcript (SSU-rRNA, 5.8S rRNA, LSU-rRNA) [GO:0000467]; histone mRNA catabolic process [GO:0071044]; maturation of 5.8S rRNA [GO:0000460]; negative regulation of telomere maintenance via telomerase [GO:0032211]; nuclear mRNA surveillance [GO:0071028];…	3'-5'-RNA exonuclease activity [GO:0000175]; metal ion binding [GO:0046872]; nucleotide binding [GO:0000166]; RNA binding [GO:0003723]; RNA exonuclease activity [GO:0004532]; single-stranded RNA binding [GO:0003727]; telomerase RNA binding [GO:0070034]	Recovered	cluster 2	0	-0.70206	-0.0782502	-0.00940883																				cluster 2	0	-3.8834	-2.97408	-1.89489
Q02750	MAP2K1	Dual specificity mitogen-activated protein kinase kinase 1 (MAP kinase kinase 1) (MAPKK 1) (MKK1) (EC 2.7.12.2) (ERK activator kinase 1) (MAPK/ERK kinase 1) (MEK 1)	centrosome [GO:0005813]; cytosol [GO:0005829]; early endosome [GO:0005769]; endoplasmic reticulum [GO:0005783]; focal adhesion [GO:0005925]; Golgi apparatus [GO:0005794]; late endosome [GO:0005770]; mitochondrion [GO:0005739]; nucleus [GO:0005634]; plasma membrane [GO:0005886]	Bergmann glial cell differentiation [GO:0060020]; cell motility [GO:0048870]; cellular senescence [GO:0090398]; cerebellar cortex formation [GO:0021697]; chemotaxis [GO:0006935]; endodermal cell differentiation [GO:0035987]; epithelial cell proliferation involved in lung morphogenesis [GO:0060502]; ERBB2-ERBB3 signaling pathway [GO:0038133]; ERK1 and ERK2 cascade [GO:0070371]; face development [G…	ATP binding [GO:0005524]; MAP kinase kinase activity [GO:0004708]; MAP-kinase scaffold activity [GO:0005078]; protein kinase activator activity [GO:0030295]; protein kinase activity [GO:0004672]; protein serine kinase activity [GO:0106310]; protein serine/threonine kinase activator activity [GO:0043539]; protein serine/threonine kinase activity [GO:0004674]; protein serine/threonine/tyrosine kina…	Recovered	cluster 2	0	-2.50606	-1.63506	-0.748863
Q03112	MECOM	Histone-lysine N-methyltransferase MECOM (EC 2.1.1.367) (Ecotropic virus integration site 1 protein homolog) (EVI-1) (MDS1 and EVI1 complex locus protein) (Myelodysplasia syndrome 1 protein) (Myelodysplasia syndrome-associated protein 1)	cytosol [GO:0005829]; nuclear speck [GO:0016607]; nucleoplasm [GO:0005654]; nucleus [GO:0005634]	apoptotic process [GO:0006915]; hematopoietic stem cell proliferation [GO:0071425]; heterochromatin organization [GO:0070828]; methylation [GO:0032259]; negative regulation of DNA-templated transcription [GO:0045892]; negative regulation of JNK cascade [GO:0046329]; negative regulation of programmed cell death [GO:0043069]; positive regulation of DNA-templated transcription [GO:0045893]; regulati…	DNA binding [GO:0003677]; DNA-binding transcription activator activity, RNA polymerase II-specific [GO:0001228]; DNA-binding transcription factor activity [GO:0003700]; histone H3 methyltransferase activity [GO:0140938]; histone H3K9 methyltransferase activity [GO:0046974]; histone H3K9 monomethyltransferase activity [GO:0140948]; histone H3K9me2 methyltransferase activity [GO:0140947]; metal ion…	Recovered	cluster 2	0	-0.921654	-0.500348	-0.390178
Q04637	EIF4G1	Eukaryotic translation initiation factor 4 gamma 1 (eIF-4-gamma 1) (eIF-4G 1) (eIF-4G1) (p220)	cytoplasm [GO:0005737]; cytoplasmic stress granule [GO:0010494]; cytosol [GO:0005829]; eukaryotic translation initiation factor 4F complex [GO:0016281]; membrane [GO:0016020]; nucleus [GO:0005634]; postsynapse [GO:0098794]; ribosome [GO:0005840]	behavioral fear response [GO:0001662]; cap-dependent translational initiation [GO:0002191]; cellular response to nutrient levels [GO:0031669]; energy homeostasis [GO:0097009]; lung development [GO:0030324]; macromolecule biosynthetic process [GO:0009059]; miRNA-mediated gene silencing by inhibition of translation [GO:0035278]; negative regulation of autophagy [GO:0010507]; negative regulation of …	ATP binding [GO:0005524]; eukaryotic initiation factor 4E binding [GO:0008190]; identical protein binding [GO:0042802]; molecular adaptor activity [GO:0060090]; mRNA binding [GO:0003729]; RNA binding [GO:0003723]; translation factor activity, RNA binding [GO:0008135]; translation initiation factor activity [GO:0003743]; translation initiation factor binding [GO:0031369]	Recovered	cluster 2	0	-0.804957	-0.284079	-0.190972		cluster 2	0	-1.68	-1.56559	-1.50278		cluster 3	0	-1.01552	-1.01739	-0.792727		cluster 1	0	0.210566	0.733313	0.601755		cluster 3	0	-0.875041	-1.28151	-1.31181
Q05209	PTPN12	Tyrosine-protein phosphatase non-receptor type 12 (EC 3.1.3.48) (PTP-PEST) (Protein-tyrosine phosphatase G1) (PTPG1)	cell projection [GO:0042995]; cytoplasm [GO:0005737]; cytosol [GO:0005829]; focal adhesion [GO:0005925]; nucleoplasm [GO:0005654]; nucleus [GO:0005634]; podosome [GO:0002102]	cellular response to epidermal growth factor stimulus [GO:0071364]; negative regulation of ERBB signaling pathway [GO:1901185]; negative regulation of platelet-derived growth factor receptor-beta signaling pathway [GO:2000587]; peptidyl-tyrosine dephosphorylation [GO:0035335]; protein dephosphorylation [GO:0006470]; regulation of epidermal growth factor receptor signaling pathway [GO:0042058]; ti…	non-membrane spanning protein tyrosine phosphatase activity [GO:0004726]; phosphoprotein phosphatase activity [GO:0004721]; protein tyrosine phosphatase activity [GO:0004725]; SH3 domain binding [GO:0017124]	Recovered	cluster 2	0	-0.6952	-0.380093	-0.169506		cluster 2	0	-1.64103	-1.48475	-1.26038		cluster 7	0	-2.37231	-1.524	-2.09979		cluster 1	0	1.67711	1.14391	1.93028		cluster 7	0	-0.945833	-1.10465	-1.09087
Q06830	PRDX1	Peroxiredoxin-1 (EC 1.11.1.24) (Natural killer cell-enhancing factor A) (NKEF-A) (Proliferation-associated gene protein) (PAG) (Thioredoxin peroxidase 2) (Thioredoxin-dependent peroxide reductase 2) (Thioredoxin-dependent peroxiredoxin 1)	cytoplasm [GO:0005737]; cytosol [GO:0005829]; extracellular exosome [GO:0070062]; extracellular space [GO:0005615]; melanosome [GO:0042470]; nucleus [GO:0005634]	canonical NF-kappaB signal transduction [GO:0007249]; cell population proliferation [GO:0008283]; cell redox homeostasis [GO:0045454]; erythrocyte homeostasis [GO:0034101]; fibroblast proliferation [GO:0048144]; hydrogen peroxide catabolic process [GO:0042744]; leukocyte activation [GO:0045321]; natural killer cell activation [GO:0030101]; natural killer cell mediated cytotoxicity [GO:0042267]; r…	cadherin binding [GO:0045296]; identical protein binding [GO:0042802]; peroxidase activity [GO:0004601]; RNA binding [GO:0003723]; thioredoxin peroxidase activity [GO:0008379]	Recovered	cluster 2	0	-0.500459	-0.0418429	0.055998		cluster 2	0	-1.13752	-1.2527	-1.21553		cluster 8	0	0.0757288	-0.400314	-0.048426		cluster 7	0	-0.576188	0.358471	0.104424	Decrease	cluster 1	0	-0.637056	-1.21086	-1.27153
Q09666	AHNAK	Neuroblast differentiation-associated protein AHNAK (Desmoyokin)	actin cytoskeleton [GO:0015629]; cell-cell contact zone [GO:0044291]; costamere [GO:0043034]; cytoplasm [GO:0005737]; cytosol [GO:0005829]; extracellular exosome [GO:0070062]; focal adhesion [GO:0005925]; lysosomal membrane [GO:0005765]; membrane [GO:0016020]; nucleus [GO:0005634]; plasma membrane [GO:0005886]; plasma membrane protein complex [GO:0098797]; sarcolemma [GO:0042383]; T-tubule [GO:00…	positive regulation of plasma membrane repair [GO:1905686]; regulation of RNA splicing [GO:0043484]; regulation of voltage-gated calcium channel activity [GO:1901385]	cadherin binding [GO:0045296]; identical protein binding [GO:0042802]; RNA binding [GO:0003723]; S100 protein binding [GO:0044548]; structural molecule activity conferring elasticity [GO:0097493]	Recovered	cluster 2	0	-0.553675	-0.279574	-0.161187		cluster 4	0	-1.37741	-1.60717	-1.04473		cluster 9	0	-0.152324	-0.500869	0.550069	Decrease	cluster 6	0	-0.401351	0.221295	-0.711256		cluster 3	0	-0.823731	-1.32759	-0.883542
Q12769	NUP160	Nuclear pore complex protein Nup160 (160 kDa nucleoporin) (Nucleoporin Nup160)	cytosol [GO:0005829]; nuclear envelope [GO:0005635]; nuclear pore [GO:0005643]; nuclear pore outer ring [GO:0031080]	mRNA export from nucleus [GO:0006406]; nephron development [GO:0072006]; nucleocytoplasmic transport [GO:0006913]; protein transport [GO:0015031]	structural constituent of nuclear pore [GO:0017056]	Recovered	cluster 2	0	-0.995138	-0.22681	-0.233205		cluster 2	0	-1.89012	-1.95033	-1.93777							Decrease	cluster 6	0	-1.91441	-1.72375	-2.73149		cluster 3	0	-0.894978	-1.72352	-1.70457
Q12874	SF3A3	Splicing factor 3A subunit 3 (SF3a60) (Spliceosome-associated protein 61) (SAP 61)	catalytic step 2 spliceosome [GO:0071013]; nuclear speck [GO:0016607]; nucleoplasm [GO:0005654]; nucleus [GO:0005634]; spliceosomal complex [GO:0005681]; U2 snRNP [GO:0005686]; U2-type precatalytic spliceosome [GO:0071005]; U2-type spliceosomal complex [GO:0005684]	mRNA 3'-splice site recognition [GO:0000389]; mRNA processing [GO:0006397]; mRNA splicing, via spliceosome [GO:0000398]; RNA splicing, via transesterification reactions [GO:0000375]; U2-type prespliceosome assembly [GO:1903241]	RNA binding [GO:0003723]; zinc ion binding [GO:0008270]	Recovered	cluster 2	0	-1.35136	-0.942087	-0.341346
Q12965	MYO1E	Unconventional myosin-Ie (Myosin-Ic) (Unconventional myosin 1E)	actin cytoskeleton [GO:0015629]; adherens junction [GO:0005912]; brush border [GO:0005903]; clathrin-coated vesicle [GO:0030136]; cuticular plate [GO:0032437]; cytoplasm [GO:0005737]; cytoskeleton [GO:0005856]; extracellular exosome [GO:0070062]; microvillus [GO:0005902]; myosin complex [GO:0016459]; plasma membrane [GO:0005886]	actin filament organization [GO:0007015]; endocytosis [GO:0006897]; glomerular basement membrane development [GO:0032836]; glomerular filtration [GO:0003094]; glomerulus development [GO:0032835]; in utero embryonic development [GO:0001701]; platelet-derived growth factor receptor signaling pathway [GO:0048008]; podocyte development [GO:0072015]; post-embryonic hemopoiesis [GO:0035166]; vasculogen…	actin filament binding [GO:0051015]; ATP binding [GO:0005524]; ATP hydrolysis activity [GO:0016887]; calmodulin binding [GO:0005516]; microfilament motor activity [GO:0000146]; phosphatidylinositol binding [GO:0035091]	Recovered	cluster 2	0	-0.681472	-0.181827	-0.343197		cluster 3	0	-2.09847	-2.09005	-2.4917														cluster 3	0	-1.41699	-1.90823	-2.14851
Q13043	STK4	Serine/threonine-protein kinase 4 (EC 2.7.11.1) (Mammalian STE20-like protein kinase 1) (MST-1) (STE20-like kinase MST1) (Serine/threonine-protein kinase Krs-2) [Cleaved into: Serine/threonine-protein kinase 4 37kDa subunit (MST1/N); Serine/threonine-protein kinase 4 18kDa subunit (MST1/C)]	cytoplasm [GO:0005737]; cytosol [GO:0005829]; nuclear body [GO:0016604]; nucleoplasm [GO:0005654]; nucleus [GO:0005634]; protein-containing complex [GO:0032991]	apoptotic process [GO:0006915]; branching involved in blood vessel morphogenesis [GO:0001569]; canonical Wnt signaling pathway [GO:0060070]; cell differentiation involved in embryonic placenta development [GO:0060706]; cell morphogenesis [GO:0000902]; central nervous system development [GO:0007417]; endocardium development [GO:0003157]; epithelial cell proliferation [GO:0050673]; extrinsic apopto…	ATP binding [GO:0005524]; identical protein binding [GO:0042802]; magnesium ion binding [GO:0000287]; protein homodimerization activity [GO:0042803]; protein kinase activity [GO:0004672]; protein serine kinase activity [GO:0106310]; protein serine/threonine kinase activator activity [GO:0043539]; protein serine/threonine kinase activity [GO:0004674]; RNA polymerase II-specific DNA-binding transcr…	Recovered	cluster 2	0	-1.46611	-0.241466	-0.401801
Q13123	IK	Protein Red (Cytokine IK) (IK factor) (Protein RER)	chromosome [GO:0005694]; cytoplasm [GO:0005737]; nuclear speck [GO:0016607]; nucleoplasm [GO:0005654]; nucleus [GO:0005634]; spindle pole [GO:0000922]; U2-type precatalytic spliceosome [GO:0071005]	mitotic cell cycle [GO:0000278]; mitotic spindle assembly checkpoint signaling [GO:0007094]; mRNA splicing, via spliceosome [GO:0000398]; protein localization to kinetochore [GO:0034501]	identical protein binding [GO:0042802]	Recovered	cluster 2	0	-1.32857	-0.662338	-0.457198
Q13162	PRDX4	Peroxiredoxin-4 (EC 1.11.1.24) (Antioxidant enzyme AOE372) (AOE37-2) (Peroxiredoxin IV) (Prx-IV) (Thioredoxin peroxidase AO372) (Thioredoxin-dependent peroxide reductase A0372) (Thioredoxin-dependent peroxiredoxin 4)	cytosol [GO:0005829]; endoplasmic reticulum [GO:0005783]; extracellular exosome [GO:0070062]; extracellular region [GO:0005576]; ficolin-1-rich granule lumen [GO:1904813]; nucleus [GO:0005634]; secretory granule lumen [GO:0034774]	cell redox homeostasis [GO:0045454]; cellular response to stress [GO:0033554]; extracellular matrix organization [GO:0030198]; hydrogen peroxide catabolic process [GO:0042744]; I-kappaB phosphorylation [GO:0007252]; male gonad development [GO:0008584]; negative regulation of male germ cell proliferation [GO:2000255]; protein maturation by protein folding [GO:0022417]; response to oxidative stress…	identical protein binding [GO:0042802]; molecular adaptor activity [GO:0060090]; molecular sequestering activity [GO:0140313]; thioredoxin peroxidase activity [GO:0008379]	Recovered	cluster 2	0	-1.60409	-1.0668	-0.73989		cluster 2	0	-1.31954	-0.72727	-1.15497								cluster 7	0	-1.43801	0.0234206	0.262719		cluster 8	0	0.284546	0.339531	-0.415083
Q13263	TRIM28	Transcription intermediary factor 1-beta (TIF1-beta) (E3 SUMO-protein ligase TRIM28) (EC 2.3.2.27) (KRAB-associated protein 1) (KAP-1) (KRAB-interacting protein 1) (KRIP-1) (Nuclear corepressor KAP-1) (RING finger protein 96) (RING-type E3 ubiquitin transferase TIF1-beta) (Tripartite motif-containing protein 28)	euchromatin [GO:0000791]; heterochromatin [GO:0000792]; nucleoplasm [GO:0005654]; nucleus [GO:0005634]; protein-containing complex [GO:0032991]; RNA polymerase II transcription regulator complex [GO:0090575]	chromatin organization [GO:0006325]; convergent extension involved in axis elongation [GO:0060028]; DNA repair [GO:0006281]; embryo implantation [GO:0007566]; embryonic placenta morphogenesis [GO:0060669]; epithelial to mesenchymal transition [GO:0001837]; genomic imprinting [GO:0071514]; innate immune response [GO:0045087]; negative regulation of DNA demethylation [GO:1901536]; negative regulati…	chromatin binding [GO:0003682]; chromo shadow domain binding [GO:0070087]; DNA binding [GO:0003677]; Krueppel-associated box domain binding [GO:0035851]; promoter-specific chromatin binding [GO:1990841]; protein kinase activity [GO:0004672]; RNA binding [GO:0003723]; SUMO transferase activity [GO:0019789]; transcription coactivator activity [GO:0003713]; transcription corepressor activity [GO:000…	Recovered	cluster 2	0	-0.700302	-0.403913	-0.324766																			Decrease	cluster 1	0	-0.402012	-0.602057	-0.804609
Q13506	NAB1	NGFI-A-binding protein 1 (EGR-1-binding protein 1) (Transcriptional regulatory protein p54)	nucleoplasm [GO:0005654]; nucleus [GO:0005634]	endochondral ossification [GO:0001958]; myelination [GO:0042552]; negative regulation of DNA-templated transcription [GO:0045892]; regulation of DNA-templated transcription [GO:0006355]; regulation of epidermis development [GO:0045682]; Schwann cell differentiation [GO:0014037]	transcription coregulator activity [GO:0003712]	Recovered	cluster 2	0	-1.43736	-0.262636	-0.29507		cluster 2	0	-2.70074	-2.3388	-2.2409		cluster 3	0	-1.67184	-1.46365	-1.11436		cluster 2	0	0.234483	1.20101	0.819285		cluster 3	0	-1.26338	-2.07616	-1.94583
Q13561	DCTN2	Dynactin subunit 2 (50 kDa dynein-associated polypeptide) (Dynactin complex 50 kDa subunit) (DCTN-50) (p50 dynamitin)	centrosome [GO:0005813]; cytoplasm [GO:0005737]; cytosol [GO:0005829]; dynactin complex [GO:0005869]; dynein complex [GO:0030286]; extracellular exosome [GO:0070062]; growth cone [GO:0030426]; kinetochore [GO:0000776]; membrane [GO:0016020]; microtubule [GO:0005874]; vesicle [GO:0031982]	melanosome transport [GO:0032402]; mitotic metaphase chromosome alignment [GO:0007080]; mitotic spindle organization [GO:0007052]; protein localization to centrosome [GO:0071539]	identical protein binding [GO:0042802]; protein kinase binding [GO:0019901]; spectrin binding [GO:0030507]	Recovered	cluster 2	0	-1.18631	-0.462012	-0.526156		cluster 4	0	-2.06945	-2.9007	-1.63258														cluster 3	0	-0.883146	-2.43869	-1.10643
Q13823	GNL2	Nucleolar GTP-binding protein 2 (Autoantigen NGP-1)	membrane [GO:0016020]; nucleolus [GO:0005730]; nucleus [GO:0005634]	ribosome biogenesis [GO:0042254]	GTP binding [GO:0005525]; GTPase activity [GO:0003924]; RNA binding [GO:0003723]	Recovered	cluster 2	0	-1.28397	-0.314614	-0.571757
Q14004	CDK13	Cyclin-dependent kinase 13 (EC 2.7.11.22) (EC 2.7.11.23) (CDC2-related protein kinase 5) (Cell division cycle 2-like protein kinase 5) (Cell division protein kinase 13) (hCDK13) (Cholinesterase-related cell division controller)	cyclin K-CDK13 complex [GO:0002945]; cyclin/CDK positive transcription elongation factor complex [GO:0008024]; cytosol [GO:0005829]; extracellular region [GO:0005576]; extracellular space [GO:0005615]; ficolin-1-rich granule lumen [GO:1904813]; Golgi apparatus [GO:0005794]; nuclear cyclin-dependent protein kinase holoenzyme complex [GO:0019908]; nuclear speck [GO:0016607]; nucleoplasm [GO:0005654…	alternative mRNA splicing, via spliceosome [GO:0000380]; hemopoiesis [GO:0030097]; negative regulation of stem cell differentiation [GO:2000737]; phosphorylation [GO:0016310]; positive regulation of transcription by RNA polymerase II [GO:0045944]; positive regulation of transcription elongation by RNA polymerase II [GO:0032968]; regulation of signal transduction [GO:0009966]	ATP binding [GO:0005524]; cyclin binding [GO:0030332]; cyclin-dependent protein serine/threonine kinase activity [GO:0004693]; protein kinase activity [GO:0004672]; protein kinase binding [GO:0019901]; protein serine kinase activity [GO:0106310]; RNA binding [GO:0003723]; RNA polymerase II CTD heptapeptide repeat kinase activity [GO:0008353]	Recovered	cluster 2	0	-0.95129	-0.706826	-0.300045
Q14008	CKAP5	Cytoskeleton-associated protein 5 (Colonic and hepatic tumor overexpressed gene protein) (Ch-TOG)	centrosome [GO:0005813]; cytoplasm [GO:0005737]; cytosol [GO:0005829]; kinetochore [GO:0000776]; membrane [GO:0016020]; microtubule plus-end [GO:0035371]; nucleolus [GO:0005730]; plasma membrane [GO:0005886]; protein-containing complex [GO:0032991]; spindle pole [GO:0000922]	cell division [GO:0051301]; centrosome cycle [GO:0007098]; centrosome duplication [GO:0051298]; establishment or maintenance of microtubule cytoskeleton polarity [GO:0030951]; microtubule depolymerization [GO:0007019]; microtubule polymerization [GO:0046785]; mitotic spindle organization [GO:0007052]; positive regulation of microtubule nucleation [GO:0090063]; RNA transport [GO:0050658]; spindle …	cadherin binding [GO:0045296]; microtubule binding [GO:0008017]; microtubule plus end polymerase [GO:0061863]; microtubule plus-end binding [GO:0051010]; ribonucleoprotein complex binding [GO:0043021]	Recovered	cluster 2	0	-2.12667	-1.23278	-0.664089
Q14157	UBAP2L	Ubiquitin-associated protein 2-like (Protein NICE-4) (RNA polymerase II degradation factor UBAP2L)	chromosome [GO:0005694]; cytoplasm [GO:0005737]; cytoplasmic stress granule [GO:0010494]; nucleus [GO:0005634]; PcG protein complex [GO:0031519]	binding of sperm to zona pellucida [GO:0007339]; hematopoietic stem cell homeostasis [GO:0061484]; positive regulation of stress granule assembly [GO:0062029]; stress granule assembly [GO:0034063]	RNA binding [GO:0003723]	Recovered	cluster 2	0	-0.790578	-0.300835	-0.341749		cluster 2	0	-1.86414	-1.98453	-1.86649		cluster 10	0	-1.02869	-1.43901	-0.540042		cluster 2	0	0.238112	1.13817	0.198293		cluster 3	0	-1.07356	-1.6837	-1.52474
Q14186	TFDP1	Transcription factor Dp-1 (DRTF1-polypeptide 1) (DRTF1) (E2F dimerization partner 1)	chromatin [GO:0000785]; cytoplasm [GO:0005737]; cytosol [GO:0005829]; nucleoplasm [GO:0005654]; nucleus [GO:0005634]; Rb-E2F complex [GO:0035189]; RNA polymerase II transcription regulator complex [GO:0090575]	anoikis [GO:0043276]; cell cycle [GO:0007049]; epidermis development [GO:0008544]; negative regulation of fat cell proliferation [GO:0070345]; positive regulation of DNA-binding transcription factor activity [GO:0051091]; positive regulation of G1/S transition of mitotic cell cycle [GO:1900087]; positive regulation of transcription by RNA polymerase II [GO:0045944]; regulation of DNA biosynthetic…	cis-regulatory region sequence-specific DNA binding [GO:0000987]; DNA-binding transcription factor activity [GO:0003700]; DNA-binding transcription factor activity, RNA polymerase II-specific [GO:0000981]; DNA-binding transcription factor binding [GO:0140297]; protein domain specific binding [GO:0019904]; RNA polymerase II transcription regulatory region sequence-specific DNA binding [GO:0000977]	Recovered	cluster 2	0	-1.97401	-0.660572	-0.671675
Q14258	TRIM25	E3 ubiquitin/ISG15 ligase TRIM25 (EC 6.3.2.n3) (Estrogen-responsive finger protein) (RING finger protein 147) (RING-type E3 ubiquitin transferase) (EC 2.3.2.27) (RING-type E3 ubiquitin transferase TRIM25) (Tripartite motif-containing protein 25) (Ubiquitin/ISG15-conjugating enzyme TRIM25) (Zinc finger protein 147)	cytoplasm [GO:0005737]; cytoplasmic stress granule [GO:0010494]; cytosol [GO:0005829]; nuclear body [GO:0016604]; nucleoplasm [GO:0005654]	antiviral innate immune response [GO:0140374]; cellular response to leukemia inhibitory factor [GO:1990830]; cytoplasmic pattern recognition receptor signaling pathway [GO:0002753]; ERAD pathway [GO:0036503]; innate immune response [GO:0045087]; negative regulation of viral entry into host cell [GO:0046597]; positive regulation of canonical NF-kappaB signal transduction [GO:0043123]; positive reg…	cadherin binding [GO:0045296]; ligase activity [GO:0016874]; metal ion binding [GO:0046872]; RIG-I binding [GO:0039552]; RNA binding [GO:0003723]; transcription coactivator activity [GO:0003713]; ubiquitin protein ligase activity [GO:0061630]; ubiquitin-protein transferase activity [GO:0004842]	Recovered	cluster 2	0	-1.04332	-0.375498	-0.393946		cluster 4	0	-1.17151	-1.33348	-0.966472		cluster 10	0	-0.942551	-1.19211	-0.201076		cluster 2	0	-0.100771	0.816608	-0.192869		cluster 3	0	-0.128186	-0.957978	-0.572526
Q14318	FKBP8	Peptidyl-prolyl cis-trans isomerase FKBP8 (PPIase FKBP8) (EC 5.2.1.8) (38 kDa FK506-binding protein) (38 kDa FKBP) (FKBP-38) (hFKBP38) (FK506-binding protein 8) (FKBP-8) (FKBPR38) (Rotamase)	cytosol [GO:0005829]; endomembrane system [GO:0012505]; endoplasmic reticulum [GO:0005783]; endoplasmic reticulum membrane [GO:0005789]; membrane [GO:0016020]; mitochondrial envelope [GO:0005740]; mitochondrial membrane [GO:0031966]; mitochondrion [GO:0005739]; protein-containing complex [GO:0032991]	apoptotic process [GO:0006915]; BMP signaling pathway [GO:0030509]; camera-type eye development [GO:0043010]; dorsal/ventral neural tube patterning [GO:0021904]; intracellular signal transduction [GO:0035556]; multicellular organism growth [GO:0035264]; negative regulation of apoptotic process [GO:0043066]; negative regulation of protein phosphorylation [GO:0001933]; neuron fate specification [GO…	calmodulin binding [GO:0005516]; disordered domain specific binding [GO:0097718]; identical protein binding [GO:0042802]; metal ion binding [GO:0046872]; peptidyl-prolyl cis-trans isomerase activity [GO:0003755]; protein folding chaperone [GO:0044183]	Recovered	cluster 2	0	-0.64229	-0.12309	-0.0512841	Recovered	cluster 1	0	-1.51937	-1.13154	-0.723166								cluster 1	0	1.11731	1.71046	2.34074		cluster 3	0	-0.877081	-1.00845	-0.671882
Q14444	CAPRIN1	Caprin-1 (Cell cycle-associated protein 1) (Cytoplasmic activation- and proliferation-associated protein 1) (GPI-anchored membrane protein 1) (GPI-anchored protein p137) (GPI-p137) (p137GPI) (Membrane component chromosome 11 surface marker 1) (RNA granule protein 105)	cell leading edge [GO:0031252]; cytoplasm [GO:0005737]; cytoplasmic stress granule [GO:0010494]; cytosol [GO:0005829]; dendrite [GO:0030425]; intracellular non-membrane-bounded organelle [GO:0043232]; lamellipodium [GO:0030027]; membrane [GO:0016020]; P-body [GO:0000932]; synapse [GO:0045202]	generation of neurons [GO:0048699]; intracellular mRNA localization [GO:0008298]; negative regulation of translation [GO:0017148]; non-membrane-bounded organelle assembly [GO:0140694]; positive regulation of dendrite morphogenesis [GO:0050775]; positive regulation of dendritic spine morphogenesis [GO:0061003]; positive regulation of stress granule assembly [GO:0062029]; regulation of deadenylatio…	ATP binding [GO:0005524]; molecular condensate scaffold activity [GO:0140693]; molecular function activator activity [GO:0140677]; mRNA binding [GO:0003729]; RNA binding [GO:0003723]; signaling adaptor activity [GO:0035591]	Recovered	cluster 2	0	-2.94048	-1.90136	-1.36614
Q14676	MDC1	Mediator of DNA damage checkpoint protein 1 (Nuclear factor with BRCT domains 1)	chromosome [GO:0005694]; focal adhesion [GO:0005925]; nuclear body [GO:0016604]; nucleoplasm [GO:0005654]; nucleus [GO:0005634]; site of double-strand break [GO:0035861]	DNA damage response [GO:0006974]; DNA repair [GO:0006281]; DNA replication checkpoint signaling [GO:0000076]; mitotic intra-S DNA damage checkpoint signaling [GO:0031573]; positive regulation of transcription initiation by RNA polymerase II [GO:0060261]; protein localization to site of double-strand break [GO:1990166]	chromatin-protein adaptor activity [GO:0140463]; histone reader activity [GO:0140566]	Recovered	cluster 2	0	-0.972654	-0.255483	0.19578
Q14789	GOLGB1	Golgin subfamily B member 1 (372 kDa Golgi complex-associated protein) (GCP372) (Giantin) (Macrogolgin)	cis-Golgi network [GO:0005801]; cytosol [GO:0005829]; endoplasmic reticulum-Golgi intermediate compartment [GO:0005793]; Golgi apparatus [GO:0005794]; Golgi membrane [GO:0000139]; Golgi stack [GO:0005795]; membrane [GO:0016020]	Golgi organization [GO:0007030]; protein localization to pericentriolar material [GO:1905793]; regulation of DNA-templated transcription [GO:0006355]	RNA binding [GO:0003723]; sequence-specific DNA binding [GO:0043565]	Recovered	cluster 2	0	-1.80748	-1.36279	-0.103859		cluster 2	0	-0.758618	-0.801544	-0.837244														cluster 8	0	1.04886	0.561249	-0.733386
Q15003	NCAPH	Condensin complex subunit 2 (Barren homolog protein 1) (Chromosome-associated protein H) (hCAP-H) (Non-SMC condensin I complex subunit H) (XCAP-H homolog)	condensed nuclear chromosome [GO:0000794]; condensin complex [GO:0000796]; cytosol [GO:0005829]; membrane [GO:0016020]; nucleoplasm [GO:0005654]	cell division [GO:0051301]; female meiosis chromosome separation [GO:0051309]; meiotic chromosome condensation [GO:0010032]; mitotic chromosome condensation [GO:0007076]; positive regulation of chromosome condensation [GO:1905821]; positive regulation of chromosome segregation [GO:0051984]; positive regulation of chromosome separation [GO:1905820]	chromatin binding [GO:0003682]	Recovered	cluster 2	0	-1.31246	-0.48188	-0.508028
Q15042	RAB3GAP1	Rab3 GTPase-activating protein catalytic subunit (RAB3 GTPase-activating protein 130 kDa subunit) (Rab3-GAP p130) (Rab3-GAP)	cytosol [GO:0005829]; endoplasmic reticulum membrane [GO:0005789]; endoplasmic reticulum tubular network [GO:0071782]; extracellular exosome [GO:0070062]; Golgi apparatus [GO:0005794]; lipid droplet [GO:0005811]; postsynapse [GO:0098794]; protein-containing complex [GO:0032991]	brain development [GO:0007420]; camera-type eye development [GO:0043010]; establishment of protein localization to endoplasmic reticulum membrane [GO:0097051]; excitatory postsynaptic potential [GO:0060079]; face morphogenesis [GO:0060325]; hypothalamus development [GO:0021854]; lipid droplet organization [GO:0034389]; positive regulation of autophagosome assembly [GO:2000786]; positive regulatio…	GTPase activator activity [GO:0005096]; guanyl-nucleotide exchange factor activity [GO:0005085]; small GTPase binding [GO:0031267]	Recovered	cluster 2	0	-1.34446	-0.635408	-0.596825		cluster 4	0	-1.90118	-2.06069	-1.44956														cluster 3	0	-0.556722	-1.42529	-0.852737
Q15149	PLEC	Plectin (PCN) (PLTN) (Hemidesmosomal protein 1) (HD1) (Plectin-1)	axon [GO:0030424]; brush border [GO:0005903]; costamere [GO:0043034]; cytoplasm [GO:0005737]; cytosol [GO:0005829]; dendrite [GO:0030425]; extracellular exosome [GO:0070062]; focal adhesion [GO:0005925]; hemidesmosome [GO:0030056]; intermediate filament [GO:0005882]; intermediate filament cytoskeleton [GO:0045111]; mitochondrial outer membrane [GO:0005741]; myelin sheath [GO:0043209]; perinuclear…	actomyosin contractile ring assembly actin filament organization [GO:2000689]; adherens junction organization [GO:0034332]; cardiac muscle cell development [GO:0055013]; cell morphogenesis [GO:0000902]; cellular response to extracellular stimulus [GO:0031668]; cellular response to fluid shear stress [GO:0071498]; cellular response to hydrostatic pressure [GO:0071464]; cellular response to mechani…	actin filament binding [GO:0051015]; ankyrin binding [GO:0030506]; cadherin binding [GO:0045296]; dystroglycan binding [GO:0002162]; protein self-association [GO:0043621]; RNA binding [GO:0003723]; structural constituent of cytoskeleton [GO:0005200]; structural constituent of muscle [GO:0008307]	Recovered	cluster 2	0	-1.16729	-0.552227	-0.469598														cluster 8	0	2.40603	0.730867	4.6395		cluster 9	0	-0.343105	-2.24892	3.47613
Q15208	STK38	Serine/threonine-protein kinase 38 (EC 2.7.11.1) (NDR1 protein kinase) (Nuclear Dbf2-related kinase 1)	cytoplasm [GO:0005737]; cytosol [GO:0005829]; glutamatergic synapse [GO:0098978]; nucleus [GO:0005634]	intracellular signal transduction [GO:0035556]; negative regulation of MAP kinase activity [GO:0043407]; postsynapse organization [GO:0099173]; protein modification process [GO:0036211]; protein phosphorylation [GO:0006468]	ATP binding [GO:0005524]; cadherin binding [GO:0045296]; magnesium ion binding [GO:0000287]; mitogen-activated protein kinase kinase kinase binding [GO:0031435]; protein serine kinase activity [GO:0106310]; protein serine/threonine kinase activity [GO:0004674]	Recovered	cluster 2	0	-1.64235	-0.998543	-0.650784		cluster 4	0	-1.48918	-2.20334	-1.42418														cluster 5	0	0.153167	-1.2048	-0.773399
Q15382	RHEB	GTP-binding protein Rheb (Ras homolog enriched in brain) (EC 3.6.5.-)	cytosol [GO:0005829]; endomembrane system [GO:0012505]; endoplasmic reticulum membrane [GO:0005789]; extracellular exosome [GO:0070062]; Golgi membrane [GO:0000139]; lysosomal membrane [GO:0005765]; membrane [GO:0016020]; plasma membrane [GO:0005886]; postsynaptic density [GO:0014069]; spliceosomal complex [GO:0005681]	cellular response to nutrient levels [GO:0031669]; negative regulation of cold-induced thermogenesis [GO:0120163]; oligodendrocyte differentiation [GO:0048709]; positive regulation of oligodendrocyte differentiation [GO:0048714]; positive regulation of TOR signaling [GO:0032008]; positive regulation of TORC1 signaling [GO:1904263]; regulation of cell cycle [GO:0051726]; regulation of macroautopha…	GDP binding [GO:0019003]; GTP binding [GO:0005525]; GTPase activity [GO:0003924]; magnesium ion binding [GO:0000287]; protein kinase activator activity [GO:0030295]; protein kinase binding [GO:0019901]; protein serine/threonine kinase activator activity [GO:0043539]	Recovered	cluster 2	0	-1.15391	-0.615606	-0.294013		cluster 2	0	-1.49518	-1.67957	-1.56797		cluster 10	0	-0.777272	-0.845218	0.129885		cluster 2	0	-0.376641	0.229613	-0.423898	Decrease	cluster 1	0	-0.34127	-1.06397	-1.27396
Q15388	TOMM20	Mitochondrial import receptor subunit TOM20 homolog (Mitochondrial 20 kDa outer membrane protein) (Outer mitochondrial membrane receptor Tom20)	cell periphery [GO:0071944]; migrasome [GO:0140494]; mitochondria-associated endoplasmic reticulum membrane [GO:0044233]; mitochondrial outer membrane [GO:0005741]; mitochondrial outer membrane translocase complex [GO:0005742]; mitochondrion [GO:0005739]; sperm midpiece [GO:0097225]; TOM complex [GO:0140596]	protein import into mitochondrial matrix [GO:0030150]; protein insertion into mitochondrial outer membrane [GO:0045040]; protein targeting to mitochondrion [GO:0006626]; tRNA import into mitochondrion [GO:0016031]	mitochondrion targeting sequence binding [GO:0030943]; protein-transporting ATPase activity [GO:0015450]; unfolded protein binding [GO:0051082]	Recovered	cluster 2	0	-0.785941	-0.324927	-0.0890599								cluster 3	0	-1.83703	-2.14877	-1.94717		cluster 1	0	1.05109	1.82384	1.85811
Q15390	MTFR1	Mitochondrial fission regulator 1 (Chondrocyte protein with a poly-proline region)	cytosol [GO:0005829]; mitochondrion [GO:0005739]; plasma membrane [GO:0005886]	aerobic respiration [GO:0009060]; mitochondrial fission [GO:0000266]; mitochondrion organization [GO:0007005]		Recovered	cluster 2	0	-0.676359	-0.0936386	-0.0622173
Q15393	SF3B3	Splicing factor 3B subunit 3 (Pre-mRNA-splicing factor SF3b 130 kDa subunit) (SF3b130) (STAF130) (Spliceosome-associated protein 130) (SAP 130)	catalytic step 2 spliceosome [GO:0071013]; nucleolus [GO:0005730]; nucleoplasm [GO:0005654]; nucleus [GO:0005634]; SAGA complex [GO:0000124]; spliceosomal complex [GO:0005681]; U12-type spliceosomal complex [GO:0005689]; U2 snRNP [GO:0005686]; U2-type precatalytic spliceosome [GO:0071005]; U2-type spliceosomal complex [GO:0005684]	mRNA splicing, via spliceosome [GO:0000398]; negative regulation of protein catabolic process [GO:0042177]; positive regulation of DNA-templated transcription [GO:0045893]; regulation of DNA repair [GO:0006282]; regulation of RNA splicing [GO:0043484]; RNA splicing [GO:0008380]; RNA splicing, via transesterification reactions [GO:0000375]; U2-type prespliceosome assembly [GO:1903241]	protein-containing complex binding [GO:0044877]; U2 snRNA binding [GO:0030620]	Recovered	cluster 2	0	-0.791571	-0.300998	-0.231327		cluster 2	0	-1.56667	-1.39858	-1.42864														cluster 3	0	-0.775097	-1.09758	-1.19731
Q15418	RPS6KA1	Ribosomal protein S6 kinase alpha-1 (S6K-alpha-1) (EC 2.7.11.1) (90 kDa ribosomal protein S6 kinase 1) (p90-RSK 1) (p90RSK1) (p90S6K) (MAP kinase-activated protein kinase 1a) (MAPK-activated protein kinase 1a) (MAPKAP kinase 1a) (MAPKAPK-1a) (Ribosomal S6 kinase 1) (RSK-1)	cytoplasm [GO:0005737]; cytosol [GO:0005829]; nucleoplasm [GO:0005654]; synapse [GO:0045202]	cell cycle [GO:0007049]; chemical synaptic transmission [GO:0007268]; hepatocyte proliferation [GO:0072574]; intracellular signal transduction [GO:0035556]; negative regulation of apoptotic process [GO:0043066]; negative regulation of cysteine-type endopeptidase activity involved in apoptotic process [GO:0043154]; negative regulation of TOR signaling [GO:0032007]; positive regulation of cell diff…	ATP binding [GO:0005524]; cysteine-type endopeptidase inhibitor activity involved in apoptotic process [GO:0043027]; magnesium ion binding [GO:0000287]; protein serine kinase activity [GO:0106310]; protein serine/threonine kinase activity [GO:0004674]; protein serine/threonine/tyrosine kinase activity [GO:0004712]; ribosomal protein S6 kinase activity [GO:0004711]	Recovered	cluster 2	0	-0.621884	-0.0691004	-0.195067		cluster 2	0	-2.03622	-2.20919	-1.70796														cluster 3	0	-1.41434	-2.14009	-1.51289
Q15691	MAPRE1	Microtubule-associated protein RP/EB family member 1 (APC-binding protein EB1) (End-binding protein 1) (EB1)	cell projection membrane [GO:0031253]; centrosome [GO:0005813]; ciliary basal body [GO:0036064]; cortical microtubule cytoskeleton [GO:0030981]; cytoplasmic microtubule [GO:0005881]; cytosol [GO:0005829]; focal adhesion [GO:0005925]; Golgi apparatus [GO:0005794]; microtubule [GO:0005874]; microtubule organizing center [GO:0005815]; microtubule plus-end [GO:0035371]; mitotic spindle astral microtu…	attachment of mitotic spindle microtubules to kinetochore [GO:0051315]; cell division [GO:0051301]; cell migration [GO:0016477]; establishment of mitotic spindle orientation [GO:0000132]; microtubule bundle formation [GO:0001578]; microtubule polymerization [GO:0046785]; negative regulation of microtubule polymerization [GO:0031115]; non-motile cilium assembly [GO:1905515]; positive regulation of…	cadherin binding [GO:0045296]; identical protein binding [GO:0042802]; microtubule plus-end binding [GO:0051010]; protein kinase binding [GO:0019901]; RNA binding [GO:0003723]	Recovered	cluster 2	0	-1.69176	-0.205311	-0.376806		cluster 3	0	-1.62321	-1.77645	-2.13117								cluster 2	0	-0.239767	1.21907	0.178215	Decrease	cluster 1	0	0.0685532	-1.57114	-1.75436
Q15714	TSC22D1	TSC22 domain family protein 1 (Cerebral protein 2) (HUCEP-2) (Regulatory protein TSC-22) (TGFB-stimulated clone 22 homolog) (Transforming growth factor beta-1-induced transcript 4 protein)	cytoplasm [GO:0005737]; cytosol [GO:0005829]; mitochondrion [GO:0005739]; nucleus [GO:0005634]; plasma membrane [GO:0005886]	negative regulation of apoptotic process [GO:0043066]; negative regulation of hematopoietic stem cell proliferation [GO:1902034]; negative regulation of programmed cell death [GO:0043069]; positive regulation of apoptotic process [GO:0043065]; positive regulation of cell population proliferation [GO:0008284]; positive regulation of programmed cell death [GO:0043068]; positive regulation of transf…	identical protein binding [GO:0042802]	Recovered	cluster 2	0	-0.897234	-0.0493218	0.00581994		cluster 2	0	-1.24682	-1.14654	-1.07573								cluster 4	0	-0.629539	0.11145	-0.124393	Decrease	cluster 1	0	-0.349586	-1.09722	-1.08154
Q15907	RAB11B	Ras-related protein Rab-11B (EC 3.6.5.2) (GTP-binding protein YPT3)	cytosol [GO:0005829]; extracellular exosome [GO:0070062]; Golgi apparatus [GO:0005794]; phagocytic vesicle [GO:0045335]; phagocytic vesicle membrane [GO:0030670]; recycling endosome [GO:0055037]; recycling endosome membrane [GO:0055038]; synaptic vesicle [GO:0008021]; synaptic vesicle membrane [GO:0030672]	amyloid-beta clearance by transcytosis [GO:0150093]; cellular response to acidic pH [GO:0071468]; constitutive secretory pathway [GO:0045054]; endocytic recycling [GO:0032456]; establishment of protein localization to membrane [GO:0090150]; insulin secretion involved in cellular response to glucose stimulus [GO:0035773]; melanosome transport [GO:0032402]; receptor recycling [GO:0001881]; regulate…	cadherin binding [GO:0045296]; G protein activity [GO:0003925]; GDP binding [GO:0019003]; GTP binding [GO:0005525]; GTPase activity [GO:0003924]; myosin V binding [GO:0031489]	Recovered	cluster 2	0	-0.567239	-0.200572	-0.189811		cluster 3	0	-1.07917	-1.63281	-1.28934														cluster 3	0	-0.511927	-1.43224	-1.09953
Q16204	CCDC6	Coiled-coil domain-containing protein 6 (Papillary thyroid carcinoma-encoded protein) (Protein H4)	cytoskeleton [GO:0005856]; cytosol [GO:0005829]		identical protein binding [GO:0042802]; SH3 domain binding [GO:0017124]; structural constituent of cytoskeleton [GO:0005200]	Recovered	cluster 2	0	-0.606954	-0.48098	-0.288443	Recovered	cluster 1	0	-2.19137	-1.97423	-1.26409														cluster 2	0	-1.58442	-1.49325	-0.975648
Q16543	CDC37	Hsp90 co-chaperone Cdc37 (Hsp90 chaperone protein kinase-targeting subunit) (p50Cdc37) [Cleaved into: Hsp90 co-chaperone Cdc37, N-terminally processed]	cytoplasm [GO:0005737]; cytosol [GO:0005829]; extracellular exosome [GO:0070062]; HSP90-CDC37 chaperone complex [GO:1990565]; protein folding chaperone complex [GO:0101031]	positive regulation of mitophagy in response to mitochondrial depolarization [GO:0098779]; post-transcriptional regulation of gene expression [GO:0010608]; protein folding [GO:0006457]; protein stabilization [GO:0050821]; protein targeting [GO:0006605]; regulation of cyclin-dependent protein serine/threonine kinase activity [GO:0000079]; regulation of type I interferon-mediated signaling pathway …	heat shock protein binding [GO:0031072]; Hsp90 protein binding [GO:0051879]; kinase binding [GO:0019900]; protein kinase binding [GO:0019901]; protein kinase regulator activity [GO:0019887]; protein-folding chaperone binding [GO:0051087]; scaffold protein binding [GO:0097110]; unfolded protein binding [GO:0051082]	Recovered	cluster 2	0	-0.822871	-0.376037	-0.0489594																				cluster 5	0	0.004909	-2.14124	-1.16472
Q16643	DBN1	Drebrin (Developmentally-regulated brain protein)	actin cytoskeleton [GO:0015629]; actin filament [GO:0005884]; actomyosin [GO:0042641]; cortical actin cytoskeleton [GO:0030864]; cortical cytoskeleton [GO:0030863]; cytoplasm [GO:0005737]; cytoskeleton [GO:0005856]; dendrite [GO:0030425]; gap junction [GO:0005921]; glutamatergic synapse [GO:0098978]; growth cone [GO:0030426]; lamellipodium [GO:0030027]; postsynaptic cytosol [GO:0099524]; postsyna…	actin filament organization [GO:0007015]; cell communication by chemical coupling [GO:0010643]; cell communication by electrical coupling [GO:0010644]; cytoplasmic sequestering of protein [GO:0051220]; in utero embryonic development [GO:0001701]; maintenance of protein location in cell [GO:0032507]; neural precursor cell proliferation [GO:0061351]; neuron projection morphogenesis [GO:0048812]; po…	actin binding [GO:0003779]; actin filament binding [GO:0051015]; cadherin binding [GO:0045296]; profilin binding [GO:0005522]	Recovered	cluster 2	0	-2.06104	-0.49021	0.161071
Q3V6T2	CCDC88A	Girdin (Akt phosphorylation enhancer) (APE) (Coiled-coil domain-containing protein 88A) (G alpha-interacting vesicle-associated protein) (GIV) (Girders of actin filament) (Hook-related protein 1) (HkRP1)	centriole [GO:0005814]; centrosome [GO:0005813]; ciliary basal body [GO:0036064]; COPI-coated Golgi to ER transport vesicle [GO:0030142]; cytoplasm [GO:0005737]; cytoplasmic vesicle [GO:0031410]; cytosol [GO:0005829]; endoplasmic reticulum [GO:0005783]; Golgi apparatus [GO:0005794]; lamellipodium [GO:0030027]; membrane [GO:0016020]; plasma membrane [GO:0005886]	activation of protein kinase activity [GO:0032147]; cell migration [GO:0016477]; cytoplasmic microtubule organization [GO:0031122]; cytoskeleton-dependent intracellular transport [GO:0030705]; lamellipodium assembly [GO:0030032]; maintenance of protein location in plasma membrane [GO:0072660]; membrane organization [GO:0061024]; nervous system development [GO:0007399]; positive regulation of cili…	actin binding [GO:0003779]; dynein light intermediate chain binding [GO:0051959]; epidermal growth factor receptor binding [GO:0005154]; G-protein alpha-subunit binding [GO:0001965]; G-protein gamma-subunit binding [GO:0031682]; GDP-dissociation inhibitor activity [GO:0005092]; guanyl-nucleotide exchange factor activity [GO:0005085]; insulin receptor binding [GO:0005158]; microtubule binding [GO:…	Recovered	cluster 2	0	-1.23503	-0.538472	-0.495667
Q53EV4	LRRC23	Leucine-rich repeat-containing protein 23 (Leucine-rich protein B7)	cytoplasm [GO:0005737]; cytosol [GO:0005829]			Recovered	cluster 2	0	-1.60731	-0.664637	-0.232591
Q53H96	PYCR3	Pyrroline-5-carboxylate reductase 3 (P5C reductase 3) (P5CR 3) (EC 1.5.1.2) (Pyrroline-5-carboxylate reductase-like protein)	cytosol [GO:0005829]; intercellular bridge [GO:0045171]; mitotic spindle [GO:0072686]	L-proline biosynthetic process [GO:0055129]	pyrroline-5-carboxylate reductase activity [GO:0004735]	Recovered	cluster 2	0	-2.34603	-0.625852	-0.708758																			Decrease	cluster 1	0	0.680268	-0.397765	-1.02629
Q53T59	HS1BP3	HCLS1-binding protein 3 (HS1-binding protein 3) (HSP1BP-3)	endoplasmic reticulum [GO:0005783]; mitochondrion [GO:0005739]	regulation of apoptotic process [GO:0042981]	phosphatidylinositol binding [GO:0035091]	Recovered	cluster 2	0	-1.49685	-0.15497	-0.447	Recovered	cluster 1	0	-3.08069	-2.82852	-1.70118														cluster 3	0	-1.58384	-2.67355	-1.25418
Q5H9F3	BCORL1	BCL-6 corepressor-like protein 1 (BCoR-L1) (BCoR-like protein 1)	nucleoplasm [GO:0005654]; nucleus [GO:0005634]; plasma membrane [GO:0005886]	chromatin organization [GO:0006325]; negative regulation of transcription by RNA polymerase II [GO:0000122]	transcription corepressor activity [GO:0003714]	Recovered	cluster 2	0	-1.16067	-0.357029	-0.620748
Q5HYI7	MTX3	Metaxin-3	cytoplasm [GO:0005737]; MIB complex [GO:0140275]; SAM complex [GO:0001401]	inner mitochondrial membrane organization [GO:0007007]; mitochondrion organization [GO:0007005]; protein transport [GO:0015031]		Recovered	cluster 2	0	-0.824807	-0.537526	-0.338755
Q5JSH3	WDR44	WD repeat-containing protein 44 (Rab11-binding protein) (Rab11BP) (Rabphilin-11)	cytosol [GO:0005829]; endosome membrane [GO:0010008]; Golgi apparatus [GO:0005794]; perinuclear region of cytoplasm [GO:0048471]	cytosolic ciliogenesis [GO:0061824]; negative regulation of cilium assembly [GO:1902018]; regulation of vesicle-mediated transport [GO:0060627]	molecular sequestering activity [GO:0140313]; small GTPase binding [GO:0031267]	Recovered	cluster 2	0	-1.72653	-0.337669	-0.411476		cluster 4	0	-3.12021	-3.21042	-1.76121														cluster 3	0	-1.39369	-2.87275	-1.34973
Q5SW79	CEP170	Centrosomal protein of 170 kDa (Cep170) (KARP-1-binding protein) (KARP1-binding protein)	centriolar subdistal appendage [GO:0120103]; centriole [GO:0005814]; centrosome [GO:0005813]; cytosol [GO:0005829]; microtubule [GO:0005874]; spindle [GO:0005819]			Recovered	cluster 2	0	-1.92864	-0.661572	-0.869238																			Decrease	cluster 1	0	-1.35452	-1.30355	-2.24554
Q5T0N5	FNBP1L	Formin-binding protein 1-like (Transducer of Cdc42-dependent actin assembly protein 1) (Toca-1)	cell cortex [GO:0005938]; cytoplasm [GO:0005737]; cytoplasmic vesicle [GO:0031410]; cytoskeleton [GO:0005856]; cytosol [GO:0005829]; plasma membrane [GO:0005886]	autophagy [GO:0006914]; cilium assembly [GO:0060271]; clathrin-dependent endocytosis [GO:0072583]; membrane invagination [GO:0010324]; plasma membrane tubulation [GO:0097320]; positive regulation of filopodium assembly [GO:0051491]; signal transduction [GO:0007165]; vesicle budding from membrane [GO:0006900]; vesicle organization [GO:0016050]; vesicle transport along actin filament [GO:0030050]	cadherin binding [GO:0045296]; GTPase binding [GO:0051020]; lipid binding [GO:0008289]	Recovered	cluster 2	0	-0.881572	-0.337559	-0.308708	Recovered	cluster 1	0	-1.73501	-1.51587	-0.903223								cluster 2	0	-1.82351	0.746159	-1.91882		cluster 3	0	-0.853441	-1.17831	-0.594516
Q5T3I0	GPATCH4	G patch domain-containing protein 4	nucleolus [GO:0005730]		RNA binding [GO:0003723]	Recovered	cluster 2	0	-1.20794	-0.408087	-0.205452		cluster 2	0	-2.31813	-2.32189	-2.2599		cluster 6	0	-0.88638	-1.13706	-0.849043	Increase	cluster 3	0	-0.321564	0.728974	0.643591		cluster 3	0	-1.11018	-1.9138	-2.05444
Q5T5U3	ARHGAP21	Rho GTPase-activating protein 21 (Rho GTPase-activating protein 10) (Rho-type GTPase-activating protein 21)	actin cytoskeleton [GO:0015629]; anchoring junction [GO:0070161]; cell junction [GO:0030054]; cytoplasmic vesicle membrane [GO:0030659]; cytosol [GO:0005829]; Golgi apparatus [GO:0005794]; Golgi membrane [GO:0000139]; plasma membrane [GO:0005886]	establishment of Golgi localization [GO:0051683]; Golgi localization [GO:0051645]; Golgi organization [GO:0007030]; maintenance of Golgi location [GO:0051684]; organelle transport along microtubule [GO:0072384]; regulation of small GTPase mediated signal transduction [GO:0051056]; signal transduction [GO:0007165]	GTPase activator activity [GO:0005096]	Recovered	cluster 2	0	-0.573202	-0.180951	0.0602374		cluster 3	0	-1.83557	-1.63043	-1.97596	Increase	cluster 14	0	0.0229864	0.230773	0.892721	Decrease	cluster 6	0	-0.596188	-0.411724	-0.832484	Decrease	cluster 1	0	-1.26237	-1.44948	-2.03619
Q5T6F2	UBAP2	Ubiquitin-associated protein 2 (UBAP-2) (RNA polymerase II degradation factor UBAP2)	chromosome [GO:0005694]; cytoplasm [GO:0005737]; nucleus [GO:0005634]; P-body [GO:0000932]	regulation of gene expression [GO:0010468]	cadherin binding [GO:0045296]; RNA binding [GO:0003723]	Recovered	cluster 2	0	-1.44342	-0.49124	-0.188465
Q5T8D3	ACBD5	Acyl-CoA-binding domain-containing protein 5	cytoplasm [GO:0005737]; cytosol [GO:0005829]; membrane [GO:0016020]; nucleoplasm [GO:0005654]; peroxisomal membrane [GO:0005778]; peroxisome [GO:0005777]	fatty acid metabolic process [GO:0006631]; pexophagy [GO:0000425]	fatty-acyl-CoA binding [GO:0000062]	Recovered	cluster 2	0	-1.17731	-0.532736	-0.305175																				cluster 7	0	-1.90448	-1.90863	-2.13928
Q5VT06	CEP350	Centrosome-associated protein 350 (Cep350) (Centrosome-associated protein of 350 kDa)	cell projection [GO:0042995]; centriole [GO:0005814]; centrosome [GO:0005813]; cytoplasm [GO:0005737]; membrane [GO:0016020]; nucleus [GO:0005634]; spindle [GO:0005819]	microtubule anchoring [GO:0034453]; non-motile cilium assembly [GO:1905515]; protein localization to centrosome [GO:0071539]	microtubule binding [GO:0008017]	Recovered	cluster 2	0	-0.531826	-0.0967361	-0.0314874		cluster 2	0	-1.4559	-1.48032	-1.43518		cluster 10	0	-0.661013	-0.879001	-0.416469		cluster 2	0	0.129187	0.782265	0.384981		cluster 3	0	-0.924079	-1.38359	-1.40369
Q5W0V3	FHIP2A	FHF complex subunit HOOK interacting protein 2A (FHIP2A)				Recovered	cluster 2	0	-1.06656	-0.261911	0.0756328	Recovered	cluster 1	0	-1.16706	-0.746218	-0.749884													Decrease	cluster 1	0	-0.100504	-0.484307	-0.825517
Q6N043	ZNF280D	Zinc finger protein 280D (Suppressor of hairy wing homolog 4) (Zinc finger protein 634)	nucleus [GO:0005634]	regulation of DNA-templated transcription [GO:0006355]	DNA-binding transcription factor activity, RNA polymerase II-specific [GO:0000981]; metal ion binding [GO:0046872]; RNA polymerase II cis-regulatory region sequence-specific DNA binding [GO:0000978]	Recovered	cluster 2	0	-1.22747	-0.319918	0.206564
Q6P1J9	CDC73	Parafibromin (Cell division cycle protein 73 homolog) (Hyperparathyroidism 2 protein)	Cdc73/Paf1 complex [GO:0016593]; chromosome, telomeric region [GO:0000781]; cytosol [GO:0005829]; nucleoplasm [GO:0005654]; nucleus [GO:0005634]	cell cycle [GO:0007049]; cellular response to lipopolysaccharide [GO:0071222]; endodermal cell fate commitment [GO:0001711]; mRNA 3'-end processing [GO:0031124]; negative regulation of apoptotic process [GO:0043066]; negative regulation of cell population proliferation [GO:0008285]; negative regulation of epithelial cell proliferation [GO:0050680]; negative regulation of fibroblast proliferation …	RNA polymerase II complex binding [GO:0000993]	Recovered	cluster 2	0	-0.881159	-0.661433	-0.361269														cluster 8	0	0.280521	0.0989714	0.503479		cluster 3	0	-2.07973	-2.49733	-2.3142
Q6PJT7	ZC3H14	Zinc finger CCCH domain-containing protein 14 (Mammalian suppressor of tau pathology-2) (MSUT-2) (Renal carcinoma antigen NY-REN-37)	axon cytoplasm [GO:1904115]; cytoplasm [GO:0005737]; dendrite cytoplasm [GO:0032839]; nuclear speck [GO:0016607]; nucleolus [GO:0005730]; nucleus [GO:0005634]; ribonucleoprotein complex [GO:1990904]	negative regulation of mRNA polyadenylation [GO:1900364]; regulation of mRNA stability [GO:0043488]	metal ion binding [GO:0046872]; poly(A) binding [GO:0008143]; RNA binding [GO:0003723]	Recovered	cluster 2	0	-1.07557	-0.212003	0.02339		cluster 2	0	-2.25061	-1.89419	-2.08773														cluster 3	0	-1.17504	-1.68218	-2.11112
Q6W2J9	BCOR	BCL-6 corepressor (BCoR)	BCOR complex [GO:0140261]; nucleoplasm [GO:0005654]; nucleus [GO:0005634]	blastocyst hatching [GO:0001835]; chromatin remodeling [GO:0006338]; heart development [GO:0007507]; negative regulation of bone mineralization [GO:0030502]; negative regulation of DNA-templated transcription [GO:0045892]; negative regulation of tooth mineralization [GO:0070171]; negative regulation of transcription by RNA polymerase II [GO:0000122]; odontogenesis [GO:0042476]; roof of mouth deve…	DNA-binding transcription factor binding [GO:0140297]; heat shock protein binding [GO:0031072]; histone deacetylase binding [GO:0042826]; RNA polymerase II transcription regulatory region sequence-specific DNA binding [GO:0000977]; transcription cis-regulatory region binding [GO:0000976]; transcription corepressor activity [GO:0003714]	Recovered	cluster 2	0	-2.47795	-0.360048	-0.252866
Q6ZSG2	INSYN2A	Inhibitory synaptic factor 2A (InSyn2)	postsynaptic density [GO:0014069]	inhibitory postsynaptic potential [GO:0060080]		Recovered	cluster 2	0	-0.665465	-0.161364	-0.222076
Q6ZSR9		Uncharacterized protein FLJ45252				Recovered	cluster 2	0	-0.898734	-0.108644	0.0106604		cluster 3	0	-1.44517	-2.33692	-1.78989		cluster 15	0	-0.920797	0.554406	0.57394		cluster 10	0	0.0220633	-0.66305	-0.563279		cluster 3	0	-0.546435	-2.22827	-1.80055
Q709C8	VPS13C	Intermembrane lipid transfer protein VPS13C (Vacuolar protein sorting-associated protein 13C)	cytoplasm [GO:0005737]; cytosol [GO:0005829]; dense core granule membrane [GO:0032127]; endoplasmic reticulum membrane [GO:0005789]; extracellular exosome [GO:0070062]; extrinsic component of membrane [GO:0019898]; late endosome [GO:0005770]; late endosome membrane [GO:0031902]; lipid droplet [GO:0005811]; lysosomal membrane [GO:0005765]; lysosome [GO:0005764]; mitochondrial outer membrane [GO:00…	Golgi to endosome transport [GO:0006895]; lipid transport [GO:0006869]; mitochondrion organization [GO:0007005]; negative regulation of parkin-mediated stimulation of mitophagy in response to mitochondrial depolarization [GO:1905090]; protein retention in Golgi apparatus [GO:0045053]; protein targeting to vacuole [GO:0006623]; response to insulin [GO:0032868]		Recovered	cluster 2	0	-1.38266	-0.781434	-0.375947		cluster 2	0	-1.6683	-1.55802	-1.0791														cluster 3	0	-0.285642	-0.77659	-0.703151
Q71RC2	LARP4	La-related protein 4 (La ribonucleoprotein domain family member 4)	cytoplasmic stress granule [GO:0010494]; cytosol [GO:0005829]; membrane [GO:0016020]	cytoskeleton organization [GO:0007010]; positive regulation of translation [GO:0045727]; post-transcriptional regulation of gene expression [GO:0010608]; regulation of cell morphogenesis [GO:0022604]; translation [GO:0006412]	mRNA 3'-UTR binding [GO:0003730]; poly(A) binding [GO:0008143]; RNA binding [GO:0003723]	Recovered	cluster 2	0	-1.58852	-0.970682	-0.405927
Q7L014	DDX46	Probable ATP-dependent RNA helicase DDX46 (EC 3.6.4.13) (DEAD box protein 46) (PRP5 homolog)	Cajal body [GO:0015030]; cytosol [GO:0005829]; fibrillar center [GO:0001650]; nuclear speck [GO:0016607]; nucleoplasm [GO:0005654]; nucleus [GO:0005634]; spliceosomal complex [GO:0005681]; U2 snRNP [GO:0005686]; U2-type spliceosomal complex [GO:0005684]	mRNA splicing, via spliceosome [GO:0000398]; U2-type prespliceosome assembly [GO:1903241]	ATP binding [GO:0005524]; ATP hydrolysis activity [GO:0016887]; RNA binding [GO:0003723]; RNA helicase activity [GO:0003724]	Recovered	cluster 2	0	-0.748675	-0.118346	-0.0676182		cluster 2	0	-1.51783	-1.18124	-1.32657		cluster 6	0	-1.40143	-2.16512	-1.25548		cluster 2	0	0.652753	2.04677	1.18786		cluster 3	0	-0.76916	-1.06289	-1.25895
Q7L1Q6	BZW1	eIF5-mimic protein 2 (Basic leucine zipper and W2 domain-containing protein 1) (Protein Orf)	cytoplasm [GO:0005737]; membrane [GO:0016020]	regulation of translational initiation [GO:0006446]	cadherin binding [GO:0045296]; RNA binding [GO:0003723]	Recovered	cluster 2	0	-1.21206	-0.40735	-0.140377		cluster 2	0	-3.50056	-1.47628	-2.52505														cluster 7	0	-2.2885	-1.06893	-2.38468
Q7Z2Z2	EFL1	Elongation factor-like GTPase 1 (Elongation factor Tu GTP-binding domain-containing protein 1) (Elongation factor-like 1) (Protein FAM42A)	cytosol [GO:0005829]; ribonucleoprotein complex [GO:1990904]	cytosolic ribosome assembly [GO:0042256]; GTP metabolic process [GO:0046039]	GTP binding [GO:0005525]; GTPase activity [GO:0003924]; ribosome binding [GO:0043022]; translation elongation factor activity [GO:0003746]	Recovered	cluster 2	0	-1.07556	-0.599551	-0.356814																			Decrease	cluster 1	0	-0.759779	-1.15253	-1.87218
Q7Z3U7	MON2	Protein MON2 homolog (Protein SF21)	cytosol [GO:0005829]; early endosome membrane [GO:0031901]; extracellular exosome [GO:0070062]	Golgi to endosome transport [GO:0006895]; protein transport [GO:0015031]		Recovered	cluster 2	0	-0.9628	-0.371264	-0.165918		cluster 3	0	-1.28394	-1.23604	-1.41232													Decrease	cluster 1	0	-0.321141	-0.864779	-1.24641
Q86V48	LUZP1	Leucine zipper protein 1	centrosome [GO:0005813]; cytoplasm [GO:0005737]; extracellular exosome [GO:0070062]; membrane [GO:0016020]; nucleus [GO:0005634]	artery development [GO:0060840]; neural fold bending [GO:0021503]; ventricular septum development [GO:0003281]		Recovered	cluster 2	0	-1.42682	-0.770328	-0.464046		cluster 4	0	-2.10777	-3.47254	-1.81938								cluster 8	0	-0.810007	-1.11143	0.00144138		cluster 3	0	-0.680945	-2.70221	-1.35534
Q86W92	PPFIBP1	Liprin-beta-1 (Protein tyrosine phosphatase receptor type f polypeptide-interacting protein-binding protein 1) (PTPRF-interacting protein-binding protein 1) (hSGT2)	cytosol [GO:0005829]; focal adhesion [GO:0005925]; plasma membrane [GO:0005886]; presynaptic active zone [GO:0048786]	cell adhesion [GO:0007155]; neuromuscular junction development [GO:0007528]	cadherin binding [GO:0045296]	Recovered	cluster 2	0	-1.16496	-0.850763	-0.250305		cluster 3	0	-1.99713	-2.65427	-2.01791							Decrease	cluster 6	0	-1.2679	-0.10711	-1.38054		cluster 3	0	-0.832168	-1.80351	-1.7676
Q86XZ4	SPATS2	Spermatogenesis-associated serine-rich protein 2 (Serine-rich spermatocytes and round spermatid 59 kDa protein) (p59scr)	cytoplasm [GO:0005737]; cytosol [GO:0005829]		RNA binding [GO:0003723]	Recovered	cluster 2	0	-0.946628	-0.130744	0.114411
Q8IV50	LYSMD2	LysM and putative peptidoglycan-binding domain-containing protein 2				Recovered	cluster 2	0	-0.95463	-0.513257	-0.351002		cluster 2	0	-1.14785	-0.973683	-0.928872							Increase	cluster 3	0	-0.434345	0.841061	0.534995	Decrease	cluster 1	0	-0.193217	-0.460426	-0.57787
Q8IVF2	AHNAK2	Protein AHNAK2	costamere [GO:0043034]; cytoplasm [GO:0005737]; cytosol [GO:0005829]; nucleus [GO:0005634]; plasma membrane [GO:0005886]; sarcolemma [GO:0042383]; T-tubule [GO:0030315]	regulation of RNA splicing [GO:0043484]		Recovered	cluster 2	0	-0.96319	-0.440811	-0.283638		cluster 4	0	-1.73399	-1.99437	-1.19135		cluster 9	0	-0.38764	-0.697342	0.753807	Decrease	cluster 6	0	-0.575549	0.256531	-1.03744		cluster 3	0	-0.770796	-1.55356	-0.907712
Q8IWE2	FAM114A1	Protein NOXP20 (Nervous system overexpressed protein 20) (Protein FAM114A1)	cytosol [GO:0005829]; Golgi apparatus [GO:0005794]; nucleoplasm [GO:0005654]			Recovered	cluster 2	0	-0.679128	-0.268414	-0.303228	Recovered	cluster 1	0	-1.26828	-1.11986	-0.610318														cluster 3	0	-0.58915	-0.85145	-0.30709
Q8IWR0	ZC3H7A	Zinc finger CCCH domain-containing protein 7A	nucleus [GO:0005634]	miRNA processing [GO:0035196]; post-transcriptional regulation of gene expression [GO:0010608]	metal ion binding [GO:0046872]; miRNA binding [GO:0035198]; RNA binding [GO:0003723]	Recovered	cluster 2	0	-1.58935	-0.530791	-0.627129																				cluster 5	0	0.399343	-1.08117	-0.198441
Q8IXI1	RHOT2	Mitochondrial Rho GTPase 2 (MIRO-2) (hMiro-2) (EC 3.6.5.-) (Ras homolog gene family member T2)	membrane [GO:0016020]; mitochondrial outer membrane [GO:0005741]; mitochondrion [GO:0005739]	actin filament organization [GO:0007015]; cellular homeostasis [GO:0019725]; mitochondrial outer membrane permeabilization [GO:0097345]; mitochondrion organization [GO:0007005]; mitochondrion transport along microtubule [GO:0047497]; signal transduction [GO:0007165]; small GTPase-mediated signal transduction [GO:0007264]	calcium ion binding [GO:0005509]; GTP binding [GO:0005525]; GTPase activity [GO:0003924]	Recovered	cluster 2	0	-0.552722	-0.139578	0.111441
Q8IZ21	PHACTR4	Phosphatase and actin regulator 4	cytoplasm [GO:0005737]; lamellipodium [GO:0030027]	actin cytoskeleton organization [GO:0030036]; closure of optic fissure [GO:0061386]; enteric nervous system development [GO:0048484]; negative regulation of integrin-mediated signaling pathway [GO:2001045]; neural crest cell migration [GO:0001755]; neural tube closure [GO:0001843]; positive regulation of catalytic activity [GO:0043085]; regulation of cell cycle [GO:0051726]; Rho protein signal tr…	actin binding [GO:0003779]; protein phosphatase 1 binding [GO:0008157]; protein phosphatase activator activity [GO:0072542]	Recovered	cluster 2	0	-1.43664	-0.766202	-0.223532		cluster 4	0	-2.2806	-3.95304	-1.91562														cluster 3	0	-0.843954	-3.18684	-1.69208
Q8N129	CNPY4	Protein canopy homolog 4	extracellular region [GO:0005576]	positive regulation of protein localization to plasma membrane [GO:1903078]	signaling receptor binding [GO:0005102]	Recovered	cluster 2	0	-0.738122	-0.470854	-0.0560535
Q8N2F6	ARMC10	Armadillo repeat-containing protein 10 (Splicing variant involved in hepatocarcinogenesis protein)	endoplasmic reticulum [GO:0005783]; endoplasmic reticulum membrane [GO:0005789]; mitochondrial outer membrane [GO:0005741]; mitochondrion [GO:0005739]	negative regulation of apoptotic process [GO:0043066]; negative regulation of intrinsic apoptotic signaling pathway by p53 class mediator [GO:1902254]; positive regulation of growth rate [GO:0040010]	DNA binding domain binding [GO:0050692]; p53 binding [GO:0002039]	Recovered	cluster 2	0	-0.77389	-0.131207	-0.0706168
Q8N3C0	ASCC3	Activating signal cointegrator 1 complex subunit 3 (EC 3.6.4.12) (ASC-1 complex subunit p200) (ASC1p200) (Helicase, ATP binding 1) (Trip4 complex subunit p200)	activating signal cointegrator 1 complex [GO:0099053]; cytosol [GO:0005829]; cytosolic ribosome [GO:0022626]; DNA repair complex [GO:1990391]; membrane [GO:0016020]; nuclear speck [GO:0016607]; nucleoplasm [GO:0005654]; nucleus [GO:0005634]	cell population proliferation [GO:0008283]; DNA dealkylation involved in DNA repair [GO:0006307]; DNA duplex unwinding [GO:0032508]; rescue of stalled ribosome [GO:0072344]; ribosome disassembly [GO:0032790]; ribosome-associated ubiquitin-dependent protein catabolic process [GO:1990116]	3'-5' DNA helicase activity [GO:0043138]; ATP binding [GO:0005524]; ATP hydrolysis activity [GO:0016887]; RNA binding [GO:0003723]	Recovered	cluster 2	0	-0.771062	-0.294327	-0.0223743		cluster 2	0	-1.79654	-1.28883	-1.25453														cluster 7	0	-1.02548	-0.994502	-1.23216
Q8N3R9	PALS1	Protein PALS1 (MAGUK p55 subfamily member 5) (Membrane protein, palmitoylated 5) (Protein associated with Lin-7 1)	adherens junction [GO:0005912]; apical junction complex [GO:0043296]; apical plasma membrane [GO:0016324]; axon [GO:0030424]; bicellular tight junction [GO:0005923]; cytoplasm [GO:0005737]; endoplasmic reticulum-Golgi intermediate compartment membrane [GO:0033116]; extracellular exosome [GO:0070062]; Golgi apparatus [GO:0005794]; lateral loop [GO:0043219]; myelin sheath adaxonal region [GO:003574…	central nervous system neuron development [GO:0021954]; cerebral cortex development [GO:0021987]; establishment or maintenance of epithelial cell apical/basal polarity [GO:0045197]; establishment or maintenance of polarity of embryonic epithelium [GO:0016332]; gene expression [GO:0010467]; generation of neurons [GO:0048699]; morphogenesis of an epithelial sheet [GO:0002011]; myelin assembly [GO:0…	ATP binding [GO:0005524]; identical protein binding [GO:0042802]; protein domain specific binding [GO:0019904]	Recovered	cluster 2	0	-1.35817	-0.480377	-0.553681		cluster 3	0	-2.87722	-3.70214	-3.05862														cluster 3	0	-1.51905	-3.22177	-2.50494
Q8N556	AFAP1	Actin filament-associated protein 1 (110 kDa actin filament-associated protein) (AFAP-110)	actin cytoskeleton [GO:0015629]; cytosol [GO:0005829]; focal adhesion [GO:0005925]; stress fiber [GO:0001725]		actin binding [GO:0003779]; SH2 domain binding [GO:0042169]; SH3 domain binding [GO:0017124]	Recovered	cluster 2	0	-1.64637	-0.971491	-0.321369
Q8N6N3	C1orf52	UPF0690 protein C1orf52 (BCL10-associated gene protein)	nucleoplasm [GO:0005654]		RNA binding [GO:0003723]	Recovered	cluster 2	0	-0.782413	-0.145532	0.133778
Q8N6T3	ARFGAP1	ADP-ribosylation factor GTPase-activating protein 1 (ARF GAP 1) (ADP-ribosylation factor 1 GTPase-activating protein) (ARF1 GAP) (ARF1-directed GTPase-activating protein)	cytosol [GO:0005829]; Golgi membrane [GO:0000139]; synapse [GO:0045202]	protein transport [GO:0015031]; regulation of ARF protein signal transduction [GO:0032012]; regulation of endocytosis [GO:0030100]; vesicle-mediated transport [GO:0016192]	GTPase activator activity [GO:0005096]; metal ion binding [GO:0046872]	Recovered	cluster 2	0	-0.737491	-0.276028	-0.0708822		cluster 2	0	-1.27124	-1.15531	-1.00105		cluster 13	0	0.222479	-0.274473	1.15133	Decrease	cluster 6	0	-0.959971	-0.00155441	-1.22221		cluster 3	0	-0.533749	-0.879279	-0.930163
Q8NBU5	ATAD1	Outer mitochondrial transmembrane helix translocase (EC 7.4.2.-) (ATPase family AAA domain-containing protein 1) (hATAD1) (Thorase)	cytosol [GO:0005829]; glutamatergic synapse [GO:0098978]; membrane [GO:0016020]; mitochondrial outer membrane [GO:0005741]; peroxisomal membrane [GO:0005778]; postsynaptic membrane [GO:0045211]	extraction of mislocalized protein from mitochondrial outer membrane [GO:0140570]; learning [GO:0007612]; memory [GO:0007613]; negative regulation of synaptic transmission, glutamatergic [GO:0051967]; positive regulation of receptor internalization [GO:0002092]; regulation of postsynaptic neurotransmitter receptor internalization [GO:0099149]	ATP binding [GO:0005524]; ATP hydrolysis activity [GO:0016887]; membrane protein dislocase activity [GO:0140567]	Recovered	cluster 2	0	-0.75251	-0.225977	-0.385028
Q8NEL9	DDHD1	Phospholipase DDHD1 (EC 3.1.1.111) (EC 3.1.1.32) (DDHD domain-containing protein 1) (Phosphatidic acid-preferring phospholipase A1 homolog) (PA-PLA1) (EC 3.1.1.118) (Phospholipid sn-1 acylhydrolase)	cytoplasm [GO:0005737]; cytosol [GO:0005829]	phosphatidylinositol metabolic process [GO:0046488]; positive regulation of mitochondrial fission [GO:0090141]	metal ion binding [GO:0046872]; phospholipase A1 activity [GO:0008970]; phospholipase activity [GO:0004620]	Recovered	cluster 2	0	-2.35271	-0.506715	-0.634228																			Decrease	cluster 1	0	1.45848	-1.37516	-2.36775
Q8NFC6	BOD1L1	Biorientation of chromosomes in cell division protein 1-like 1	chromosome [GO:0005694]; nucleoplasm [GO:0005654]; Set1C/COMPASS complex [GO:0048188]	DNA damage response [GO:0006974]; DNA repair [GO:0006281]; replication fork processing [GO:0031297]		Recovered	cluster 2	0	-1.39569	-0.113389	0.0570499
Q8TD16	BICD2	Protein bicaudal D homolog 2 (Bic-D 2)	annulate lamellae [GO:0005642]; centrosome [GO:0005813]; cytoplasm [GO:0005737]; cytoplasmic vesicle [GO:0031410]; cytosol [GO:0005829]; Golgi apparatus [GO:0005794]; nuclear envelope [GO:0005635]; nuclear pore [GO:0005643]; plasma membrane [GO:0005886]	centrosome localization [GO:0051642]; microtubule anchoring at microtubule organizing center [GO:0072393]; microtubule-based movement [GO:0007018]; minus-end-directed organelle transport along microtubule [GO:0072385]; mRNA transport [GO:0051028]; protein localization to Golgi apparatus [GO:0034067]; protein transport [GO:0015031]; regulation of microtubule cytoskeleton organization [GO:0070507];…	cytoskeletal anchor activity [GO:0008093]; dynactin binding [GO:0034452]; dynein complex binding [GO:0070840]; dynein light intermediate chain binding [GO:0051959]; small GTPase binding [GO:0031267]	Recovered	cluster 2	0	-1.31472	-0.479173	-0.566891
Q8TEA8	DTD1	D-aminoacyl-tRNA deacylase 1 (DTD) (EC 3.1.1.96) (DNA-unwinding element-binding protein B) (DUE-B) (Gly-tRNA(Ala) deacylase) (Histidyl-tRNA synthase-related)	cytoplasm [GO:0005737]; nucleus [GO:0005634]	DNA duplex unwinding [GO:0032508]; DNA replication [GO:0006260]; tRNA metabolic process [GO:0006399]	D-tyrosyl-tRNA(Tyr) deacylase activity [GO:0051500]; DNA binding [GO:0003677]; metal ion binding [GO:0046872]; tRNA binding [GO:0000049]	Recovered	cluster 2	0	-1.17311	-0.480926	-0.457661																			Decrease	cluster 1	0	-0.325453	-0.520368	-0.724673
Q8TEM1	NUP210	Nuclear pore membrane glycoprotein 210 (Nuclear pore protein gp210) (Nuclear envelope pore membrane protein POM 210) (POM210) (Nucleoporin Nup210) (Pore membrane protein of 210 kDa)	endoplasmic reticulum membrane [GO:0005789]; membrane [GO:0016020]; nuclear envelope [GO:0005635]; nuclear membrane [GO:0031965]; nuclear pore [GO:0005643]	mRNA transport [GO:0051028]; nucleocytoplasmic transport [GO:0006913]; protein transport [GO:0015031]		Recovered	cluster 2	0	-1.77617	-0.731491	-0.834096																				cluster 9	0	0.753698	-0.875824	0.183041
Q8TEQ6	GEMIN5	Gem-associated protein 5 (Gemin5)	cytoplasm [GO:0005737]; cytosol [GO:0005829]; Gemini of coiled bodies [GO:0097504]; membrane [GO:0016020]; nuclear body [GO:0016604]; nucleoplasm [GO:0005654]; nucleus [GO:0005634]; SMN complex [GO:0032797]; SMN-Gemin2 complex [GO:0034718]; SMN-Sm protein complex [GO:0034719]	mRNA splicing, via spliceosome [GO:0000398]; protein-containing complex assembly [GO:0065003]; regulation of translation [GO:0006417]; spliceosomal snRNP assembly [GO:0000387]; translation [GO:0006412]	mRNA 3'-UTR binding [GO:0003730]; ribosome binding [GO:0043022]; RNA 7-methylguanosine cap binding [GO:0000340]; RNA binding [GO:0003723]; snRNA binding [GO:0017069]; U1 snRNA binding [GO:0030619]; U4 snRNA binding [GO:0030621]; U4atac snRNA binding [GO:0030622]	Recovered	cluster 2	0	-0.70381	-0.0838322	-0.0513127
Q8TEQ8	PIGO	GPI ethanolamine phosphate transferase 3 (EC 2.-.-.-) (Phosphatidylinositol-glycan biosynthesis class O protein) (PIG-O)	endoplasmic reticulum membrane [GO:0005789]; membrane [GO:0016020]	GPI anchor biosynthetic process [GO:0006506]	mannose-ethanolamine phosphotransferase activity [GO:0051377]	Recovered	cluster 2	0	-0.594696	-0.0912606	-0.0481083
Q8WXG6	MADD	MAP kinase-activating death domain protein (Differentially expressed in normal and neoplastic cells) (Insulinoma glucagonoma clone 20) (Rab3 GDP/GTP exchange factor) (RabGEF) (Rab3 GDP/GTP exchange protein) (Rab3GEP)	axon [GO:0030424]; cytoplasm [GO:0005737]; cytosol [GO:0005829]; membrane [GO:0016020]; plasma membrane [GO:0005886]	cell surface receptor signaling pathway [GO:0007166]; execution phase of apoptosis [GO:0097194]; positive regulation of MAPK cascade [GO:0043410]; regulation of apoptotic process [GO:0042981]; regulation of cell cycle [GO:0051726]; regulation of extrinsic apoptotic signaling pathway [GO:2001236]; regulation of extrinsic apoptotic signaling pathway via death domain receptors [GO:1902041]; regulati…	death receptor binding [GO:0005123]; guanyl-nucleotide exchange factor activity [GO:0005085]; protein kinase activator activity [GO:0030295]	Recovered	cluster 2	0	-1.08126	-0.112788	-0.0166209		cluster 2	0	-1.59318	-1.47731	-1.0657								cluster 7	0	-1.02665	-0.223063	-0.129309		cluster 3	0	-0.511923	-1.36452	-1.04907
Q8WXH0	SYNE2	Nesprin-2 (KASH domain-containing protein 2) (KASH2) (Nuclear envelope spectrin repeat protein 2) (Nucleus and actin connecting element protein) (Protein NUANCE) (Synaptic nuclear envelope protein 2) (Syne-2)	cytoplasm [GO:0005737]; extracellular exosome [GO:0070062]; filopodium membrane [GO:0031527]; focal adhesion [GO:0005925]; intermediate filament cytoskeleton [GO:0045111]; lamellipodium membrane [GO:0031258]; meiotic nuclear membrane microtubule tethering complex [GO:0034993]; mitochondrion [GO:0005739]; nuclear envelope [GO:0005635]; nuclear lumen [GO:0031981]; nuclear membrane [GO:0031965]; nuc…	centrosome localization [GO:0051642]; nuclear migration [GO:0007097]; nuclear migration along microfilament [GO:0031022]; nucleokinesis involved in cell motility in cerebral cortex radial glia guided migration [GO:0021817]; nucleus organization [GO:0006997]; positive regulation of cell migration [GO:0030335]; regulation of cilium assembly [GO:1902017]	actin binding [GO:0003779]; cytoskeleton-nuclear membrane anchor activity [GO:0140444]; kinesin binding [GO:0019894]	Recovered	cluster 2	0	-2.27592	-0.360331	-0.187227																				cluster 5	0	4.27315	-3.82852	-3.09927
Q8WY36	BBX	HMG box transcription factor BBX (Bobby sox homolog) (HMG box-containing protein 2)	chromatin [GO:0000785]; nucleus [GO:0005634]	bone development [GO:0060348]; regulation of transcription by RNA polymerase II [GO:0006357]	DNA-binding transcription factor activity, RNA polymerase II-specific [GO:0000981]; RNA polymerase II transcription regulatory region sequence-specific DNA binding [GO:0000977]; sequence-specific double-stranded DNA binding [GO:1990837]	Recovered	cluster 2	0	-1.07083	-0.492307	-0.185761
Q8WYP5	AHCTF1	Protein ELYS (Embryonic large molecule derived from yolk sac) (Protein MEL-28) (Putative AT-hook-containing transcription factor 1)	chromatin [GO:0000785]; cytosol [GO:0005829]; extracellular exosome [GO:0070062]; kinetochore [GO:0000776]; nuclear body [GO:0016604]; nuclear envelope [GO:0005635]; nuclear matrix [GO:0016363]; nuclear membrane [GO:0031965]; nuclear pore [GO:0005643]; nucleoplasm [GO:0005654]; nucleus [GO:0005634]	cell cycle [GO:0007049]; cell division [GO:0051301]; mRNA transport [GO:0051028]; nuclear pore complex assembly [GO:0051292]; nucleocytoplasmic transport [GO:0006913]; protein transport [GO:0015031]; regulation of cytokinesis [GO:0032465]	DNA binding [GO:0003677]	Recovered	cluster 2	0	-0.889377	-0.361837	-0.0860527
Q8WZA0	LZIC	Protein LZIC (Leucine zipper and CTNNBIP1 domain-containing protein) (Leucine zipper and ICAT homologous domain-containing protein)			beta-catenin binding [GO:0008013]	Recovered	cluster 2	0	-0.804976	-0.234061	-0.147407		cluster 2	0	-1.62494	-1.40145	-1.49115								cluster 1	0	2.64619	2.98572	1.88146		cluster 3	0	-0.819967	-1.16739	-1.34375
Q92572	AP3S1	AP-3 complex subunit sigma-1 (AP-3 complex subunit sigma-3A) (Adaptor-related protein complex 3 subunit sigma-1) (Clathrin-associated/assembly/adaptor protein, small 3) (Sigma-3A-adaptin) (Sigma3A-adaptin) (Sigma-adaptin 3a)	AP-3 adaptor complex [GO:0030123]; AP-type membrane coat adaptor complex [GO:0030119]; axon cytoplasm [GO:1904115]; cytoplasmic vesicle membrane [GO:0030659]; early endosome [GO:0005769]; Golgi apparatus [GO:0005794]; intracellular membrane-bounded organelle [GO:0043231]; presynapse [GO:0098793]; transport vesicle [GO:0030133]	anterograde axonal transport [GO:0008089]; anterograde synaptic vesicle transport [GO:0048490]; clathrin-coated vesicle cargo loading, AP-3-mediated [GO:0035654]; Golgi to vacuole transport [GO:0006896]; insulin receptor signaling pathway [GO:0008286]; intracellular protein transport [GO:0006886]; intracellular transport [GO:0046907]; melanosome assembly [GO:1903232]; platelet dense granule organ…		Recovered	cluster 2	0	-0.557484	-0.0464942	0.159303		cluster 2	0	-1.29498	-1.46742	-1.15756														cluster 3	0	-0.737499	-1.42093	-1.31686
Q92574	TSC1	Hamartin (Tuberous sclerosis 1 protein)	cell cortex [GO:0005938]; cytoplasm [GO:0005737]; cytosol [GO:0005829]; lamellipodium [GO:0030027]; lipid droplet [GO:0005811]; lysosomal membrane [GO:0005765]; membrane [GO:0016020]; nucleus [GO:0005634]; perinuclear region of cytoplasm [GO:0048471]; plasma membrane [GO:0005886]; postsynaptic density [GO:0014069]; protein folding chaperone complex [GO:0101031]; protein-containing complex [GO:003…	activation of GTPase activity [GO:0090630]; adaptive immune response [GO:0002250]; adult locomotory behavior [GO:0008344]; associative learning [GO:0008306]; cardiac muscle cell differentiation [GO:0055007]; cell population proliferation [GO:0008283]; cell projection organization [GO:0030030]; cell-matrix adhesion [GO:0007160]; cellular response to decreased oxygen levels [GO:0036294]; cellular r…	ATPase inhibitor activity [GO:0042030]; Hsp70 protein binding [GO:0030544]; Hsp90 protein binding [GO:0051879]; protein-folding chaperone binding [GO:0051087]	Recovered	cluster 2	0	-1.10754	-0.677923	-0.416785		cluster 3	0	-1.70796	-2.15459	-1.65025														cluster 3	0	-0.600423	-1.47667	-1.23346
Q92575	UBXN4	UBX domain-containing protein 4 (Erasin) (UBX domain-containing protein 2)	cytosol [GO:0005829]; endoplasmic reticulum [GO:0005783]; endoplasmic reticulum membrane [GO:0005789]; nuclear envelope [GO:0005635]	ERAD pathway [GO:0036503]; response to unfolded protein [GO:0006986]		Recovered	cluster 2	0	-0.904689	-0.691095	-0.458339
Q92576	PHF3	PHD finger protein 3	nucleus [GO:0005634]	DNA-templated transcription [GO:0006351]	metal ion binding [GO:0046872]	Recovered	cluster 2	0	-1.55742	-0.155946	0.328523
Q92597	NDRG1	Protein NDRG1 (Differentiation-related gene 1 protein) (DRG-1) (N-myc downstream-regulated gene 1 protein) (Nickel-specific induction protein Cap43) (Reducing agents and tunicamycin-responsive protein) (RTP) (Rit42)	adherens junction [GO:0005912]; centrosome [GO:0005813]; cytoplasm [GO:0005737]; cytosol [GO:0005829]; extracellular exosome [GO:0070062]; microtubule [GO:0005874]; microtubule cytoskeleton [GO:0015630]; nucleus [GO:0005634]; perinuclear region of cytoplasm [GO:0048471]; plasma membrane [GO:0005886]; recycling endosome membrane [GO:0055038]	cellular response to hypoxia [GO:0071456]; DNA damage response, signal transduction by p53 class mediator [GO:0030330]; mast cell activation [GO:0045576]; negative regulation of cell population proliferation [GO:0008285]; peripheral nervous system myelin maintenance [GO:0032287]; response to metal ion [GO:0010038]; signal transduction [GO:0007165]	cadherin binding [GO:0045296]; gamma-tubulin binding [GO:0043015]; microtubule binding [GO:0008017]; small GTPase binding [GO:0031267]	Recovered	cluster 2	0	-1.20908	-0.256328	-0.293344		cluster 2	0	-2.15615	-1.39876	-1.67997														cluster 3	0	-0.947073	-1.14243	-1.38662
Q92667	AKAP1	A-kinase anchor protein 1, mitochondrial (A-kinase anchor protein 149 kDa) (AKAP 149) (Dual specificity A-kinase-anchoring protein 1) (D-AKAP-1) (Protein kinase A-anchoring protein 1) (PRKA1) (Spermatid A-kinase anchor protein 84) (S-AKAP84)	cytosol [GO:0005829]; membrane [GO:0016020]; mitochondrial outer membrane [GO:0005741]; mitochondrion [GO:0005739]	antiviral innate immune response [GO:0140374]; apoptotic process [GO:0006915]	protein kinase A regulatory subunit binding [GO:0034237]; RNA binding [GO:0003723]	Recovered	cluster 2	0	-0.738668	-0.305296	-0.0502153														cluster 1	0	1.00398	1.66935	1.78503
Q92766	RREB1	Ras-responsive element-binding protein 1 (RREB-1) (Finger protein in nuclear bodies) (Raf-responsive zinc finger protein LZ321) (Zinc finger motif enhancer-binding protein 1) (Zep-1)	cytoplasm [GO:0005737]; extracellular exosome [GO:0070062]; fibrillar center [GO:0001650]; nuclear body [GO:0016604]; nuclear speck [GO:0016607]; nucleus [GO:0005634]	negative regulation of transcription by RNA polymerase II [GO:0000122]; positive regulation of brown fat cell differentiation [GO:0090336]; positive regulation of DNA-templated transcription [GO:0045893]; positive regulation of epithelial cell migration [GO:0010634]; positive regulation of lamellipodium morphogenesis [GO:2000394]; positive regulation of mammary gland epithelial cell proliferation…	DNA-binding transcription activator activity, RNA polymerase II-specific [GO:0001228]; metal ion binding [GO:0046872]; RNA polymerase II cis-regulatory region sequence-specific DNA binding [GO:0000978]; RNA polymerase II transcription regulatory region sequence-specific DNA binding [GO:0000977]	Recovered	cluster 2	0	-0.916692	-0.210297	0.115304
Q92844	TANK	TRAF family member-associated NF-kappa-B activator (TRAF-interacting protein) (I-TRAF)	cytoplasm [GO:0005737]; cytosol [GO:0005829]; protein-containing complex [GO:0032991]; serine/threonine protein kinase complex [GO:1902554]	canonical NF-kappaB signal transduction [GO:0007249]; cellular response to interleukin-1 [GO:0071347]; cellular response to ionizing radiation [GO:0071479]; cellular response to tumor necrosis factor [GO:0071356]; defense response to virus [GO:0051607]; DNA damage response [GO:0006974]; negative regulation of canonical NF-kappaB signal transduction [GO:0043124]; negative regulation of tumor necro…	deubiquitinase activator activity [GO:0035800]; metal ion binding [GO:0046872]; molecular adaptor activity [GO:0060090]; molecular function inhibitor activity [GO:0140678]; ubiquitin protein ligase binding [GO:0031625]	Recovered	cluster 2	0	-0.686319	-0.297968	-0.145259		cluster 2	0	-1.61549	-1.61853	-1.3222	Recovered	cluster 12	0	-0.656988	-0.539518	-0.00380434		cluster 2	0	-0.0293313	0.24155	-0.141454		cluster 3	0	-0.92917	-1.32056	-1.17694
Q92879	CELF1	CUGBP Elav-like family member 1 (CELF-1) (50 kDa nuclear polyadenylated RNA-binding protein) (Bruno-like protein 2) (CUG triplet repeat RNA-binding protein 1) (CUG-BP1) (CUG-BP- and ETR-3-like factor 1) (Deadenylation factor CUG-BP) (Embryo deadenylation element-binding protein homolog) (EDEN-BP homolog) (RNA-binding protein BRUNOL-2)	cytoplasm [GO:0005737]; cytoplasmic stress granule [GO:0010494]; membrane [GO:0016020]; nucleoplasm [GO:0005654]; nucleus [GO:0005634]; perinucleolar compartment [GO:0097356]; ribonucleoprotein complex [GO:1990904]	embryo development ending in birth or egg hatching [GO:0009792]; germ cell development [GO:0007281]; mRNA destabilization [GO:0061157]; mRNA processing [GO:0006397]; mRNA splice site recognition [GO:0006376]; negative regulation of cell population proliferation [GO:0008285]; negative regulation of gene expression [GO:0010629]; positive regulation of gene expression [GO:0010628]; post-transcriptio…	BRE binding [GO:0042835]; mRNA 3'-UTR binding [GO:0003730]; mRNA binding [GO:0003729]; mRNA regulatory element binding translation repressor activity [GO:0000900]; pre-mRNA binding [GO:0036002]; RNA binding [GO:0003723]	Recovered	cluster 2	0	-1.435	-0.102176	0.359992
Q92900	UPF1	Regulator of nonsense transcripts 1 (EC 3.6.4.12) (EC 3.6.4.13) (ATP-dependent helicase RENT1) (Nonsense mRNA reducing factor 1) (NORF1) (Up-frameshift suppressor 1 homolog) (hUpf1)	chromatin [GO:0000785]; chromosome, telomeric region [GO:0000781]; cytoplasm [GO:0005737]; cytosol [GO:0005829]; exon-exon junction complex [GO:0035145]; nucleoplasm [GO:0005654]; nucleus [GO:0005634]; P-body [GO:0000932]; perinuclear region of cytoplasm [GO:0048471]; supraspliceosomal complex [GO:0044530]	3'-UTR-mediated mRNA destabilization [GO:0061158]; cell cycle phase transition [GO:0044770]; cellular response to interleukin-1 [GO:0071347]; cellular response to lipopolysaccharide [GO:0071222]; DNA duplex unwinding [GO:0032508]; DNA repair [GO:0006281]; DNA replication [GO:0006260]; histone mRNA catabolic process [GO:0071044]; mRNA export from nucleus [GO:0006406]; nuclear-transcribed mRNA cata…	ATP binding [GO:0005524]; ATP hydrolysis activity [GO:0016887]; chromatin binding [GO:0003682]; double-stranded DNA helicase activity [GO:0036121]; helicase activity [GO:0004386]; protein-containing complex binding [GO:0044877]; RNA binding [GO:0003723]; RNA helicase activity [GO:0003724]; telomeric DNA binding [GO:0042162]; zinc ion binding [GO:0008270]	Recovered	cluster 2	0	-0.916876	-0.273478	-0.489585																				cluster 2	0	-3.77071	-2.67741	-0.383488
Q92990	GLMN	Glomulin (FK506-binding protein-associated protein) (FAP) (FKBP-associated protein)	Cul2-RING ubiquitin ligase complex [GO:0031462]; Cul3-RING ubiquitin ligase complex [GO:0031463]; Cul4A-RING E3 ubiquitin ligase complex [GO:0031464]; cullin-RING ubiquitin ligase complex [GO:0031461]; cytoplasm [GO:0005737]	cell surface receptor signaling pathway [GO:0007166]; epigenetic regulation of gene expression [GO:0040029]; muscle cell differentiation [GO:0042692]; negative regulation of cell population proliferation [GO:0008285]; negative regulation of T cell proliferation [GO:0042130]; neural tube closure [GO:0001843]; positive regulation of cytokine production [GO:0001819]; positive regulation of interleuk…	hepatocyte growth factor receptor binding [GO:0005171]; signaling receptor binding [GO:0005102]; ubiquitin protein ligase binding [GO:0031625]; ubiquitin-protein transferase inhibitor activity [GO:0055105]	Recovered	cluster 2	0	-1.19068	-1.00525	-0.490397
Q969Q5	RAB24	Ras-related protein Rab-24	autophagosome [GO:0005776]; cytosol [GO:0005829]; endomembrane system [GO:0012505]; endosome [GO:0005768]; Golgi apparatus [GO:0005794]; plasma membrane [GO:0005886]; secretory granule membrane [GO:0030667]	autophagy [GO:0006914]; intracellular protein transport [GO:0006886]	GTP binding [GO:0005525]; GTPase activity [GO:0003924]	Recovered	cluster 2	0	-0.788344	-0.235244	-0.403715
Q969V5	MUL1	Mitochondrial ubiquitin ligase activator of NFKB 1 (EC 2.3.2.27) (E3 SUMO-protein ligase MUL1) (E3 ubiquitin-protein ligase MUL1) (Growth inhibition and death E3 ligase) (Mitochondrial-anchored protein ligase) (Protein Hades) (Putative NF-kappa-B-activating protein 266) (RING finger protein 218) (RING-type E3 ubiquitin transferase NFKB 1)	axon [GO:0030424]; membrane [GO:0016020]; mitochondrial outer membrane [GO:0005741]; mitochondrion [GO:0005739]; neuronal cell body [GO:0043025]; peroxisome [GO:0005777]	activation of cysteine-type endopeptidase activity involved in apoptotic process [GO:0006919]; apoptotic process [GO:0006915]; cellular response to exogenous dsRNA [GO:0071360]; mitochondrial fission [GO:0000266]; mitochondrion localization [GO:0051646]; negative regulation of cell growth [GO:0030308]; negative regulation of chemokine (C-C motif) ligand 5 production [GO:0071650]; negative regulat…	identical protein binding [GO:0042802]; metal ion binding [GO:0046872]; p53 binding [GO:0002039]; SUMO transferase activity [GO:0019789]; ubiquitin protein ligase activity [GO:0061630]; ubiquitin protein ligase binding [GO:0031625]; ubiquitin-protein transferase activity [GO:0004842]	Recovered	cluster 2	0	-1.13621	-0.329476	-0.428818
Q96A49	SYAP1	Synapse-associated protein 1 (BSD domain-containing signal transducer and Akt interactor protein) (BSTA)	axon [GO:0030424]; cytoplasm [GO:0005737]; cytoplasmic side of plasma membrane [GO:0009898]; cytosol [GO:0005829]; dendrite [GO:0030425]; extracellular exosome [GO:0070062]; Golgi apparatus [GO:0005794]; growth cone [GO:0030426]; nucleoplasm [GO:0005654]; nucleus [GO:0005634]; perikaryon [GO:0043204]; perinuclear region of cytoplasm [GO:0048471]; postsynaptic membrane [GO:0045211]; presynaptic me…	cell differentiation [GO:0030154]; cellular response to epidermal growth factor stimulus [GO:0071364]; cellular response to insulin stimulus [GO:0032869]; cellular response to insulin-like growth factor stimulus [GO:1990314]; cellular response to platelet-derived growth factor stimulus [GO:0036120]; positive regulation of fat cell differentiation [GO:0045600]; positive regulation of protein serin…		Recovered	cluster 2	0	-1.07199	-0.630317	-0.321952		cluster 2	0	-1.32562	-1.42552	-1.22102		cluster 10	0	-0.805797	-0.888887	-0.106166		cluster 2	0	-0.266193	0.25857	-0.215786	Decrease	cluster 1	0	-0.253626	-0.795205	-0.899067
Q96AC1	FERMT2	Fermitin family homolog 2 (Kindlin-2) (Mitogen-inducible gene 2 protein) (MIG-2) (Pleckstrin homology domain-containing family C member 1) (PH domain-containing family C member 1)	adherens junction [GO:0005912]; cell cortex [GO:0005938]; cell junction [GO:0030054]; cell surface [GO:0009986]; cytoplasm [GO:0005737]; cytoplasmic side of plasma membrane [GO:0009898]; cytosol [GO:0005829]; extrinsic component of cytoplasmic side of plasma membrane [GO:0031234]; focal adhesion [GO:0005925]; I band [GO:0031674]; lamellipodium membrane [GO:0031258]; nucleoplasm [GO:0005654]; nucl…	adherens junction maintenance [GO:0034334]; cell adhesion [GO:0007155]; cell-matrix adhesion [GO:0007160]; focal adhesion assembly [GO:0048041]; integrin activation [GO:0033622]; integrin-mediated signaling pathway [GO:0007229]; limb development [GO:0060173]; negative regulation of fat cell differentiation [GO:0045599]; negative regulation of vascular permeability [GO:0043116]; positive regulatio…	actin binding [GO:0003779]; actin filament binding [GO:0051015]; integrin binding [GO:0005178]; phosphatidylinositol-3,4,5-trisphosphate binding [GO:0005547]; protein kinase binding [GO:0019901]; SMAD binding [GO:0046332]; type I transforming growth factor beta receptor binding [GO:0034713]	Recovered	cluster 2	0	-0.80995	-0.119565	-0.0986884		cluster 2	0	-1.57759	-1.68222	-1.46807		cluster 9	0	-0.206016	-0.526046	0.50393		cluster 2	0	-0.603935	0.406481	-0.602618		cluster 3	0	-0.767642	-1.56265	-1.36938
Q96BY7	ATG2B	Autophagy-related protein 2 homolog B	endoplasmic reticulum membrane [GO:0005789]; lipid droplet [GO:0005811]; phagophore [GO:0061908]; phagophore assembly site [GO:0000407]; phagophore assembly site membrane [GO:0034045]	autophagosome assembly [GO:0000045]; glycophagy [GO:0061723]; piecemeal microautophagy of the nucleus [GO:0034727]; reticulophagy [GO:0061709]	lipid transfer activity [GO:0120013]; phosphatidylinositol-3-phosphate binding [GO:0032266]; protein-membrane adaptor activity [GO:0043495]	Recovered	cluster 2	0	-1.10676	-0.550228	-0.11563
Q96C19	EFHD2	EF-hand domain-containing protein D2 (Swiprosin-1)	membrane raft [GO:0045121]		cadherin binding [GO:0045296]; calcium ion binding [GO:0005509]	Recovered	cluster 2	0	-0.857771	-0.433246	-0.279608		cluster 4	0	-1.56968	-2.15168	-1.22095		cluster 6	0	-0.578884	-0.933134	-0.480426		cluster 2	0	-0.278887	0.499888	0.200819		cluster 3	0	-0.711906	-1.71843	-0.941347
Q96CV9	OPTN	Optineurin (E3-14.7K-interacting protein) (FIP-2) (Huntingtin yeast partner L) (Huntingtin-interacting protein 7) (HIP-7) (Huntingtin-interacting protein L) (NEMO-related protein) (Optic neuropathy-inducing protein) (Transcription factor IIIA-interacting protein) (TFIIIA-IntP)	autophagosome [GO:0005776]; cytoplasm [GO:0005737]; cytosol [GO:0005829]; Golgi apparatus [GO:0005794]; Golgi membrane [GO:0000139]; nucleoplasm [GO:0005654]; nucleus [GO:0005634]; perinuclear region of cytoplasm [GO:0048471]; recycling endosome membrane [GO:0055038]; trans-Golgi network [GO:0005802]	autophagy [GO:0006914]; cell death [GO:0008219]; cellular response to unfolded protein [GO:0034620]; defense response to Gram-negative bacterium [GO:0050829]; Golgi organization [GO:0007030]; Golgi ribbon formation [GO:0090161]; Golgi to plasma membrane protein transport [GO:0043001]; innate immune response [GO:0045087]; negative regulation of canonical NF-kappaB signal transduction [GO:0043124];…	identical protein binding [GO:0042802]; K63-linked polyubiquitin modification-dependent protein binding [GO:0070530]; metal ion binding [GO:0046872]; polyubiquitin modification-dependent protein binding [GO:0031593]; protein-macromolecule adaptor activity [GO:0030674]	Recovered	cluster 2	0	-1.86935	-0.469962	-0.522017
Q96CW5	TUBGCP3	Gamma-tubulin complex component 3 (GCP-3) (hGCP3) (Gamma-ring complex protein 104 kDa) (h104p) (hGrip104) (Spindle pole body protein Spc98 homolog) (hSpc98)	centriole [GO:0005814]; centrosome [GO:0005813]; cytoplasm [GO:0005737]; cytosol [GO:0005829]; equatorial microtubule organizing center [GO:0000923]; gamma-tubulin complex [GO:0000930]; membrane [GO:0016020]; polar microtubule [GO:0005827]; spindle [GO:0005819]	cytoplasmic microtubule organization [GO:0031122]; meiotic cell cycle [GO:0051321]; microtubule nucleation [GO:0007020]; mitotic cell cycle [GO:0000278]; single fertilization [GO:0007338]; spindle assembly [GO:0051225]	gamma-tubulin binding [GO:0043015]; microtubule minus-end binding [GO:0051011]; structural constituent of cytoskeleton [GO:0005200]; structural molecule activity [GO:0005198]	Recovered	cluster 2	0	-1.48892	-0.911201	-0.725872																			Decrease	cluster 1	0	-0.582606	-0.869134	-1.25153
Q96DT6	ATG4C	Cysteine protease ATG4C (EC 3.4.22.-) (AUT-like 3 cysteine endopeptidase) (Autophagy-related cysteine endopeptidase 3) (Autophagin-3) (Autophagy-related protein 4 homolog C) (HsAPG4C)	cytoplasm [GO:0005737]	aggrephagy [GO:0035973]; autophagosome assembly [GO:0000045]; autophagy [GO:0006914]; mitophagy [GO:0000423]; piecemeal microautophagy of the nucleus [GO:0034727]; protein delipidation [GO:0051697]; protein processing [GO:0016485]; protein transport [GO:0015031]; proteolysis [GO:0006508]	cysteine-type endopeptidase activity [GO:0004197]; cysteine-type peptidase activity [GO:0008234]; protein-phosphatidylethanolamide deconjugating activity [GO:0019786]	Recovered	cluster 2	0	-0.999972	-0.266931	-0.296915		cluster 2	0	-1.86747	-1.46694	-1.44266														cluster 3	0	-0.8675	-1.20001	-1.14574
Q96E22	NUS1	Dehydrodolichyl diphosphate synthase complex subunit NUS1 (EC 2.5.1.87) (Cis-prenyltransferase subunit NgBR) (Nogo-B receptor) (NgBR) (Nuclear undecaprenyl pyrophosphate synthase 1 homolog)	dehydrodolichyl diphosphate synthase complex [GO:1904423]; endoplasmic reticulum membrane [GO:0005789]	angiogenesis [GO:0001525]; cell differentiation [GO:0030154]; cholesterol homeostasis [GO:0042632]; dolichol biosynthetic process [GO:0019408]; dolichyl diphosphate biosynthetic process [GO:0006489]; positive regulation of blood vessel endothelial cell migration [GO:0043536]; positive regulation of nitric-oxide synthase activity [GO:0051000]; protein glycosylation [GO:0006486]; protein mannosylat…	dehydrodolichyl diphosphate synthase activity [GO:0045547]; metal ion binding [GO:0046872]	Recovered	cluster 2	0	-1.38525	-0.15411	0.165036
Q96FF9	CDCA5	Sororin (Cell division cycle-associated protein 5) (p35)	chromatin [GO:0000785]; chromosome [GO:0005694]; chromosome, centromeric region [GO:0000775]; cytoplasm [GO:0005737]; cytosol [GO:0005829]; nucleoplasm [GO:0005654]; nucleus [GO:0005634]	cell division [GO:0051301]; double-strand break repair [GO:0006302]; mitotic cell cycle [GO:0000278]; mitotic chromosome condensation [GO:0007076]; mitotic metaphase chromosome alignment [GO:0007080]; mitotic sister chromatid cohesion [GO:0007064]; positive regulation of exit from mitosis [GO:0031536]	chromatin binding [GO:0003682]; protein-containing complex binding [GO:0044877]	Recovered	cluster 2	0	-0.905172	-0.708195	-0.474396
Q96FJ0	STAMBPL1	AMSH-like protease (AMSH-LP) (EC 3.4.19.-) (STAM-binding protein-like 1)	cytosol [GO:0005829]; endosome [GO:0005768]; membrane [GO:0016020]	cellular response to leucine [GO:0071233]; positive regulation of TORC1 signaling [GO:1904263]; proteolysis [GO:0006508]	K63-linked deubiquitinase activity [GO:0061578]; metal ion binding [GO:0046872]; metal-dependent deubiquitinase activity [GO:0140492]	Recovered	cluster 2	0	-0.888364	-0.108244	-0.0372083		cluster 2	0	-1.89007	-1.50777	-1.1672		cluster 8	0	0.0188447	-1.15238	-0.00249933		cluster 2	0	-0.907209	1.04414	-0.034709		cluster 3	0	-1.00171	-1.39953	-1.12999
Q96GA3	LTV1	Protein LTV1 homolog	cytosol [GO:0005829]; nucleoplasm [GO:0005654]; nucleus [GO:0005634]; preribosome, small subunit precursor [GO:0030688]	ribosomal small subunit biogenesis [GO:0042274]; ribosomal small subunit export from nucleus [GO:0000056]; ribosome biogenesis [GO:0042254]		Recovered	cluster 2	0	-1.15116	-0.694363	-0.169772
Q96HR8	NAF1	H/ACA ribonucleoprotein complex non-core subunit NAF1 (hNAF1)	cytoplasm [GO:0005737]; nucleoplasm [GO:0005654]; nucleus [GO:0005634]; sno(s)RNA-containing ribonucleoprotein complex [GO:0005732]	box H/ACA snoRNP assembly [GO:0000493]; positive regulation of telomerase activity [GO:0051973]; positive regulation of telomerase RNA localization to Cajal body [GO:1904874]; positive regulation of telomere maintenance via telomerase [GO:0032212]; positive regulation of telomere maintenance via telomere lengthening [GO:1904358]; ribosome biogenesis [GO:0042254]; RNA stabilization [GO:0043489]; s…	identical protein binding [GO:0042802]; RNA binding [GO:0003723]; telomerase RNA binding [GO:0070034]	Recovered	cluster 2	0	-0.625224	-0.0710639	0.147027																				cluster 3	0	-0.934481	-1.47098	-1.7144
Q96LZ7	RMDN2	Regulator of microtubule dynamics protein 2 (RMD-2) (hRMD-2) (Protein FAM82A1)	cytoplasm [GO:0005737]; cytosol [GO:0005829]; Golgi apparatus [GO:0005794]; membrane [GO:0016020]; mitochondrion [GO:0005739]; mitotic spindle [GO:0072686]; mitotic spindle pole [GO:0097431]; spindle microtubule [GO:0005876]		microtubule binding [GO:0008017]	Recovered	cluster 2	0	-1.20648	-0.336821	-0.147452
Q96MW1	CCDC43	Coiled-coil domain-containing protein 43	cytosol [GO:0005829]			Recovered	cluster 2	0	-0.753257	-0.427886	-0.281055		cluster 2	0	-1.48961	-1.51911	-1.28748								cluster 10	0	0.37927	0.0359368	0.0715492		cluster 3	0	-0.736357	-1.09122	-1.00643
Q96Q05	TRAPPC9	Trafficking protein particle complex subunit 9 (NIK- and IKBKB-binding protein) (Tularik gene 1 protein)	cytoplasm [GO:0005737]; cytosol [GO:0005829]; endoplasmic reticulum [GO:0005783]; trans-Golgi network [GO:0005802]; TRAPP complex [GO:0030008]; TRAPPII protein complex [GO:1990071]	cerebral cortex development [GO:0021987]; endoplasmic reticulum to Golgi vesicle-mediated transport [GO:0006888]; neuron differentiation [GO:0030182]; vesicle coating [GO:0006901]; vesicle tethering [GO:0099022]		Recovered	cluster 2	0	-0.419888	-0.154608	-0.160684		cluster 2	0	-2.21307	-1.29985	-1.61064														cluster 2	0	-1.79318	-1.14524	-1.44996
Q96RL7	VPS13A	Intermembrane lipid transfer protein VPS13A (Chorea-acanthocytosis protein) (Chorein) (Vacuolar protein sorting-associated protein 13A)	cytosol [GO:0005829]; endoplasmic reticulum membrane [GO:0005789]; endosome membrane [GO:0010008]; extrinsic component of membrane [GO:0019898]; Golgi apparatus [GO:0005794]; lipid droplet [GO:0005811]; lysosomal membrane [GO:0005765]; mitochondria-associated endoplasmic reticulum membrane [GO:0044233]; mitochondrial membrane [GO:0031966]; mitochondrial outer membrane [GO:0005741]; neuronal dense…	autophagy [GO:0006914]; flagellated sperm motility [GO:0030317]; Golgi to endosome transport [GO:0006895]; lipid transport [GO:0006869]; locomotory behavior [GO:0007626]; lysosomal protein catabolic process [GO:1905146]; nervous system development [GO:0007399]; protein localization [GO:0008104]; protein retention in Golgi apparatus [GO:0045053]; protein targeting to vacuole [GO:0006623]; social b…		Recovered	cluster 2	0	-1.27699	-0.406465	0.0527222
Q96TC7	RMDN3	Regulator of microtubule dynamics protein 3 (RMD-3) (hRMD-3) (Cerebral protein 10) (Protein FAM82A2) (Protein FAM82C) (Protein tyrosine phosphatase-interacting protein 51) (TCPTP-interacting protein 51)	cytoplasm [GO:0005737]; intercellular bridge [GO:0045171]; mitochondrial outer membrane [GO:0005741]; mitochondrion [GO:0005739]; mitotic spindle pole [GO:0097431]; nucleus [GO:0005634]; organelle membrane contact site [GO:0044232]; spindle microtubule [GO:0005876]	apoptotic process [GO:0006915]; cell differentiation [GO:0030154]; intracellular calcium ion homeostasis [GO:0006874]	microtubule binding [GO:0008017]	Recovered	cluster 2	0	-1.24653	-0.579282	-0.537309
Q99439	CNN2	Calponin-2 (Calponin H2, smooth muscle) (Neutral calponin)	actin cytoskeleton [GO:0015629]; cell-cell junction [GO:0005911]; cytoskeleton [GO:0005856]; extracellular region [GO:0005576]; focal adhesion [GO:0005925]; membrane [GO:0016020]; specific granule lumen [GO:0035580]; stress fiber [GO:0001725]; tertiary granule lumen [GO:1904724]	actin filament organization [GO:0007015]; actomyosin structure organization [GO:0031032]; cellular response to mechanical stimulus [GO:0071260]; cytoskeleton organization [GO:0007010]; establishment of localization in cell [GO:0051649]; hemopoiesis [GO:0030097]; macrophage migration [GO:1905517]; negative regulation of macrophage migration [GO:1905522]; negative regulation of phagocytosis [GO:005…	actin binding [GO:0003779]; actin filament binding [GO:0051015]; cadherin binding [GO:0045296]; calmodulin binding [GO:0005516]	Recovered	cluster 2	0	-1.03631	-0.800202	-0.357407		cluster 4	0	-1.24221	-1.35687	-0.974531							Decrease	cluster 6	0	-3.39764	-2.24655	-3.24459	Decrease	cluster 1	0	-0.205901	-0.556672	-0.617124
Q99460	PSMD1	26S proteasome non-ATPase regulatory subunit 1 (26S proteasome regulatory subunit RPN2) (26S proteasome regulatory subunit S1) (26S proteasome subunit p112)	azurophil granule lumen [GO:0035578]; cytosol [GO:0005829]; extracellular region [GO:0005576]; membrane [GO:0016020]; nucleoplasm [GO:0005654]; nucleus [GO:0005634]; proteasome accessory complex [GO:0022624]; proteasome complex [GO:0000502]; proteasome regulatory particle [GO:0005838]; proteasome regulatory particle, base subcomplex [GO:0008540]; proteasome storage granule [GO:0034515]	proteasome-mediated ubiquitin-dependent protein catabolic process [GO:0043161]; regulation of protein catabolic process [GO:0042176]	enzyme regulator activity [GO:0030234]; ubiquitin protein ligase binding [GO:0031625]	Recovered	cluster 2	0	-0.740407	-0.335891	-0.122534																				cluster 2	0	-1.92275	-1.53859	-1.37895
Q99614	TTC1	Tetratricopeptide repeat protein 1 (TPR repeat protein 1)	cytosol [GO:0005829]; peroxisomal membrane [GO:0005778]	protein folding [GO:0006457]	unfolded protein binding [GO:0051082]	Recovered	cluster 2	0	-0.91453	-0.403381	-0.264876		cluster 2	0	-1.2848	-0.964915	-1.00483								cluster 2	0	0.240717	2.38936	1.49169	Decrease	cluster 1	0	-0.370268	-0.561535	-0.73995
Q99633	PRPF18	Pre-mRNA-splicing factor 18 (PRP18 homolog) (hPRP18)	nuclear speck [GO:0016607]; nucleoplasm [GO:0005654]; nucleus [GO:0005634]; spliceosomal complex [GO:0005681]; U2-type post-spliceosomal complex [GO:0071021]; U4/U6 x U5 tri-snRNP complex [GO:0046540]; U5 snRNP [GO:0005682]	generation of catalytic spliceosome for second transesterification step [GO:0000350]; mRNA processing [GO:0006397]; RNA splicing [GO:0008380]		Recovered	cluster 2	0	-2.09931	-1.07248	-0.832855
Q99733	NAP1L4	Nucleosome assembly protein 1-like 4 (Nucleosome assembly protein 2) (NAP-2)	chromatin [GO:0000785]; cytoplasm [GO:0005737]; nucleus [GO:0005634]	nucleosome assembly [GO:0006334]	chromatin binding [GO:0003682]; histone binding [GO:0042393]; nucleosome binding [GO:0031491]; RNA binding [GO:0003723]; unfolded protein binding [GO:0051082]	Recovered	cluster 2	0	-1.44462	-0.633593	-0.14793		cluster 8	0	-0.129657	-1.99893	-0.208926							Increase	cluster 3	0	-0.298045	0.294995	0.445137		cluster 5	0	1.31497	-1.36534	-0.0609955
Q99961	SH3GL1	Endophilin-A2 (EEN fusion partner of MLL) (Endophilin-2) (Extra eleven-nineteen leukemia fusion gene protein) (EEN) (SH3 domain protein 2B) (SH3 domain-containing GRB2-like protein 1)	anchoring junction [GO:0070161]; cell projection [GO:0042995]; cytoplasm [GO:0005737]; cytosol [GO:0005829]; early endosome membrane [GO:0031901]; glutamatergic synapse [GO:0098978]; podosome [GO:0002102]; presynapse [GO:0098793]	central nervous system development [GO:0007417]; signal transduction [GO:0007165]; synaptic vesicle uncoating [GO:0016191]	cadherin binding [GO:0045296]; identical protein binding [GO:0042802]; lipid binding [GO:0008289]	Recovered	cluster 2	0	-0.817525	-0.230613	-0.0464641		cluster 3	0	-2.58147	-2.7741	-3.05006								cluster 1	0	0.318602	0.506706	0.793478		cluster 3	0	-1.76395	-2.54348	-3.00359
Q9BQ61	TRIR	Telomerase RNA component interacting RNase (EC 3.1.13.-) (Exoribonuclease TRIR)		rRNA catabolic process [GO:0016075]	3'-5' exonuclease activity [GO:0008408]; 5'-3' exonuclease activity [GO:0008409]; RNA binding [GO:0003723]	Recovered	cluster 2	0	-1.02575	-0.264973	-0.313679
Q9BRT9	GINS4	DNA replication complex GINS protein SLD5 (GINS complex subunit 4) [Cleaved into: DNA replication complex GINS protein SLD5, N-terminally processed]	CMG complex [GO:0071162]; cytoplasm [GO:0005737]; GINS complex [GO:0000811]; nucleoplasm [GO:0005654]; nucleus [GO:0005634]	DNA unwinding involved in DNA replication [GO:0006268]; double-strand break repair via break-induced replication [GO:0000727]; inner cell mass cell proliferation [GO:0001833]		Recovered	cluster 2	0	-1.3572	-0.165715	-0.0757863																			Decrease	cluster 1	0	0.585114	-0.811888	-1.3621
Q9BUJ2	HNRNPUL1	Heterogeneous nuclear ribonucleoprotein U-like protein 1 (Adenovirus early region 1B-associated protein 5) (E1B-55 kDa-associated protein 5) (E1B-AP5)	nucleoplasm [GO:0005654]; nucleus [GO:0005634]; ribonucleoprotein complex [GO:1990904]; synapse [GO:0045202]	response to virus [GO:0009615]; RNA processing [GO:0006396]	enzyme binding [GO:0019899]; RNA binding [GO:0003723]	Recovered	cluster 2	0	-1.06653	-0.092728	0.0135873
Q9BVJ6	UTP14A	U3 small nucleolar RNA-associated protein 14 homolog A (Antigen NY-CO-16) (Serologically defined colon cancer antigen 16)	cytosol [GO:0005829]; nucleolus [GO:0005730]; nucleoplasm [GO:0005654]; small-subunit processome [GO:0032040]	rRNA processing [GO:0006364]	RNA binding [GO:0003723]	Recovered	cluster 2	0	-1.37794	-0.419009	0.110204
Q9BWG6	SCNM1	Sodium channel modifier 1	nuclear speck [GO:0016607]; nucleus [GO:0005634]; spliceosomal complex [GO:0005681]	alternative mRNA splicing, via spliceosome [GO:0000380]; RNA splicing [GO:0008380]	enzyme binding [GO:0019899]; metal ion binding [GO:0046872]	Recovered	cluster 2	0	-1.67934	-1.02411	-0.316725
Q9BXK5	BCL2L13	Bcl-2-like protein 13 (Bcl2-L-13) (Bcl-rambo) (Protein Mil1)	membrane [GO:0016020]; mitochondrial membrane [GO:0031966]; mitochondrion [GO:0005739]; nucleus [GO:0005634]	activation of cysteine-type endopeptidase activity involved in apoptotic process [GO:0006919]; apoptotic process [GO:0006915]; regulation of apoptotic process [GO:0042981]	cysteine-type endopeptidase activator activity involved in apoptotic process [GO:0008656]	Recovered	cluster 2	0	-0.520193	-0.0311371	0.111694
Q9BY44	EIF2A	Eukaryotic translation initiation factor 2A (eIF-2A) (65 kDa eukaryotic translation initiation factor 2A) [Cleaved into: Eukaryotic translation initiation factor 2A, N-terminally processed]	blood microparticle [GO:0072562]; cytoplasm [GO:0005737]; cytosolic small ribosomal subunit [GO:0022627]; eukaryotic translation initiation factor 2 complex [GO:0005850]; extracellular space [GO:0005615]	positive regulation of signal transduction [GO:0009967]; regulation of translation [GO:0006417]; response to amino acid starvation [GO:1990928]; ribosome assembly [GO:0042255]; SREBP signaling pathway [GO:0032933]; translational initiation [GO:0006413]	cadherin binding [GO:0045296]; mRNA binding [GO:0003729]; ribosome binding [GO:0043022]; translation initiation factor activity [GO:0003743]; tRNA binding [GO:0000049]	Recovered	cluster 2	0	-0.466659	-0.375145	-0.166073		cluster 3	0	-1.48359	-2.05339	-2.38972													Decrease	cluster 1	0	-1.01693	-1.67825	-2.22364
Q9C0B7	TANGO6	Transport and Golgi organization protein 6 homolog (Transmembrane and coiled-coil domain-containing protein 7)	membrane [GO:0016020]	protein secretion [GO:0009306]		Recovered	cluster 2	0	-0.938345	-0.521092	-0.348179
Q9H019	MTFR1L	Mitochondrial fission regulator 1-like	mitochondrion [GO:0005739]	aerobic respiration [GO:0009060]; mitochondrial fission [GO:0000266]		Recovered	cluster 2	0	-0.624011	-0.19573	-0.252236														cluster 1	0	1.41383	2.23443	1.81156
Q9H0C8	ILKAP	Integrin-linked kinase-associated serine/threonine phosphatase 2C (ILKAP) (EC 3.1.3.16)	cytosol [GO:0005829]; nucleus [GO:0005634]	negative regulation of canonical NF-kappaB signal transduction [GO:0043124]; positive regulation of canonical NF-kappaB signal transduction [GO:0043123]; positive regulation of canonical Wnt signaling pathway [GO:0090263]	metal ion binding [GO:0046872]; myosin phosphatase activity [GO:0017018]	Recovered	cluster 2	0	-1.08731	-0.124396	0.0480799	Recovered	cluster 1	0	-2.07888	-1.67361	-1.13907								cluster 8	0	1.13091	-2.42712	2.06497		cluster 3	0	-0.991566	-1.54921	-1.18715
Q9H0L4	CSTF2T	Cleavage stimulation factor subunit 2 tau variant (CF-1 64 kDa subunit tau variant) (Cleavage stimulation factor 64 kDa subunit tau variant) (CSTF 64 kDa subunit tau variant) (TauCstF-64)	intracellular membrane-bounded organelle [GO:0043231]; mRNA cleavage and polyadenylation specificity factor complex [GO:0005847]; nucleoplasm [GO:0005654]	mRNA 3'-end processing [GO:0031124]	mRNA binding [GO:0003729]; RNA binding [GO:0003723]	Recovered	cluster 2	0	-1.08522	-0.434353	-0.223651
Q9H0P0	NT5C3A	Cytosolic 5'-nucleotidase 3A (EC 3.1.3.5) (7-methylguanosine phosphate-specific 5'-nucleotidase) (7-methylguanosine nucleotidase) (EC 3.1.3.91) (Cytosolic 5'-nucleotidase 3) (Cytosolic 5'-nucleotidase III) (cN-III) (Pyrimidine 5'-nucleotidase 1) (P5'N-1) (P5N-1) (PN-I) (Uridine 5'-monophosphate hydrolase 1) (p36)	cytoplasm [GO:0005737]; cytosol [GO:0005829]; endoplasmic reticulum [GO:0005783]; nuclear body [GO:0016604]; nucleoplasm [GO:0005654]	defense response to virus [GO:0051607]; nucleotide metabolic process [GO:0009117]; pyrimidine nucleoside metabolic process [GO:0006213]	5'-nucleotidase activity [GO:0008253]; magnesium ion binding [GO:0000287]; nucleotide binding [GO:0000166]; tRNA 2'-phosphotransferase activity [GO:0000215]; XMP 5'-nucleosidase activity [GO:0106411]	Recovered	cluster 2	0	-1.2983	-0.579952	-0.248687
Q9H1A4	ANAPC1	Anaphase-promoting complex subunit 1 (APC1) (Cyclosome subunit 1) (Mitotic checkpoint regulator) (Testis-specific gene 24 protein)	anaphase-promoting complex [GO:0005680]; cytosol [GO:0005829]; nucleoplasm [GO:0005654]	anaphase-promoting complex-dependent catabolic process [GO:0031145]; cell division [GO:0051301]; metaphase/anaphase transition of mitotic cell cycle [GO:0007091]; protein K11-linked ubiquitination [GO:0070979]; regulation of meiotic cell cycle [GO:0051445]; regulation of mitotic cell cycle [GO:0007346]	molecular adaptor activity [GO:0060090]	Recovered	cluster 2	0	-0.778398	-0.261549	-0.358706		cluster 3	0	-2.14282	-2.04518	-2.26492														cluster 3	0	-1.36443	-1.78363	-1.90621
Q9H223	EHD4	EH domain-containing protein 4 (Hepatocellular carcinoma-associated protein 10/11) (PAST homolog 4)	clathrin coat of coated pit [GO:0030132]; cytoplasm [GO:0005737]; early endosome [GO:0005769]; early endosome membrane [GO:0031901]; endocytic vesicle [GO:0030139]; endoplasmic reticulum [GO:0005783]; extracellular exosome [GO:0070062]; membrane [GO:0016020]; nucleus [GO:0005634]; perinuclear region of cytoplasm [GO:0048471]; plasma membrane [GO:0005886]; recycling endosome membrane [GO:0055038]	cellular response to growth factor stimulus [GO:0071363]; cilium assembly [GO:0060271]; endocytic recycling [GO:0032456]; endocytosis [GO:0006897]; pinocytosis [GO:0006907]; positive regulation of peptidyl-tyrosine phosphorylation [GO:0050731]; protein homooligomerization [GO:0051260]; protein localization to plasma membrane [GO:0072659]; regulation of endocytosis [GO:0030100]	ATP binding [GO:0005524]; cadherin binding [GO:0045296]; calcium ion binding [GO:0005509]; GTP binding [GO:0005525]; nucleic acid binding [GO:0003676]	Recovered	cluster 2	0	-2.13838	-0.909816	-0.939991		cluster 2	0	-1.63669	-1.42582	-1.099														cluster 5	0	0.501683	-0.516005	-0.159007
Q9H267	VPS33B	Vacuolar protein sorting-associated protein 33B (hVPS33B)	clathrin-coated vesicle [GO:0030136]; CORVET complex [GO:0033263]; cytoplasm [GO:0005737]; cytosol [GO:0005829]; early endosome membrane [GO:0031901]; endosome [GO:0005768]; endosome membrane [GO:0010008]; Golgi apparatus [GO:0005794]; HOPS complex [GO:0030897]; late endosome [GO:0005770]; late endosome membrane [GO:0031902]; lysosomal membrane [GO:0005765]; lysosome [GO:0005764]; perinuclear reg…	collagen fibril organization [GO:0030199]; collagen metabolic process [GO:0032963]; endosome organization [GO:0007032]; intracellular protein transport [GO:0006886]; intracellular transport [GO:0046907]; lysosome localization [GO:0032418]; megakaryocyte development [GO:0035855]; melanosome localization [GO:0032400]; membrane fusion [GO:0061025]; peptidyl-lysine hydroxylation [GO:0017185]; phagoso…	protein-containing complex binding [GO:0044877]	Recovered	cluster 2	0	-0.924729	-0.26865	-0.116073		cluster 13	0	-1.38217	1.2726	-0.791666														cluster 10	0	-0.457444	1.54125	-0.675593
Q9H2P9	DPH5	Diphthine methyl ester synthase (EC 2.1.1.314) (Diphthamide biosynthesis methyltransferase)	cytosol [GO:0005829]	methylation [GO:0032259]; protein histidyl modification to diphthamide [GO:0017183]	diphthine methyl ester synthase activity [GO:0141133]; diphthine synthase activity [GO:0004164]	Recovered	cluster 2	0	-0.534037	-0.0112259	0.131119		cluster 2	0	-2.05356	-1.81272	-1.86588														cluster 3	0	-1.51953	-1.80149	-1.997
Q9H488	POFUT1	GDP-fucose protein O-fucosyltransferase 1 (EC 2.4.1.221) (Peptide-O-fucosyltransferase 1) (O-FucT-1)	endoplasmic reticulum [GO:0005783]; membrane [GO:0016020]	angiogenesis [GO:0001525]; fucose metabolic process [GO:0006004]; heart development [GO:0007507]; nervous system development [GO:0007399]; Notch signaling pathway [GO:0007219]; O-glycan processing [GO:0016266]; protein O-linked fucosylation [GO:0036066]; protein O-linked glycosylation [GO:0006493]; regulation of DNA-templated transcription [GO:0006355]; regulation of Notch signaling pathway [GO:0…	fucosyltransferase activity [GO:0008417]; peptide-O-fucosyltransferase activity [GO:0046922]	Recovered	cluster 2	0	-1.19487	-1.03886	-0.227821
Q9H4G0	EPB41L1	Band 4.1-like protein 1 (Erythrocyte membrane protein band 4.1-like 1) (Neuronal protein 4.1) (4.1N)	cytoskeleton [GO:0005856]; cytosol [GO:0005829]; plasma membrane [GO:0005886]	actomyosin structure organization [GO:0031032]; cortical actin cytoskeleton organization [GO:0030866]	actin binding [GO:0003779]; structural molecule activity [GO:0005198]	Recovered	cluster 2	0	-0.706678	-0.105641	-0.210318		cluster 4	0	-1.99708	-3.00096	-1.89924		cluster 13	0	1.17044	0.626757	1.43465		cluster 4	0	-1.87711	-0.732398	-1.64496		cluster 3	0	-1.29041	-2.89532	-1.68892
Q9H7E2	TDRD3	Tudor domain-containing protein 3	cytosol [GO:0005829]; DNA topoisomerase III-beta-TDRD3 complex [GO:0140225]; Golgi apparatus [GO:0005794]; nucleoplasm [GO:0005654]; nucleus [GO:0005634]	chromatin organization [GO:0006325]; DNA topological change [GO:0006265]	chromatin binding [GO:0003682]; methylated histone binding [GO:0035064]; RNA binding [GO:0003723]; transcription coactivator activity [GO:0003713]	Recovered	cluster 2	0	-2.01225	-1.21374	-0.97032
Q9H9A6	LRRC40	Leucine-rich repeat-containing protein 40	membrane [GO:0016020]	signal transduction [GO:0007165]		Recovered	cluster 2	0	-0.902492	-0.228482	-0.233639	Recovered	cluster 1	0	-2.67872	-1.71628	-1.4575														cluster 2	0	-1.77623	-1.4878	-1.22386
Q9HD15	SRA1	Steroid receptor RNA activator 1 (Steroid receptor RNA activator protein) (SRAP)	cytoplasm [GO:0005737]; cytosol [GO:0005829]; intercellular bridge [GO:0045171]; microtubule cytoskeleton [GO:0015630]; nucleoplasm [GO:0005654]; nucleus [GO:0005634]; plasma membrane [GO:0005886]; ribonucleoprotein complex [GO:1990904]; SCAR complex [GO:0031209]	apoptotic process [GO:0006915]; cell differentiation [GO:0030154]; cellular response to estrogen stimulus [GO:0071391]; negative regulation of myoblast differentiation [GO:0045662]; regulation of apoptotic process [GO:0042981]; regulation of mitotic cell cycle [GO:0007346]	nuclear receptor coactivator activity [GO:0030374]; steroid receptor RNA activator RNA binding [GO:0002153]; transcription coactivator activity [GO:0003713]	Recovered	cluster 2	0	-1.52068	-0.960535	-0.535777																				cluster 3	0	-0.899533	-1.29903	-1.58236
Q9NP73	ALG13	UDP-N-acetylglucosamine transferase subunit ALG13 (EC 2.4.1.141) (Asparagine-linked glycosylation 13 homolog) (Glycosyltransferase 28 domain-containing protein 1)	endoplasmic reticulum [GO:0005783]; endoplasmic reticulum membrane [GO:0005789]; UDP-N-acetylglucosamine transferase complex [GO:0043541]	dolichol-linked oligosaccharide biosynthetic process [GO:0006488]; proteolysis [GO:0006508]	cysteine-type deubiquitinase activity [GO:0004843]; N-acetylglucosaminyldiphosphodolichol N-acetylglucosaminyltransferase activity [GO:0004577]; RNA binding [GO:0003723]	Recovered	cluster 2	0	-2.16413	-1.71203	-1.03965
Q9NP74	PALMD	Palmdelphin (Paralemmin-like protein)	cytoplasm [GO:0005737]; dendritic spine [GO:0043197]; membrane [GO:0016020]	regulation of cell shape [GO:0008360]		Recovered	cluster 2	0	-0.883288	-0.269817	-0.406408
Q9NPD8	UBE2T	Ubiquitin-conjugating enzyme E2 T (EC 2.3.2.23) (Cell proliferation-inducing gene 50 protein) (E2 ubiquitin-conjugating enzyme T) (Ubiquitin carrier protein T) (Ubiquitin-protein ligase T)	nucleolus [GO:0005730]; nucleoplasm [GO:0005654]; nucleus [GO:0005634]	DNA damage response [GO:0006974]; DNA repair [GO:0006281]; protein autoubiquitination [GO:0051865]; protein K11-linked ubiquitination [GO:0070979]; protein K27-linked ubiquitination [GO:0044314]; protein K29-linked ubiquitination [GO:0035519]; protein K48-linked ubiquitination [GO:0070936]; protein K6-linked ubiquitination [GO:0085020]; protein K63-linked ubiquitination [GO:0070534]; protein mono…	ATP binding [GO:0005524]; chromatin binding [GO:0003682]; ubiquitin conjugating enzyme activity [GO:0061631]; ubiquitin protein ligase binding [GO:0031625]; ubiquitin-protein transferase activity [GO:0004842]	Recovered	cluster 2	0	-1.40643	-0.755832	-0.146288
Q9NPQ8	RIC8A	Synembryn-A (Protein Ric-8A)	cytoplasm [GO:0005737]; plasma membrane [GO:0005886]	adenylate cyclase-inhibiting G protein-coupled receptor signaling pathway [GO:0007193]; basement membrane organization [GO:0071711]; cell migration involved in gastrulation [GO:0042074]; cell-cell adhesion involved in gastrulation [GO:0070586]; G protein-coupled receptor signaling pathway [GO:0007186]; in utero embryonic development [GO:0001701]; vasculature development [GO:0001944]; visual learn…	G-protein alpha-subunit binding [GO:0001965]; guanyl-nucleotide exchange factor activity [GO:0005085]	Recovered	cluster 2	0	-1.37367	-0.638641	-0.372655
Q9NQ48	LZTFL1	Leucine zipper transcription factor-like protein 1	cilium [GO:0005929]; cytoplasm [GO:0005737]; cytosol [GO:0005829]; manchette [GO:0002177]	flagellated sperm motility [GO:0030317]; negative regulation of protein localization to ciliary membrane [GO:1903568]; negative regulation of protein localization to cilium [GO:1903565]; spermatogenesis [GO:0007283]	identical protein binding [GO:0042802]; protein-containing complex binding [GO:0044877]	Recovered	cluster 2	0	-0.723476	-0.0603531	0.152604		cluster 4	0	-1.36348	-1.46204	-0.675239														cluster 3	0	-0.639999	-1.40169	-0.827842
Q9NR46	SH3GLB2	Endophilin-B2 (SH3 domain-containing GRB2-like protein B2)	cytoplasm [GO:0005737]; cytosol [GO:0005829]; membrane [GO:0016020]; nucleoplasm [GO:0005654]	membrane organization [GO:0061024]	cadherin binding [GO:0045296]; identical protein binding [GO:0042802]	Recovered	cluster 2	0	-1.51111	-1.01294	-0.283908																			Decrease	cluster 1	0	-0.354744	-1.54271	-1.33623
Q9NRA8	EIF4ENIF1	Eukaryotic translation initiation factor 4E transporter (4E-T) (eIF4E transporter) (Eukaryotic translation initiation factor 4E nuclear import factor 1)	cytoplasm [GO:0005737]; cytosol [GO:0005829]; intracellular membrane-bounded organelle [GO:0043231]; membrane [GO:0016020]; nuclear speck [GO:0016607]; nucleus [GO:0005634]; P-body [GO:0000932]; PML body [GO:0016605]	miRNA-mediated gene silencing by inhibition of translation [GO:0035278]; mRNA stabilization [GO:0048255]; negative regulation of deadenylation-dependent decapping of nuclear-transcribed mRNA [GO:0106289]; negative regulation of neuron differentiation [GO:0045665]; negative regulation of translation [GO:0017148]; neuron differentiation [GO:0030182]; P-body assembly [GO:0033962]; positive regulatio…	kinase binding [GO:0019900]; mRNA binding [GO:0003729]; nuclear export signal receptor activity [GO:0005049]; RNA binding [GO:0003723]	Recovered	cluster 2	0	-1.00882	-0.584389	-0.154296																			Decrease	cluster 1	0	-0.359652	-0.400674	-0.593903
Q9NRL3	STRN4	Striatin-4 (Zinedin)	cytoplasm [GO:0005737]; dendrite [GO:0030425]; dendritic spine [GO:0043197]; FAR/SIN/STRIPAK complex [GO:0090443]; membrane [GO:0016020]		armadillo repeat domain binding [GO:0070016]; calmodulin binding [GO:0005516]; protein phosphatase 2A binding [GO:0051721]; protein-containing complex binding [GO:0044877]	Recovered	cluster 2	0	-1.85208	-0.456656	-0.412007
Q9NRY5	FAM114A2	Protein FAM114A2			purine nucleotide binding [GO:0017076]	Recovered	cluster 2	0	-0.627321	-0.265461	-0.230302		cluster 4	0	-1.28256	-1.44837	-0.869538								cluster 8	0	0.903565	0.154891	2.57148		cluster 3	0	-0.655237	-1.18291	-0.639236
Q9NS69	TOMM22	Mitochondrial import receptor subunit TOM22 homolog (hTom22) (1C9-2) (Translocase of outer membrane 22 kDa subunit homolog)	membrane [GO:0016020]; mitochondrial outer membrane [GO:0005741]; mitochondrial outer membrane translocase complex [GO:0005742]; mitochondrion [GO:0005739]; TOM complex [GO:0140596]	protein insertion into mitochondrial outer membrane [GO:0045040]; protein targeting to mitochondrion [GO:0006626]	mitochondrion targeting sequence binding [GO:0030943]; protein transmembrane transporter activity [GO:0008320]	Recovered	cluster 2	0	-1.81351	-0.825067	-0.791577
Q9NT62	ATG3	Ubiquitin-like-conjugating enzyme ATG3 (EC 2.3.2.-) (Autophagy-related protein 3) (APG3-like) (hApg3) (Protein PC3-96)	Atg12-Atg5-Atg16 complex [GO:0034274]; cytoplasm [GO:0005737]; cytosol [GO:0005829]; phagophore assembly site [GO:0000407]	autophagosome assembly [GO:0000045]; glycophagy [GO:0061723]; mitochondrial fragmentation involved in apoptotic process [GO:0043653]; negative regulation of phagocytosis [GO:0050765]; nucleophagy [GO:0044804]; protein targeting to membrane [GO:0006612]; protein transport [GO:0015031]; protein ubiquitination [GO:0016567]; regulation of cilium assembly [GO:1902017]	Atg12 transferase activity [GO:0019777]; Atg8-family conjugating enzyme activity [GO:0141046]; Atg8-family ligase activity [GO:0019776]; enzyme binding [GO:0019899]; ubiquitin-like protein transferase activity [GO:0019787]	Recovered	cluster 2	0	-0.990584	-0.473811	-0.415088		cluster 2	0	-1.58169	-1.40815	-1.13669							Decrease	cluster 6	0	-0.980887	-0.947217	-1.39577		cluster 3	0	-0.591103	-0.934338	-0.721604
Q9NUD5	ZCCHC3	Zinc finger CCHC domain-containing protein 3	cytoplasm [GO:0005737]	activation of innate immune response [GO:0002218]; cellular response to exogenous dsRNA [GO:0071360]; defense response to virus [GO:0051607]; detection of virus [GO:0009597]; innate immune response [GO:0045087]; positive regulation of RIG-I signaling pathway [GO:1900246]; positive regulation of type I interferon production [GO:0032481]	double-stranded DNA binding [GO:0003690]; RNA binding [GO:0003723]; zinc ion binding [GO:0008270]	Recovered	cluster 2	0	-0.563455	-0.0423728	0.120877
Q9NVH0	EXD2	Exonuclease 3'-5' domain-containing protein 2 (EC 3.1.11.1) (3'-5' exoribonuclease EXD2) (EC 3.1.13.-) (Exonuclease 3'-5' domain-like-containing protein 2)	cytoplasm [GO:0005737]; intermediate filament cytoskeleton [GO:0045111]; mitochondrial matrix [GO:0005759]; mitochondrial outer membrane [GO:0005741]; mitochondrion [GO:0005739]; nucleus [GO:0005634]; site of DNA damage [GO:0090734]	DNA double-strand break processing [GO:0000729]; double-strand break repair [GO:0006302]; double-strand break repair via homologous recombination [GO:0000724]; nucleic acid metabolic process [GO:0090304]; replication fork processing [GO:0031297]	3'-5' exonuclease activity [GO:0008408]; 3'-5'-DNA exonuclease activity [GO:0008296]; 3'-5'-RNA exonuclease activity [GO:0000175]; magnesium ion binding [GO:0000287]; manganese ion binding [GO:0030145]; nucleic acid binding [GO:0003676]; protein homodimerization activity [GO:0042803]; single-stranded DNA 3'-5' DNA exonuclease activity [GO:0008310]	Recovered	cluster 2	0	-0.790755	-0.279115	-0.132001
Q9NVP1	DDX18	ATP-dependent RNA helicase DDX18 (EC 3.6.4.13) (DEAD box protein 18) (Myc-regulated DEAD box protein) (MrDb)	chromosome [GO:0005694]; membrane [GO:0016020]; nucleolus [GO:0005730]	maturation of LSU-rRNA from tricistronic rRNA transcript (SSU-rRNA, 5.8S rRNA, LSU-rRNA) [GO:0000463]	ATP binding [GO:0005524]; ATP hydrolysis activity [GO:0016887]; RNA binding [GO:0003723]; RNA helicase activity [GO:0003724]	Recovered	cluster 2	0	-1.17346	-0.777162	-0.402034
Q9NWS0	PIH1D1	PIH1 domain-containing protein 1 (Nucleolar protein 17 homolog)	cytoplasm [GO:0005737]; nucleolus [GO:0005730]; nucleus [GO:0005634]; pre-snoRNP complex [GO:0070761]; R2TP complex [GO:0097255]; ribonucleoprotein complex [GO:1990904]; RPAP3/R2TP/prefoldin-like complex [GO:1990062]	box C/D snoRNP assembly [GO:0000492]; chromatin remodeling [GO:0006338]; epithelial cell differentiation [GO:0030855]; negative regulation of cysteine-type endopeptidase activity involved in apoptotic signaling pathway [GO:2001268]; positive regulation of glucose mediated signaling pathway [GO:1902661]; positive regulation of protein serine/threonine kinase activity [GO:0071902]; positive regulat…	ATPase binding [GO:0051117]; histone binding [GO:0042393]; histone reader activity [GO:0140566]; phosphoprotein binding [GO:0051219]; protein kinase binding [GO:0019901]	Recovered	cluster 2	0	-0.235565	-0.101325	-0.111254
Q9NWZ3	IRAK4	Interleukin-1 receptor-associated kinase 4 (IRAK-4) (EC 2.7.11.1) (Renal carcinoma antigen NY-REN-64)	cell surface [GO:0009986]; cytoplasm [GO:0005737]; cytosol [GO:0005829]; endosome membrane [GO:0010008]; extracellular space [GO:0005615]; extrinsic component of plasma membrane [GO:0019897]; nucleus [GO:0005634]; plasma membrane [GO:0005886]	cellular response to lipopolysaccharide [GO:0071222]; cytokine-mediated signaling pathway [GO:0019221]; innate immune response [GO:0045087]; interleukin-1-mediated signaling pathway [GO:0070498]; interleukin-33-mediated signaling pathway [GO:0038172]; intracellular signal transduction [GO:0035556]; JNK cascade [GO:0007254]; MyD88-dependent toll-like receptor signaling pathway [GO:0002755]; neutro…	ATP binding [GO:0005524]; interleukin-1 receptor binding [GO:0005149]; kinase activity [GO:0016301]; magnesium ion binding [GO:0000287]; protein kinase binding [GO:0019901]; protein serine kinase activity [GO:0106310]; protein serine/threonine kinase activity [GO:0004674]	Recovered	cluster 2	0	-0.887954	-0.372173	-0.145257		cluster 2	0	-2.82298	-2.0406	-1.7099														cluster 2	0	-1.93502	-1.66842	-1.56464
Q9NXC5	MIOS	GATOR2 complex protein MIOS (Missing oocyte meiosis regulator homolog)	cell junction [GO:0030054]; cytoplasm [GO:0005737]; cytosol [GO:0005829]; GATOR2 complex [GO:0061700]; lysosomal membrane [GO:0005765]; nucleoplasm [GO:0005654]	cellular response to amino acid starvation [GO:0034198]; cellular response to nutrient levels [GO:0031669]; central nervous system myelin formation [GO:0032289]; negative regulation of TORC1 signaling [GO:1904262]; oligodendrocyte differentiation [GO:0048709]; oligodendrocyte progenitor proliferation [GO:0070444]; positive regulation of TOR signaling [GO:0032008]; positive regulation of TORC1 sig…	metal ion binding [GO:0046872]	Recovered	cluster 2	0	-1.29697	-0.664192	-0.0926227		cluster 4	0	-1.31493	-1.44477	-0.879972													Decrease	cluster 1	0	-0.0179615	-0.780575	-0.787349
Q9NXV6	CDKN2AIP	CDKN2A-interacting protein (Collaborator of ARF)	granular component [GO:0001652]; nucleolus [GO:0005730]; nucleoplasm [GO:0005654]	DNA damage response [GO:0006974]; negative regulation of cell growth [GO:0030308]; positive regulation of cell growth [GO:0030307]; positive regulation of signal transduction [GO:0009967]; regulation of protein stability [GO:0031647]	p53 binding [GO:0002039]; RNA binding [GO:0003723]	Recovered	cluster 2	0	-0.651514	-0.10132	0.129994		cluster 2	0	-1.75301	-1.69073	-1.76674							Increase	cluster 3	0	-0.0289026	0.461711	1.30432		cluster 3	0	-1.1015	-1.58941	-1.89673
Q9NZ52	GGA3	ADP-ribosylation factor-binding protein GGA3 (Golgi-localized, gamma ear-containing, ARF-binding protein 3)	early endosome membrane [GO:0031901]; endosome membrane [GO:0010008]; Golgi apparatus [GO:0005794]; lysosome [GO:0005764]; protein-containing complex [GO:0032991]; recycling endosome membrane [GO:0055038]; trans-Golgi network [GO:0005802]	Golgi to plasma membrane protein transport [GO:0043001]; Golgi to plasma membrane transport [GO:0006893]; intracellular protein transport [GO:0006886]; negative regulation of amyloid-beta formation [GO:1902430]; positive regulation of protein catabolic process [GO:0045732]; protein catabolic process [GO:0030163]; protein destabilization [GO:0031648]; protein localization to cell surface [GO:00343…	phosphatidylinositol binding [GO:0035091]; protein-containing complex binding [GO:0044877]; small GTPase binding [GO:0031267]; ubiquitin binding [GO:0043130]	Recovered	cluster 2	0	-1.33235	-0.338417	-0.518429		cluster 2	0	-1.24609	-1.02155	-0.756571														cluster 5	0	0.0862561	-0.683137	-0.238142
Q9P287	BCCIP	BRCA2 and CDKN1A-interacting protein (P21- and CDK-associated protein 1) (Protein TOK-1)	centriole [GO:0005814]; centrosome [GO:0005813]; cytosol [GO:0005829]; mitotic spindle pole [GO:0097431]; nuclear cyclin-dependent protein kinase holoenzyme complex [GO:0019908]; nucleoplasm [GO:0005654]; nucleus [GO:0005634]	DNA repair [GO:0006281]; establishment of mitotic spindle orientation [GO:0000132]; microtubule anchoring [GO:0034453]; microtubule cytoskeleton organization [GO:0000226]; mitotic spindle assembly [GO:0090307]; mitotic spindle organization [GO:0007052]; neuroendocrine cell differentiation [GO:0061101]; regulation of cyclin-dependent protein serine/threonine kinase activity [GO:0000079]	kinase regulator activity [GO:0019207]; RNA binding [GO:0003723]; tubulin binding [GO:0015631]	Recovered	cluster 2	0	-1.27576	-0.305984	-0.45469
Q9UBB9	TFIP11	Tuftelin-interacting protein 11 (Septin and tuftelin-interacting protein 1) (STIP-1)	catalytic step 2 spliceosome [GO:0071013]; chromosome, telomeric region [GO:0000781]; cytoplasm [GO:0005737]; extracellular matrix [GO:0031012]; nuclear speck [GO:0016607]; nucleolus [GO:0005730]; nucleoplasm [GO:0005654]; spliceosomal complex [GO:0005681]; U2-type post-mRNA release spliceosomal complex [GO:0071008]	biomineral tissue development [GO:0031214]; mRNA splicing, via spliceosome [GO:0000398]; negative regulation of DNA ligase activity [GO:1904876]; negative regulation of double-strand break repair via nonhomologous end joining [GO:2001033]; negative regulation of protein binding [GO:0032091]; negative regulation of protein-containing complex assembly [GO:0031333]; protection from non-homologous en…	nucleic acid binding [GO:0003676]	Recovered	cluster 2	0	-1.51787	-0.884268	-0.704952																				cluster 9	0	0.0807303	-1.20709	2.35575
Q9UBC2	EPS15L1	Epidermal growth factor receptor substrate 15-like 1 (Eps15-related protein) (Eps15R)	clathrin coat of coated pit [GO:0030132]; cytoplasm [GO:0005737]; cytosol [GO:0005829]; membrane [GO:0016020]; nucleus [GO:0005634]; plasma membrane [GO:0005886]	endocytosis [GO:0006897]; endosomal transport [GO:0016197]	cadherin binding [GO:0045296]; calcium ion binding [GO:0005509]	Recovered	cluster 2	0	-0.701239	-0.171895	-0.232944		cluster 4	0	-1.89687	-2.48128	-1.4901								cluster 2	0	-0.97148	2.01826	-0.546313		cluster 3	0	-1.19563	-2.30938	-1.25716
Q9UBI1	COMMD3	COMM domain-containing protein 3 (Protein Bup) (Protein PIL)	extracellular region [GO:0005576]; ficolin-1-rich granule lumen [GO:1904813]; nucleus [GO:0005634]	sodium ion transport [GO:0006814]		Recovered	cluster 2	0	-0.962745	-0.563284	-0.41657
Q9UBK8	MTRR	Methionine synthase reductase (MSR) (EC 1.16.1.8) (Aquacobalamin reductase) (AqCbl reductase)	cytosol [GO:0005829]; intermediate filament cytoskeleton [GO:0045111]; nucleoplasm [GO:0005654]	folic acid metabolic process [GO:0046655]; homocysteine catabolic process [GO:0043418]; homocysteine metabolic process [GO:0050667]; methionine biosynthetic process [GO:0009086]; negative regulation of cystathionine beta-synthase activity [GO:1904042]; S-adenosylmethionine cycle [GO:0033353]	[methionine synthase] reductase activity [GO:0030586]; FAD binding [GO:0071949]; flavin adenine dinucleotide binding [GO:0050660]; FMN binding [GO:0010181]; NADPH binding [GO:0070402]; NADPH-hemoprotein reductase activity [GO:0003958]; oxidoreductase activity, acting on metal ions, NAD or NADP as acceptor [GO:0016723]	Recovered	cluster 2	0	-1.21025	-0.367553	-0.277729		cluster 2	0	-1.49369	-1.32453	-1.3205								cluster 2	0	0.0139746	1.79442	-0.319623	Decrease	cluster 1	0	-0.28344	-0.95698	-1.04277
Q9UEE9	CFDP1	Craniofacial development protein 1 (Bucentaur)	kinetochore [GO:0000776]; nucleus [GO:0005634]; Swr1 complex [GO:0000812]	cell adhesion [GO:0007155]; chromatin remodeling [GO:0006338]; fibroblast apoptotic process [GO:0044346]; negative regulation of fibroblast apoptotic process [GO:2000270]; regulation of cell population proliferation [GO:0042127]; regulation of cell shape [GO:0008360]		Recovered	cluster 2	0	-0.817536	-0.311785	-0.188352		cluster 3	0	-1.77271	-2.42147	-1.98728								cluster 8	0	0.981993	-0.19376	1.67323		cluster 3	0	-0.955172	-2.10968	-1.79893
Q9UHB6	LIMA1	LIM domain and actin-binding protein 1 (Epithelial protein lost in neoplasm)	actin cytoskeleton [GO:0015629]; brush border membrane [GO:0031526]; cleavage furrow [GO:0032154]; cytosol [GO:0005829]; focal adhesion [GO:0005925]; plasma membrane [GO:0005886]; ruffle [GO:0001726]; stress fiber [GO:0001725]	actin filament bundle assembly [GO:0051017]; cell migration [GO:0016477]; cholesterol homeostasis [GO:0042632]; cholesterol metabolic process [GO:0008203]; intestinal cholesterol absorption [GO:0030299]; negative regulation of actin filament depolymerization [GO:0030835]; ruffle organization [GO:0031529]	actin filament binding [GO:0051015]; actin monomer binding [GO:0003785]; cadherin binding [GO:0045296]; metal ion binding [GO:0046872]	Recovered	cluster 2	0	-1.67701	-1.29127	-0.529822
Q9UHB9	SRP68	Signal recognition particle subunit SRP68 (SRP68) (Signal recognition particle 68 kDa protein)	cytosol [GO:0005829]; endoplasmic reticulum [GO:0005783]; focal adhesion [GO:0005925]; nucleolus [GO:0005730]; ribosome [GO:0005840]; signal recognition particle [GO:0048500]; signal recognition particle, endoplasmic reticulum targeting [GO:0005786]	response to xenobiotic stimulus [GO:0009410]; SRP-dependent cotranslational protein targeting to membrane [GO:0006614]	7S RNA binding [GO:0008312]; endoplasmic reticulum signal peptide binding [GO:0030942]; protein domain specific binding [GO:0019904]; RNA binding [GO:0003723]; signal recognition particle binding [GO:0005047]	Recovered	cluster 2	0	-0.827001	-0.421364	-0.377385		cluster 2	0	-1.51844	-1.69077	-1.27461								cluster 1	0	1.62625	1.76805	0.998313		cluster 3	0	-0.691435	-1.26941	-0.89722
Q9UHD1	CHORDC1	Cysteine and histidine-rich domain-containing protein 1 (CHORD domain-containing protein 1) (CHORD-containing protein 1) (CHP-1) (Protein morgana)		centrosome duplication [GO:0051298]; chaperone-mediated protein folding [GO:0061077]; regulation of cellular response to heat [GO:1900034]; regulation of centrosome duplication [GO:0010824]	ADP binding [GO:0043531]; ATP binding [GO:0005524]; Hsp90 protein binding [GO:0051879]; zinc ion binding [GO:0008270]	Recovered	cluster 2	0	-0.797173	-0.122307	-0.0512987		cluster 2	0	-2.10634	-2.44392	-1.86862								cluster 1	0	1.74906	0.647002	0.887675		cluster 3	0	-1.30916	-2.32162	-1.81732
Q9UHR5	SAP30BP	SAP30-binding protein (Transcriptional regulator protein HCNGP)	intermediate filament cytoskeleton [GO:0045111]; nucleoplasm [GO:0005654]; nucleus [GO:0005634]	modulation by host of symbiont transcription [GO:0052472]; regulation of DNA-templated transcription [GO:0006355]; response to virus [GO:0009615]		Recovered	cluster 2	0	-1.16859	-1.05766	-0.120916
Q9UHX1	PUF60	Poly(U)-binding-splicing factor PUF60 (60 kDa poly(U)-binding-splicing factor) (FUSE-binding protein-interacting repressor) (FBP-interacting repressor) (Ro-binding protein 1) (RoBP1) (Siah-binding protein 1) (Siah-BP1)	catalytic step 2 spliceosome [GO:0071013]; cell junction [GO:0030054]; nucleoplasm [GO:0005654]; precatalytic spliceosome [GO:0071011]	alternative mRNA splicing, via spliceosome [GO:0000380]; apoptotic process [GO:0006915]; mRNA splice site recognition [GO:0006376]; regulation of alternative mRNA splicing, via spliceosome [GO:0000381]	cadherin binding [GO:0045296]; DNA binding [GO:0003677]; identical protein binding [GO:0042802]; RNA binding [GO:0003723]	Recovered	cluster 2	0	-0.996772	-0.262889	-0.347362		cluster 2	0	-1.59612	-1.30599	-1.35966	Recovered	cluster 12	0	-2.35222	-1.97266	-0.526852		cluster 5	0	1.35544	1.70977	0.17949		cluster 3	0	-0.599352	-1.0431	-1.0123
Q9UJC3	HOOK1	Protein Hook homolog 1 (h-hook1) (hHK1)	centrosome [GO:0005813]; cytoplasm [GO:0005737]; FHF complex [GO:0070695]; microtubule [GO:0005874]	cytoplasmic microtubule organization [GO:0031122]; cytoskeleton-dependent intracellular transport [GO:0030705]; early endosome to late endosome transport [GO:0045022]; endosome organization [GO:0007032]; endosome to lysosome transport [GO:0008333]; Golgi organization [GO:0007030]; lysosome organization [GO:0007040]; manchette assembly [GO:1905198]; protein localization to perinuclear region of cy…	actin binding [GO:0003779]; dynein light intermediate chain binding [GO:0051959]; identical protein binding [GO:0042802]; microtubule binding [GO:0008017]; protein homodimerization activity [GO:0042803]	Recovered	cluster 2	0	-0.899118	-0.367515	-0.281799		cluster 2	0	-2.26055	-2.44805	-2.21734														cluster 3	0	-1.36143	-2.08054	-1.93554
Q9UJF2	RASAL2	Ras GTPase-activating protein nGAP (RAS protein activator-like 2)	cytosol [GO:0005829]	adipose tissue development [GO:0060612]; gene expression [GO:0010467]; multicellular organism growth [GO:0035264]; regulation of protein activation cascade [GO:2000257]; response to dietary excess [GO:0002021]; response to glucose [GO:0009749]; signal transduction [GO:0007165]	GTPase activator activity [GO:0005096]	Recovered	cluster 2	0	-1.33705	-0.882463	-0.288785		cluster 4	0	-2.46542	-3.01531	-1.97134								cluster 9	0	-1.05916	-0.714703	-0.450978		cluster 3	0	-1.12837	-2.13285	-1.68255
Q9UJY5	GGA1	ADP-ribosylation factor-binding protein GGA1 (Gamma-adaptin-related protein 1) (Golgi-localized, gamma ear-containing, ARF-binding protein 1)	cytosol [GO:0005829]; early endosome [GO:0005769]; early endosome membrane [GO:0031901]; endosome membrane [GO:0010008]; Golgi apparatus [GO:0005794]; intracellular membrane-bounded organelle [GO:0043231]; membrane [GO:0016020]; nucleoplasm [GO:0005654]; protein-containing complex [GO:0032991]; trans-Golgi network [GO:0005802]	Golgi to plasma membrane protein transport [GO:0043001]; Golgi to plasma membrane transport [GO:0006893]; intracellular protein transport [GO:0006886]; positive regulation of protein catabolic process [GO:0045732]; protein catabolic process [GO:0030163]; protein localization [GO:0008104]; protein localization to cell surface [GO:0034394]; protein localization to ciliary membrane [GO:1903441]; ret…	phosphatidylinositol binding [GO:0035091]; small GTPase binding [GO:0031267]; ubiquitin binding [GO:0043130]	Recovered	cluster 2	0	-0.998862	-0.231238	-0.0937014		cluster 2	0	-1.47213	-1.36576	-1.25703							Increase	cluster 3	0	-0.226575	1.57627	1.56516		cluster 3	0	-0.473264	-1.13453	-1.16333
Q9UK76	JPT1	Jupiter microtubule associated homolog 1 (Androgen-regulated protein 2) (Hematological and neurological expressed 1 protein) [Cleaved into: Jupiter microtubule associated homolog 1, N-terminally processed]	cytosol [GO:0005829]; intercellular bridge [GO:0045171]; microtubule cytoskeleton [GO:0015630]; nucleus [GO:0005634]			Recovered	cluster 2	0	-1.56837	-1.31919	-0.175674		cluster 10	0	-1.60507	-3.15748	-2.24207								cluster 9	0	-2.06363	-2.1989	-1.02641	Decrease	cluster 1	0	-0.0367073	-1.83829	-2.0664
Q9UKA2	FBXL4	F-box/LRR-repeat protein 4 (F-box and leucine-rich repeat protein 4) (F-box protein FBL4/FBL5)	cytosol [GO:0005829]; mitochondrial intermembrane space [GO:0005758]; nuclear speck [GO:0016607]; SCF ubiquitin ligase complex [GO:0019005]; ubiquitin ligase complex [GO:0000151]	autophagy of mitochondrion [GO:0000422]; SCF-dependent proteasomal ubiquitin-dependent protein catabolic process [GO:0031146]; ubiquitin-dependent protein catabolic process [GO:0006511]		Recovered	cluster 2	0	-0.562293	-0.232647	-0.246692
Q9UKD1	GMEB2	Glucocorticoid modulatory element-binding protein 2 (GMEB-2) (DNA-binding protein p79PIF) (Parvovirus initiation factor p79) (PIF p79)	chromatin [GO:0000785]; cytosol [GO:0005829]; nucleoplasm [GO:0005654]; nucleus [GO:0005634]	regulation of transcription by RNA polymerase II [GO:0006357]; transcription by RNA polymerase II [GO:0006366]	DNA-binding transcription factor activity, RNA polymerase II-specific [GO:0000981]; identical protein binding [GO:0042802]; metal ion binding [GO:0046872]; RNA polymerase II cis-regulatory region sequence-specific DNA binding [GO:0000978]; sequence-specific double-stranded DNA binding [GO:1990837]	Recovered	cluster 2	0	-0.740462	-0.122527	-0.154809
Q9UKK9	NUDT5	ADP-sugar pyrophosphatase (EC 3.6.1.13) (8-oxo-dGDP phosphatase) (EC 3.6.1.58) (Nuclear ATP-synthesis protein NUDIX5) (EC 2.7.7.96) (Nucleoside diphosphate-linked moiety X motif 5) (Nudix motif 5) (hNUDT5) (YSA1H)	cytosol [GO:0005829]; extracellular exosome [GO:0070062]; nucleus [GO:0005634]	ATP generation from poly-ADP-D-ribose [GO:1990966]; chromatin remodeling [GO:0006338]; D-ribose catabolic process [GO:0019303]; nucleobase-containing small molecule metabolic process [GO:0055086]; nucleoside phosphate metabolic process [GO:0006753]; nucleotide metabolic process [GO:0009117]; ribonucleoside diphosphate catabolic process [GO:0009191]; ribose phosphate metabolic process [GO:0019693]	8-oxo-dGDP phosphatase activity [GO:0044715]; 8-oxo-GDP phosphatase activity [GO:0044716]; ADP-ribose diphosphatase activity [GO:0047631]; ADP-sugar diphosphatase activity [GO:0019144]; identical protein binding [GO:0042802]; magnesium ion binding [GO:0000287]; nucleotidyltransferase activity [GO:0016779]; protein homodimerization activity [GO:0042803]; snoRNA binding [GO:0030515]	Recovered	cluster 2	0	-1.18843	-0.198233	0.142934		cluster 2	0	-1.18978	-0.968486	-0.809583		cluster 10	0	-1.02295	-1.18917	-0.666519	Increase	cluster 3	0	-0.165478	0.990934	0.809454	Decrease	cluster 1	0	-0.0013519	-0.770253	-0.952517
Q9UKX7	NUP50	Nuclear pore complex protein Nup50 (50 kDa nucleoporin) (Nuclear pore-associated protein 60 kDa-like) (Nucleoporin Nup50)	nuclear envelope [GO:0005635]; nuclear membrane [GO:0031965]; nuclear pore [GO:0005643]; nucleoplasm [GO:0005654]	mRNA transport [GO:0051028]; nucleocytoplasmic transport [GO:0006913]; protein import into nucleus [GO:0006606]		Recovered	cluster 2	0	-0.446401	-0.122431	0.0111253
Q9UL25	RAB21	Ras-related protein Rab-21	axon cytoplasm [GO:1904115]; cleavage furrow [GO:0032154]; cytoplasmic side of early endosome membrane [GO:0098559]; cytoplasmic side of plasma membrane [GO:0009898]; cytosol [GO:0005829]; early endosome [GO:0005769]; early endosome membrane [GO:0031901]; endomembrane system [GO:0012505]; endoplasmic reticulum membrane [GO:0005789]; endosome [GO:0005768]; extracellular exosome [GO:0070062]; focal…	anterograde axonal transport [GO:0008089]; intracellular protein transport [GO:0006886]; positive regulation of dendrite morphogenesis [GO:0050775]; positive regulation of early endosome to late endosome transport [GO:2000643]; positive regulation of receptor-mediated endocytosis [GO:0048260]; protein stabilization [GO:0050821]; Rab protein signal transduction [GO:0032482]; regulation of axon ext…	GDP binding [GO:0019003]; GTP binding [GO:0005525]; GTPase activity [GO:0003924]	Recovered	cluster 2	0	-0.948015	-0.539902	-0.171069		cluster 2	0	-1.66304	-1.73004	-1.68491							Increase	cluster 3	0	-0.28413	0.594439	0.36197	Decrease	cluster 1	0	-0.715025	-1.19014	-1.51384
Q9UL46	PSME2	Proteasome activator complex subunit 2 (11S regulator complex subunit beta) (REG-beta) (Activator of multicatalytic protease subunit 2) (Proteasome activator 28 subunit beta) (PA28b) (PA28beta)	cytoplasm [GO:0005737]; cytosol [GO:0005829]; extracellular exosome [GO:0070062]; membrane [GO:0016020]; nucleoplasm [GO:0005654]; proteasome activator complex [GO:0008537]; proteasome complex [GO:0000502]	regulation of G1/S transition of mitotic cell cycle [GO:2000045]; regulation of proteasomal protein catabolic process [GO:0061136]	endopeptidase activator activity [GO:0061133]; identical protein binding [GO:0042802]	Recovered	cluster 2	0	-0.661223	-0.554623	-0.223131		cluster 3	0	-0.305659	-0.585039	-0.557379													Decrease	cluster 1	0	0.355564	-0.0304163	-0.334248
Q9ULC3	RAB23	Ras-related protein Rab-23	autophagosome [GO:0005776]; cell junction [GO:0030054]; centrosome [GO:0005813]; cytoplasm [GO:0005737]; cytosol [GO:0005829]; endomembrane system [GO:0012505]; endosome membrane [GO:0010008]; phagocytic vesicle [GO:0045335]; phagocytic vesicle membrane [GO:0030670]; plasma membrane [GO:0005886]	autophagosome assembly [GO:0000045]; cellular defense response [GO:0006968]; cilium assembly [GO:0060271]; craniofacial suture morphogenesis [GO:0097094]; GTP metabolic process [GO:0046039]; intracellular protein transport [GO:0006886]; negative regulation of protein import into nucleus [GO:0042308]; vesicle-mediated transport [GO:0016192]	GTP binding [GO:0005525]; GTPase activity [GO:0003924]	Recovered	cluster 2	0	-1.23429	-0.179791	-0.268356		cluster 2	0	-1.43918	-1.18504	-1.17606													Decrease	cluster 1	0	-0.204891	-1.00525	-0.907705
Q9UMZ2	SYNRG	Synergin gamma (AP1 subunit gamma-binding protein 1) (Gamma-synergin)	AP-1 adaptor complex [GO:0030121]; clathrin coat of trans-Golgi network vesicle [GO:0030130]; cytoplasm [GO:0005737]; Golgi apparatus [GO:0005794]; perinuclear region of cytoplasm [GO:0048471]	endocytosis [GO:0006897]; intracellular protein transport [GO:0006886]		Recovered	cluster 2	0	-0.799003	-0.218253	-0.174599		cluster 2	0	-1.75021	-2.03938	-1.70796		cluster 6	0	-0.562692	-1.43056	-1.04147	Increase	cluster 3	0	-0.236312	1.2123	0.866873		cluster 3	0	-0.951209	-1.82112	-1.53336
Q9UPN9	TRIM33	E3 ubiquitin-protein ligase TRIM33 (EC 2.3.2.27) (Ectodermin homolog) (RET-fused gene 7 protein) (Protein Rfg7) (RING-type E3 ubiquitin transferase TRIM33) (Transcription intermediary factor 1-gamma) (TIF1-gamma) (Tripartite motif-containing protein 33)	nucleoplasm [GO:0005654]; nucleus [GO:0005634]	negative regulation of BMP signaling pathway [GO:0030514]; negative regulation of DNA-templated transcription [GO:0045892]; negative regulation of transcription by RNA polymerase II [GO:0000122]; protein ubiquitination [GO:0016567]; regulation of transforming growth factor beta receptor signaling pathway [GO:0017015]	co-SMAD binding [GO:0070410]; DNA binding [GO:0003677]; R-SMAD binding [GO:0070412]; ubiquitin-protein transferase activity [GO:0004842]; zinc ion binding [GO:0008270]	Recovered	cluster 2	0	-0.949684	-0.234049	0.0422527
Q9UPQ0	LIMCH1	LIM and calponin homology domains-containing protein 1	cytoplasm [GO:0005737]; stress fiber [GO:0001725]	actomyosin structure organization [GO:0031032]; cytoplasmic actin-based contraction involved in cell motility [GO:0060327]; negative regulation of cell migration [GO:0030336]; positive regulation of protein phosphorylation [GO:0001934]; positive regulation of stress fiber assembly [GO:0051496]; regulation of focal adhesion assembly [GO:0051893]	actin binding [GO:0003779]; metal ion binding [GO:0046872]; myosin II head/neck binding [GO:0032034]	Recovered	cluster 2	0	-1.23021	-0.419152	-0.0743602		cluster 3	0	-2.0529	-3.34536	-2.22635								cluster 4	0	-1.66422	-0.55028	-1.87926		cluster 3	0	-0.822684	-2.92621	-2.15199
Q9UPU5	USP24	Ubiquitin carboxyl-terminal hydrolase 24 (EC 3.4.19.12) (Deubiquitinating enzyme 24) (Ubiquitin thioesterase 24) (Ubiquitin-specific-processing protease 24)	cytosol [GO:0005829]; nucleoplasm [GO:0005654]; nucleus [GO:0005634]	proteolysis [GO:0006508]	cysteine-type deubiquitinase activity [GO:0004843]	Recovered	cluster 2	0	-1.06312	-0.505158	-0.278395		cluster 2	0	-1.80411	-1.63204	-1.34971														cluster 3	0	-0.74099	-1.12688	-1.07131
Q9UPZ3	HPS5	BLOC-2 complex member HPS5 (Alpha-integrin-binding protein 63) (Hermansky-Pudlak syndrome 5 protein) (Ruby-eye protein 2 homolog) (Ru2)	BLOC-2 complex [GO:0031084]; cytoplasm [GO:0005737]; cytosol [GO:0005829]; early endosome [GO:0005769]	blood coagulation [GO:0007596]; developmental pigmentation [GO:0048066]; intracellular transport [GO:0046907]; melanosome assembly [GO:1903232]; platelet dense granule organization [GO:0060155]		Recovered	cluster 2	0	-0.884705	-0.101027	-0.155105		cluster 11	0	-2.83877	-0.504913	-1.21817														cluster 7	0	-1.95407	-0.403886	-1.06306
Q9UQ35	SRRM2	Serine/arginine repetitive matrix protein 2 (300 kDa nuclear matrix antigen) (Serine/arginine-rich splicing factor-related nuclear matrix protein of 300 kDa) (SR-related nuclear matrix protein of 300 kDa) (Ser/Arg-related nuclear matrix protein of 300 kDa) (Splicing coactivator subunit SRm300) (Tax-responsive enhancer element-binding protein 803) (TaxREB803)	Cajal body [GO:0015030]; catalytic step 2 spliceosome [GO:0071013]; nuclear speck [GO:0016607]; nucleoplasm [GO:0005654]; nucleus [GO:0005634]; U2-type catalytic step 2 spliceosome [GO:0071007]; U2-type precatalytic spliceosome [GO:0071005]	mRNA splicing, via spliceosome [GO:0000398]	C2H2 zinc finger domain binding [GO:0070742]; mRNA binding [GO:0003729]; RNA binding [GO:0003723]	Recovered	cluster 2	0	-1.1229	-0.351091	-0.569562														cluster 5	0	2.2453	2.05628	0.876018		cluster 3	0	-2.77332	-3.04365	-2.10518
Q9Y223	GNE	Bifunctional UDP-N-acetylglucosamine 2-epimerase/N-acetylmannosamine kinase (UDP-GlcNAc-2-epimerase/ManAc kinase) [Includes: UDP-N-acetylglucosamine 2-epimerase (hydrolyzing) (EC 3.2.1.183) (UDP-GlcNAc-2-epimerase) (Uridine diphosphate-N-acetylglucosamine-2-epimerase); N-acetylmannosamine kinase (EC 2.7.1.60) (ManAc kinase)]	cytosol [GO:0005829]	N-acetylglucosamine biosynthetic process [GO:0006045]; N-acetylneuraminate biosynthetic process [GO:0046380]; UDP-N-acetylglucosamine metabolic process [GO:0006047]	ATP binding [GO:0005524]; hexokinase activity [GO:0004396]; hydrolase activity, hydrolyzing O-glycosyl compounds [GO:0004553]; metal ion binding [GO:0046872]; N-acylmannosamine kinase activity [GO:0009384]; UDP-N-acetylglucosamine 2-epimerase activity [GO:0008761]	Recovered	cluster 2	0	-0.335185	-0.167588	-0.0400006	Recovered	cluster 1	0	-1.18138	-0.809831	-0.658556														cluster 2	0	-0.846194	-0.642243	-0.618556
Q9Y265	RUVBL1	RuvB-like 1 (EC 3.6.4.12) (49 kDa TATA box-binding protein-interacting protein) (49 kDa TBP-interacting protein) (54 kDa erythrocyte cytosolic protein) (ECP-54) (INO80 complex subunit H) (Nuclear matrix protein 238) (NMP 238) (Pontin 52) (TIP49a) (TIP60-associated protein 54-alpha) (TAP54-alpha)	centrosome [GO:0005813]; cytosol [GO:0005829]; dynein axonemal particle [GO:0120293]; extracellular exosome [GO:0070062]; Ino80 complex [GO:0031011]; membrane [GO:0016020]; MLL1 complex [GO:0071339]; NuA4 histone acetyltransferase complex [GO:0035267]; nuclear matrix [GO:0016363]; nucleoplasm [GO:0005654]; nucleosome [GO:0000786]; nucleus [GO:0005634]; protein folding chaperone complex [GO:010103…	box C/D snoRNP assembly [GO:0000492]; cell cycle [GO:0007049]; cell division [GO:0051301]; chromatin remodeling [GO:0006338]; DNA recombination [GO:0006310]; DNA repair [GO:0006281]; positive regulation of canonical Wnt signaling pathway [GO:0090263]; positive regulation of DNA repair [GO:0045739]; positive regulation of DNA-templated transcription [GO:0045893]; positive regulation of double-stra…	ADP binding [GO:0043531]; ATP binding [GO:0005524]; ATP hydrolysis activity [GO:0016887]; ATPase binding [GO:0051117]; cadherin binding [GO:0045296]; DNA helicase activity [GO:0003678]; TBP-class protein binding [GO:0017025]; TFIID-class transcription factor complex binding [GO:0001094]; transcription coactivator activity [GO:0003713]	Recovered	cluster 2	0	-0.656969	-0.189614	-0.241954		cluster 2	0	-1.40266	-1.34325	-1.09753								cluster 1	0	2.08928	1.46721	1.47153		cluster 3	0	-0.745688	-1.15363	-0.855574
Q9Y266	NUDC	Nuclear migration protein nudC (Nuclear distribution protein C homolog)	cytoplasm [GO:0005737]; cytosol [GO:0005829]; microtubule [GO:0005874]; midbody [GO:0030496]; mitotic spindle [GO:0072686]; nucleoplasm [GO:0005654]; spindle [GO:0005819]	cell division [GO:0051301]; mitotic metaphase chromosome alignment [GO:0007080]; mitotic spindle organization [GO:0007052]; nuclear migration [GO:0007097]; protein folding [GO:0006457]; response to peptide hormone [GO:0043434]	cadherin binding [GO:0045296]; unfolded protein binding [GO:0051082]	Recovered	cluster 2	0	-0.731766	-0.454111	-0.220126		cluster 4	0	-1.75624	-1.97771	-1.32676								cluster 5	0	0.495466	0.675572	-0.345326		cluster 3	0	-1.02448	-1.5236	-1.10663
Q9Y2I7	PIKFYVE	1-phosphatidylinositol 3-phosphate 5-kinase (Phosphatidylinositol 3-phosphate 5-kinase) (EC 2.7.1.150) (FYVE finger-containing phosphoinositide kinase) (PIKfyve) (Phosphatidylinositol 3-phosphate 5-kinase type III) (PIPkin-III) (Type III PIP kinase) (Serine-protein kinase PIKFYVE) (EC 2.7.11.1)	cell-cell junction [GO:0005911]; cytoplasmic vesicle [GO:0031410]; cytosol [GO:0005829]; early endosome membrane [GO:0031901]; endosome membrane [GO:0010008]; Golgi membrane [GO:0000139]; late endosome membrane [GO:0031902]; membrane raft [GO:0045121]; perinuclear region of cytoplasm [GO:0048471]; phagocytic vesicle membrane [GO:0030670]; vesicle membrane [GO:0012506]	1-phosphatidyl-1D-myo-inositol 3,5-bisphosphate metabolic process [GO:1903100]; antigen processing and presentation of exogenous peptide antigen via MHC class II [GO:0019886]; intracellular signal transduction [GO:0035556]; melanosome organization [GO:0032438]; myelin assembly [GO:0032288]; neutrophil chemotaxis [GO:0030593]; peptidyl-serine autophosphorylation [GO:0036289]; phagosome maturation …	1-phosphatidylinositol-3-phosphate 5-kinase activity [GO:0000285]; 1-phosphatidylinositol-4-phosphate 5-kinase activity [GO:0016308]; 1-phosphatidylinositol-5-kinase activity [GO:0052810]; ATP binding [GO:0005524]; phosphatidylinositol-3,5-bisphosphate 5-phosphatase activity [GO:0043813]; protein serine kinase activity [GO:0106310]; protein serine/threonine kinase activity [GO:0004674]; zinc ion …	Recovered	cluster 2	0	-0.974688	-0.61304	-0.376499		cluster 2	0	-1.46794	-1.43094	-1.36647													Decrease	cluster 1	0	-0.493249	-0.817898	-0.989973
Q9Y2W6	TDRKH	Tudor and KH domain-containing protein (Tudor domain-containing protein 2)	mitochondrion [GO:0005739]; P granule [GO:0043186]; pi-body [GO:0071546]; piP-body [GO:0071547]	fertilization [GO:0009566]; male meiotic nuclear division [GO:0007140]; P granule organization [GO:0030719]; piRNA processing [GO:0034587]; spermatogenesis [GO:0007283]	RNA binding [GO:0003723]	Recovered	cluster 2	0	-0.57488	-0.215864	-0.256589
Q9Y2X3	NOP58	Nucleolar protein 58 (Nucleolar protein 5)	box C/D RNP complex [GO:0031428]; Cajal body [GO:0015030]; cytosol [GO:0005829]; fibrillar center [GO:0001650]; membrane [GO:0016020]; nucleolus [GO:0005730]; nucleoplasm [GO:0005654]; pre-snoRNP complex [GO:0070761]; small-subunit processome [GO:0032040]; sno(s)RNA-containing ribonucleoprotein complex [GO:0005732]	ribosomal small subunit biogenesis [GO:0042274]; rRNA processing [GO:0006364]; snoRNA localization [GO:0048254]	ATPase binding [GO:0051117]; RNA binding [GO:0003723]; snoRNA binding [GO:0030515]; TFIID-class transcription factor complex binding [GO:0001094]	Recovered	cluster 2	0	-2.38304	-0.956898	-0.502757
Q9Y2X9	ZNF281	Zinc finger protein 281 (GC-box-binding zinc finger protein 1) (Transcription factor ZBP-99) (Zinc finger DNA-binding protein 99)	nucleoplasm [GO:0005654]; nucleus [GO:0005634]	embryonic body morphogenesis [GO:0010172]; negative regulation of DNA-templated transcription [GO:0045892]; negative regulation of gene expression [GO:0010629]; negative regulation of transcription by RNA polymerase II [GO:0000122]; positive regulation of DNA-templated transcription [GO:0045893]; regulation of DNA-templated transcription [GO:0006355]; stem cell differentiation [GO:0048863]	DNA-binding transcription factor activity [GO:0003700]; DNA-binding transcription factor activity, RNA polymerase II-specific [GO:0000981]; DNA-binding transcription repressor activity, RNA polymerase II-specific [GO:0001227]; metal ion binding [GO:0046872]; RNA polymerase II cis-regulatory region sequence-specific DNA binding [GO:0000978]; sequence-specific DNA binding [GO:0043565]; sequence-spe…	Recovered	cluster 2	0	-0.846439	-0.466166	-0.315651							Recovered	cluster 12	0	-1.67574	-1.07019	-0.428825		cluster 5	0	0.829304	0.604029	0.113174		cluster 3	0	-0.347651	-3.49192	0.72975
Q9Y3P9	RABGAP1	Rab GTPase-activating protein 1 (GAP and centrosome-associated protein) (Rab6 GTPase-activating protein GAPCenA)	centrosome [GO:0005813]; cytosol [GO:0005829]; microtubule associated complex [GO:0005875]	cell cycle [GO:0007049]; regulation of GTPase activity [GO:0043087]	GTPase activator activity [GO:0005096]; small GTPase binding [GO:0031267]; tubulin binding [GO:0015631]	Recovered	cluster 2	0	-0.831689	-0.626704	-0.324544	Recovered	cluster 1	0	-2.17968	-1.3494	-1.36069														cluster 2	0	-1.34799	-0.722693	-1.03614
Q9Y450	HBS1L	HBS1-like protein (EC 3.6.5.-) (ERFS)	cytosol [GO:0005829]; cytosolic ribosome [GO:0022626]; Dom34-Hbs1 complex [GO:1990533]; extracellular exosome [GO:0070062]; membrane [GO:0016020]	nuclear-transcribed mRNA catabolic process, no-go decay [GO:0070966]; rescue of stalled ribosome [GO:0072344]; ribosome disassembly [GO:0032790]; signal transduction [GO:0007165]; translation [GO:0006412]	GTP binding [GO:0005525]; GTPase activity [GO:0003924]; translation elongation factor activity [GO:0003746]	Recovered	cluster 2	0	-0.860917	-0.189855	-0.328125																				cluster 3	0	-1.70983	-2.45123	-1.78558
Q9Y4R8	TELO2	Telomere length regulation protein TEL2 homolog (Protein clk-2 homolog) (hCLK2)	chromosome, telomeric region [GO:0000781]; cytoplasm [GO:0005737]; cytosol [GO:0005829]; membrane [GO:0016020]; nuclear body [GO:0016604]; nucleus [GO:0005634]; TTT Hsp90 cochaperone complex [GO:0110078]	positive regulation of DNA damage checkpoint [GO:2000003]; protein stabilization [GO:0050821]; telomere maintenance via telomerase [GO:0007004]	Hsp90 protein binding [GO:0051879]; molecular adaptor activity [GO:0060090]; protein kinase binding [GO:0019901]; protein-containing complex binding [GO:0044877]; telomeric DNA binding [GO:0042162]	Recovered	cluster 2	0	-0.447259	-0.0476032	0.160276
Q9Y508	RNF114	E3 ubiquitin-protein ligase RNF114 (EC 2.3.2.27) (RING finger protein 114) (RING-type E3 ubiquitin transferase RNF114) (Zinc finger protein 228) (Zinc finger protein 313)	cytosol [GO:0005829]; nucleus [GO:0005634]; plasma membrane [GO:0005886]	cell differentiation [GO:0030154]; protein polyubiquitination [GO:0000209]; spermatogenesis [GO:0007283]; ubiquitin-dependent protein catabolic process [GO:0006511]	metal ion binding [GO:0046872]; ubiquitin protein ligase activity [GO:0061630]	Recovered	cluster 2	0	-1.19004	-0.635134	-0.0396646																				cluster 3	0	-0.904488	-1.20209	-1.4633
Q9Y5Y5	PEX16	Peroxisomal membrane protein PEX16 (Peroxin-16) (Peroxisomal biogenesis factor 16)	cytosol [GO:0005829]; endoplasmic reticulum [GO:0005783]; endoplasmic reticulum membrane [GO:0005789]; membrane [GO:0016020]; peroxisomal membrane [GO:0005778]; peroxisome [GO:0005777]	ER-dependent peroxisome localization [GO:0106101]; ER-dependent peroxisome organization [GO:0032581]; peroxisome membrane biogenesis [GO:0016557]; peroxisome organization [GO:0007031]; protein import into peroxisome matrix [GO:0016558]; protein import into peroxisome membrane [GO:0045046]; protein targeting to peroxisome [GO:0006625]; protein to membrane docking [GO:0022615]		Recovered	cluster 2	0	-1.22662	-0.468154	-0.0263198
Q9Y617	PSAT1	Phosphoserine aminotransferase (EC 2.6.1.52) (Phosphohydroxythreonine aminotransferase) (PSAT)	cytoplasm [GO:0005737]; cytosol [GO:0005829]; extracellular exosome [GO:0070062]	L-serine biosynthetic process [GO:0006564]; pyridoxine biosynthetic process [GO:0008615]	identical protein binding [GO:0042802]; O-phospho-L-serine:2-oxoglutarate aminotransferase activity [GO:0004648]; pyridoxal phosphate binding [GO:0030170]	Recovered	cluster 2	0	-0.713256	-0.101309	-0.0366498		cluster 2	0	-1.24217	-1.04384	-1.12236		cluster 3	0	-0.926617	-0.765375	-0.564239		cluster 1	0	0.213361	0.664066	0.527589	Decrease	cluster 1	0	-0.528914	-0.942532	-1.08571
Q9Y618	NCOR2	Nuclear receptor corepressor 2 (N-CoR2) (CTG repeat protein 26) (SMAP270) (Silencing mediator of retinoic acid and thyroid hormone receptor) (SMRT) (T3 receptor-associating factor) (TRAC) (Thyroid-, retinoic-acid-receptor-associated corepressor)	chromatin [GO:0000785]; membrane [GO:0016020]; nuclear body [GO:0016604]; nuclear matrix [GO:0016363]; nucleoplasm [GO:0005654]; nucleus [GO:0005634]; transcription repressor complex [GO:0017053]	cerebellum development [GO:0021549]; estrous cycle [GO:0044849]; lactation [GO:0007595]; negative regulation of androgen receptor signaling pathway [GO:0060766]; negative regulation of DNA-templated transcription [GO:0045892]; negative regulation of miRNA transcription [GO:1902894]; negative regulation of transcription by RNA polymerase II [GO:0000122]; regulation of cellular ketone metabolic pro…	chromatin binding [GO:0003682]; DNA binding [GO:0003677]; histone deacetylase binding [GO:0042826]; Notch binding [GO:0005112]; nuclear glucocorticoid receptor binding [GO:0035259]; nuclear retinoid X receptor binding [GO:0046965]; transcription corepressor activity [GO:0003714]	Recovered	cluster 2	0	-1.55556	-0.622746	-0.132616
Q9Y6A5	TACC3	Transforming acidic coiled-coil-containing protein 3 (ERIC-1)	centriolar satellite [GO:0034451]; cytoplasm [GO:0005737]; cytosol [GO:0005829]; intracellular membrane-bounded organelle [GO:0043231]; mitotic spindle [GO:0072686]; spindle pole [GO:0000922]	cell division [GO:0051301]; cell population proliferation [GO:0008283]; cerebral cortex development [GO:0021987]; metaphase/anaphase transition of mitotic cell cycle [GO:0007091]; microtubule cytoskeleton organization [GO:0000226]; microtubule cytoskeleton organization involved in mitosis [GO:1902850]; mitotic spindle organization [GO:0007052]; regulation of mitotic spindle organization [GO:00602…		Recovered	cluster 2	0	-1.33465	-0.745527	-0.0804786
Q9Y6B6	SAR1B	Small COPII coat GTPase SAR1B (EC 3.6.5.2) (GTP-binding protein B) (GTBPB) (Secretion-associated Ras-related GTPase 1B)	COPII vesicle coat [GO:0030127]; cytosol [GO:0005829]; endoplasmic reticulum exit site [GO:0070971]; endoplasmic reticulum membrane [GO:0005789]; ER to Golgi transport vesicle membrane [GO:0012507]; Golgi cisterna membrane [GO:0032580]; lysosomal membrane [GO:0005765]	antigen processing and presentation of peptide antigen via MHC class I [GO:0002474]; cellular response to leucine starvation [GO:1990253]; COPII vesicle coating [GO:0048208]; COPII-coated vesicle cargo loading [GO:0090110]; endoplasmic reticulum to Golgi vesicle-mediated transport [GO:0006888]; intracellular protein transport [GO:0006886]; lipid export from cell [GO:0140353]; lipid homeostasis [G…	amino acid sensor activity [GO:0140785]; G protein activity [GO:0003925]; GTP binding [GO:0005525]; GTPase activity [GO:0003924]; metal ion binding [GO:0046872]	Recovered	cluster 2	0	-1.94716	-0.473558	-0.265984	Recovered	cluster 1	0	-1.78346	-1.03028	-0.992111													Decrease	cluster 1	0	0.163703	-0.556717	-0.726126
Q9Y6C9	MTCH2	Mitochondrial carrier homolog 2 (Met-induced mitochondrial protein)	membrane [GO:0016020]; mitochondrial outer membrane [GO:0005741]; mitochondrion [GO:0005739]; nucleus [GO:0005634]	lipid homeostasis [GO:0055088]; positive regulation of apoptotic process [GO:0043065]; positive regulation of stem cell differentiation [GO:2000738]; protein insertion into mitochondrial outer membrane [GO:0045040]; protein localization to mitochondrion [GO:0070585]; regulation of mitochondrial fusion [GO:0010635]	membrane insertase activity [GO:0032977]	Recovered	cluster 2	0	-1.579	-0.977714	-0.539176
Q9Y6G5	COMMD10	COMM domain-containing protein 10	cytoplasm [GO:0005737]; nucleoplasm [GO:0005654]			Recovered	cluster 2	0	-1.47553	-0.66983	-0.683855		cluster 2	0	-1.85217	-2.02169	-1.8819													Decrease	cluster 1	0	-0.376636	-1.35186	-1.19804
Q9Y6Y8	SEC23IP	SEC23-interacting protein (p125)	COPII-coated ER to Golgi transport vesicle [GO:0030134]; cytoplasm [GO:0005737]; cytosol [GO:0005829]; endoplasmic reticulum [GO:0005783]; endoplasmic reticulum-Golgi intermediate compartment [GO:0005793]; ER to Golgi transport vesicle membrane [GO:0012507]; Golgi apparatus [GO:0005794]; intracellular membrane-bounded organelle [GO:0043231]	endoplasmic reticulum to Golgi vesicle-mediated transport [GO:0006888]; Golgi organization [GO:0007030]; intracellular protein transport [GO:0006886]	metal ion binding [GO:0046872]; phospholipase activity [GO:0004620]; RNA binding [GO:0003723]	Recovered	cluster 2	0	-0.731416	-0.420117	-0.321144		cluster 2	0	-3.35762	-2.64333	-2.35256														cluster 2	0	-2.6262	-2.22321	-2.03141
A0FGR8	ESYT2	Extended synaptotagmin-2 (E-Syt2) (Chr2Syt)	cytoplasmic side of plasma membrane [GO:0009898]; cytosol [GO:0005829]; endoplasmic reticulum membrane [GO:0005789]; endoplasmic reticulum-plasma membrane contact site [GO:0140268]; extrinsic component of cytoplasmic side of plasma membrane [GO:0031234]; membrane [GO:0016020]; organelle membrane contact site [GO:0044232]; plasma membrane [GO:0005886]	endocytosis [GO:0006897]; endoplasmic reticulum-plasma membrane tethering [GO:0061817]; lipid transport [GO:0006869]	cadherin binding [GO:0045296]; calcium ion binding [GO:0005509]; calcium-dependent phospholipid binding [GO:0005544]; identical protein binding [GO:0042802]; phosphatidylcholine binding [GO:0031210]; phosphatidylethanolamine binding [GO:0008429]; phosphatidylinositol binding [GO:0035091]		cluster 3	0	-1.01628	-0.791253	-0.79651		cluster 2	0	-2.01916	-1.98103	-1.77763														cluster 3	0	-1.00288	-1.18978	-0.981121
A0FGR9	ESYT3	Extended synaptotagmin-3 (E-Syt3) (Chr3Syt)	cytoplasmic side of plasma membrane [GO:0009898]; endoplasmic reticulum membrane [GO:0005789]; endoplasmic reticulum-plasma membrane contact site [GO:0140268]; extrinsic component of cytoplasmic side of plasma membrane [GO:0031234]; organelle membrane contact site [GO:0044232]; plasma membrane [GO:0005886]	endoplasmic reticulum-plasma membrane tethering [GO:0061817]; lipid transport [GO:0006869]	calcium ion binding [GO:0005509]; calcium-dependent phospholipid binding [GO:0005544]; phosphatidylcholine binding [GO:0031210]; phosphatidylethanolamine binding [GO:0008429]; phosphatidylinositol binding [GO:0035091]		cluster 9	0	-2.4263	0.153692	0.880353
A0JNW5	BLTP3B	Bridge-like lipid transfer protein family member 3B (Syntaxin-6 Habc-interacting protein of 164 kDa) (UHRF1-binding protein 1-like)	cytosol [GO:0005829]; early endosome [GO:0005769]	early endosome to Golgi transport [GO:0034498]; intermembrane lipid transfer [GO:0120009]	GARP complex binding [GO:0062069]; lipid transfer activity [GO:0120013]; protein homodimerization activity [GO:0042803]								cluster 4	0	-1.50676	-1.75924	-1.2906
A1L170	C1orf226	Uncharacterized protein C1orf226											cluster 2	0	-1.94955	-2.21431	-1.66046
A1X283	SH3PXD2B	SH3 and PX domain-containing protein 2B (Adapter protein HOFI) (Factor for adipocyte differentiation 49) (Tyrosine kinase substrate with four SH3 domains)	anchoring junction [GO:0070161]; cell projection [GO:0042995]; cytoplasm [GO:0005737]; podosome [GO:0002102]	adipose tissue development [GO:0060612]; bone development [GO:0060348]; cell differentiation [GO:0030154]; extracellular matrix disassembly [GO:0022617]; eye development [GO:0001654]; heart development [GO:0007507]; podosome assembly [GO:0071800]; protein localization to membrane [GO:0072657]; skeletal system development [GO:0001501]; superoxide anion generation [GO:0042554]; superoxide metabolic…	phosphatidylinositol-3,5-bisphosphate binding [GO:0080025]; phosphatidylinositol-3-phosphate binding [GO:0032266]; phosphatidylinositol-5-phosphate binding [GO:0010314]; SH2 domain binding [GO:0042169]; superoxide-generating NADPH oxidase activator activity [GO:0016176]		cluster 3	0	-1.02543	-0.583648	-0.766548		cluster 3	0	-1.66907	-2.46508	-1.93512								cluster 10	0	0.123107	-0.343181	-0.354828		cluster 3	0	-0.643635	-1.88144	-1.16857
A2RUB1	MEIOC	Meiosis-specific coiled-coil domain-containing protein MEIOC (Meiosis-specific with coiled-coil domain protein)	cytoplasm [GO:0005737]; nucleus [GO:0005634]	chromosome organization involved in meiotic cell cycle [GO:0070192]; double-strand break repair [GO:0006302]; female meiosis I [GO:0007144]; germline cell cycle switching, mitotic to meiotic cell cycle [GO:0051729]; male meiosis I [GO:0007141]; metaphase chromosome alignment [GO:0051310]; mRNA stabilization [GO:0048255]; oocyte development [GO:0048599]; spermatid development [GO:0007286]; synapto…																										Increase	cluster 6	0	5.22515	4.42973	4.76798
A2VDF0	FUOM	Fucose mutarotase (EC 5.1.3.29)	cytosol [GO:0005829]	fucose metabolic process [GO:0006004]; fucosylation [GO:0036065]	fucose binding [GO:0042806]; L-fucose mutarotase activity [GO:0036373]; racemase and epimerase activity, acting on carbohydrates and derivatives [GO:0016857]		cluster 1	0	-0.13385	-0.0517506	-0.306413																				cluster 3	0	-1.28747	-2.18409	-0.843547
A3KMH1	VWA8	von Willebrand factor A domain-containing protein 8 (PEX7-binding protein 2) (P7BP2)	cytoplasm [GO:0005737]; mitochondrion [GO:0005739]; peroxisome [GO:0005777]		ATP binding [GO:0005524]; ATP hydrolysis activity [GO:0016887]													Decrease	cluster 1	0	-2.24656	-3.12494	-5.06439	Increase	cluster 3	0	-0.77066	3.68969	5.46521
A3KN83	SBNO1	Protein strawberry notch homolog 1 (Monocyte protein 3) (MOP-3)	nucleus [GO:0005634]	regulation of DNA-templated transcription [GO:0006355]; regulation of response to stimulus [GO:0048583]	chromatin DNA binding [GO:0031490]; histone binding [GO:0042393]		cluster 3	0	-0.885226	-0.498598	-0.793011
A4D1B5	GSAP	Gamma-secretase-activating protein (GSAP) (Protein pigeon homolog) [Cleaved into: Gamma-secretase-activating protein 16 kDa C-terminal form (GSAP-16K)]	trans-Golgi network [GO:0005802]	positive regulation of amyloid-beta formation [GO:1902004]; regulation of proteolysis [GO:0030162]	amyloid-beta binding [GO:0001540]																				cluster 8	0	-1.09877	-0.668848	0.952056	Decrease	cluster 1	0	-0.657212	-1.18885	-1.82542
A4D1E9	GTPBP10	GTP-binding protein 10 (Protein obg homolog 2) (ObgH2)	chromosome [GO:0005694]; mitochondrion [GO:0005739]; nucleolus [GO:0005730]	ribosome biogenesis [GO:0042254]	GTP binding [GO:0005525]; GTPase activity [GO:0003924]; magnesium ion binding [GO:0000287]; RNA binding [GO:0003723]													Decrease	cluster 1	0	-0.593275	-1.4319	-1.46659		cluster 2	0	0.285635	1.84615	1.15076
A4D1P6	WDR91	WD repeat-containing protein 91	cytosol [GO:0005829]; early endosome membrane [GO:0031901]; endosome membrane [GO:0010008]; extrinsic component of endosome membrane [GO:0031313]; late endosome membrane [GO:0031902]	early endosome to late endosome transport [GO:0045022]; negative regulation of phosphatidylinositol 3-kinase/protein kinase B signal transduction [GO:0051898]; regulation of protein catabolic process [GO:0042176]	phosphatidylinositol 3-kinase inhibitor activity [GO:0141039]; phosphatidylinositol 3-kinase regulator activity [GO:0035014]								cluster 4	0	-1.46744	-1.89137	-1.30732
A6NCJ1	TEKTIP1	Tektin bundle-interacting protein 1	axonemal A tubule inner sheath [GO:0160111]; axonemal microtubule [GO:0005879]				cluster 4	0	-0.474488	0.300241	-0.121511		cluster 13	0	0.147961	1.11563	0.192994								cluster 2	0	-0.397128	0.537944	-0.524075	Increase	cluster 6	0	0.622449	0.815387	0.314505
A6NDU8	RIMOC1	RAB7A-interacting MON1-CCZ1 complex subunit 1 (UPF0600 protein C5orf51)	cytosol [GO:0005829]; nucleoplasm [GO:0005654]	mitophagy [GO:0000423]			cluster 9	0	-0.152565	0.0904418	0.202221
A6NHR9	SMCHD1	Structural maintenance of chromosomes flexible hinge domain-containing protein 1 (SMC hinge domain-containing protein 1) (EC 3.6.1.-)	Barr body [GO:0001740]; site of double-strand break [GO:0035861]	chromosome organization [GO:0051276]; dosage compensation by inactivation of X chromosome [GO:0009048]; double-strand break repair [GO:0006302]; negative regulation of double-strand break repair via homologous recombination [GO:2000042]; nose development [GO:0043584]; positive regulation of DNA repair [GO:0045739]; positive regulation of double-strand break repair via nonhomologous end joining [G…	ATP binding [GO:0005524]; ATP hydrolysis activity [GO:0016887]; DNA binding [GO:0003677]; protein homodimerization activity [GO:0042803]		cluster 4	0	-0.817138	0.219341	0.247083
A8CG34	POM121C	Nuclear envelope pore membrane protein POM 121C (Nuclear pore membrane protein 121-2) (POM121-2) (Pore membrane protein of 121 kDa C)	endoplasmic reticulum membrane [GO:0005789]; nuclear envelope [GO:0005635]; nuclear membrane [GO:0031965]; nuclear pore [GO:0005643]; nucleoplasm [GO:0005654]	mRNA transport [GO:0051028]; protein import into nucleus [GO:0006606]; RNA export from nucleus [GO:0006405]	nuclear localization sequence binding [GO:0008139]; structural constituent of nuclear pore [GO:0017056]		cluster 3	0	-1.31697	-1.07326	-2.09971
B5ME19	EIF3CL	Eukaryotic translation initiation factor 3 subunit C-like protein	eukaryotic 43S preinitiation complex [GO:0016282]; eukaryotic 48S preinitiation complex [GO:0033290]; eukaryotic translation initiation factor 3 complex [GO:0005852]	formation of cytoplasmic translation initiation complex [GO:0001732]; translational initiation [GO:0006413]	RNA binding [GO:0003723]; translation initiation factor activity [GO:0003743]; translation initiation factor binding [GO:0031369]		cluster 3	0	-1.73638	-1.07246	-1.03339		cluster 2	0	-2.24608	-2.36418	-2.01509								cluster 2	0	0.336158	1.31197	0.21272		cluster 3	0	-0.509698	-1.29172	-0.981702
O00161	SNAP23	Synaptosomal-associated protein 23 (SNAP-23) (Vesicle-membrane fusion protein SNAP-23)	adherens junction [GO:0005912]; azurophil granule [GO:0042582]; cytoplasm [GO:0005737]; extracellular exosome [GO:0070062]; focal adhesion [GO:0005925]; mitochondrion [GO:0005739]; neuron projection [GO:0043005]; nucleoplasm [GO:0005654]; phagocytic vesicle membrane [GO:0030670]; plasma membrane [GO:0005886]; presynapse [GO:0098793]; SNARE complex [GO:0031201]; specific granule [GO:0042581]; spec…	exocytosis [GO:0006887]; histamine secretion by mast cell [GO:0002553]; membrane fusion [GO:0061025]; post-Golgi vesicle-mediated transport [GO:0006892]; protein transport [GO:0015031]; synaptic vesicle fusion to presynaptic active zone membrane [GO:0031629]; synaptic vesicle priming [GO:0016082]; vesicle targeting [GO:0006903]	SNAP receptor activity [GO:0005484]; syntaxin binding [GO:0019905]; syntaxin-1 binding [GO:0017075]		cluster 3	0	-1.52996	-1.75672	-2.03144		cluster 3	0	-1.6526	-1.99304	-1.76367														cluster 9	0	-0.122632	-0.236315	0.267768
O00178	GTPBP1	GTP-binding protein 1 (G-protein 1) (GP-1) (GP1)	cytoplasmic exosome (RNase complex) [GO:0000177]; cytosol [GO:0005829]; membrane [GO:0016020]	cytoplasmic translation [GO:0002181]; GTP metabolic process [GO:0046039]; immune response [GO:0006955]; positive regulation of mRNA catabolic process [GO:0061014]; signal transduction [GO:0007165]; translational elongation [GO:0006414]	alpha-aminoacyl-tRNA binding [GO:1904678]; GTP binding [GO:0005525]; GTPase activity [GO:0003924]; RNA binding [GO:0003723]; translation elongation factor activity [GO:0003746]; tRNA binding [GO:0000049]		cluster 10	0	-0.290694	-0.117131	0.154298		cluster 2	0	-1.86173	-2.03197	-1.57589														cluster 3	0	-1.57104	-1.91484	-1.73019
O00186	STXBP3	Syntaxin-binding protein 3 (Platelet Sec1 protein) (PSP) (Protein unc-18 homolog 3) (Unc18-3) (Protein unc-18 homolog C) (Unc-18C)	apical plasma membrane [GO:0016324]; basolateral plasma membrane [GO:0016323]; cytosol [GO:0005829]; extracellular exosome [GO:0070062]; phagocytic vesicle [GO:0045335]; plasma membrane [GO:0005886]; platelet alpha granule [GO:0031091]; presynapse [GO:0098793]; secretory granule [GO:0030141]; specific granule [GO:0042581]; tertiary granule [GO:0070820]	brain development [GO:0007420]; cellular response to type II interferon [GO:0071346]; insulin secretion [GO:0030073]; intracellular glucose homeostasis [GO:0001678]; intracellular protein transport [GO:0006886]; negative regulation of calcium ion-dependent exocytosis [GO:0045955]; negative regulation of glucose import [GO:0046325]; neurotransmitter secretion [GO:0007269]; neutrophil degranulation…	protein-containing complex binding [GO:0044877]; syntaxin binding [GO:0019905]; syntaxin-1 binding [GO:0017075]		cluster 3	0	-1.38742	-0.864069	-0.94688		cluster 2	0	-3.06201	-2.11388	-2.77443														cluster 7	0	-1.6746	-1.24981	-1.82755
O00194	RAB27B	Ras-related protein Rab-27B (EC 3.6.5.2) (C25KG)	apical plasma membrane [GO:0016324]; axon cytoplasm [GO:1904115]; exocytic vesicle [GO:0070382]; extracellular exosome [GO:0070062]; Golgi apparatus [GO:0005794]; Golgi stack [GO:0005795]; late endosome [GO:0005770]; melanosome [GO:0042470]; multivesicular body membrane [GO:0032585]; plasma membrane [GO:0005886]; platelet dense granule membrane [GO:0031088]; secretory granule [GO:0030141]; synapt…	anterograde axonal protein transport [GO:0099641]; exocytosis [GO:0006887]; multivesicular body sorting pathway [GO:0071985]; positive regulation of exocytosis [GO:0045921]; synaptic vesicle endocytosis [GO:0048488]	G protein activity [GO:0003925]; GDP binding [GO:0019003]; GTP binding [GO:0005525]; GTPase activity [GO:0003924]; myosin V binding [GO:0031489]; protein domain specific binding [GO:0019904]		cluster 3	0	-1.14701	-0.97306	-0.954898																				cluster 7	0	-0.907844	-1.07797	-1.06335
O00220	TNFRSF10A	Tumor necrosis factor receptor superfamily member 10A (Death receptor 4) (TNF-related apoptosis-inducing ligand receptor 1) (TRAIL receptor 1) (TRAIL-R1) (CD antigen CD261)	cell surface [GO:0009986]; cytosol [GO:0005829]; Golgi apparatus [GO:0005794]; membrane raft [GO:0045121]; plasma membrane [GO:0005886]	activation of NF-kappaB-inducing kinase activity [GO:0007250]; apoptotic process [GO:0006915]; cellular response to mechanical stimulus [GO:0071260]; extrinsic apoptotic signaling pathway [GO:0097191]; extrinsic apoptotic signaling pathway via death domain receptors [GO:0008625]; positive regulation of apoptotic process [GO:0043065]; signal transduction [GO:0007165]; TRAIL-activated apoptotic sig…	death receptor activity [GO:0005035]; identical protein binding [GO:0042802]; protease binding [GO:0002020]; signaling receptor activity [GO:0038023]; TRAIL binding [GO:0045569]							Recovered	cluster 1	0	-1.12598	-0.336	-0.322597
O00221	NFKBIE	NF-kappa-B inhibitor epsilon (NF-kappa-BIE) (I-kappa-B-epsilon) (IkB-E) (IkB-epsilon) (IkappaBepsilon)	cytoplasm [GO:0005737]; cytosol [GO:0005829]; fibrillar center [GO:0001650]; nucleoplasm [GO:0005654]	cellular response to tumor necrosis factor [GO:0071356]; cytoplasmic sequestering of transcription factor [GO:0042994]	NF-kappaB binding [GO:0051059]		cluster 3	0	-1.00086	-0.869189	-1.17736																				cluster 3	0	-1.41457	-1.85786	-0.871428
O00231	PSMD11	26S proteasome non-ATPase regulatory subunit 11 (26S proteasome regulatory subunit RPN6) (26S proteasome regulatory subunit S9) (26S proteasome regulatory subunit p44.5)	cytosol [GO:0005829]; extracellular region [GO:0005576]; ficolin-1-rich granule lumen [GO:1904813]; membrane [GO:0016020]; nucleoplasm [GO:0005654]; nucleus [GO:0005634]; proteasome accessory complex [GO:0022624]; proteasome complex [GO:0000502]; proteasome regulatory particle, lid subcomplex [GO:0008541]; secretory granule lumen [GO:0034774]	proteasome assembly [GO:0043248]; proteasome-mediated ubiquitin-dependent protein catabolic process [GO:0043161]; stem cell differentiation [GO:0048863]; ubiquitin-dependent protein catabolic process [GO:0006511]	structural molecule activity [GO:0005198]																									Increase	cluster 6	0	0.882823	0.317358	1.60582
O00232	PSMD12	26S proteasome non-ATPase regulatory subunit 12 (26S proteasome regulatory subunit RPN5) (26S proteasome regulatory subunit p55)	cytoplasm [GO:0005737]; cytosol [GO:0005829]; extracellular exosome [GO:0070062]; extracellular region [GO:0005576]; ficolin-1-rich granule lumen [GO:1904813]; membrane [GO:0016020]; nucleoplasm [GO:0005654]; proteasome accessory complex [GO:0022624]; proteasome complex [GO:0000502]; proteasome regulatory particle [GO:0005838]; proteasome regulatory particle, lid subcomplex [GO:0008541]; secretor…	proteasome-mediated ubiquitin-dependent protein catabolic process [GO:0043161]			cluster 14	0	0.409533	-6.34981	-0.469226
O00273	DFFA	DNA fragmentation factor subunit alpha (DNA fragmentation factor 45 kDa subunit) (DFF-45) (Inhibitor of CAD) (ICAD)	chromatin [GO:0000785]; cytosol [GO:0005829]; nucleoplasm [GO:0005654]; nucleus [GO:0005634]; plasma membrane [GO:0005886]; protein-containing complex [GO:0032991]	apoptotic DNA fragmentation [GO:0006309]; chaperone-mediated protein folding [GO:0061077]; negative regulation of apoptotic DNA fragmentation [GO:1902511]; negative regulation of deoxyribonuclease activity [GO:0032076]; negative regulation of execution phase of apoptosis [GO:1900118]; positive regulation of apoptotic process [GO:0043065]; thymocyte apoptotic process [GO:0070242]	deoxyribonuclease inhibitor activity [GO:0060703]; protein domain specific binding [GO:0019904]; protein folding chaperone [GO:0044183]		cluster 8	0	-0.719756	-0.0897801	-0.437093																				cluster 3	0	-0.623291	-1.22269	-1.18555
O00303	EIF3F	Eukaryotic translation initiation factor 3 subunit F (eIF3f) (Deubiquitinating enzyme eIF3f) (EC 3.4.19.12) (Eukaryotic translation initiation factor 3 subunit 5) (eIF-3-epsilon) (eIF3 p47)	cytosol [GO:0005829]; eukaryotic 43S preinitiation complex [GO:0016282]; eukaryotic 48S preinitiation complex [GO:0033290]; eukaryotic translation initiation factor 3 complex [GO:0005852]; eukaryotic translation initiation factor 3 complex, eIF3m [GO:0071541]; membrane [GO:0016020]; synapse [GO:0045202]	formation of cytoplasmic translation initiation complex [GO:0001732]; IRES-dependent viral translational initiation [GO:0075522]; protein deubiquitination [GO:0016579]; proteolysis [GO:0006508]; translational initiation [GO:0006413]	cysteine-type deubiquitinase activity [GO:0004843]; identical protein binding [GO:0042802]; metal-dependent deubiquitinase activity [GO:0140492]; translation initiation factor activity [GO:0003743]; translation initiation factor binding [GO:0031369]		cluster 4	0	-0.636428	0.145733	0.0289571	Recovered	cluster 1	0	-1.83555	-1.12483	-1.12258		cluster 10	0	-0.285652	-0.825331	-0.189222		cluster 2	0	-0.350776	0.971064	0.218179		cluster 3	0	-1.19912	-1.27056	-1.15154
O00400	SLC33A1	Acetyl-coenzyme A transporter 1 (AT-1) (Acetyl-CoA transporter 1) (Solute carrier family 33 member 1)	endoplasmic reticulum membrane [GO:0005789]; Golgi membrane [GO:0000139]; membrane [GO:0016020]; plasma membrane [GO:0005886]	acetyl-CoA transmembrane transport [GO:0035348]; transmembrane transport [GO:0055085]	acetyl-CoA transmembrane transporter activity [GO:0008521]; protein homodimerization activity [GO:0042803]								cluster 2	0	-2.15719	-2.19337	-2.29207
O00410	IPO5	Importin-5 (Imp5) (Importin subunit beta-3) (Karyopherin beta-3) (Ran-binding protein 5) (RanBP5)	cytoplasm [GO:0005737]; cytosol [GO:0005829]; Golgi apparatus [GO:0005794]; membrane [GO:0016020]; nuclear membrane [GO:0031965]; nuclear pore [GO:0005643]; nucleolus [GO:0005730]; nucleoplasm [GO:0005654]; nucleus [GO:0005634]	cellular response to amino acid stimulus [GO:0071230]; cytoplasmic pattern recognition receptor signaling pathway [GO:0002753]; negative regulation of cyclin-dependent protein serine/threonine kinase activity [GO:0045736]; NLS-bearing protein import into nucleus [GO:0006607]; positive regulation of protein import into nucleus [GO:0042307]; protein import into nucleus [GO:0006606]; ribosomal prote…	GTPase inhibitor activity [GO:0005095]; nuclear import signal receptor activity [GO:0061608]; nuclear localization sequence binding [GO:0008139]; RNA binding [GO:0003723]; small GTPase binding [GO:0031267]		cluster 8	0	-1.04407	-0.441276	-0.68986
O00411	POLRMT	DNA-directed RNA polymerase, mitochondrial (MtRPOL) (EC 2.7.7.6)	mitochondrial DNA-directed RNA polymerase complex [GO:0034245]; mitochondrial matrix [GO:0005759]; mitochondrial nucleoid [GO:0042645]; mitochondrion [GO:0005739]; protein-containing complex [GO:0032991]	mitochondrial transcription [GO:0006390]; transcription initiation at mitochondrial promoter [GO:0006391]	3'-5'-RNA exonuclease activity [GO:0000175]; DNA primase activity [GO:0003896]; DNA-directed 5'-3' RNA polymerase activity [GO:0003899]; mitochondrial promoter sequence-specific DNA binding [GO:0001018]; RNA binding [GO:0003723]; sequence-specific DNA binding [GO:0043565]		cluster 3	0	-1.50401	-1.04577	-0.987181							Decrease	cluster 1	0	-0.970457	-1.40546	-1.74059	Increase	cluster 3	0	-0.533555	0.35969	0.753407
O00429	DNM1L	Dynamin-1-like protein (EC 3.6.5.5) (Dnm1p/Vps1p-like protein) (DVLP) (Dynamin family member proline-rich carboxyl-terminal domain less) (Dymple) (Dynamin-like protein) (Dynamin-like protein 4) (Dynamin-like protein IV) (HdynIV) (Dynamin-related protein 1)	brush border [GO:0005903]; clathrin-coated pit [GO:0005905]; cytoplasm [GO:0005737]; cytosol [GO:0005829]; endoplasmic reticulum [GO:0005783]; endoplasmic reticulum membrane [GO:0005789]; Golgi apparatus [GO:0005794]; intracellular membrane-bounded organelle [GO:0043231]; membrane [GO:0016020]; microtubule [GO:0005874]; mitochondrial outer membrane [GO:0005741]; mitochondrion [GO:0005739]; perinu…	calcium ion transport [GO:0006816]; endocytosis [GO:0006897]; heart contraction [GO:0060047]; intracellular distribution of mitochondria [GO:0048312]; membrane fusion [GO:0061025]; mitochondrial fission [GO:0000266]; mitochondrial fragmentation involved in apoptotic process [GO:0043653]; mitochondrial membrane fission [GO:0090149]; mitochondrion organization [GO:0007005]; mitocytosis [GO:0160040]…	GTP binding [GO:0005525]; GTP-dependent protein binding [GO:0030742]; GTPase activator activity [GO:0005096]; GTPase activity [GO:0003924]; identical protein binding [GO:0042802]; lipid binding [GO:0008289]; microtubule binding [GO:0008017]; protein homodimerization activity [GO:0042803]; small GTPase binding [GO:0031267]; ubiquitin protein ligase binding [GO:0031625]		cluster 3	0	-0.704003	-0.569105	-0.710326		cluster 4	0	-2.27377	-2.68493	-1.37308		cluster 6	0	-2.22954	-3.70597	-2.5128		cluster 2	0	1.52554	3.13687	1.80247		cluster 3	0	-1.56976	-2.11583	-0.662758
O00487	PSMD14	26S proteasome non-ATPase regulatory subunit 14 (EC 3.4.19.-) (26S proteasome regulatory subunit RPN11) (26S proteasome-associated PAD1 homolog 1)	cytosol [GO:0005829]; cytosolic proteasome complex [GO:0031597]; extracellular region [GO:0005576]; ficolin-1-rich granule lumen [GO:1904813]; nucleoplasm [GO:0005654]; nucleus [GO:0005634]; proteasome accessory complex [GO:0022624]; proteasome complex [GO:0000502]; proteasome regulatory particle, lid subcomplex [GO:0008541]; secretory granule lumen [GO:0034774]	double-strand break repair via homologous recombination [GO:0000724]; double-strand break repair via nonhomologous end joining [GO:0006303]; proteasome-mediated ubiquitin-dependent protein catabolic process [GO:0043161]; protein K63-linked deubiquitination [GO:0070536]; regulation of proteasomal protein catabolic process [GO:0061136]; response to ethanol [GO:0045471]; ubiquitin-dependent protein …	endopeptidase activator activity [GO:0061133]; K63-linked deubiquitinase activity [GO:0061578]; metal ion binding [GO:0046872]; metal-dependent deubiquitinase activity [GO:0140492]; metallopeptidase activity [GO:0008237]; proteasome binding [GO:0070628]		cluster 3	0	-2.18335	-1.53904	-1.33014														cluster 4	0	-1.94244	-1.17269	-1.14908	Decrease	cluster 1	0	-0.215358	-0.419194	-0.714298
O00499	BIN1	Myc box-dependent-interacting protein 1 (Amphiphysin II) (Amphiphysin-like protein) (Box-dependent myc-interacting protein 1) (Bridging integrator 1)	actin cytoskeleton [GO:0015629]; axon [GO:0030424]; axon initial segment [GO:0043194]; axon terminus [GO:0043679]; cerebellar mossy fiber [GO:0044300]; cytoplasm [GO:0005737]; cytosol [GO:0005829]; dendrite [GO:0030425]; endosome [GO:0005768]; extrinsic component of synaptic vesicle membrane [GO:0098850]; glutamatergic synapse [GO:0098978]; I band [GO:0031674]; lipid tube [GO:0060987]; membrane […	cytoskeleton organization [GO:0007010]; endocytosis [GO:0006897]; endosome to lysosome transport [GO:0008333]; lipid tube assembly [GO:0060988]; negative regulation of amyloid-beta formation [GO:1902430]; negative regulation of aspartic-type endopeptidase activity involved in amyloid precursor protein catabolic process [GO:1902960]; negative regulation of calcium ion transmembrane transport via h…	actin filament binding [GO:0051015]; aspartic-type endopeptidase inhibitor activity [GO:0019828]; clathrin binding [GO:0030276]; GTPase binding [GO:0051020]; identical protein binding [GO:0042802]; phospholipid binding [GO:0005543]; protease binding [GO:0002020]; protein-folding chaperone binding [GO:0051087]; RNA polymerase binding [GO:0070063]; tau protein binding [GO:0048156]		cluster 10	0	-0.677688	-0.321521	0.122866
O00505	KPNA3	Importin subunit alpha-4 (Importin alpha Q2) (Qip2) (Karyopherin subunit alpha-3) (SRP1-gamma)	cytosol [GO:0005829]; host cell [GO:0043657]; NLS-dependent protein nuclear import complex [GO:0042564]; nuclear pore [GO:0005643]; nucleoplasm [GO:0005654]; nucleus [GO:0005634]	NLS-bearing protein import into nucleus [GO:0006607]; protein import into nucleus [GO:0006606]; protein-containing complex assembly [GO:0065003]; symbiont entry into host cell [GO:0046718]; viral penetration into host nucleus [GO:0075732]	nuclear import signal receptor activity [GO:0061608]; nuclear localization sequence binding [GO:0008139]		cluster 4	0	-0.638002	0.162317	-0.17352		cluster 2	0	-1.90881	-1.48654	-1.90622								cluster 4	0	-0.653178	-0.104064	-0.664349		cluster 3	0	-1.27081	-1.64885	-1.7327
O00560	SDCBP	Syntenin-1 (Melanoma differentiation-associated protein 9) (MDA-9) (Pro-TGF-alpha cytoplasmic domain-interacting protein 18) (TACIP18) (Scaffold protein Pbp1) (Syndecan-binding protein 1)	adherens junction [GO:0005912]; azurophil granule lumen [GO:0035578]; blood microparticle [GO:0072562]; cytoplasm [GO:0005737]; cytoskeleton [GO:0005856]; cytosol [GO:0005829]; endoplasmic reticulum membrane [GO:0005789]; extracellular exosome [GO:0070062]; extracellular region [GO:0005576]; extracellular space [GO:0005615]; extracellular vesicle [GO:1903561]; focal adhesion [GO:0005925]; interle…	actin cytoskeleton organization [GO:0030036]; chemical synaptic transmission [GO:0007268]; intracellular signal transduction [GO:0035556]; negative regulation of receptor internalization [GO:0002091]; negative regulation of transcription by RNA polymerase II [GO:0000122]; positive regulation of cell growth [GO:0030307]; positive regulation of cell migration [GO:0030335]; positive regulation of ce…	cell adhesion molecule binding [GO:0050839]; cytoskeletal anchor activity [GO:0008093]; ephrin receptor binding [GO:0046875]; frizzled binding [GO:0005109]; growth factor binding [GO:0019838]; identical protein binding [GO:0042802]; interleukin-5 receptor binding [GO:0005137]; ionotropic glutamate receptor binding [GO:0035255]; neurexin family protein binding [GO:0042043]; phosphatidylinositol-4,…																										cluster 4	0	-0.512414	-0.455413	0.110263
O00566	MPHOSPH10	U3 small nucleolar ribonucleoprotein protein MPP10 (M phase phosphoprotein 10)	chromosome [GO:0005694]; Mpp10 complex [GO:0034457]; nucleolus [GO:0005730]; nucleoplasm [GO:0005654]; small-subunit processome [GO:0032040]; sno(s)RNA-containing ribonucleoprotein complex [GO:0005732]	maturation of SSU-rRNA [GO:0030490]; ribosomal small subunit biogenesis [GO:0042274]; RNA processing [GO:0006396]; RNA splicing [GO:0008380]; RNA splicing, via transesterification reactions [GO:0000375]	RNA binding [GO:0003723]		cluster 8	0	-0.524762	-0.247742	-0.405852
O00571	DDX3X	ATP-dependent RNA helicase DDX3X (EC 3.6.4.13) (CAP-Rf) (DEAD box protein 3, X-chromosomal) (DEAD box, X isoform) (DBX) (Helicase-like protein 2) (HLP2)	cell leading edge [GO:0031252]; centrosome [GO:0005813]; cytoplasm [GO:0005737]; cytoplasmic stress granule [GO:0010494]; cytosol [GO:0005829]; extracellular exosome [GO:0070062]; extracellular region [GO:0005576]; ficolin-1-rich granule lumen [GO:1904813]; lamellipodium [GO:0030027]; NLRP3 inflammasome complex [GO:0072559]; nucleoplasm [GO:0005654]; nucleus [GO:0005634]; P granule [GO:0043186]; …	cell differentiation [GO:0030154]; cellular response to arsenic-containing substance [GO:0071243]; cellular response to osmotic stress [GO:0071470]; cellular response to virus [GO:0098586]; chromosome segregation [GO:0007059]; cytosolic ribosome assembly [GO:0042256]; extrinsic apoptotic signaling pathway via death domain receptors [GO:0008625]; gamete generation [GO:0007276]; innate immune respo…	ATP binding [GO:0005524]; ATP hydrolysis activity [GO:0016887]; cadherin binding [GO:0045296]; CTPase activity [GO:0043273]; DNA binding [GO:0003677]; DNA helicase activity [GO:0003678]; eukaryotic initiation factor 4E binding [GO:0008190]; gamma-tubulin binding [GO:0043015]; GTPase activity [GO:0003924]; mRNA 5'-UTR binding [GO:0048027]; mRNA binding [GO:0003729]; poly(A) binding [GO:0008143]; p…		cluster 3	0	-2.45819	-2.3987	-1.78993		cluster 4	0	-1.99236	-3.10391	-1.96788							Decrease	cluster 6	0	-1.53749	-1.73389	-1.84643		cluster 5	0	0.465833	-0.705207	-0.177955
O00592	PODXL	Podocalyxin (GCTM-2 antigen) (Gp200) (Podocalyxin-like protein 1) (PC) (PCLP-1)	apical plasma membrane [GO:0016324]; centriolar satellite [GO:0034451]; cytoplasm [GO:0005737]; extracellular exosome [GO:0070062]; extracellular space [GO:0005615]; filopodium [GO:0030175]; intracellular membrane-bounded organelle [GO:0043231]; lamellipodium [GO:0030027]; membrane raft [GO:0045121]; microvillus membrane [GO:0031528]; nucleolus [GO:0005730]; plasma membrane [GO:0005886]; ruffle […	cell adhesion [GO:0007155]; cell migration [GO:0016477]; epithelial tube formation [GO:0072175]; negative regulation of cell adhesion [GO:0007162]; negative regulation of cell-cell adhesion [GO:0022408]; podocyte development [GO:0072015]; positive regulation of cell migration [GO:0030335]; positive regulation of cell-cell adhesion mediated by integrin [GO:0033634]; regulation of microvillus assem…									cluster 3	0	-1.0763	-1.28917	-1.15996													Decrease	cluster 1	0	-0.344224	-0.742709	-0.784571
O00712	NFIB	Nuclear factor 1 B-type (NF1-B) (Nuclear factor 1/B) (CCAAT-box-binding transcription factor) (CTF) (Nuclear factor I/B) (NF-I/B) (NFI-B) (TGGCA-binding protein)	cerebellar mossy fiber [GO:0044300]; chromatin [GO:0000785]; fibrillar center [GO:0001650]; nucleoplasm [GO:0005654]; nucleus [GO:0005634]	anterior commissure morphogenesis [GO:0021960]; brain development [GO:0007420]; cell differentiation involved in salivary gland development [GO:0060689]; cell proliferation in forebrain [GO:0021846]; chondrocyte differentiation [GO:0002062]; club cell differentiation [GO:0060486]; commissural neuron axon guidance [GO:0071679]; DNA replication [GO:0006260]; exit from mitosis [GO:0010458]; gene exp…	DNA binding [GO:0003677]; DNA-binding transcription activator activity, RNA polymerase II-specific [GO:0001228]; DNA-binding transcription factor activity, RNA polymerase II-specific [GO:0000981]; RNA polymerase II cis-regulatory region sequence-specific DNA binding [GO:0000978]; sequence-specific double-stranded DNA binding [GO:1990837]; transcription regulator inhibitor activity [GO:0140416]																										cluster 2	0	-1.55948	-1.56481	-1.06645
O00750	PIK3C2B	Phosphatidylinositol 4-phosphate 3-kinase C2 domain-containing subunit beta (PI3K-C2-beta) (PtdIns-3-kinase C2 subunit beta) (EC 2.7.1.137) (EC 2.7.1.154) (C2-PI3K) (Phosphoinositide 3-kinase-C2-beta)	cytoplasm [GO:0005737]; cytosol [GO:0005829]; endocytic vesicle [GO:0030139]; endoplasmic reticulum [GO:0005783]; intracellular membrane-bounded organelle [GO:0043231]; nucleoplasm [GO:0005654]; phosphatidylinositol 3-kinase complex [GO:0005942]; plasma membrane [GO:0005886]	autophagosome organization [GO:1905037]; cell migration [GO:0016477]; cellular response to starvation [GO:0009267]; phosphatidylinositol 3-kinase/protein kinase B signal transduction [GO:0043491]; phosphatidylinositol-3-phosphate biosynthetic process [GO:0036092]; phosphatidylinositol-mediated signaling [GO:0048015]; phosphorylation [GO:0016310]	1-phosphatidylinositol-3-kinase activity [GO:0016303]; 1-phosphatidylinositol-4-phosphate 3-kinase activity [GO:0035005]; ATP binding [GO:0005524]; phosphatidylinositol binding [GO:0035091]		cluster 3	0	-1.05191	-0.645122	-0.852843		cluster 4	0	-1.45069	-2.39667	-0.936694							Decrease	cluster 6	0	-1.38846	-0.726169	-1.9833		cluster 3	0	-0.398782	-1.75155	-0.0838512
O00763	ACACB	Acetyl-CoA carboxylase 2 (EC 6.4.1.2) (ACC-beta)	cytosol [GO:0005829]; mitochondrial fatty acid beta-oxidation multienzyme complex [GO:0016507]; mitochondrial outer membrane [GO:0005741]; mitochondrion [GO:0005739]; nucleus [GO:0005634]	acetyl-CoA metabolic process [GO:0006084]; energy homeostasis [GO:0097009]; fatty acid biosynthetic process [GO:0006633]; fatty acid oxidation [GO:0019395]; glucose import [GO:0046323]; intracellular aspartate homeostasis [GO:0090459]; intracellular glutamate homeostasis [GO:0090461]; lactic acid secretion [GO:0046722]; malonyl-CoA biosynthetic process [GO:2001295]; negative regulation of fatty a…	acetyl-CoA carboxylase activity [GO:0003989]; ATP binding [GO:0005524]; biotin binding [GO:0009374]; identical protein binding [GO:0042802]; metal ion binding [GO:0046872]		cluster 7	0	0.198887	0.560117	-0.35189		cluster 3	0	-1.76295	-1.67293	-2.13684		cluster 7	0	-0.695412	-0.383147	-0.961083		cluster 1	0	0.894299	0.943264	0.609193		cluster 2	0	-1.96184	-2.23305	-1.78495
O00767	SCD	Stearoyl-CoA desaturase (hSCD1) (EC 1.14.19.1) (Acyl-CoA desaturase) (Delta(9)-desaturase) (Delta-9 desaturase) (Fatty acid desaturase)	endoplasmic reticulum [GO:0005783]; endoplasmic reticulum membrane [GO:0005789]; membrane [GO:0016020]; nucleolus [GO:0005730]	monounsaturated fatty acid biosynthetic process [GO:1903966]; positive regulation of cold-induced thermogenesis [GO:0120162]; response to fatty acid [GO:0070542]; unsaturated fatty acid biosynthetic process [GO:0006636]	iron ion binding [GO:0005506]; oxidoreductase activity [GO:0016491]; palmitoyl-CoA 9-desaturase activity [GO:0032896]; stearoyl-CoA 9-desaturase activity [GO:0004768]							Decrease	cluster 7	0	-1.25597	-1.57977	-2.412													Decrease	cluster 1	0	-1.17163	-1.94677	-2.46095
O14523	C2CD2L	Phospholipid transfer protein C2CD2L (C2 domain-containing protein 2-like) (C2CD2-like) (Transmembrane protein 24)	cortical endoplasmic reticulum [GO:0032541]; cytoplasmic side of apical plasma membrane [GO:0098592]; endoplasmic reticulum membrane [GO:0005789]; endoplasmic reticulum-plasma membrane contact site [GO:0140268]; plasma membrane [GO:0005886]	positive regulation of insulin secretion involved in cellular response to glucose stimulus [GO:0035774]	insulin binding [GO:0043559]; phosphatidylinositol binding [GO:0035091]; phosphatidylinositol transfer activity [GO:0008526]								cluster 3	0	-0.602731	-1.15687	-0.998898
O14595	CTDSP2	Carboxy-terminal domain RNA polymerase II polypeptide A small phosphatase 2 (EC 3.1.3.16) (Nuclear LIM interactor-interacting factor 2) (NLI-interacting factor 2) (Protein OS-4) (Small C-terminal domain phosphatase 2) (Small CTD phosphatase 2) (SCP2)	nucleoplasm [GO:0005654]	negative regulation of G1/S transition of mitotic cell cycle [GO:2000134]; negative regulation of protein phosphorylation [GO:0001933]; protein dephosphorylation [GO:0006470]	metal ion binding [GO:0046872]; myosin phosphatase activity [GO:0017018]; RNA polymerase II CTD heptapeptide repeat phosphatase activity [GO:0008420]								cluster 3	0	-1.95583	-2.57723	-2.09127
O14617	AP3D1	AP-3 complex subunit delta-1 (AP-3 complex subunit delta) (Adaptor-related protein complex 3 subunit delta-1) (Delta-adaptin)	AP-3 adaptor complex [GO:0030123]; axon cytoplasm [GO:1904115]; early endosome [GO:0005769]; endosome membrane [GO:0010008]; glutamatergic synapse [GO:0098978]; Golgi apparatus [GO:0005794]; Golgi membrane [GO:0000139]; lysosomal membrane [GO:0005765]; membrane [GO:0016020]; postsynapse [GO:0098794]; presynaptic endosome [GO:0098830]; terminal bouton [GO:0043195]	anterograde axonal transport [GO:0008089]; anterograde synaptic vesicle transport [GO:0048490]; antigen processing and presentation, exogenous lipid antigen via MHC class Ib [GO:0048007]; clathrin-coated vesicle cargo loading, AP-3-mediated [GO:0035654]; endosome to melanosome transport [GO:0035646]; Golgi to vacuole transport [GO:0006896]; intracellular protein transport [GO:0006886]; intracellu…			cluster 3	0	-0.821429	-0.523157	-0.586557		cluster 4	0	-1.8375	-2.41875	-1.13898														cluster 3	0	-1.01607	-1.89559	-0.552423
O14745	NHERF1	Na(+)/H(+) exchange regulatory cofactor NHE-RF1 (NHERF-1) (Ezrin-radixin-moesin-binding phosphoprotein 50) (EBP50) (Regulatory cofactor of Na(+)/H(+) exchanger) (Sodium-hydrogen exchanger regulatory factor 1) (Solute carrier family 9 isoform A3 regulatory factor 1)	actin cytoskeleton [GO:0015629]; apical plasma membrane [GO:0016324]; brush border membrane [GO:0031526]; cell periphery [GO:0071944]; cytoplasm [GO:0005737]; endomembrane system [GO:0012505]; extracellular exosome [GO:0070062]; filopodium [GO:0030175]; membrane [GO:0016020]; microvillus [GO:0005902]; microvillus membrane [GO:0031528]; perinuclear region of cytoplasm [GO:0048471]; plasma membrane…	actin cytoskeleton organization [GO:0030036]; adenylate cyclase-activating dopamine receptor signaling pathway [GO:0007191]; auditory receptor cell stereocilium organization [GO:0060088]; bile acid secretion [GO:0032782]; cerebrospinal fluid circulation [GO:0090660]; cilium organization [GO:0044782]; establishment of epithelial cell apical/basal polarity [GO:0045198]; establishment of Golgi local…	beta-2 adrenergic receptor binding [GO:0031698]; beta-catenin binding [GO:0008013]; channel activator activity [GO:0099103]; chloride channel regulator activity [GO:0017081]; dopamine receptor binding [GO:0050780]; gamma-aminobutyric acid transmembrane transporter activity [GO:0015185]; growth factor receptor binding [GO:0070851]; identical protein binding [GO:0042802]; myosin II binding [GO:0045…		cluster 3	0	-1.09518	-0.921417	-0.95773		cluster 3	0	-1.90779	-2.54353	-1.88908							Decrease	cluster 6	0	-1.26377	-1.0886	-2.60607		cluster 3	0	-0.812607	-1.62211	-0.931346
O14776	TCERG1	Transcription elongation regulator 1 (TATA box-binding protein-associated factor 2S) (Transcription factor CA150)	nuclear speck [GO:0016607]; nucleoplasm [GO:0005654]; nucleus [GO:0005634]	mRNA processing [GO:0006397]; negative regulation of transcription by RNA polymerase II [GO:0000122]; negative regulation of transcription elongation by RNA polymerase II [GO:0034244]; positive regulation of transcription by RNA polymerase II [GO:0045944]; positive regulation of transcription elongation by RNA polymerase II [GO:0032968]; RNA splicing [GO:0008380]	identical protein binding [GO:0042802]; RNA binding [GO:0003723]; RNA polymerase binding [GO:0070063]; RNA polymerase II-specific DNA-binding transcription factor binding [GO:0061629]; transcription coactivator activity [GO:0003713]; transcription coregulator activity [GO:0003712]; transcription corepressor activity [GO:0003714]; transcription elongation factor activity [GO:0003711]; ubiquitin-li…		cluster 3	0	-0.558969	-0.33491	-0.696655
O14795	UNC13B	Protein unc-13 homolog B (Munc13-2) (munc13)	cytosol [GO:0005829]; Golgi apparatus [GO:0005794]; membrane [GO:0016020]; neuromuscular junction [GO:0031594]; plasma membrane [GO:0005886]; presynaptic active zone [GO:0048786]; presynaptic active zone cytoplasmic component [GO:0098831]; presynaptic membrane [GO:0042734]; synaptic vesicle membrane [GO:0030672]; terminal bouton [GO:0043195]	acrosomal vesicle exocytosis [GO:0060478]; cellular response to glucose stimulus [GO:0071333]; chemical synaptic transmission [GO:0007268]; dense core granule priming [GO:0061789]; neuromuscular junction development [GO:0007528]; neuronal dense core vesicle exocytosis [GO:0099011]; positive regulation of apoptotic process [GO:0043065]; positive regulation of inhibitory postsynaptic potential [GO:…	calcium ion binding [GO:0005509]; calmodulin binding [GO:0005516]; diacylglycerol binding [GO:0019992]; GTP-dependent protein binding [GO:0030742]; phospholipid binding [GO:0005543]; small GTPase binding [GO:0031267]; syntaxin-1 binding [GO:0017075]		cluster 8	0	-1.18223	-0.0140096	-0.721681		cluster 3	0	-1.77299	-1.66815	-2.02317														cluster 3	0	-0.59076	-1.65414	-1.30149
O14828	SCAMP3	Secretory carrier-associated membrane protein 3 (Secretory carrier membrane protein 3)	extracellular exosome [GO:0070062]; intracellular membrane-bounded organelle [GO:0043231]; recycling endosome membrane [GO:0055038]; trans-Golgi network membrane [GO:0032588]	post-Golgi vesicle-mediated transport [GO:0006892]; protein transport [GO:0015031]	ubiquitin protein ligase binding [GO:0031625]								cluster 3	0	-1.68563	-2.4825	-1.91666
O14880	MGST3	Glutathione S-transferase 3, mitochondrial (GST-3) (EC 2.5.1.-) (Glutathione peroxidase MGST3) (EC 1.11.1.-) (LTC4 synthase MGST3) (EC 4.4.1.20)	endoplasmic reticulum [GO:0005783]; endoplasmic reticulum membrane [GO:0005789]; intracellular membrane-bounded organelle [GO:0043231]; membrane [GO:0016020]; mitochondrial outer membrane [GO:0005741]; nuclear envelope [GO:0005635]	arachidonic acid metabolic process [GO:0019369]; leukotriene biosynthetic process [GO:0019370]; lipid metabolic process [GO:0006629]; prostanoid metabolic process [GO:0006692]	glutathione peroxidase activity [GO:0004602]; glutathione transferase activity [GO:0004364]; identical protein binding [GO:0042802]; leukotriene-C4 synthase activity [GO:0004464]																										cluster 2	0	-1.04542	-1.16036	-0.941064
O14929	HAT1	Histone acetyltransferase type B catalytic subunit (EC 2.3.1.48) (Histone acetyltransferase 1)	chromatin [GO:0000785]; chromosome, telomeric region [GO:0000781]; mitochondrion [GO:0005739]; nuclear matrix [GO:0016363]; nucleoplasm [GO:0005654]; nucleus [GO:0005634]; protein-containing complex [GO:0032991]	chromosome organization [GO:0051276]; internal protein amino acid acetylation [GO:0006475]; nucleosome assembly [GO:0006334]; subtelomeric heterochromatin formation [GO:0031509]	histone acetyltransferase activity [GO:0004402]; histone binding [GO:0042393]; histone H4 acetyltransferase activity [GO:0010485]; histone H4K12 acetyltransferase activity [GO:0043997]		cluster 8	0	-0.525368	0.0554937	-0.277132
[truncated: 1,647 more rows]
